# Supplementary material
Source: publisher figshare collection journal article supplement (https://gsajournals.figshare.com/articles/dataset/_/6166364)
Supplement: Supplementary file 1 [file 1]

Archive with 5 entries (5 files):
- TableS4_Cervus_ACC_Regional_Heritability_Results.txt
- TableS5_Cervus_ACC_Regional_Heritability_Results_sig_Region.txt
- TableS3_Cervus_ACC_GWAS_Results.zip
- TableS2_ACC_Data_per_Chromosome.zip
- Supplemental Tables and Figures.pdf
