# Supplementary material
Source: publisher figshare collection journal article supplement (https://gsajournals.figshare.com/articles/dataset/_/6166364)
Supplement: Supplementary file 1 [file 1 › TableS4_Cervus_ACC_Regional_Heritability_Results.txt]

Analysis.ID	RRID.Sex	model1.Li	model2.Li	CEL.LG	Start.Order	Window.Size	Stop.Order	Start.Cumu.Order	Start.Cumu.Position	Start.Position	Start.BTA.Position	Stop.Cumu.Order	Stop.Cumu.Position	Stop.Position	Stop.BTA.Position	Window.Bp	Chi2	P	Mid.Position	Mid.Cumu.Position	Mid.BTA.Position	Start.SNP.Name	Stop.SNP.Name
LG1.b.1.20	Both	-2818.06862537693	-2817.74695409879	1	1	20	20	1	1033920	1033920	1479373	20	2517487	2517487	2962940	1483567	0.643342556269999	0.422502994674347	1775703.5	1775703.5	2221156.5	cela1_red_15_1479373	cela1_red_15_2962940
LG1.b.1.20	Male	-884.661873894947	-884.591887148071	1	1	20	20	1	1033920	1033920	1479373	20	2517487	2517487	2962940	1483567	0.139973493753359	0.708307364504362	1775703.5	1775703.5	2221156.5	cela1_red_15_1479373	cela1_red_15_2962940
LG1.b.1.20	Female	-1896.57090203511	-1896.48626541662	1	1	20	20	1	1033920	1033920	1479373	20	2517487	2517487	2962940	1483567	0.16927323697746	0.68075851420143	1775703.5	1775703.5	2221156.5	cela1_red_15_1479373	cela1_red_15_2962940
LG1.b.11.20	Both	-2818.05897477173	-2818.02230910533	1	11	20	30	11	1519294	1519294	1964747	30	2950987	2950987	3396440	1431693	0.0733313327964424	0.786546716324125	2235140.5	2235140.5	2680593.5	cela1_red_15_1964747	cela1_red_15_3396440
LG1.b.11.20	Male	-884.66139459338	-884.659551761457	1	11	20	30	11	1519294	1519294	1964747	30	2950987	2950987	3396440	1431693	0.00368566384531732	0.951590431563353	2235140.5	2235140.5	2680593.5	cela1_red_15_1964747	cela1_red_15_3396440
LG1.b.11.20	Female	-1896.56364445286	-1896.56364738645	1	11	20	30	11	1519294	1519294	1964747	30	2950987	2950987	3396440	1431693	-5.86717715123086e-06	1	2235140.5	2235140.5	2680593.5	cela1_red_15_1964747	cela1_red_15_3396440
LG1.b.21.20	Both	-2818.05598415506	-2818.05579955167	1	21	20	40	21	2587991	2587991	3033444	40	3530885	3530885	3976338	942894	0.000369206769391894	0.984669787825143	3059438	3059438	3504891	cela1_red_15_3033444	cela1_red_15_3976338
LG1.b.21.20	Male	-884.660687457072	-884.660688269797	1	21	20	40	21	2587991	2587991	3033444	40	3530885	3530885	3976338	942894	-1.62545006787695e-06	1	3059438	3059438	3504891	cela1_red_15_3033444	cela1_red_15_3976338
LG1.b.21.20	Female	-1896.56106717626	-1896.56107234797	1	21	20	40	21	2587991	2587991	3033444	40	3530885	3530885	3976338	942894	-1.03434299489891e-05	1	3059438	3059438	3504891	cela1_red_15_3033444	cela1_red_15_3976338
LG1.b.31.20	Both	-2818.05419964981	-2818.05420081019	1	31	20	50	31	2977730	2977730	3423183	50	4080752	4080752	4526205	1103022	-2.3207676349557e-06	1	3529241	3529241	3974694	cela1_red_15_3423183	cela1_red_15_4526205
LG1.b.31.20	Male	-884.659832422449	-884.659834349185	1	31	20	50	31	2977730	2977730	3423183	50	4080752	4080752	4526205	1103022	-3.85347311748774e-06	1	3529241	3529241	3974694	cela1_red_15_3423183	cela1_red_15_4526205
LG1.b.31.20	Female	-1896.56118781095	-1896.56119245147	1	31	20	50	31	2977730	2977730	3423183	50	4080752	4080752	4526205	1103022	-9.28103600017494e-06	1	3529241	3529241	3974694	cela1_red_15_3423183	cela1_red_15_4526205
LG1.b.41.20	Both	-2818.05218061074	-2818.05218578135	1	41	20	60	41	3567953	3567953	4013406	60	5032528	5032528	5477981	1464575	-1.03412276075687e-05	1	4300240.5	4300240.5	4745693.5	cela1_red_15_4013406	cela1_red_15_5477981
LG1.b.41.20	Male	-884.659359400119	-884.659361974139	1	41	20	60	41	3567953	3567953	4013406	60	5032528	5032528	5477981	1464575	-5.14804037266003e-06	1	4300240.5	4300240.5	4745693.5	cela1_red_15_4013406	cela1_red_15_5477981
LG1.b.41.20	Female	-1896.56184871921	-1896.561861469	1	41	20	60	41	3567953	3567953	4013406	60	5032528	5032528	5477981	1464575	-2.54995679824788e-05	1	4300240.5	4300240.5	4745693.5	cela1_red_15_4013406	cela1_red_15_5477981
LG1.b.51.20	Both	-2818.05437811166	-2818.05438210614	1	51	20	70	51	4219471	4219471	4664924	70	5819193	5819193	6264646	1599722	-7.98895507614361e-06	1	5019332	5019332	5464785	cela1_red_15_4664924	cela1_red_15_6264646
LG1.b.51.20	Male	-884.662676294791	-884.249110233495	1	51	20	70	51	4219471	4219471	4664924	70	5819193	5819193	6264646	1599722	0.827132122593639	0.363103118690149	5019332	5019332	5464785	cela1_red_15_4664924	cela1_red_15_6264646
LG1.b.51.20	Female	-1896.56062820496	-1896.56063359978	1	51	20	70	51	4219471	4219471	4664924	70	5819193	5819193	6264646	1599722	-1.07896375993732e-05	1	5019332	5019332	5464785	cela1_red_15_4664924	cela1_red_15_6264646
LG1.b.61.20	Both	-2818.06844609042	-2817.71005954833	1	61	20	80	61	5107372	5107372	5552825	80	6449849	6449849	6895302	1342477	0.7167730841702	0.397204440245335	5778610.5	5778610.5	6224063.5	cela1_red_15_5552825	cela1_red_15_6895302
LG1.b.61.20	Male	-884.668625787269	-881.352914828359	1	61	20	80	61	5107372	5107372	5552825	80	6449849	6449849	6895302	1342477	6.63142191781913	0.0100195250840043	5778610.5	5778610.5	6224063.5	cela1_red_15_5552825	cela1_red_15_6895302
LG1.b.61.20	Female	-1896.56187531722	-1896.56187957486	1	61	20	80	61	5107372	5107372	5552825	80	6449849	6449849	6895302	1342477	-8.51529694045894e-06	1	5778610.5	5778610.5	6224063.5	cela1_red_15_5552825	cela1_red_15_6895302
LG1.b.71.20	Both	-2818.08103987342	-2816.85253755959	1	71	20	90	71	5908743	5908743	6354196	90	7037181	7037181	7482634	1128438	2.45700462766945	0.117001712180873	6472962	6472962	6918415	cela1_red_15_6354196	cela1_red_15_7482634
LG1.b.71.20	Male	-884.669939445509	-880.565628167408	1	71	20	90	71	5908743	5908743	6354196	90	7037181	7037181	7482634	1128438	8.20862255620204	0.00416917885144052	6472962	6472962	6918415	cela1_red_15_6354196	cela1_red_15_7482634
LG1.b.71.20	Female	-1896.56635851268	-1896.56635925262	1	71	20	90	71	5908743	5908743	6354196	90	7037181	7037181	7482634	1128438	-1.47988066601101e-06	1	6472962	6472962	6918415	cela1_red_15_6354196	cela1_red_15_7482634
LG1.b.81.20	Both	-2818.06495369469	-2817.67516767522	1	81	20	100	81	6495964	6495964	6941417	100	7637043	7637043	8082496	1141079	0.779572038940387	0.377272057443345	7066503.5	7066503.5	7511956.5	cela1_red_15_6941417	cela1_red_15_8082496
LG1.b.81.20	Male	-884.665597697244	-881.601340186332	1	81	20	100	81	6495964	6495964	6941417	100	7637043	7637043	8082496	1141079	6.12851502182275	0.0133018550996201	7066503.5	7066503.5	7511956.5	cela1_red_15_6941417	cela1_red_15_8082496
LG1.b.81.20	Female	-1896.56171393632	-1896.56171779236	1	81	20	100	81	6495964	6495964	6941417	100	7637043	7637043	8082496	1141079	-7.71206759964116e-06	1	7066503.5	7066503.5	7511956.5	cela1_red_15_6941417	cela1_red_15_8082496
LG1.b.91.20	Both	-2818.05822771021	-2818.03638338124	1	91	20	110	91	7067302	7067302	7512755	110	8305777	8305777	8751230	1238475	0.043688657934581	0.83443393748656	7686539.5	7686539.5	8131992.5	cela1_red_15_7512755	cela1_red_15_8751230
LG1.b.91.20	Male	-884.66350054213	-884.122453658048	1	91	20	110	91	7067302	7067302	7512755	110	8305777	8305777	8751230	1238475	1.08209376816399	0.298229637563673	7686539.5	7686539.5	8131992.5	cela1_red_15_7512755	cela1_red_15_8751230
LG1.b.91.20	Female	-1896.55934847915	-1896.5593539148	1	91	20	110	91	7067302	7067302	7512755	110	8305777	8305777	8751230	1238475	-1.08712984001613e-05	1	7686539.5	7686539.5	8131992.5	cela1_red_15_7512755	cela1_red_15_8751230
LG1.b.101.20	Both	-2818.06122985631	-2817.87647768098	1	101	20	120	101	7703161	7703161	8148614	120	8899697	8899697	9345150	1196536	0.369504350659554	0.543274563502158	8301429	8301429	8746882	cela1_red_15_8148614	cela1_red_15_9345150
LG1.b.101.20	Male	-884.662525414572	-884.347643408368	1	101	20	120	101	7703161	7703161	8148614	120	8899697	8899697	9345150	1196536	0.629764012408486	0.427441888896939	8301429	8301429	8746882	cela1_red_15_8148614	cela1_red_15_9345150
LG1.b.101.20	Female	-1896.56305066561	-1896.56305339896	1	101	20	120	101	7703161	7703161	8148614	120	8899697	8899697	9345150	1196536	-5.46669616596773e-06	1	8301429	8301429	8746882	cela1_red_15_8148614	cela1_red_15_9345150
LG1.b.111.20	Both	-2818.04912771444	-2818.04913312084	1	111	20	130	111	8316214	8316214	8761667	130	9831839	9831839	10277292	1515625	-1.08128106148797e-05	1	9074026.5	9074026.5	9519479.5	cela1_red_15_8761667	cela1_red_15_10277292
LG1.b.111.20	Male	-884.660035225975	-884.660040670054	1	111	20	130	111	8316214	8316214	8761667	130	9831839	9831839	10277292	1515625	-1.08881574760744e-05	1	9074026.5	9074026.5	9519479.5	cela1_red_15_8761667	cela1_red_15_10277292
LG1.b.111.20	Female	-1896.56250795492	-1896.56251197148	1	111	20	130	111	8316214	8316214	8761667	130	9831839	9831839	10277292	1515625	-8.03312741481932e-06	1	9074026.5	9074026.5	9519479.5	cela1_red_15_8761667	cela1_red_15_10277292
LG1.b.121.20	Both	-2818.04271592817	-2818.04272699602	1	121	20	140	121	8998142	8998142	9443595	140	10190429	10190429	10635882	1192287	-2.21356895053759e-05	1	9594285.5	9594285.5	10039738.5	cela1_red_15_9443595	cela1_red_15_10635882
LG1.b.121.20	Male	-884.662010249727	-884.631193184472	1	121	20	140	121	8998142	8998142	9443595	140	10190429	10190429	10635882	1192287	0.0616341305117203	0.803931527177238	9594285.5	9594285.5	10039738.5	cela1_red_15_9443595	cela1_red_15_10635882
LG1.b.121.20	Female	-1896.56189629558	-1896.56190111622	1	121	20	140	121	8998142	8998142	9443595	140	10190429	10190429	10635882	1192287	-9.64127957558958e-06	1	9594285.5	9594285.5	10039738.5	cela1_red_15_9443595	cela1_red_15_10635882
LG1.b.131.20	Both	-2818.05526472339	-2818.05526509468	1	131	20	150	131	9842832	9842832	10288285	150	10833638	10833638	11279091	990806	-7.42581505619455e-07	1	10338235	10338235	10783688	cela1_red_15_10288285	cela1_sika_15_11279091
LG1.b.131.20	Male	-884.664132528789	-884.039081907609	1	131	20	150	131	9842832	9842832	10288285	150	10833638	10833638	11279091	990806	1.25010124235951	0.263533141423525	10338235	10338235	10783688	cela1_red_15_10288285	cela1_sika_15_11279091
LG1.b.131.20	Female	-1896.56769049533	-1896.56039067411	1	131	20	150	131	9842832	9842832	10288285	150	10833638	10833638	11279091	990806	0.0145996424407713	0.903826495439805	10338235	10338235	10783688	cela1_red_15_10288285	cela1_sika_15_11279091
LG1.b.141.20	Both	-2818.06809091999	-2817.73523458685	1	141	20	160	141	10207357	10207357	10652810	160	11359177	11359177	11804630	1151820	0.665712666275795	0.414550372104276	10783267	10783267	11228720	cela1_red_15_10652810	cela1_red_15_11804630
LG1.b.141.20	Male	-884.664099792559	-883.50804209741	1	141	20	160	141	10207357	10207357	10652810	160	11359177	11359177	11804630	1151820	2.31211539029732	0.12836924438353	10783267	10783267	11228720	cela1_red_15_10652810	cela1_red_15_11804630
LG1.b.141.20	Female	-1896.57371681334	-1896.272964971	1	141	20	160	141	10207357	10207357	10652810	160	11359177	11359177	11804630	1151820	0.601503684677482	0.438004876725088	10783267	10783267	11228720	cela1_red_15_10652810	cela1_red_15_11804630
LG1.b.151.20	Both	-2818.06246710731	-2817.90441107164	1	151	20	170	151	10969594	10969594	11415047	170	12139150	12139150	12584603	1169556	0.316112071347561	0.573953569650666	11554372	11554372	11999825	cela1_red_15_11415047	cela1_red_15_12584603
LG1.b.151.20	Male	-884.6640099174	-883.464959258631	1	151	20	170	151	10969594	10969594	11415047	170	12139150	12139150	12584603	1169556	2.39810131753893	0.121482615749935	11554372	11554372	11999825	cela1_red_15_11415047	cela1_red_15_12584603
LG1.b.151.20	Female	-1896.56819244025	-1896.54902140503	1	151	20	170	151	10969594	10969594	11415047	170	12139150	12139150	12584603	1169556	0.0383420704310993	0.844757854729171	11554372	11554372	11999825	cela1_red_15_11415047	cela1_red_15_12584603
LG1.b.161.20	Both	-2818.04720728959	-2818.04721310782	1	161	20	180	161	11416601	11416601	11862054	180	12880421	12880421	13325874	1463820	-1.16364635687205e-05	1	12148511	12148511	12593964	cela1_red_15_11862054	cela1_red_15_13325874
LG1.b.161.20	Male	-884.661843413552	-884.521215109427	1	161	20	180	161	11416601	11416601	11862054	180	12880421	12880421	13325874	1463820	0.28125660825026	0.59587877165321	12148511	12148511	12593964	cela1_red_15_11862054	cela1_red_15_13325874
LG1.b.161.20	Female	-1896.5585499408	-1896.55855680062	1	161	20	180	161	11416601	11416601	11862054	180	12880421	12880421	13325874	1463820	-1.37196270770801e-05	1	12148511	12148511	12593964	cela1_red_15_11862054	cela1_red_15_13325874
LG1.b.171.20	Both	-2818.04969328483	-2818.04970064632	1	171	20	190	171	12293262	12293262	12738715	190	13672159	13672159	14117612	1378897	-1.47229839058127e-05	1	12982710.5	12982710.5	13428163.5	cela1_red_15_12738715	cela1_red_15_14117612
LG1.b.171.20	Male	-884.659735875719	-884.659737628664	1	171	20	190	171	12293262	12293262	12738715	190	13672159	13672159	14117612	1378897	-3.50589016306913e-06	1	12982710.5	12982710.5	13428163.5	cela1_red_15_12738715	cela1_red_15_14117612
LG1.b.171.20	Female	-1896.56211094606	-1896.56211424338	1	171	20	190	171	12293262	12293262	12738715	190	13672159	13672159	14117612	1378897	-6.59463785268599e-06	1	12982710.5	12982710.5	13428163.5	cela1_red_15_12738715	cela1_red_15_14117612
LG1.b.181.20	Both	-2818.07895069347	-2817.12068607987	1	181	20	200	181	13070632	13070632	13516085	200	14384689	14384689	14830142	1314057	1.9165292271955	0.166239781628598	13727660.5	13727660.5	14173113.5	cela1_red_15_13516085	cela1_red_15_14830142
LG1.b.181.20	Male	-884.658905689332	-884.6589084184	1	181	20	200	181	13070632	13070632	13516085	200	14384689	14384689	14830142	1314057	-5.458136456582e-06	1	13727660.5	13727660.5	14173113.5	cela1_red_15_13516085	cela1_red_15_14830142
LG1.b.181.20	Female	-1896.58035600487	-1895.58151007054	1	181	20	200	181	13070632	13070632	13516085	200	14384689	14384689	14830142	1314057	1.9976918686466	0.157538945179646	13727660.5	13727660.5	14173113.5	cela1_red_15_13516085	cela1_red_15_14830142
LG1.b.191.20	Both	-2818.08303837199	-2816.93200300727	1	191	20	210	191	13842095	13842095	14287548	210	14934884	14934884	15380337	1092789	2.30207072943176	0.129201650005371	14388489.5	14388489.5	14833942.5	cela1_red_15_14287548	cela1_red_15_15380337
LG1.b.191.20	Male	-884.660361374419	-884.660362429737	1	191	20	210	191	13842095	13842095	14287548	210	14934884	14934884	15380337	1092789	-2.110635932695e-06	1	14388489.5	14388489.5	14833942.5	cela1_red_15_14287548	cela1_red_15_15380337
LG1.b.191.20	Female	-1896.58132819277	-1895.61233830029	1	191	20	210	191	13842095	13842095	14287548	210	14934884	14934884	15380337	1092789	1.93797978495058	0.163888053874971	14388489.5	14388489.5	14833942.5	cela1_red_15_14287548	cela1_red_15_15380337
LG1.b.201.20	Both	-2818.06122546419	-2817.99138922308	1	201	20	220	201	14420701	14420701	14866154	220	15652310	15652310	16097763	1231609	0.139672482219794	0.708606826563103	15036505.5	15036505.5	15481958.5	cela1_red_15_14866154	cela1_red_15_16097763
LG1.b.201.20	Male	-884.660770470746	-884.660771106718	1	201	20	220	201	14420701	14420701	14866154	220	15652310	15652310	16097763	1231609	-1.2719444839604e-06	1	15036505.5	15036505.5	15481958.5	cela1_red_15_14866154	cela1_red_15_16097763
LG1.b.201.20	Female	-1896.57032691602	-1896.48267770881	1	201	20	220	201	14420701	14420701	14866154	220	15652310	15652310	16097763	1231609	0.175298414414101	0.675445237757566	15036505.5	15036505.5	15481958.5	cela1_red_15_14866154	cela1_red_15_16097763
LG1.b.211.20	Both	-2818.06402216047	-2817.80696183966	1	211	20	230	211	15026398	15026398	15471851	230	16150214	16150214	16595667	1123816	0.514120641613772	0.473360482011674	15588306	15588306	16033759	cela1_red_15_15471851	cela1_red_15_16595667
LG1.b.211.20	Male	-884.660739174198	-884.660739785804	1	211	20	230	211	15026398	15026398	15471851	230	16150214	16150214	16595667	1123816	-1.2232137578394e-06	1	15588306	15588306	16033759	cela1_red_15_15471851	cela1_red_15_16595667
LG1.b.211.20	Female	-1896.57386721185	-1896.09525577857	1	211	20	230	211	15026398	15026398	15471851	230	16150214	16150214	16595667	1123816	0.957222866541088	0.327887567772096	15588306	15588306	16033759	cela1_red_15_15471851	cela1_red_15_16595667
LG1.b.221.20	Both	-2818.05948336101	-2817.8796407885	1	221	20	240	221	15715405	15715405	16160858	240	16681435	16681435	17126888	966030	0.359685145022013	0.548681149894233	16198420	16198420	16643873	cela1_red_15_16160858	cela1_red_15_17126888
LG1.b.221.20	Male	-884.661018295324	-884.661018601165	1	221	20	240	221	15715405	15715405	16160858	240	16681435	16681435	17126888	966030	-6.1168179854576e-07	1	16198420	16198420	16643873	cela1_red_15_16160858	cela1_red_15_17126888
LG1.b.221.20	Female	-1896.56988536768	-1896.25066486772	1	221	20	240	221	15715405	15715405	16160858	240	16681435	16681435	17126888	966030	0.638440999919567	0.42427589808685	16198420	16198420	16643873	cela1_red_15_16160858	cela1_red_15_17126888
LG1.b.231.20	Both	-2818.05224690464	-2818.05225898203	1	231	20	250	231	16182909	16182909	16628362	250	17188118	17188118	17633571	1005209	-2.41547941186582e-05	1	16685513.5	16685513.5	17130966.5	cela1_red_15_16628362	cela1_red_15_17633571
LG1.b.231.20	Male	-884.661079619976	-884.661079781071	1	231	20	250	231	16182909	16182909	16628362	250	17188118	17188118	17633571	1005209	-3.22190771839814e-07	1	16685513.5	16685513.5	17130966.5	cela1_red_15_16628362	cela1_red_15_17633571
LG1.b.231.20	Female	-1896.56852844121	-1896.53538148764	1	231	20	250	231	16182909	16182909	16628362	250	17188118	17188118	17633571	1005209	0.0662939071426081	0.796811315310307	16685513.5	16685513.5	17130966.5	cela1_red_15_16628362	cela1_red_15_17633571
LG1.b.241.20	Both	-2818.05073096299	-2818.05073443862	1	241	20	260	241	16806023	16806023	17251476	260	17770189	17770189	18215642	964166	-6.9512716436293e-06	1	17288106	17288106	17733559	cela1_red_15_17251476	cela1_red_15_18215642
LG1.b.241.20	Male	-884.660823557392	-884.660824003141	1	241	20	260	241	16806023	16806023	17251476	260	17770189	17770189	18215642	964166	-8.91498302735272e-07	1	17288106	17288106	17733559	cela1_red_15_17251476	cela1_red_15_18215642
LG1.b.241.20	Female	-1896.56525188988	-1896.56525303249	1	241	20	260	241	16806023	16806023	17251476	260	17770189	17770189	18215642	964166	-2.28523094847333e-06	1	17288106	17288106	17733559	cela1_red_15_17251476	cela1_red_15_18215642
LG1.b.251.20	Both	-2818.04183869466	-2818.04184809723	1	251	20	270	251	17248277	17248277	17693730	270	18243612	18243612	18689065	995335	-1.8805133549904e-05	1	17745944.5	17745944.5	18191397.5	cela1_red_15_17693730	cela1_red_15_18689065
LG1.b.251.20	Male	-884.659973743946	-884.659975241251	1	251	20	270	251	17248277	17248277	17693730	270	18243612	18243612	18689065	995335	-2.99460907626781e-06	1	17745944.5	17745944.5	18191397.5	cela1_red_15_17693730	cela1_red_15_18689065
LG1.b.251.20	Female	-1896.55852045502	-1896.55852707559	1	251	20	270	251	17248277	17248277	17693730	270	18243612	18243612	18689065	995335	-1.32411464619508e-05	1	17745944.5	17745944.5	18191397.5	cela1_red_15_17693730	cela1_red_15_18689065
LG1.b.261.20	Both	-2818.0415863061	-2818.04159666718	1	261	20	280	261	17786358	17786358	18231811	280	18835728	18835728	19281181	1049370	-2.07221637538169e-05	1	18311043	18311043	18756496	cela1_red_15_18231811	cela1_red_15_19281181
LG1.b.261.20	Male	-884.65910073112	-884.659103640363	1	261	20	280	261	17786358	17786358	18231811	280	18835728	18835728	19281181	1049370	-5.81848530600837e-06	1	18311043	18311043	18756496	cela1_red_15_18231811	cela1_red_15_19281181
LG1.b.261.20	Female	-1896.56163065592	-1896.5616351242	1	261	20	280	261	17786358	17786358	18231811	280	18835728	18835728	19281181	1049370	-8.9365717030887e-06	1	18311043	18311043	18756496	cela1_red_15_18231811	cela1_red_15_19281181
LG1.b.271.20	Both	-2818.04122038655	-2818.04123029633	1	271	20	290	271	18432906	18432906	18878359	290	19490312	19490312	19935765	1057406	-1.98195493794628e-05	1	18961609	18961609	19407062	cela1_red_15_18878359	cela1_red_15_19935765
LG1.b.271.20	Male	-884.660159690157	-884.660161121664	1	271	20	290	271	18432906	18432906	18878359	290	19490312	19490312	19935765	1057406	-2.86301451524196e-06	1	18961609	18961609	19407062	cela1_red_15_18878359	cela1_red_15_19935765
LG1.b.271.20	Female	-1896.56144792983	-1896.56145223002	1	271	20	290	271	18432906	18432906	18878359	290	19490312	19490312	19935765	1057406	-8.60036197991576e-06	1	18961609	18961609	19407062	cela1_red_15_18878359	cela1_red_15_19935765
LG1.b.281.20	Both	-2818.04208684953	-2818.04209666513	1	281	20	300	281	18915602	18915602	19361055	300	20227559	20227559	20673012	1311957	-1.96311930267257e-05	1	19571580.5	19571580.5	20017033.5	cela1_red_15_19361055	cela1_red_15_20673012
LG1.b.281.20	Male	-884.661614987269	-884.631677359807	1	281	20	300	281	18915602	18915602	19361055	300	20227559	20227559	20673012	1311957	0.0598752549240089	0.806693213882256	19571580.5	19571580.5	20017033.5	cela1_red_15_19361055	cela1_red_15_20673012
LG1.b.281.20	Female	-1896.55887905425	-1896.55888579616	1	281	20	300	281	18915602	18915602	19361055	300	20227559	20227559	20673012	1311957	-1.34838137455517e-05	1	19571580.5	19571580.5	20017033.5	cela1_red_15_19361055	cela1_red_15_20673012
LG1.b.291.20	Both	-2818.04183480304	-2818.04184451926	1	291	20	310	291	19519582	19519582	19965035	310	20821919	20821919	21267372	1302337	-1.94324284166214e-05	1	20170750.5	20170750.5	20616203.5	cela1_red_15_19965035	cela1_red_15_21267372
LG1.b.291.20	Male	-884.66042917099	-884.660430349715	1	291	20	310	291	19519582	19519582	19965035	310	20821919	20821919	21267372	1302337	-2.35744960264128e-06	1	20170750.5	20170750.5	20616203.5	cela1_red_15_19965035	cela1_red_15_21267372
LG1.b.291.20	Female	-1896.55550815772	-1896.55551754262	1	291	20	310	291	19519582	19519582	19965035	310	20821919	20821919	21267372	1302337	-1.87697851288249e-05	1	20170750.5	20170750.5	20616203.5	cela1_red_15_19965035	cela1_red_15_21267372
LG1.b.301.20	Both	-2818.04370944101	-2818.04371753414	1	301	20	320	301	20249713	20249713	20695166	320	21387191	21387191	21832644	1137478	-1.61862544700853e-05	1	20818452	20818452	21263905	cela1_red_15_20695166	cela1_red_15_21832644
LG1.b.301.20	Male	-884.661136285157	-884.661136631889	1	301	20	320	301	20249713	20249713	20695166	320	21387191	21387191	21832644	1137478	-6.93464016876533e-07	1	20818452	20818452	21263905	cela1_red_15_20695166	cela1_red_15_21832644
LG1.b.301.20	Female	-1896.55999298559	-1896.55999836898	1	301	20	320	301	20249713	20249713	20695166	320	21387191	21387191	21832644	1137478	-1.07667874544859e-05	1	20818452	20818452	21263905	cela1_red_15_20695166	cela1_red_15_21832644
LG1.b.311.20	Both	-2818.0482109628	-2818.04821589047	1	311	20	330	311	20847796	20847796	21293249	330	22104611	22104611	22550064	1256815	-9.85534188657766e-06	1	21476203.5	21476203.5	21921656.5	cela1_red_15_21293249	cela1_red_15_22550064
LG1.b.311.20	Male	-884.660582109129	-884.660585930926	1	311	20	330	311	20847796	20847796	21293249	330	22104611	22104611	22550064	1256815	-7.64359447202878e-06	1	21476203.5	21476203.5	21921656.5	cela1_red_15_21293249	cela1_red_15_22550064
LG1.b.311.20	Female	-1896.56620667679	-1896.56620693054	1	311	20	330	311	20847796	20847796	21293249	330	22104611	22104611	22550064	1256815	-5.07493950863136e-07	1	21476203.5	21476203.5	21921656.5	cela1_red_15_21293249	cela1_red_15_22550064
LG1.b.321.20	Both	-2818.04896199257	-2818.04896666089	1	321	20	340	321	21433383	21433383	21878836	340	23140530	23140530	23585983	1707147	-9.33664341573603e-06	1	22286956.5	22286956.5	22732409.5	cela1_red_15_21878836	cela1_red_15_23585983
LG1.b.321.20	Male	-884.660033239806	-884.660034820093	1	321	20	340	321	21433383	21433383	21878836	340	23140530	23140530	23585983	1707147	-3.16057366944733e-06	1	22286956.5	22286956.5	22732409.5	cela1_red_15_21878836	cela1_red_15_23585983
LG1.b.321.20	Female	-1896.56678476668	-1896.56588355368	1	321	20	340	321	21433383	21433383	21878836	340	23140530	23140530	23585983	1707147	0.00180242600390557	0.966135993765856	22286956.5	22286956.5	22732409.5	cela1_red_15_21878836	cela1_red_15_23585983
LG1.b.331.20	Both	-2818.04840395056	-2818.04840872401	1	331	20	350	331	22163097	22163097	22608550	350	24051357	24051357	24496810	1888260	-9.54688857746078e-06	1	23107227	23107227	23552680	cela1_red_15_22608550	cela1_red_15_24496810
LG1.b.331.20	Male	-884.661090763592	-884.661090931794	1	331	20	350	331	22163097	22163097	22608550	350	24051357	24051357	24496810	1888260	-3.36403672918095e-07	1	23107227	23107227	23552680	cela1_red_15_22608550	cela1_red_15_24496810
LG1.b.331.20	Female	-1896.56518007394	-1896.56518114525	1	331	20	350	331	22163097	22163097	22608550	350	24051357	24051357	24496810	1888260	-2.14262718145619e-06	1	23107227	23107227	23552680	cela1_red_15_22608550	cela1_red_15_24496810
LG1.b.341.20	Both	-2818.04979445987	-2818.04979902594	1	341	20	360	341	23219916	23219916	23665369	360	24992491	24992491	25437944	1772575	-9.13212079467485e-06	1	24106203.5	24106203.5	24551656.5	cela1_red_15_23665369	cela1_sika_15_25437944
LG1.b.341.20	Male	-884.661271742684	-884.661271735098	1	341	20	360	341	23219916	23219916	23665369	360	24992491	24992491	25437944	1772575	1.51735548570286e-08	0.999901715794808	24106203.5	24106203.5	24551656.5	cela1_red_15_23665369	cela1_sika_15_25437944
LG1.b.341.20	Female	-1896.56266990577	-1896.5626735899	1	341	20	360	341	23219916	23219916	23665369	360	24992491	24992491	25437944	1772575	-7.36825404601404e-06	1	24106203.5	24106203.5	24551656.5	cela1_red_15_23665369	cela1_sika_15_25437944
LG1.b.351.20	Both	-2818.04862289367	-2818.04862877802	1	351	20	370	351	24203249	24203249	24648702	370	25583209	25583209	26028662	1379960	-1.17687022793689e-05	1	24893229	24893229	25338682	cela1_red_15_24648702	cela1_red_15_26028662
LG1.b.351.20	Male	-884.65975901751	-884.659761538289	1	351	20	370	351	24203249	24203249	24648702	370	25583209	25583209	26028662	1379960	-5.04155809721851e-06	1	24893229	24893229	25338682	cela1_red_15_24648702	cela1_red_15_26028662
LG1.b.351.20	Female	-1896.56144511813	-1896.5614503223	1	351	20	370	351	24203249	24203249	24648702	370	25583209	25583209	26028662	1379960	-1.04083269434341e-05	1	24893229	24893229	25338682	cela1_red_15_24648702	cela1_red_15_26028662
LG1.b.361.20	Both	-2818.05071176857	-2818.05071581875	1	361	20	380	361	25020813	25020813	25466266	380	26131619	26131619	26577072	1110806	-8.10036181064788e-06	1	25576216	25576216	26021669	cela1_sika_15_25466266	cela1_red_15_26577072
LG1.b.361.20	Male	-884.659119909503	-884.659123165572	1	361	20	380	361	25020813	25020813	25466266	380	26131619	26131619	26577072	1110806	-6.51213622404612e-06	1	25576216	25576216	26021669	cela1_sika_15_25466266	cela1_red_15_26577072
LG1.b.361.20	Female	-1896.56278421674	-1896.56278785405	1	361	20	380	361	25020813	25020813	25466266	380	26131619	26131619	26577072	1110806	-7.27462065697182e-06	1	25576216	25576216	26021669	cela1_sika_15_25466266	cela1_red_15_26577072
LG1.b.371.20	Both	-2818.05316211713	-2818.05316424341	1	371	20	390	371	25645534	25645534	26090987	390	26684455	26684455	27129908	1038921	-4.25256985181477e-06	1	26164994.5	26164994.5	26610447.5	cela1_red_15_26090987	cela1_red_15_27129908
LG1.b.371.20	Male	-884.660760929576	-884.660761513918	1	371	20	390	371	25645534	25645534	26090987	390	26684455	26684455	27129908	1038921	-1.16868272925785e-06	1	26164994.5	26164994.5	26610447.5	cela1_red_15_26090987	cela1_red_15_27129908
LG1.b.371.20	Female	-1896.5626625945	-1896.56266605377	1	371	20	390	371	25645534	25645534	26090987	390	26684455	26684455	27129908	1038921	-6.91854211254395e-06	1	26164994.5	26164994.5	26610447.5	cela1_red_15_26090987	cela1_red_15_27129908
LG1.b.381.20	Both	-2818.05701865253	-2818.04880915745	1	381	20	400	381	26147684	26147684	26593137	400	27264869	27264869	27710322	1117185	0.0164189901724967	0.898040866256061	26706276.5	26706276.5	27151729.5	cela1_red_15_26593137	cela1_red_15_27710322
LG1.b.381.20	Male	-884.661202056567	-884.661202165463	1	381	20	400	381	26147684	26147684	26593137	400	27264869	27264869	27710322	1117185	-2.17791466639028e-07	1	26706276.5	26706276.5	27151729.5	cela1_red_15_26593137	cela1_red_15_27710322
LG1.b.381.20	Female	-1896.56292451832	-1896.56292784743	1	381	20	400	381	26147684	26147684	26593137	400	27264869	27264869	27710322	1117185	-6.65822699374985e-06	1	26706276.5	26706276.5	27151729.5	cela1_red_15_26593137	cela1_red_15_27710322
LG1.b.391.20	Both	-2818.05283536932	-2818.0528472901	1	391	20	410	391	26744215	26744215	27189668	410	27675899	27675899	28121352	931684	-2.38415577769047e-05	1	27210057	27210057	27655510	cela1_red_15_27189668	cela1_red_15_28121352
LG1.b.391.20	Male	-884.660438031517	-884.660439258955	1	391	20	410	391	26744215	26744215	27189668	410	27675899	27675899	28121352	931684	-2.4548755845899e-06	1	27210057	27210057	27655510	cela1_red_15_27189668	cela1_red_15_28121352
LG1.b.391.20	Female	-1896.56107905071	-1896.56108434693	1	391	20	410	391	26744215	26744215	27189668	410	27675899	27675899	28121352	931684	-1.05924473245977e-05	1	27210057	27210057	27655510	cela1_red_15_27189668	cela1_red_15_28121352
LG1.b.401.20	Both	-2818.04007227129	-2818.04008488705	1	401	20	420	401	27313106	27313106	27758559	420	28316609	28316609	28762062	1003503	-2.52315303441719e-05	1	27814857.5	27814857.5	28260310.5	cela1_red_15_27758559	cela1_red_15_28762062
LG1.b.401.20	Male	-884.65962321036	-884.659625818872	1	401	20	420	401	27313106	27313106	27758559	420	28316609	28316609	28762062	1003503	-5.21702349942643e-06	1	27814857.5	27814857.5	28260310.5	cela1_red_15_27758559	cela1_red_15_28762062
LG1.b.401.20	Female	-1896.55583981999	-1896.55585032851	1	401	20	420	401	27313106	27313106	27758559	420	28316609	28316609	28762062	1003503	-2.10170428545098e-05	1	27814857.5	27814857.5	28260310.5	cela1_red_15_27758559	cela1_red_15_28762062
LG1.b.411.20	Both	-2818.04075408748	-2818.04076598912	1	411	20	430	411	27704342	27704342	28149795	430	29010139	29010139	29455592	1305797	-2.38032916968223e-05	1	28357240.5	28357240.5	28802693.5	cela1_red_15_28149795	cela1_red_15_29455592
LG1.b.411.20	Male	-884.65985599204	-884.659858286167	1	411	20	430	411	27704342	27704342	28149795	430	29010139	29010139	29455592	1305797	-4.58825365967641e-06	1	28357240.5	28357240.5	28802693.5	cela1_red_15_28149795	cela1_red_15_29455592
LG1.b.411.20	Female	-1896.55730445052	-1896.55731340654	1	411	20	430	411	27704342	27704342	28149795	430	29010139	29010139	29455592	1305797	-1.79120570464875e-05	1	28357240.5	28357240.5	28802693.5	cela1_red_15_28149795	cela1_red_15_29455592
LG1.b.421.20	Both	-2818.04920722305	-2818.04921212506	1	421	20	440	421	28356440	28356440	28801893	440	29598190	29598190	30043643	1241750	-9.8040127340937e-06	1	28977315	28977315	29422768	cela1_red_15_28801893	cela1_red_15_30043643
LG1.b.421.20	Male	-884.659552865405	-884.659555461577	1	421	20	440	421	28356440	28356440	28801893	440	29598190	29598190	30043643	1241750	-5.1923427690781e-06	1	28977315	28977315	29422768	cela1_red_15_28801893	cela1_red_15_30043643
LG1.b.421.20	Female	-1896.5641288005	-1896.56413104454	1	421	20	440	421	28356440	28356440	28801893	440	29598190	29598190	30043643	1241750	-4.48808759756503e-06	1	28977315	28977315	29422768	cela1_red_15_28801893	cela1_red_15_30043643
LG1.b.431.20	Both	-2818.05004733063	-2818.05005136218	1	431	20	450	431	29271357	29271357	29716810	450	30077236	30077236	30522689	805879	-8.06311072665267e-06	1	29674296.5	29674296.5	30119749.5	cela1_red_15_29716810	cela1_red_15_30522689
LG1.b.431.20	Male	-884.659332657447	-884.659335895385	1	431	20	450	431	29271357	29271357	29716810	450	30077236	30077236	30522689	805879	-6.47587648927583e-06	1	29674296.5	29674296.5	30119749.5	cela1_red_15_29716810	cela1_red_15_30522689
LG1.b.431.20	Female	-1896.56300756318	-1896.56301721188	1	431	20	450	431	29271357	29271357	29716810	450	30077236	30077236	30522689	805879	-1.92974025594594e-05	1	29674296.5	29674296.5	30119749.5	cela1_red_15_29716810	cela1_red_15_30522689
LG1.b.441.20	Both	-2818.04568877192	-2818.04572119656	1	441	20	460	441	29659995	29659995	30105448	460	30545451	30545451	30990904	885456	-6.48492668915424e-05	1	30102723	30102723	30548176	cela1_red_15_30105448	cela1_red_15_30990904
LG1.b.441.20	Male	-884.659241220436	-884.659244868862	1	441	20	460	441	29659995	29659995	30105448	460	30545451	30545451	30990904	885456	-7.2968509812199e-06	1	30102723	30102723	30548176	cela1_red_15_30105448	cela1_red_15_30990904
LG1.b.441.20	Female	-1896.55992849488	-1896.55995045354	1	441	20	460	441	29659995	29659995	30105448	460	30545451	30545451	30990904	885456	-4.39173236372881e-05	1	30102723	30102723	30548176	cela1_red_15_30105448	cela1_red_15_30990904
LG1.b.451.20	Both	-2818.04906088021	-2818.0490770759	1	451	20	470	451	30132505	30132505	30577958	470	31358401	31358401	31803854	1225896	-3.23913800457376e-05	1	30745453	30745453	31190906	cela1_red_15_30577958	cela1_red_15_31803854
LG1.b.451.20	Male	-884.658616467052	-884.658621010952	1	451	20	470	451	30132505	30132505	30577958	470	31358401	31358401	31803854	1225896	-9.0877997536154e-06	1	30745453	30745453	31190906	cela1_red_15_30577958	cela1_red_15_31803854
LG1.b.451.20	Female	-1896.56539195651	-1896.56539736116	1	451	20	470	451	30132505	30132505	30577958	470	31358401	31358401	31803854	1225896	-1.08092990558362e-05	1	30745453	30745453	31190906	cela1_red_15_30577958	cela1_red_15_31803854
LG1.b.461.20	Both	-2818.04596018931	-2818.04596642115	1	461	20	480	461	30553807	30553807	30999260	480	31878172	31878172	32323625	1324365	-1.2463691746234e-05	1	31215989.5	31215989.5	31661442.5	cela1_red_15_30999260	cela1_red_15_32323625
LG1.b.461.20	Male	-884.65858193463	-884.658585648783	1	461	20	480	461	30553807	30553807	30999260	480	31878172	31878172	32323625	1324365	-7.42830570743536e-06	1	31215989.5	31215989.5	31661442.5	cela1_red_15_30999260	cela1_red_15_32323625
LG1.b.461.20	Female	-1896.56523115067	-1896.56523159393	1	461	20	480	461	30553807	30553807	30999260	480	31878172	31878172	32323625	1324365	-8.86519501364091e-07	1	31215989.5	31215989.5	31661442.5	cela1_red_15_30999260	cela1_red_15_32323625
LG1.b.471.20	Both	-2818.04446787234	-2818.04447547482	1	471	20	490	471	31537200	31537200	31982653	490	32245866	32245866	32691319	708666	-1.52049415191868e-05	1	31891533	31891533	32336986	cela1_red_15_31982653	cela1_red_15_32691319
LG1.b.471.20	Male	-884.658676084456	-884.658679583818	1	471	20	490	471	31537200	31537200	31982653	490	32245866	32245866	32691319	708666	-6.99872498444165e-06	1	31891533	31891533	32336986	cela1_red_15_31982653	cela1_red_15_32691319
LG1.b.471.20	Female	-1896.56157784853	-1896.5615819774	1	471	20	490	471	31537200	31537200	31982653	490	32245866	32245866	32691319	708666	-8.25773668111651e-06	1	31891533	31891533	32336986	cela1_red_15_31982653	cela1_red_15_32691319
LG1.b.481.20	Both	-2818.04546107989	-2818.04550393605	1	481	20	500	481	31935405	31935405	32380858	500	32883100	32883100	33328553	947695	-8.57123177411268e-05	1	32409252.5	32409252.5	32854705.5	cela1_red_15_32380858	cela1_red_15_33328553
LG1.b.481.20	Male	-884.659363975001	-884.659366773075	1	481	20	500	481	31935405	31935405	32380858	500	32883100	32883100	33328553	947695	-5.59614727535518e-06	1	32409252.5	32409252.5	32854705.5	cela1_red_15_32380858	cela1_red_15_33328553
LG1.b.481.20	Female	-1896.55953732233	-1896.55955611032	1	481	20	500	481	31935405	31935405	32380858	500	32883100	32883100	33328553	947695	-3.75759741473303e-05	1	32409252.5	32409252.5	32854705.5	cela1_red_15_32380858	cela1_red_15_33328553
LG1.b.491.20	Both	-2818.049776478	-2818.04978189055	1	491	20	510	491	32353876	32353876	32799329	510	33780448	33780448	34225901	1426572	-1.08251069832477e-05	1	33067162	33067162	33512615	cela1_red_15_32799329	cela1_red_15_34225901
LG1.b.491.20	Male	-884.660575654998	-884.66057706474	1	491	20	510	491	32353876	32353876	32799329	510	33780448	33780448	34225901	1426572	-2.81948450719938e-06	1	33067162	33067162	33512615	cela1_red_15_32799329	cela1_red_15_34225901
LG1.b.491.20	Female	-1896.56471261046	-1896.56471467038	1	491	20	510	491	32353876	32353876	32799329	510	33780448	33780448	34225901	1426572	-4.11983501180657e-06	1	33067162	33067162	33512615	cela1_red_15_32799329	cela1_red_15_34225901
LG1.b.501.20	Both	-2818.05135595856	-2818.05136880257	1	501	20	520	501	32994360	32994360	33439813	520	34724223	34724223	35169676	1729863	-2.56880366578116e-05	1	33859291.5	33859291.5	34304744.5	cela1_red_15_33439813	cela1_red_15_35169676
LG1.b.501.20	Male	-884.662407136206	-884.283220261039	1	501	20	520	501	32994360	32994360	33439813	520	34724223	34724223	35169676	1729863	0.758373750333703	0.383837932935405	33859291.5	33859291.5	34304744.5	cela1_red_15_33439813	cela1_red_15_35169676
LG1.b.501.20	Female	-1896.56481811479	-1896.56481938904	1	501	20	520	501	32994360	32994360	33439813	520	34724223	34724223	35169676	1729863	-2.54848646363826e-06	1	33859291.5	33859291.5	34304744.5	cela1_red_15_33439813	cela1_red_15_35169676
LG1.b.511.20	Both	-2818.04183626409	-2818.04184654858	1	511	20	530	511	33781714	33781714	34227167	530	35593861	35593861	36039314	1812147	-2.05689702852396e-05	1	34687787.5	34687787.5	35133240.5	cela1_red_15_34227167	cela1_red_15_36039314
LG1.b.511.20	Male	-884.662286667499	-884.309742114688	1	511	20	530	511	33781714	33781714	34227167	530	35593861	35593861	36039314	1812147	0.705089105623074	0.401078946415217	34687787.5	34687787.5	35133240.5	cela1_red_15_34227167	cela1_red_15_36039314
LG1.b.511.20	Female	-1896.55659098426	-1896.55660002246	1	511	20	530	511	33781714	33781714	34227167	530	35593861	35593861	36039314	1812147	-1.80763968273823e-05	1	34687787.5	34687787.5	35133240.5	cela1_red_15_34227167	cela1_red_15_36039314
LG1.b.521.20	Both	-2818.04163694664	-2818.04164814357	1	521	20	540	521	34828312	34828312	35273765	540	36043277	36043277	36488730	1214965	-2.23938550334424e-05	1	35435794.5	35435794.5	35881247.5	cela1_red_15_35273765	cela1_red_15_36488730
LG1.b.521.20	Male	-884.662255383005	-884.525661874941	1	521	20	540	521	34828312	34828312	35273765	540	36043277	36043277	36488730	1214965	0.273187016129441	0.601201863005312	35435794.5	35435794.5	35881247.5	cela1_red_15_35273765	cela1_red_15_36488730
LG1.b.521.20	Female	-1896.55641770008	-1896.55642758533	1	521	20	540	521	34828312	34828312	35273765	540	36043277	36043277	36488730	1214965	-1.97704916899966e-05	1	35435794.5	35435794.5	35881247.5	cela1_red_15_35273765	cela1_red_15_36488730
LG1.b.531.20	Both	-2818.04715609165	-2818.04716255765	1	531	20	550	531	35615669	35615669	36061122	550	36795806	36795806	37241259	1180137	-1.29319905681768e-05	1	36205737.5	36205737.5	36651190.5	cela1_red_15_36061122	cela1_red_15_37241259
LG1.b.531.20	Male	-884.662132709206	-884.507403841076	1	531	20	550	531	35615669	35615669	36061122	550	36795806	36795806	37241259	1180137	0.309457736260583	0.578013130780005	36205737.5	36205737.5	36651190.5	cela1_red_15_36061122	cela1_red_15_37241259
LG1.b.531.20	Female	-1896.56052376375	-1896.56052934884	1	531	20	550	531	35615669	35615669	36061122	550	36795806	36795806	37241259	1180137	-1.11701924652152e-05	1	36205737.5	36205737.5	36651190.5	cela1_red_15_36061122	cela1_red_15_37241259
LG1.b.541.20	Both	-2818.05743069686	-2818.05055584984	1	541	20	560	541	36119882	36119882	36565335	560	38031003	38031003	38476456	1911121	0.0137496940469646	0.906654743251091	37075442.5	37075442.5	37520895.5	cela1_red_15_36565335	cela1_red_15_38476456
LG1.b.541.20	Male	-884.660350326637	-884.660352337902	1	541	20	560	541	36119882	36119882	36565335	560	38031003	38031003	38476456	1911121	-4.02252953790594e-06	1	37075442.5	37075442.5	37520895.5	cela1_red_15_36565335	cela1_red_15_38476456
LG1.b.541.20	Female	-1896.56663320774	-1896.56663327182	1	541	20	560	541	36119882	36119882	36565335	560	38031003	38031003	38476456	1911121	-1.28161900647683e-07	1	37075442.5	37075442.5	37520895.5	cela1_red_15_36565335	cela1_red_15_38476456
LG1.b.551.20	Both	-2818.0600403583	-2818.02250088245	1	551	20	570	551	36898131	36898131	37343584	570	38498126	38498126	38943579	1599995	0.0750789517069279	0.784080482370037	37698128.5	37698128.5	38143581.5	cela1_red_15_37343584	cela1_red_15_38943579
LG1.b.551.20	Male	-884.659658274215	-884.659660791812	1	551	20	570	551	36898131	36898131	37343584	570	38498126	38498126	38943579	1599995	-5.03519322592183e-06	1	37698128.5	37698128.5	38143581.5	cela1_red_15_37343584	cela1_red_15_38943579
LG1.b.551.20	Female	-1896.56668598731	-1896.56662561269	1	551	20	570	551	36898131	36898131	37343584	570	38498126	38498126	38943579	1599995	0.000120749253710528	0.991232544927705	37698128.5	37698128.5	38143581.5	cela1_red_15_37343584	cela1_red_15_38943579
LG1.b.561.20	Both	-2818.05677232067	-2818.05559568471	1	561	20	580	561	38051533	38051533	38496986	580	39097654	39097654	39543107	1046121	0.00235327193695412	0.961309369179022	38574593.5	38574593.5	39020046.5	cela1_red_15_38496986	cela1_red_15_39543107
LG1.b.561.20	Male	-884.660874683719	-884.660875418931	1	561	20	580	561	38051533	38051533	38496986	580	39097654	39097654	39543107	1046121	-1.47042419484933e-06	1	38574593.5	38574593.5	39020046.5	cela1_red_15_38496986	cela1_red_15_39543107
LG1.b.561.20	Female	-1896.56462513929	-1896.5646270296	1	561	20	580	561	38051533	38051533	38496986	580	39097654	39097654	39543107	1046121	-3.7806089494552e-06	1	38574593.5	38574593.5	39020046.5	cela1_red_15_38496986	cela1_red_15_39543107
LG1.b.571.20	Both	-2818.06523999555	-2817.7678425096	1	571	20	590	571	38611354	38611354	39056807	590	40067096	40067096	40512549	1455742	0.59479497189659	0.440570899876386	39339225	39339225	39784678	cela1_red_15_39056807	cela1_red_15_40512549
LG1.b.571.20	Male	-884.66137163382	-884.658520095267	1	571	20	590	571	38611354	38611354	39056807	590	40067096	40067096	40512549	1455742	0.00570307710586349	0.939802003473181	39339225	39339225	39784678	cela1_red_15_39056807	cela1_red_15_40512549
LG1.b.571.20	Female	-1896.56709771621	-1896.56542494915	1	571	20	590	571	38611354	38611354	39056807	590	40067096	40067096	40512549	1455742	0.00334553411175875	0.953875604345812	39339225	39339225	39784678	cela1_red_15_39056807	cela1_red_15_40512549
LG1.b.581.20	Both	-2818.07448466199	-2817.35014138609	1	581	20	600	581	39215190	39215190	39660643	600	40498684	40498684	40944137	1283494	1.44868655181381	0.228738823343085	39856937	39856937	40302390	cela1_red_15_39660643	cela1_red_15_40944137
LG1.b.581.20	Male	-884.661621275854	-884.652033359041	1	581	20	600	581	39215190	39215190	39660643	600	40498684	40498684	40944137	1283494	0.0191758336263774	0.889863576801741	39856937	39856937	40302390	cela1_red_15_39660643	cela1_red_15_40944137
LG1.b.581.20	Female	-1896.56853186619	-1896.54517516057	1	581	20	600	581	39215190	39215190	39660643	600	40498684	40498684	40944137	1283494	0.0467134112464009	0.828884189888991	39856937	39856937	40302390	cela1_red_15_39660643	cela1_red_15_40944137
LG1.b.591.20	Both	-2818.06415298084	-2817.86295571206	1	591	20	610	591	40115456	40115456	40560909	610	41156207	41156207	41601660	1040751	0.402394537549299	0.525855201932748	40635831.5	40635831.5	41081284.5	cela1_red_15_40560909	cela1_red_15_41601660
LG1.b.591.20	Male	-884.660880467272	-884.66088343753	1	591	20	610	591	40115456	40115456	40560909	610	41156207	41156207	41601660	1040751	-5.9405163028714e-06	1	40635831.5	40635831.5	41081284.5	cela1_red_15_40560909	cela1_red_15_41601660
LG1.b.591.20	Female	-1896.56588058938	-1896.56588095541	1	591	20	610	591	40115456	40115456	40560909	610	41156207	41156207	41601660	1040751	-7.32071384845767e-07	1	40635831.5	40635831.5	41081284.5	cela1_red_15_40560909	cela1_red_15_41601660
LG1.b.601.20	Both	-2818.05028190505	-2818.05028965059	1	601	20	620	601	40550208	40550208	40995661	620	41711850	41711850	42157303	1161642	-1.54910831042798e-05	1	41131029	41131029	41576482	cela1_red_15_40995661	cela1_red_15_42157303
LG1.b.601.20	Male	-884.6592460903	-884.659249491818	1	601	20	620	601	40550208	40550208	40995661	620	41711850	41711850	42157303	1161642	-6.80303628541878e-06	1	41131029	41131029	41576482	cela1_red_15_40995661	cela1_red_15_42157303
LG1.b.601.20	Female	-1896.56249336885	-1896.5624977037	1	601	20	620	601	40550208	40550208	40995661	620	41711850	41711850	42157303	1161642	-8.66970958668389e-06	1	41131029	41131029	41576482	cela1_red_15_40995661	cela1_red_15_42157303
LG1.b.611.20	Both	-2818.0539718176	-2818.05397356759	1	611	20	630	611	41176683	41176683	41622136	630	42378639	42378639	42824092	1201956	-3.49998845194932e-06	1	41777661	41777661	42223114	cela1_red_15_41622136	cela1_red_15_42824092
LG1.b.611.20	Male	-884.65942439001	-884.659427399053	1	611	20	630	611	41176683	41176683	41622136	630	42378639	42378639	42824092	1201956	-6.01808642386459e-06	1	41777661	41777661	42223114	cela1_red_15_41622136	cela1_red_15_42824092
LG1.b.611.20	Female	-1896.56465691744	-1896.56465901785	1	611	20	630	611	41176683	41176683	41622136	630	42378639	42378639	42824092	1201956	-4.20081596530508e-06	1	41777661	41777661	42223114	cela1_red_15_41622136	cela1_red_15_42824092
LG1.b.621.20	Both	-2818.05427354181	-2818.05427490653	1	621	20	640	621	41741533	41741533	42186986	640	42887499	42887499	43332952	1145966	-2.72944635071326e-06	1	42314516	42314516	42759969	cela1_red_15_42186986	cela1_red_15_43332952
LG1.b.621.20	Male	-884.663691873632	-884.320898524895	1	621	20	640	621	41741533	41741533	42186986	640	42887499	42887499	43332952	1145966	0.685586697475173	0.407669577400277	42314516	42314516	42759969	cela1_red_15_42186986	cela1_red_15_43332952
LG1.b.621.20	Female	-1896.56565378363	-1896.56565467946	1	621	20	640	621	41741533	41741533	42186986	640	42887499	42887499	43332952	1145966	-1.79165272129467e-06	1	42314516	42314516	42759969	cela1_red_15_42186986	cela1_red_15_43332952
LG1.b.631.20	Both	-2818.04779039207	-2818.04779714136	1	631	20	650	631	42391959	42391959	42837412	650	43309083	43309083	43754536	917124	-1.34985821205191e-05	1	42850521	42850521	43295974	cela1_red_15_42837412	cela1_red_15_43754536
LG1.b.631.20	Male	-884.663951986841	-884.267128740524	1	631	20	650	631	42391959	42391959	42837412	650	43309083	43309083	43754536	917124	0.793646492633798	0.372999778788545	42850521	42850521	43295974	cela1_red_15_42837412	cela1_red_15_43754536
LG1.b.631.20	Female	-1896.56196487363	-1896.56197053244	1	631	20	650	631	42391959	42391959	42837412	650	43309083	43309083	43754536	917124	-1.13176010927418e-05	1	42850521	42850521	43295974	cela1_red_15_42837412	cela1_red_15_43754536
LG1.b.641.20	Both	-2818.04306388999	-2818.04307407037	1	641	20	660	641	42900158	42900158	43345611	660	44063967	44063967	44509420	1163809	-2.03607642106363e-05	1	43482062.5	43482062.5	43927515.5	cela1_red_15_43345611	cela1_red_15_44509420
LG1.b.641.20	Male	-884.66174487308	-884.617972981674	1	641	20	660	641	42900158	42900158	43345611	660	44063967	44063967	44509420	1163809	0.0875437828130998	0.767323263113455	43482062.5	43482062.5	43927515.5	cela1_red_15_43345611	cela1_red_15_44509420
LG1.b.641.20	Female	-1896.55929611371	-1896.55930322425	1	641	20	660	641	42900158	42900158	43345611	660	44063967	44063967	44509420	1163809	-1.42210865305969e-05	1	43482062.5	43482062.5	43927515.5	cela1_red_15_43345611	cela1_red_15_44509420
LG1.b.651.20	Both	-2818.0447459599	-2818.04475434546	1	651	20	670	651	43379336	43379336	43824789	670	44746984	44746984	45192437	1367648	-1.67711241374491e-05	1	44063160	44063160	44508613	cela1_red_15_43824789	cela1_red_15_45192437
LG1.b.651.20	Male	-884.664299729168	-884.278288692551	1	651	20	670	651	43379336	43379336	43824789	670	44746984	44746984	45192437	1367648	0.772022073233984	0.379592233811051	44063160	44063160	44508613	cela1_red_15_43824789	cela1_red_15_45192437
LG1.b.651.20	Female	-1896.55914145584	-1896.55914831957	1	651	20	670	651	43379336	43379336	43824789	670	44746984	44746984	45192437	1367648	-1.37274432745471e-05	1	44063160	44063160	44508613	cela1_red_15_43824789	cela1_red_15_45192437
LG1.b.661.20	Both	-2818.04741147942	-2818.0474186233	1	661	20	680	661	44168666	44168666	44614119	680	45220015	45220015	45665468	1051349	-1.4287764315668e-05	1	44694340.5	44694340.5	45139793.5	cela1_red_15_44614119	cela1_red_15_45665468
LG1.b.661.20	Male	-884.66367147524	-884.353346487712	1	661	20	680	661	44168666	44168666	44614119	680	45220015	45220015	45665468	1051349	0.620649975055812	0.430805853710756	44694340.5	44694340.5	45139793.5	cela1_red_15_44614119	cela1_red_15_45665468
LG1.b.661.20	Female	-1896.55992785592	-1896.55993478268	1	661	20	680	661	44168666	44168666	44614119	680	45220015	45220015	45665468	1051349	-1.38535156111175e-05	1	44694340.5	44694340.5	45139793.5	cela1_red_15_44614119	cela1_red_15_45665468
LG1.b.671.20	Both	-2818.04671849634	-2818.0467264799	1	671	20	690	671	44782620	44782620	45228073	690	45609595	45609595	46055048	826975	-1.59671062647249e-05	1	45196107.5	45196107.5	45641560.5	cela1_red_15_45228073	cela1_sika_15_46055048
LG1.b.671.20	Male	-884.661450783452	-884.654925236849	1	671	20	690	671	44782620	44782620	45228073	690	45609595	45609595	46055048	826975	0.0130510932062862	0.909046449070609	45196107.5	45196107.5	45641560.5	cela1_red_15_45228073	cela1_sika_15_46055048
LG1.b.671.20	Female	-1896.56408209853	-1896.56408480322	1	671	20	690	671	44782620	44782620	45228073	690	45609595	45609595	46055048	826975	-5.40937753612525e-06	1	45196107.5	45196107.5	45641560.5	cela1_red_15_45228073	cela1_sika_15_46055048
LG1.b.681.20	Both	-2818.04622109748	-2818.04622976568	1	681	20	700	681	45226435	45226435	45671888	700	47077056	47077056	47522509	1850621	-1.73364178408519e-05	1	46151745.5	46151745.5	46597198.5	cela1_red_15_45671888	cela1_red_15_47522509
LG1.b.681.20	Male	-884.659658337775	-884.659661179177	1	681	20	700	681	45226435	45226435	45671888	700	47077056	47077056	47522509	1850621	-5.68280347579275e-06	1	46151745.5	46151745.5	46597198.5	cela1_red_15_45671888	cela1_red_15_47522509
LG1.b.681.20	Female	-1896.56982961411	-1896.53141353977	1	681	20	700	681	45226435	45226435	45671888	700	47077056	47077056	47522509	1850621	0.0768321486880268	0.781637191929033	46151745.5	46151745.5	46597198.5	cela1_red_15_45671888	cela1_red_15_47522509
LG1.b.691.20	Both	-2818.05007784422	-2818.05008269429	1	691	20	710	691	45609623	45609623	46055076	710	47969126	47969126	48414579	2359503	-9.70013843470952e-06	1	46789374.5	46789374.5	47234827.5	cela1_red_15_46055076	cela1_sika_15_48414579
LG1.b.691.20	Male	-884.659843914479	-884.659846114872	1	691	20	710	691	45609623	45609623	46055076	710	47969126	47969126	48414579	2359503	-4.40078724750492e-06	1	46789374.5	46789374.5	47234827.5	cela1_red_15_46055076	cela1_sika_15_48414579
LG1.b.691.20	Female	-1896.57046139083	-1896.49800806332	1	691	20	710	691	45609623	45609623	46055076	710	47969126	47969126	48414579	2359503	0.14490665500216	0.703451050626184	46789374.5	46789374.5	47234827.5	cela1_red_15_46055076	cela1_sika_15_48414579
LG1.b.701.20	Both	-2818.05033537135	-2818.05034013733	1	701	20	720	701	47154368	47154368	47599821	720	48790702	48790702	50295535	1636334	-9.53196013142588e-06	1	47972535	47972535	48947678	cela1_red_15_47599821	cela1_sika_15_50295535
LG1.b.701.20	Male	-884.660699731697	-884.660703275409	1	701	20	720	701	47154368	47154368	47599821	720	48790702	48790702	50295535	1636334	-7.08742345523206e-06	1	47972535	47972535	48947678	cela1_red_15_47599821	cela1_sika_15_50295535
LG1.b.701.20	Female	-1896.56554812467	-1896.56554942118	1	701	20	720	701	47154368	47154368	47599821	720	48790702	48790702	50295535	1636334	-2.59300441030064e-06	1	47972535	47972535	48947678	cela1_red_15_47599821	cela1_sika_15_50295535
LG1.b.711.20	Both	-2818.04485423839	-2818.04486455597	1	711	20	730	711	47977077	47977077	48422530	730	49604265	49604265	51109098	1627188	-2.06351569431718e-05	1	48790671	48790671	49765814	cela1_red_15_48422530	cela1_red_15_51109098
LG1.b.711.20	Male	-884.661028988891	-884.661029382857	1	711	20	730	711	47977077	47977077	48422530	730	49604265	49604265	51109098	1627188	-7.87933231549687e-07	1	48790671	48790671	49765814	cela1_red_15_48422530	cela1_red_15_51109098
LG1.b.711.20	Female	-1896.55946409577	-1896.55947234542	1	711	20	730	711	47977077	47977077	48422530	730	49604265	49604265	51109098	1627188	-1.64993025464355e-05	1	48790671	48790671	49765814	cela1_red_15_48422530	cela1_red_15_51109098
LG1.b.721.20	Both	-2818.0430707479	-2818.04308276024	1	721	20	740	721	48816196	48816196	50321029	740	50558228	50558228	52063061	1742032	-2.40246799876331e-05	1	49687212	49687212	51192045	cela1_sika_15_50321029	cela1_red_15_52063061
LG1.b.721.20	Male	-884.660222084062	-884.660223914675	1	721	20	740	721	48816196	48816196	50321029	740	50558228	50558228	52063061	1742032	-3.66122708328476e-06	1	49687212	49687212	51192045	cela1_sika_15_50321029	cela1_red_15_52063061
LG1.b.721.20	Female	-1896.56083714864	-1896.56084395023	1	721	20	740	721	48816196	48816196	50321029	740	50558228	50558228	52063061	1742032	-1.36031744659704e-05	1	49687212	49687212	51192045	cela1_sika_15_50321029	cela1_red_15_52063061
LG1.b.731.20	Both	-2818.04321637695	-2818.04322812113	1	731	20	750	731	49608205	49608205	51113038	750	51190496	51190496	52695329	1582291	-2.348835914745e-05	1	50399350.5	50399350.5	51904183.5	cela1_red_15_51113038	cela1_red_15_52695329
LG1.b.731.20	Male	-884.659933982089	-884.65993634184	1	731	20	750	731	49608205	49608205	51113038	750	51190496	51190496	52695329	1582291	-4.71950215796824e-06	1	50399350.5	50399350.5	51904183.5	cela1_red_15_51113038	cela1_red_15_52695329
LG1.b.731.20	Female	-1896.56366486601	-1896.56366834562	1	731	20	750	731	49608205	49608205	51113038	750	51190496	51190496	52695329	1582291	-6.9592224463122e-06	1	50399350.5	50399350.5	51904183.5	cela1_red_15_51113038	cela1_red_15_52695329
LG1.b.741.20	Both	-2818.04574674659	-2818.04575584392	1	741	20	760	741	50606139	50606139	52110972	760	51727992	51727992	53232825	1121853	-1.81946479642647e-05	1	51167065.5	51167065.5	52671898.5	cela1_red_15_52110972	cela1_red_15_53232825
LG1.b.741.20	Male	-884.659776440864	-884.659779082676	1	741	20	760	741	50606139	50606139	52110972	760	51727992	51727992	53232825	1121853	-5.28362306795316e-06	1	51167065.5	51167065.5	52671898.5	cela1_red_15_52110972	cela1_red_15_53232825
LG1.b.741.20	Female	-1896.56268247911	-1896.56268679929	1	741	20	760	741	50606139	50606139	52110972	760	51727992	51727992	53232825	1121853	-8.64034791447921e-06	1	51167065.5	51167065.5	52671898.5	cela1_red_15_52110972	cela1_red_15_53232825
LG1.b.751.20	Both	-2818.04943041536	-2818.04943633091	1	751	20	770	751	51229097	51229097	52733930	770	52492172	52492172	53997005	1263075	-1.18310908874264e-05	1	51860634.5	51860634.5	53365467.5	cela1_red_15_52733930	cela1_red_15_53997005
LG1.b.751.20	Male	-884.660063342992	-884.660065503399	1	751	20	770	751	51229097	51229097	52733930	770	52492172	52492172	53997005	1263075	-4.32081264989392e-06	1	51860634.5	51860634.5	53365467.5	cela1_red_15_52733930	cela1_red_15_53997005
LG1.b.751.20	Female	-1896.56160170385	-1896.56160737061	1	751	20	770	751	51229097	51229097	52733930	770	52492172	52492172	53997005	1263075	-1.1333504517097e-05	1	51860634.5	51860634.5	53365467.5	cela1_red_15_52733930	cela1_red_15_53997005
LG1.b.761.20	Both	-2818.05374023781	-2818.053741032	1	761	20	780	761	51779778	51779778	53284611	780	53130222	53130222	54635055	1350444	-1.58838247443782e-06	1	52455000	52455000	53959833	cela1_red_15_53284611	cela1_red_15_54635055
LG1.b.761.20	Male	-884.660222723869	-884.660224565448	1	761	20	780	761	51779778	51779778	53284611	780	53130222	53130222	54635055	1350444	-3.68315681953391e-06	1	52455000	52455000	53959833	cela1_red_15_53284611	cela1_red_15_54635055
LG1.b.761.20	Female	-1896.56376707106	-1896.56377247572	1	761	20	780	761	51779778	51779778	53284611	780	53130222	53130222	54635055	1350444	-1.08093222479511e-05	1	52455000	52455000	53959833	cela1_red_15_53284611	cela1_red_15_54635055
LG1.b.771.20	Both	-2818.05517332987	-2818.05517370732	1	771	20	790	771	52540319	52540319	54045152	790	53869121	53869121	55373954	1328802	-7.54896063881461e-07	1	53204720	53204720	54709553	cela1_red_15_54045152	cela1_red_15_55373954
LG1.b.771.20	Male	-884.659793651992	-884.659795894004	1	771	20	790	771	52540319	52540319	54045152	790	53869121	53869121	55373954	1328802	-4.48402442998486e-06	1	53204720	53204720	54709553	cela1_red_15_54045152	cela1_red_15_55373954
LG1.b.771.20	Female	-1896.56575893421	-1896.56576011408	1	771	20	790	771	52540319	52540319	54045152	790	53869121	53869121	55373954	1328802	-2.35972947848495e-06	1	53204720	53204720	54709553	cela1_red_15_54045152	cela1_red_15_55373954
LG1.b.781.20	Both	-2818.06156128436	-2817.91785894982	1	781	20	800	781	53186174	53186174	54691007	800	54832315	54832315	56337148	1646141	0.287404669090392	0.591888499678502	54009244.5	54009244.5	55514077.5	cela1_red_15_54691007	cela1_red_15_56337148
LG1.b.781.20	Male	-884.661121968122	-884.661122160798	1	781	20	800	781	53186174	53186174	54691007	800	54832315	54832315	56337148	1646141	-3.85351768272812e-07	1	54009244.5	54009244.5	55514077.5	cela1_red_15_54691007	cela1_red_15_56337148
LG1.b.781.20	Female	-1896.56651788461	-1896.56651808497	1	781	20	800	781	53186174	53186174	54691007	800	54832315	54832315	56337148	1646141	-4.00730186811415e-07	1	54009244.5	54009244.5	55514077.5	cela1_red_15_54691007	cela1_red_15_56337148
LG1.b.791.20	Both	-2818.06616227322	-2817.89790804978	1	791	20	810	791	54010598	54010598	55515431	810	55265869	55265869	56770702	1255271	0.336508446894186	0.561851579555889	54638233.5	54638233.5	56143066.5	cela1_red_15_55515431	cela1_red_15_56770702
LG1.b.791.20	Male	-884.663207787268	-884.273840192845	1	791	20	810	791	54010598	54010598	55515431	810	55265869	55265869	56770702	1255271	0.778735188845985	0.377528243306016	54638233.5	54638233.5	56143066.5	cela1_red_15_55515431	cela1_red_15_56770702
LG1.b.791.20	Female	-1896.5642158853	-1896.56421801918	1	791	20	810	791	54010598	54010598	55515431	810	55265869	55265869	56770702	1255271	-4.26776114181848e-06	1	54638233.5	54638233.5	56143066.5	cela1_red_15_55515431	cela1_red_15_56770702
LG1.b.801.20	Both	-2818.06024632308	-2818.00832165453	1	801	20	820	801	54924512	54924512	56429345	820	55812184	55812184	57317017	887672	0.103849337107931	0.747258284399777	55368348	55368348	56873181	cela1_red_15_56429345	cela1_red_15_57317017
LG1.b.801.20	Male	-884.662307568154	-884.516674803538	1	801	20	820	801	54924512	54924512	56429345	820	55812184	55812184	57317017	887672	0.29126552923185	0.589410688506672	55368348	55368348	56873181	cela1_red_15_56429345	cela1_red_15_57317017
LG1.b.801.20	Female	-1896.56367364376	-1896.56367613766	1	801	20	820	801	54924512	54924512	56429345	820	55812184	55812184	57317017	887672	-4.9878017307492e-06	1	55368348	55368348	56873181	cela1_red_15_56429345	cela1_red_15_57317017
LG1.b.811.20	Both	-2818.05794865202	-2818.04698136776	1	811	20	830	811	55306835	55306835	56811668	830	56511711	56511711	58016544	1204876	0.0219345685181906	0.882261295640937	55909273	55909273	57414106	cela1_red_15_56811668	cela1_red_15_58016544
LG1.b.811.20	Male	-884.661030975028	-884.661031464317	1	811	20	830	811	55306835	55306835	56811668	830	56511711	56511711	58016544	1204876	-9.78578327703872e-07	1	55909273	55909273	57414106	cela1_red_15_56811668	cela1_red_15_58016544
LG1.b.811.20	Female	-1896.56717652378	-1896.56545629616	1	811	20	830	811	55306835	55306835	56811668	830	56511711	56511711	58016544	1204876	0.00344045524707326	0.953226588548822	55909273	55909273	57414106	cela1_red_15_56811668	cela1_red_15_58016544
LG1.b.821.20	Both	-2818.05390238066	-2818.05390410602	1	821	20	840	821	56019173	56019173	57524006	840	57288856	57288856	58793689	1269683	-3.45072476193309e-06	1	56654014.5	56654014.5	58158847.5	cela1_sika_15_57524006	cela1_red_15_58793689
LG1.b.821.20	Male	-884.660646611952	-884.660647620498	1	821	20	840	821	56019173	56019173	57524006	840	57288856	57288856	58793689	1269683	-2.01709190150723e-06	1	56654014.5	56654014.5	58158847.5	cela1_sika_15_57524006	cela1_red_15_58793689
LG1.b.821.20	Female	-1896.56643105047	-1896.56643110832	1	821	20	840	821	56019173	56019173	57524006	840	57288856	57288856	58793689	1269683	-1.15696821012534e-07	1	56654014.5	56654014.5	58158847.5	cela1_sika_15_57524006	cela1_red_15_58793689
LG1.b.831.20	Both	-2818.05868900209	-2818.03688517921	1	831	20	850	831	56530541	56530541	58035374	850	58084187	58084187	59589020	1553646	0.0436076457472154	0.834585293425638	57307364	57307364	58812197	cela1_red_15_58035374	cela1_red_15_59589020
LG1.b.831.20	Male	-884.660395994492	-884.66039978937	1	831	20	850	831	56530541	56530541	58035374	850	58084187	58084187	59589020	1553646	-7.58975693315733e-06	1	57307364	57307364	58812197	cela1_red_15_58035374	cela1_red_15_59589020
LG1.b.831.20	Female	-1896.56700655145	-1896.56603633584	1	831	20	850	831	56530541	56530541	58035374	850	58084187	58084187	59589020	1553646	0.00194043123201482	0.964864288323201	57307364	57307364	58812197	cela1_red_15_58035374	cela1_red_15_59589020
LG1.b.841.20	Both	-2818.0780472474	-2817.55015098094	1	841	20	860	841	57358213	57358213	58863046	860	58634146	58634146	60138979	1275933	1.05579253293672	0.304176776062415	57996179.5	57996179.5	59501012.5	cela1_red_15_58863046	cela1_red_15_60138979
LG1.b.841.20	Male	-884.663323294247	-884.146818642072	1	841	20	860	841	57358213	57358213	58863046	860	58634146	58634146	60138979	1275933	1.03300930434989	0.309452915162885	57996179.5	57996179.5	59501012.5	cela1_red_15_58863046	cela1_red_15_60138979
LG1.b.841.20	Female	-1896.57554934231	-1896.34975682605	1	841	20	860	841	57358213	57358213	58863046	860	58634146	58634146	60138979	1275933	0.451585032521052	0.501583207240813	57996179.5	57996179.5	59501012.5	cela1_red_15_58863046	cela1_red_15_60138979
LG1.b.851.20	Both	-2818.06695065289	-2817.84801202157	1	851	20	870	851	58259199	58259199	59764032	870	59689937	59689937	61194770	1430738	0.437877262635993	0.508148793682784	58974568	58974568	60479401	cela1_red_15_59764032	cela1_red_15_61194770
LG1.b.851.20	Male	-884.662862380615	-884.00490246166	1	851	20	870	851	58259199	58259199	59764032	870	59689937	59689937	61194770	1430738	1.315919837911	0.251325627067223	58974568	58974568	60479401	cela1_red_15_59764032	cela1_red_15_61194770
LG1.b.851.20	Female	-1896.57212813243	-1896.43780668684	1	851	20	870	851	58259199	58259199	59764032	870	59689937	59689937	61194770	1430738	0.268642891183845	0.604243588431437	58974568	58974568	60479401	cela1_red_15_59764032	cela1_red_15_61194770
LG1.b.861.20	Both	-2818.05266797054	-2818.05267005035	1	861	20	880	861	58704000	58704000	60208833	880	60380921	60380921	61885754	1676921	-4.1596313167247e-06	1	59542460.5	59542460.5	61047293.5	cela1_red_15_60208833	cela1_red_15_61885754
LG1.b.861.20	Male	-884.661068975066	-884.661070469692	1	861	20	880	861	58704000	58704000	60208833	880	60380921	60380921	61885754	1676921	-2.98925033348496e-06	1	59542460.5	59542460.5	61047293.5	cela1_red_15_60208833	cela1_red_15_61885754
LG1.b.861.20	Female	-1896.5679210561	-1896.54817265039	1	861	20	880	861	58704000	58704000	60208833	880	60380921	60380921	61885754	1676921	0.0394968114278527	0.842467660219238	59542460.5	59542460.5	61047293.5	cela1_red_15_60208833	cela1_red_15_61885754
LG1.b.871.20	Both	-2818.05588932685	-2818.05550617571	1	871	20	890	871	59799523	59799523	61304356	890	61488405	61488405	62993238	1688882	0.000766302273405017	0.977915648314728	60643964	60643964	62148797	cela1_red_15_61304356	cela1_red_15_62993238
LG1.b.871.20	Male	-884.660675627974	-884.660677667836	1	871	20	890	871	59799523	59799523	61304356	890	61488405	61488405	62993238	1688882	-4.07972402172163e-06	1	60643964	60643964	62148797	cela1_red_15_61304356	cela1_red_15_62993238
LG1.b.871.20	Female	-1896.56805900063	-1896.55345862108	1	871	20	890	871	59799523	59799523	61304356	890	61488405	61488405	62993238	1688882	0.029200759106061	0.864316317601224	60643964	60643964	62148797	cela1_red_15_61304356	cela1_red_15_62993238
LG1.b.881.20	Both	-2818.05402456274	-2818.05402594452	1	881	20	900	881	60778321	60778321	62283154	900	62232905	62232905	63737738	1454584	-2.76354785455624e-06	1	61505613	61505613	63010446	cela1_red_15_62283154	cela1_red_15_63737738
LG1.b.881.20	Male	-884.661710949842	-884.605918235408	1	881	20	900	881	60778321	60778321	62283154	900	62232905	62232905	63737738	1454584	0.111585428868693	0.738346317119258	61505613	61505613	63010446	cela1_red_15_62283154	cela1_red_15_63737738
LG1.b.881.20	Female	-1896.56094693426	-1896.56095212616	1	881	20	900	881	60778321	60778321	62283154	900	62232905	62232905	63737738	1454584	-1.03838060567796e-05	1	61505613	61505613	63010446	cela1_red_15_62283154	cela1_red_15_63737738
LG1.b.891.20	Both	-2818.05040123325	-2818.05040615136	1	891	20	910	891	61508820	61508820	63013653	910	63037148	63037148	64541981	1528328	-9.83622066996759e-06	1	62272984	62272984	63777817	cela1_red_15_63013653	cela1_red_15_64541981
LG1.b.891.20	Male	-884.661075410355	-884.66107646928	1	891	20	910	891	61508820	61508820	63013653	910	63037148	63037148	64541981	1528328	-2.11784890780109e-06	1	62272984	62272984	63777817	cela1_red_15_63013653	cela1_red_15_64541981
LG1.b.891.20	Female	-1896.56066788536	-1896.56067444002	1	891	20	910	891	61508820	61508820	63013653	910	63037148	63037148	64541981	1528328	-1.31093233903812e-05	1	62272984	62272984	63777817	cela1_red_15_63013653	cela1_red_15_64541981
LG1.b.901.20	Both	-2818.04502715788	-2818.0450366796	1	901	20	920	901	62350459	62350459	63855292	920	63815764	63815764	65320597	1465305	-1.90434275282314e-05	1	63083111.5	63083111.5	64587944.5	cela1_red_15_63855292	cela1_red_15_65320597
LG1.b.901.20	Male	-884.660455031119	-884.660456781673	1	901	20	920	901	62350459	62350459	63855292	920	63815764	63815764	65320597	1465305	-3.5011089494219e-06	1	63083111.5	63083111.5	64587944.5	cela1_red_15_63855292	cela1_red_15_65320597
LG1.b.901.20	Female	-1896.55883332206	-1896.55884168538	1	901	20	920	901	62350459	62350459	63855292	920	63815764	63815764	65320597	1465305	-1.6726638932596e-05	1	63083111.5	63083111.5	64587944.5	cela1_red_15_63855292	cela1_red_15_65320597
LG1.b.911.20	Both	-2818.05214540826	-2818.05214863143	1	911	20	930	911	63082404	63082404	64587237	930	64585907	64585907	66090740	1503503	-6.44635383650893e-06	1	63834155.5	63834155.5	65338988.5	cela1_red_15_64587237	cela1_red_15_66090740
LG1.b.911.20	Male	-884.660979215298	-884.660979581902	1	911	20	930	911	63082404	63082404	64587237	930	64585907	64585907	66090740	1503503	-7.33208253222983e-07	1	63834155.5	63834155.5	65338988.5	cela1_red_15_64587237	cela1_red_15_66090740
LG1.b.911.20	Female	-1896.56269787669	-1896.56270191416	1	911	20	930	911	63082404	63082404	64587237	930	64585907	64585907	66090740	1503503	-8.07494325272273e-06	1	63834155.5	63834155.5	65338988.5	cela1_red_15_64587237	cela1_red_15_66090740
LG1.b.921.20	Both	-2818.07124012363	-2817.76251845331	1	921	20	940	921	63863600	63863600	65368433	940	65588709	65588709	67093542	1725109	0.617443340634964	0.431998946199269	64726154.5	64726154.5	66230987.5	cela1_red_15_65368433	cela1_red_15_67093542
LG1.b.921.20	Male	-884.65931282049	-884.659315938975	1	921	20	940	921	63863600	63863600	65368433	940	65588709	65588709	67093542	1725109	-6.2369706483878e-06	1	64726154.5	64726154.5	66230987.5	cela1_red_15_65368433	cela1_red_15_67093542
LG1.b.921.20	Female	-1896.5772343568	-1896.21684194982	1	921	20	940	921	63863600	63863600	65368433	940	65588709	65588709	67093542	1725109	0.720784813953742	0.395886596570749	64726154.5	64726154.5	66230987.5	cela1_red_15_65368433	cela1_red_15_67093542
LG1.b.931.20	Both	-2818.07847938278	-2817.59222397746	1	931	20	950	931	64694316	64694316	66199149	950	66511103	66511103	68015936	1816787	0.972510810642234	0.324054787291327	65602709.5	65602709.5	67107542.5	cela1_red_15_66199149	cela1_red_15_68015936
LG1.b.931.20	Male	-884.659263218054	-884.659266490833	1	931	20	950	931	64694316	64694316	66199149	950	66511103	66511103	68015936	1816787	-6.54555879009422e-06	1	65602709.5	65602709.5	67107542.5	cela1_red_15_66199149	cela1_red_15_68015936
LG1.b.931.20	Female	-1896.5822856835	-1895.99484167352	1	931	20	950	931	64694316	64694316	66199149	950	66511103	66511103	68015936	1816787	1.17488801996069	0.278399155588582	65602709.5	65602709.5	67107542.5	cela1_red_15_66199149	cela1_red_15_68015936
LG1.b.941.20	Both	-2818.06058971437	-2817.97619077176	1	941	20	960	941	65613728	65613728	67118561	960	67280315	67280315	68785148	1666587	0.168797885223285	0.681182382212193	66447021.5	66447021.5	67951854.5	cela1_red_15_67118561	cela1_red_15_68785148
LG1.b.941.20	Male	-884.659291627668	-884.659294514367	1	941	20	960	941	65613728	65613728	67118561	960	67280315	67280315	68785148	1666587	-5.77339733354165e-06	1	66447021.5	66447021.5	67951854.5	cela1_red_15_67118561	cela1_red_15_68785148
LG1.b.941.20	Female	-1896.57167557428	-1896.35945363907	1	941	20	960	941	65613728	65613728	67118561	960	67280315	67280315	68785148	1666587	0.424443870410869	0.514727927134242	66447021.5	66447021.5	67951854.5	cela1_red_15_67118561	cela1_red_15_68785148
LG1.b.951.20	Both	-2818.04745273157	-2818.04745897122	1	951	20	970	951	66588250	66588250	68093083	970	67655350	67655350	69160183	1067100	-1.24792913993588e-05	1	67121800	67121800	68626633	cela1_red_15_68093083	cela1_red_15_69160183
LG1.b.951.20	Male	-884.660192372655	-884.660193904901	1	951	20	970	951	66588250	66588250	68093083	970	67655350	67655350	69160183	1067100	-3.06449123854691e-06	1	67121800	67121800	68626633	cela1_red_15_68093083	cela1_red_15_69160183
LG1.b.951.20	Female	-1896.56243750123	-1896.56244126726	1	951	20	970	951	66588250	66588250	68093083	970	67655350	67655350	69160183	1067100	-7.53206359149772e-06	1	67121800	67121800	68626633	cela1_red_15_68093083	cela1_red_15_69160183
LG1.b.961.20	Both	-2818.05057924594	-2818.05058314978	1	961	20	980	961	67317243	67317243	68822076	980	68244191	68244191	69749024	926948	-7.80767641117563e-06	1	67780717	67780717	69285550	cela1_red_15_68822076	cela1_red_15_69749024
LG1.b.961.20	Male	-884.660194021984	-884.660195550885	1	961	20	980	961	67317243	67317243	68822076	980	68244191	68244191	69749024	926948	-3.05780076814699e-06	1	67780717	67780717	69285550	cela1_red_15_68822076	cela1_red_15_69749024
LG1.b.961.20	Female	-1896.562993257	-1896.56299651653	1	961	20	980	961	67317243	67317243	68822076	980	68244191	68244191	69749024	926948	-6.51905565973721e-06	1	67780717	67780717	69285550	cela1_red_15_68822076	cela1_red_15_69749024
LG1.b.971.20	Both	-2818.04763036723	-2818.04763642748	1	971	20	990	971	67680933	67680933	69185766	990	68937302	68937302	70442135	1256369	-1.21205093819299e-05	1	68309117.5	68309117.5	69813950.5	cela1_red_15_69185766	cela1_red_15_70442135
LG1.b.971.20	Male	-884.660068041573	-884.660069751795	1	971	20	990	971	67680933	67680933	69185766	990	68937302	68937302	70442135	1256369	-3.42044313583756e-06	1	68309117.5	68309117.5	69813950.5	cela1_red_15_69185766	cela1_red_15_70442135
LG1.b.971.20	Female	-1896.56236445542	-1896.56236830172	1	971	20	990	971	67680933	67680933	69185766	990	68937302	68937302	70442135	1256369	-7.69260850574938e-06	1	68309117.5	68309117.5	69813950.5	cela1_red_15_69185766	cela1_red_15_70442135
LG1.b.981.20	Both	-2818.05136144629	-2818.05136454189	1	981	20	1000	981	68263102	68263102	69767935	1000	69237646	69237646	70742479	974544	-6.19119782641064e-06	1	68750374	68750374	70255207	cela1_red_15_69767935	cela1_red_15_70742479
LG1.b.981.20	Male	-884.660384909836	-884.660392343074	1	981	20	1000	981	68263102	68263102	69767935	1000	69237646	69237646	70742479	974544	-1.48664762491535e-05	1	68750374	68750374	70255207	cela1_red_15_69767935	cela1_red_15_70742479
LG1.b.981.20	Female	-1896.56595949684	-1896.56595997795	1	981	20	1000	981	68263102	68263102	69767935	1000	69237646	69237646	70742479	974544	-9.62217200140003e-07	1	68750374	68750374	70255207	cela1_red_15_69767935	cela1_red_15_70742479
LG1.b.991.20	Both	-2818.0598803953	-2818.014446874	1	991	20	1010	991	68965837	68965837	70470670	1010	69730392	69730392	71235225	764555	0.090867042607897	0.763077770839133	69348114.5	69348114.5	70852947.5	cela1_sika_15_70470670	cela1_red_15_71235225
LG1.b.991.20	Male	-884.66103297572	-884.661033060744	1	991	20	1010	991	68965837	68965837	70470670	1010	69730392	69730392	71235225	764555	-1.70048679137835e-07	1	69348114.5	69348114.5	70852947.5	cela1_sika_15_70470670	cela1_red_15_71235225
LG1.b.991.20	Female	-1896.56993439771	-1896.49240950419	1	991	20	1010	991	68965837	68965837	70470670	1010	69730392	69730392	71235225	764555	0.155049787038479	0.693755567270302	69348114.5	69348114.5	70852947.5	cela1_sika_15_70470670	cela1_red_15_71235225
LG1.b.1001.20	Both	-2818.06304853698	-2817.56512081791	1	1001	20	1020	1001	69349137	69349137	70853970	1020	70855161	70855161	72359994	1506024	0.995855438158287	0.318315453024748	70102149	70102149	71606982	cela1_red_15_70853970	cela1_red_15_72359994
LG1.b.1001.20	Male	-884.662475186023	-884.557033795369	1	1001	20	1020	1001	69349137	69349137	70853970	1020	70855161	70855161	72359994	1506024	0.210882781308101	0.646076367291298	70102149	70102149	71606982	cela1_red_15_70853970	cela1_red_15_72359994
LG1.b.1001.20	Female	-1896.56977268536	-1896.2679309087	1	1001	20	1020	1001	69349137	69349137	70853970	1020	70855161	70855161	72359994	1506024	0.603683553310475	0.437176024987189	70102149	70102149	71606982	cela1_red_15_70853970	cela1_red_15_72359994
LG1.b.1011.20	Both	-2818.05864345693	-2818.00326387902	1	1011	20	1030	1011	69782736	69782736	71287569	1030	71509341	71509341	73014174	1726605	0.110759155818414	0.739281497582117	70646038.5	70646038.5	72150871.5	cela1_red_15_71287569	cela1_red_15_73014174
LG1.b.1011.20	Male	-884.662591789561	-884.49061816936	1	1011	20	1030	1011	69782736	69782736	71287569	1030	71509341	71509341	73014174	1726605	0.343947240402258	0.557559613136003	70646038.5	70646038.5	72150871.5	cela1_red_15_71287569	cela1_red_15_73014174
LG1.b.1011.20	Female	-1896.56771170995	-1896.55491503987	1	1011	20	1030	1011	69782736	69782736	71287569	1030	71509341	71509341	73014174	1726605	0.025593340154046	0.872897469702161	70646038.5	70646038.5	72150871.5	cela1_red_15_71287569	cela1_red_15_73014174
LG1.b.1021.20	Both	-2818.04657964818	-2818.04658637085	1	1021	20	1040	1021	70880510	70880510	72385343	1040	72344341	72344341	73849174	1463831	-1.34453266582568e-05	1	71612425.5	71612425.5	73117258.5	cela1_red_15_72385343	cela1_red_15_73849174
LG1.b.1021.20	Male	-884.66142742306	-884.656970626384	1	1021	20	1040	1021	70880510	70880510	72385343	1040	72344341	72344341	73849174	1463831	0.00891359335219022	0.924782020028296	71612425.5	71612425.5	73117258.5	cela1_red_15_72385343	cela1_red_15_73849174
LG1.b.1021.20	Female	-1896.56005025334	-1896.56005602121	1	1021	20	1040	1021	70880510	70880510	72385343	1040	72344341	72344341	73849174	1463831	-1.15357502181723e-05	1	71612425.5	71612425.5	73117258.5	cela1_red_15_72385343	cela1_red_15_73849174
LG1.b.1031.20	Both	-2818.04628348282	-2818.04629051875	1	1031	20	1050	1031	71541511	71541511	73046344	1050	73026778	73026778	74531611	1485267	-1.40718575494247e-05	1	72284144.5	72284144.5	73788977.5	cela1_red_15_73046344	cela1_red_15_74531611
LG1.b.1031.20	Male	-884.659888311124	-884.659890146463	1	1031	20	1050	1031	71541511	71541511	73046344	1050	73026778	73026778	74531611	1485267	-3.67067832485191e-06	1	72284144.5	72284144.5	73788977.5	cela1_red_15_73046344	cela1_red_15_74531611
LG1.b.1031.20	Female	-1896.55851843585	-1896.55852585018	1	1031	20	1050	1031	71541511	71541511	73046344	1050	73026778	73026778	74531611	1485267	-1.48286630974326e-05	1	72284144.5	72284144.5	73788977.5	cela1_red_15_73046344	cela1_red_15_74531611
LG1.b.1041.20	Both	-2818.06444562438	-2817.4917645086	1	1041	20	1060	1041	72378791	72378791	73883624	1060	73532087	73532087	75036920	1153296	1.14536223154937	0.284522105641062	72955439	72955439	74460272	cela1_red_15_73883624	cela1_red_15_75036920
LG1.b.1041.20	Male	-884.66053536487	-884.660536284697	1	1041	20	1060	1041	72378791	72378791	73883624	1060	73532087	73532087	75036920	1153296	-1.83965380529116e-06	1	72955439	72955439	74460272	cela1_red_15_73883624	cela1_red_15_75036920
LG1.b.1041.20	Female	-1896.57234130267	-1895.88338100841	1	1041	20	1060	1041	72378791	72378791	73883624	1060	73532087	73532087	75036920	1153296	1.37792058851619	0.240455664507817	72955439	72955439	74460272	cela1_red_15_73883624	cela1_red_15_75036920
LG1.b.1051.20	Both	-2818.06878355108	-2817.26987668572	1	1051	20	1070	1051	73061147	73061147	74565980	1070	74150890	74150890	75655723	1089743	1.59781373070564	0.206213312325002	73606018.5	73606018.5	75110851.5	cela1_red_15_74565980	cela1_red_15_75655723
LG1.b.1051.20	Male	-884.661644626009	-884.617442461987	1	1051	20	1070	1051	73061147	73061147	74565980	1070	74150890	74150890	75655723	1089743	0.0884043280441347	0.766215608102834	73606018.5	73606018.5	75110851.5	cela1_red_15_74565980	cela1_red_15_75655723
LG1.b.1051.20	Female	-1896.57737212493	-1895.47198623879	1	1051	20	1070	1051	73061147	73061147	74565980	1070	74150890	74150890	75655723	1089743	2.2107717722829	0.13705009285224	73606018.5	73606018.5	75110851.5	cela1_red_15_74565980	cela1_red_15_75655723
LG1.b.1061.20	Both	-2818.05393722426	-2818.05394029952	1	1061	20	1080	1061	73586609	73586609	75091442	1080	75016031	75016031	76520864	1429422	-6.15050339547452e-06	1	74301320	74301320	75806153	cela1_red_15_75091442	cela1_red_15_76520864
LG1.b.1061.20	Male	-884.664645563111	-884.19614928552	1	1061	20	1080	1061	73586609	73586609	75091442	1080	75016031	75016031	76520864	1429422	0.936992555182087	0.333052481527232	74301320	74301320	75806153	cela1_red_15_75091442	cela1_red_15_76520864
LG1.b.1061.20	Female	-1896.56568869102	-1896.5656913044	1	1061	20	1080	1061	73586609	73586609	75091442	1080	75016031	75016031	76520864	1429422	-5.22675645697745e-06	1	74301320	74301320	75806153	cela1_red_15_75091442	cela1_red_15_76520864
LG1.b.1067.20	Both	-2818.06488693801	-2817.68278721647	1	1067	20	1086	1067	74054522	74054522	75559355	1086	75609931	75609931	77114764	1555409	0.764199443075086	0.382017504473534	74832226.5	74832226.5	76337059.5	cela1_red_15_75559355	cela1_red_15_77114764
LG1.b.1067.20	Male	-884.664577038541	-884.311943558473	1	1067	20	1086	1067	74054522	74054522	75559355	1086	75609931	75609931	77114764	1555409	0.705266960135305	0.401019558496788	74832226.5	74832226.5	76337059.5	cela1_red_15_75559355	cela1_red_15_77114764
LG1.b.1067.20	Female	-1896.57216258366	-1896.23357570259	1	1067	20	1086	1067	74054522	74054522	75559355	1086	75609931	75609931	77114764	1555409	0.677173762144321	0.410561631043827	74832226.5	74832226.5	76337059.5	cela1_red_15_75559355	cela1_red_15_77114764
LG2.b.1.20	Both	-2818.06041366134	-2817.98027037172	2	1	20	20	1159	82720091	1033920	1040826	1178	83664725	1978554	1985460	944634	0.160286579249259	0.688892807259069	1506237	83192408	1513143	cela1_red_29_1040826	cela1_red_29_1985460
LG2.b.1.20	Male	-884.661829374819	-884.609711118703	2	1	20	20	1159	82720091	1033920	1040826	1178	83664725	1978554	1985460	944634	0.104236512232546	0.746803695523556	1506237	83192408	1513143	cela1_red_29_1040826	cela1_red_29_1985460
LG2.b.1.20	Female	-1896.56827078168	-1896.53316275866	2	1	20	20	1159	82720091	1033920	1040826	1178	83664725	1978554	1985460	944634	0.0702160460327832	0.791022476849979	1506237	83192408	1513143	cela1_red_29_1040826	cela1_red_29_1985460
LG2.b.11.20	Both	-2818.05611757266	-2818.05553074039	2	11	20	30	1169	83192766	1506595	1513501	1188	84412762	2726591	2733497	1219996	0.00117366453378054	0.972670788225053	2116593	83802764	2123499	cela1_red_29_1513501	cela1_red_29_2733497
LG2.b.11.20	Male	-884.660775830966	-884.660776347719	2	11	20	30	1169	83192766	1506595	1513501	1188	84412762	2726591	2733497	1219996	-1.03350566860172e-06	1	2116593	83802764	2123499	cela1_red_29_1513501	cela1_red_29_2733497
LG2.b.11.20	Female	-1896.56627647659	-1896.56627660251	2	11	20	30	1169	83192766	1506595	1513501	1188	84412762	2726591	2733497	1219996	-2.51839082920924e-07	1	2116593	83802764	2123499	cela1_red_29_1513501	cela1_red_29_2733497
LG2.b.21.20	Both	-2818.05707990453	-2818.04730277951	2	21	20	40	1179	83694180	2008009	2014915	1198	85226706	3540535	3547441	1532526	0.0195542500459851	0.888789164423525	2774272	84460443	2781178	cela1_red_29_2014915	cela1_red_29_3547441
LG2.b.21.20	Male	-884.660591229798	-884.660594080663	2	21	20	40	1179	83694180	2008009	2014915	1198	85226706	3540535	3547441	1532526	-5.70172937841562e-06	1	2774272	84460443	2781178	cela1_red_29_2014915	cela1_red_29_3547441
LG2.b.21.20	Female	-1896.5669152215	-1896.56490026774	2	21	20	40	1179	83694180	2008009	2014915	1198	85226706	3540535	3547441	1532526	0.00402990750490062	0.949383048602456	2774272	84460443	2781178	cela1_red_29_2014915	cela1_red_29_3547441
LG2.b.31.20	Both	-2818.05512277419	-2818.05512437384	2	31	20	50	1189	84428513	2742342	2749248	1208	85739589	4053418	4060324	1311076	-3.19929949910147e-06	1	3397880	85084051	3404786	cela1_red_29_2749248	cela1_red_29_4060324
LG2.b.31.20	Male	-884.660181599875	-884.66018283974	2	31	20	50	1189	84428513	2742342	2749248	1208	85739589	4053418	4060324	1311076	-2.4797288915579e-06	1	3397880	85084051	3404786	cela1_red_29_2749248	cela1_red_29_4060324
LG2.b.31.20	Female	-1896.56660070365	-1896.56660072282	2	31	20	50	1189	84428513	2742342	2749248	1208	85739589	4053418	4060324	1311076	-3.83461156161502e-08	1	3397880	85084051	3404786	cela1_red_29_2749248	cela1_red_29_4060324
LG2.b.41.20	Both	-2818.0482080594	-2818.04821362219	2	41	20	60	1199	85265002	3578831	3585737	1218	86204405	4518234	4525140	939403	-1.11255767478724e-05	1	4048532.5	85734703.5	4055438.5	cela1_red_29_3585737	cela1_red_29_4525140
LG2.b.41.20	Male	-884.660856968101	-884.660857451069	2	41	20	60	1199	85265002	3578831	3585737	1218	86204405	4518234	4525140	939403	-9.65935441854526e-07	1	4048532.5	85734703.5	4055438.5	cela1_red_29_3585737	cela1_red_29_4525140
LG2.b.41.20	Female	-1896.56376914406	-1896.56377626882	2	41	20	60	1199	85265002	3578831	3585737	1218	86204405	4518234	4525140	939403	-1.42495282489108e-05	1	4048532.5	85734703.5	4055438.5	cela1_red_29_3585737	cela1_red_29_4525140
LG2.b.51.20	Both	-2818.04857865348	-2818.04859088107	2	51	20	70	1209	85778884	4092713	4099619	1228	86558096	4871925	4878831	779212	-2.4455172024318e-05	1	4482319	86168490	4489225	cela1_red_29_4099619	cela1_red_29_4878831
LG2.b.51.20	Male	-884.662701133367	-884.438523742449	2	51	20	70	1209	85778884	4092713	4099619	1228	86558096	4871925	4878831	779212	0.448354781836315	0.503117279407772	4482319	86168490	4489225	cela1_red_29_4099619	cela1_red_29_4878831
LG2.b.51.20	Female	-1896.56405630007	-1896.56406939681	2	51	20	70	1209	85778884	4092713	4099619	1228	86558096	4871925	4878831	779212	-2.61934719674173e-05	1	4482319	86168490	4489225	cela1_red_29_4099619	cela1_red_29_4878831
LG2.b.61.20	Both	-2818.05303618712	-2818.05303816363	2	61	20	80	1219	86255406	4569235	4576141	1238	87819425	6133254	6140160	1564019	-3.95300321542891e-06	1	5351244.5	87037415.5	5358150.5	cela1_red_29_4576141	cela1_red_29_6140160
LG2.b.61.20	Male	-884.662481831678	-884.406480588782	2	61	20	80	1219	86255406	4569235	4576141	1238	87819425	6133254	6140160	1564019	0.51200248579039	0.474273277866933	5351244.5	87037415.5	5358150.5	cela1_red_29_4576141	cela1_red_29_6140160
LG2.b.61.20	Female	-1896.56468954811	-1896.56469320547	2	61	20	80	1219	86255406	4569235	4576141	1238	87819425	6133254	6140160	1564019	-7.31472073312034e-06	1	5351244.5	87037415.5	5358150.5	cela1_red_29_4576141	cela1_red_29_6140160
LG2.b.71.20	Both	-2818.04955087691	-2818.04956658777	2	71	20	90	1229	86703830	5017659	5024565	1248	88557024	6870853	6877759	1853194	-3.14217322738841e-05	1	5944256	87630427	5951162	cela1_red_29_5024565	cela1_red_29_6877759
LG2.b.71.20	Male	-884.661661667797	-884.481828401846	2	71	20	90	1229	86703830	5017659	5024565	1248	88557024	6870853	6877759	1853194	0.359666531902349	0.548691493476836	5944256	87630427	5951162	cela1_red_29_5024565	cela1_red_29_6877759
LG2.b.71.20	Female	-1896.56239403623	-1896.56240794514	2	71	20	90	1229	86703830	5017659	5024565	1248	88557024	6870853	6877759	1853194	-2.78178135886264e-05	1	5944256	87630427	5951162	cela1_red_29_5024565	cela1_red_29_6877759
LG2.b.81.20	Both	-2818.05083449166	-2818.05083684557	2	81	20	100	1239	87868194	6182023	6188929	1258	89140163	7453992	7460898	1271969	-4.70781833428191e-06	1	6818007.5	88504178.5	6824913.5	cela1_red_29_6188929	cela1_red_29_7460898
LG2.b.81.20	Male	-884.660594033944	-884.660595030624	2	81	20	100	1239	87868194	6182023	6188929	1258	89140163	7453992	7460898	1271969	-1.99335909201181e-06	1	6818007.5	88504178.5	6824913.5	cela1_red_29_6188929	cela1_red_29_7460898
LG2.b.81.20	Female	-1896.56390237315	-1896.56390494398	2	81	20	100	1239	87868194	6182023	6188929	1258	89140163	7453992	7460898	1271969	-5.14165594722726e-06	1	6818007.5	88504178.5	6824913.5	cela1_red_29_6188929	cela1_red_29_7460898
LG2.b.91.20	Both	-2818.0588646188	-2818.03116669522	2	91	20	110	1249	88590114	6903943	6910849	1268	89725361	8039190	8046096	1135247	0.0553958471518854	0.81392682746346	7471566.5	89157737.5	7478472.5	cela1_red_29_6910849	cela1_red_29_8046096
LG2.b.91.20	Male	-884.662071463725	-884.561067647437	2	91	20	110	1249	88590114	6903943	6910849	1268	89725361	8039190	8046096	1135247	0.202007632576851	0.653105199764952	7471566.5	89157737.5	7478472.5	cela1_red_29_6910849	cela1_red_29_8046096
LG2.b.91.20	Female	-1896.56720024015	-1896.5640619596	2	91	20	110	1249	88590114	6903943	6910849	1268	89725361	8039190	8046096	1135247	0.00627656109008967	0.936853858419143	7471566.5	89157737.5	7478472.5	cela1_red_29_6910849	cela1_red_29_8046096
LG2.b.101.20	Both	-2818.0578877256	-2818.03713504671	2	101	20	120	1259	89209127	7522956	7529862	1278	90546329	8860158	8867064	1337202	0.0415053577726212	0.838565561944684	8191557	89877728	8198463	cela1_red_29_7529862	cela1_red_29_8867064
LG2.b.101.20	Male	-884.663945331157	-882.955871673834	2	101	20	120	1259	89209127	7522956	7529862	1278	90546329	8860158	8867064	1337202	3.41614731464711	0.0645615206199639	8191557	89877728	8198463	cela1_red_29_7529862	cela1_red_29_8867064
LG2.b.101.20	Female	-1896.56407325862	-1896.5640754274	2	101	20	120	1259	89209127	7522956	7529862	1278	90546329	8860158	8867064	1337202	-4.33755621997989e-06	1	8191557	89877728	8198463	cela1_red_29_7529862	cela1_red_29_8867064
LG2.b.111.20	Both	-2818.05876960237	-2818.01297689334	2	111	20	130	1269	89772414	8086243	8093149	1288	91235076	9548905	9555811	1462662	0.0915854180511815	0.762171218150565	8817574	90503745	8824480	cela1_red_29_8093149	cela1_red_29_9555811
LG2.b.111.20	Male	-884.663394830651	-883.708917500525	2	111	20	130	1269	89772414	8086243	8093149	1288	91235076	9548905	9555811	1462662	1.90895466025336	0.167079422926497	8817574	90503745	8824480	cela1_red_29_8093149	cela1_red_29_9555811
LG2.b.111.20	Female	-1896.56577605521	-1896.56577692449	2	111	20	130	1269	89772414	8086243	8093149	1288	91235076	9548905	9555811	1462662	-1.7385746104992e-06	1	8817574	90503745	8824480	cela1_red_29_8093149	cela1_red_29_9555811
LG2.b.121.20	Both	-2818.055922463	-2818.05592274336	2	121	20	140	1279	90732001	9045830	9052736	1298	91725091	10038920	10045826	993090	-5.60723492526449e-07	1	9542375	91228546	9549281	cela1_red_29_9052736	cela1_red_29_10045826
LG2.b.121.20	Male	-884.661709532725	-884.336173068099	2	121	20	140	1279	90732001	9045830	9052736	1298	91725091	10038920	10045826	993090	0.65107292925245	0.41972934038871	9542375	91228546	9549281	cela1_red_29_9052736	cela1_red_29_10045826
LG2.b.121.20	Female	-1896.56652191646	-1896.56652236574	2	121	20	140	1279	90732001	9045830	9052736	1298	91725091	10038920	10045826	993090	-8.98566213436425e-07	1	9542375	91228546	9549281	cela1_red_29_9052736	cela1_red_29_10045826
LG2.b.131.20	Both	-2818.0439576512	-2818.04396739709	2	131	20	150	1289	91276276	9590105	9597011	1308	92302303	10616132	10623038	1026027	-1.9491779312375e-05	1	10103118.5	91789289.5	10110024.5	cela1_red_29_9597011	cela1_red_29_10623038
LG2.b.131.20	Male	-884.663618004986	-883.659705674108	2	131	20	150	1289	91276276	9590105	9597011	1308	92302303	10616132	10623038	1026027	2.00782466175724	0.156489565092061	10103118.5	91789289.5	10110024.5	cela1_red_29_9597011	cela1_red_29_10623038
LG2.b.131.20	Female	-1896.56060062036	-1896.56060686522	2	131	20	150	1289	91276276	9590105	9597011	1308	92302303	10616132	10623038	1026027	-1.24897146633884e-05	1	10103118.5	91789289.5	10110024.5	cela1_red_29_9597011	cela1_red_29_10623038
LG2.b.141.20	Both	-2818.0472795431	-2818.04728632849	2	141	20	160	1299	91848335	10162164	10169070	1318	92799714	11113543	11120449	951379	-1.35707769004512e-05	1	10637853.5	92324024.5	10644759.5	cela1_red_29_10169070	cela1_red_29_11120449
LG2.b.141.20	Male	-884.662402431143	-884.388155139617	2	141	20	160	1299	91848335	10162164	10169070	1318	92799714	11113543	11120449	951379	0.548494583052388	0.458933459870776	10637853.5	92324024.5	10644759.5	cela1_red_29_10169070	cela1_red_29_11120449
LG2.b.141.20	Female	-1896.566624651	-1896.56662471206	2	141	20	160	1299	91848335	10162164	10169070	1318	92799714	11113543	11120449	951379	-1.22120582091156e-07	1	10637853.5	92324024.5	10644759.5	cela1_red_29_10169070	cela1_red_29_11120449
LG2.b.151.20	Both	-2818.05327349369	-2818.05327560906	2	151	20	170	1309	92309445	10623274	10630180	1328	93447586	11761415	11768321	1138141	-4.23074015998282e-06	1	11192344.5	92878515.5	11199250.5	cela1_sika_29_10630180	cela1_red_29_11768321
LG2.b.151.20	Male	-884.658209623859	-884.658214262373	2	151	20	170	1309	92309445	10623274	10630180	1328	93447586	11761415	11768321	1138141	-9.27702785702422e-06	1	11192344.5	92878515.5	11199250.5	cela1_sika_29_10630180	cela1_red_29_11768321
LG2.b.151.20	Female	-1896.57260640578	-1896.42910630633	2	151	20	170	1309	92309445	10623274	10630180	1328	93447586	11761415	11768321	1138141	0.287000198908117	0.592149317543266	11192344.5	92878515.5	11199250.5	cela1_sika_29_10630180	cela1_red_29_11768321
LG2.b.161.20	Both	-2818.04777357494	-2818.04777972965	2	161	20	180	1319	92858947	11172776	11179682	1338	94285110	12598939	12605845	1426163	-1.23094068840146e-05	1	11885857.5	93572028.5	11892763.5	cela1_red_29_11179682	cela1_red_29_12605845
LG2.b.161.20	Male	-884.658209630129	-884.658214070137	2	161	20	180	1319	92858947	11172776	11179682	1338	94285110	12598939	12605845	1426163	-8.88001454768528e-06	1	11885857.5	93572028.5	11892763.5	cela1_red_29_11179682	cela1_red_29_12605845
LG2.b.161.20	Female	-1896.56743875525	-1896.56396048265	2	161	20	180	1319	92858947	11172776	11179682	1338	94285110	12598939	12605845	1426163	0.00695654519722666	0.933528792370015	11885857.5	93572028.5	11892763.5	cela1_red_29_11179682	cela1_red_29_12605845
LG2.b.171.20	Both	-2818.0432791277	-2818.04328907922	2	171	20	190	1329	93568389	11882218	11889124	1348	94865765	13179594	13186500	1297376	-1.9903051907022e-05	1	12530906	94217077	12537812	cela1_red_29_11889124	cela1_red_29_13186500
LG2.b.171.20	Male	-884.658704359211	-884.658708204071	2	171	20	190	1329	93568389	11882218	11889124	1348	94865765	13179594	13186500	1297376	-7.68972017795022e-06	1	12530906	94217077	12537812	cela1_red_29_11889124	cela1_red_29_13186500
LG2.b.171.20	Female	-1896.5653083651	-1896.5653098608	2	171	20	190	1329	93568389	11882218	11889124	1348	94865765	13179594	13186500	1297376	-2.9913990147179e-06	1	12530906	94217077	12537812	cela1_red_29_11889124	cela1_red_29_13186500
LG2.b.181.20	Both	-2818.05259189843	-2818.05259480713	2	181	20	200	1339	94446842	12760671	12767577	1358	95383346	13697175	13704081	936504	-5.8174127843813e-06	1	13228923	94915094	13235829	cela1_red_29_12767577	cela1_red_29_13704081
LG2.b.181.20	Male	-884.659524107705	-884.659526535149	2	181	20	200	1339	94446842	12760671	12767577	1358	95383346	13697175	13704081	936504	-4.85488794765843e-06	1	13228923	94915094	13235829	cela1_red_29_12767577	cela1_red_29_13704081
LG2.b.181.20	Female	-1896.57474954421	-1896.20190028595	2	181	20	200	1339	94446842	12760671	12767577	1358	95383346	13697175	13704081	936504	0.745698516521315	0.387841532514848	13228923	94915094	13235829	cela1_red_29_12767577	cela1_red_29_13704081
LG2.b.191.20	Both	-2818.06629934849	-2817.8845126806	2	191	20	210	1349	94908368	13222197	13229103	1368	96028248	14342077	14348983	1119880	0.363573335780529	0.546528362787501	13782137	95468308	13789043	cela1_red_29_13229103	cela1_red_29_14348983
LG2.b.191.20	Male	-884.65944963113	-884.659452558104	2	191	20	210	1349	94908368	13222197	13229103	1368	96028248	14342077	14348983	1119880	-5.85394809604622e-06	1	13782137	95468308	13789043	cela1_red_29_13229103	cela1_red_29_14348983
LG2.b.191.20	Female	-1896.58957373308	-1895.31605638069	2	191	20	210	1349	94908368	13222197	13229103	1368	96028248	14342077	14348983	1119880	2.5470347047667	0.110501474822862	13782137	95468308	13789043	cela1_red_29_13229103	cela1_red_29_14348983
LG2.b.201.20	Both	-2818.06260617667	-2817.9973029977	2	201	20	220	1359	95445544	13759373	13766279	1378	96607389	14921218	14928124	1161845	0.130606357933175	0.717804172905212	14340295.5	96026466.5	14347201.5	cela1_red_29_13766279	cela1_red_29_14928124
LG2.b.201.20	Male	-884.659918284983	-884.659920548193	2	201	20	220	1359	95445544	13759373	13766279	1378	96607389	14921218	14928124	1161845	-4.52642029813433e-06	1	14340295.5	96026466.5	14347201.5	cela1_red_29_13766279	cela1_red_29_14928124
LG2.b.201.20	Female	-1896.58449899746	-1895.82032952626	2	201	20	220	1359	95445544	13759373	13766279	1378	96607389	14921218	14928124	1161845	1.52833894238574	0.216361911144105	14340295.5	96026466.5	14347201.5	cela1_red_29_13766279	cela1_red_29_14928124
LG2.b.211.20	Both	-2818.05474738167	-2818.05474836196	2	211	20	230	1369	96081970	14395799	14402705	1388	97340882	15654711	15661617	1258912	-1.96057681023376e-06	1	15025255	96711426	15032161	cela1_red_29_14402705	cela1_red_29_15661617
LG2.b.211.20	Male	-884.660485189513	-884.660486295842	2	211	20	230	1369	96081970	14395799	14402705	1388	97340882	15654711	15661617	1258912	-2.21265850086638e-06	1	15025255	96711426	15032161	cela1_red_29_14402705	cela1_red_29_15661617
LG2.b.211.20	Female	-1896.57572781286	-1896.1804805627	2	211	20	230	1369	96081970	14395799	14402705	1388	97340882	15654711	15661617	1258912	0.790494500313343	0.373950641350901	15025255	96711426	15032161	cela1_red_29_14402705	cela1_red_29_15661617
LG2.b.221.20	Both	-2818.05566767044	-2818.05566762531	2	221	20	240	1379	96691480	15005309	15012215	1398	97965571	16279400	16286306	1274091	9.02455212781206e-08	0.999760308361671	15642354.5	97328525.5	15649260.5	cela1_red_29_15012215	cela1_red_29_16286306
LG2.b.221.20	Male	-884.659948393079	-884.659949732133	2	221	20	240	1379	96691480	15005309	15012215	1398	97965571	16279400	16286306	1274091	-2.67810878540331e-06	1	15642354.5	97328525.5	15649260.5	cela1_red_29_15012215	cela1_red_29_16286306
LG2.b.221.20	Female	-1896.57371904051	-1896.3018589087	2	221	20	240	1379	96691480	15005309	15012215	1398	97965571	16279400	16286306	1274091	0.543720263619889	0.460895004963761	15642354.5	97328525.5	15649260.5	cela1_red_29_15012215	cela1_red_29_16286306
LG2.b.231.20	Both	-2818.07112676638	-2817.84720441125	2	231	20	250	1389	97352706	15666535	15673441	1408	99184604	17498433	17505339	1831898	0.447844710276513	0.50336024804989	16582484	98268655	16589390	cela1_red_29_15673441	cela1_red_29_17505339
LG2.b.231.20	Male	-884.663573845581	-884.03911752074	2	231	20	250	1389	97352706	15666535	15673441	1408	99184604	17498433	17505339	1831898	1.24891264968255	0.263760256948136	16582484	98268655	16589390	cela1_red_29_15673441	cela1_red_29_17505339
LG2.b.231.20	Female	-1896.57287230206	-1896.46697034448	2	231	20	250	1389	97352706	15666535	15673441	1408	99184604	17498433	17505339	1831898	0.211803915155997	0.645357173071613	16582484	98268655	16589390	cela1_red_29_15673441	cela1_red_29_17505339
LG2.b.241.20	Both	-2818.08070300406	-2817.42654050613	2	241	20	260	1399	98051054	16364883	16371789	1418	100023158	18336987	18343893	1972104	1.30832499586086	0.25269814802689	17350935	99037106	17357841	cela1_red_29_16371789	cela1_red_29_18343893
LG2.b.241.20	Male	-884.664986978297	-883.886867572803	2	241	20	260	1399	98051054	16364883	16371789	1418	100023158	18336987	18343893	1972104	1.55623881098791	0.212216781524747	17350935	99037106	17357841	cela1_red_29_16371789	cela1_red_29_18343893
LG2.b.241.20	Female	-1896.57804548873	-1896.14270381299	2	241	20	260	1399	98051054	16364883	16371789	1418	100023158	18336987	18343893	1972104	0.870683351465686	0.350766197536761	17350935	99037106	17357841	cela1_red_29_16371789	cela1_red_29_18343893
LG2.b.251.20	Both	-2818.0743509998	-2817.47404012691	2	251	20	270	1409	99292390	17606219	17613125	1428	101295500	19609329	19616235	2003110	1.20062174578197	0.273197446755589	18607774	100293945	18614680	cela1_red_29_17613125	cela1_red_29_19616235
LG2.b.251.20	Male	-884.663322446927	-884.293549547181	2	251	20	270	1409	99292390	17606219	17613125	1428	101295500	19609329	19616235	2003110	0.739545799491907	0.389806413579387	18607774	100293945	18614680	cela1_red_29_17613125	cela1_red_29_19616235
LG2.b.251.20	Female	-1896.57590471197	-1896.19561080716	2	251	20	270	1409	99292390	17606219	17613125	1428	101295500	19609329	19616235	2003110	0.760587809626031	0.383144631724055	18607774	100293945	18614680	cela1_red_29_17613125	cela1_red_29_19616235
LG2.b.261.20	Both	-2818.06149613746	-2817.94933412401	2	261	20	280	1419	100140569	18454398	18461304	1438	101907958	20221787	20228693	1767389	0.224324026906288	0.635764794945654	19338092.5	101024263.5	19344998.5	cela1_red_29_18461304	cela1_red_29_20228693
LG2.b.261.20	Male	-884.662628247332	-884.559997960936	2	261	20	280	1419	100140569	18454398	18461304	1438	101907958	20221787	20228693	1767389	0.20526057279335	0.650507755186605	19338092.5	101024263.5	19344998.5	cela1_red_29_18461304	cela1_red_29_20228693
LG2.b.261.20	Female	-1896.5693184341	-1896.51271679921	2	261	20	280	1419	100140569	18454398	18461304	1438	101907958	20221787	20228693	1767389	0.113203269778296	0.73652632062309	19338092.5	101024263.5	19344998.5	cela1_red_29_18461304	cela1_red_29_20228693
LG2.b.271.20	Both	-2818.06243271198	-2817.94748931589	2	271	20	290	1429	101350407	19664236	19671142	1448	102455070	20768899	20775805	1104663	0.229886792182697	0.631607783080051	20216567.5	101902738.5	20223473.5	cela1_red_29_19671142	cela1_red_29_20775805
LG2.b.271.20	Male	-884.661675322958	-884.646708619285	2	271	20	290	1429	101350407	19664236	19671142	1448	102455070	20768899	20775805	1104663	0.0299334073456521	0.862641415512668	20216567.5	101902738.5	20223473.5	cela1_red_29_19671142	cela1_red_29_20775805
LG2.b.271.20	Female	-1896.57372251382	-1896.29005421855	2	271	20	290	1429	101350407	19664236	19671142	1448	102455070	20768899	20775805	1104663	0.567336590544528	0.451319229626864	20216567.5	101902738.5	20223473.5	cela1_red_29_19671142	cela1_red_29_20775805
LG2.b.281.20	Both	-2818.07201695185	-2817.66778803989	2	281	20	300	1439	102003937	20317766	20324672	1458	103039940	21353769	21360675	1036003	0.80845782391043	0.368576588653869	20835767.5	102521938.5	20842673.5	cela1_red_29_20324672	cela1_red_29_21360675
LG2.b.281.20	Male	-884.663205306295	-884.484371703424	2	281	20	300	1439	102003937	20317766	20324672	1458	103039940	21353769	21360675	1036003	0.357667205741564	0.549804672729662	20835767.5	102521938.5	20842673.5	cela1_red_29_20324672	cela1_red_29_21360675
LG2.b.281.20	Female	-1896.58003370006	-1895.91182249675	2	281	20	300	1439	102003937	20317766	20324672	1458	103039940	21353769	21360675	1036003	1.33642240661493	0.247665870729896	20835767.5	102521938.5	20842673.5	cela1_red_29_20324672	cela1_red_29_21360675
LG2.b.291.20	Both	-2818.07134322416	-2817.43715530735	2	291	20	310	1449	102478138	20791967	20798873	1468	103533501	21847330	21854236	1055363	1.26837583362249	0.260071593653944	21319648.5	103005819.5	21326554.5	cela1_red_29_20798873	cela1_red_29_21854236
LG2.b.291.20	Male	-884.662802757247	-884.515393980619	2	291	20	310	1449	102478138	20791967	20798873	1468	103533501	21847330	21854236	1055363	0.294817553256507	0.587149740142684	21319648.5	103005819.5	21326554.5	cela1_red_29_20798873	cela1_red_29_21854236
LG2.b.291.20	Female	-1896.58428719022	-1894.64883372167	2	291	20	310	1449	102478138	20791967	20798873	1468	103533501	21847330	21854236	1055363	3.87090693709024	0.0491299663453768	21319648.5	103005819.5	21326554.5	cela1_red_29_20798873	cela1_red_29_21854236
LG2.b.301.20	Both	-2818.10290137988	-2815.80330614158	2	301	20	320	1459	103077997	21391826	21398732	1478	104160781	22474610	22481516	1082784	4.5991904766106	0.0319870566401226	21933218	103619389	21940124	cela1_red_29_21398732	cela1_red_29_22481516
LG2.b.301.20	Male	-884.661337849633	-884.660923188818	2	301	20	320	1459	103077997	21391826	21398732	1478	104160781	22474610	22481516	1082784	0.000829321630135382	0.977025739938333	21933218	103619389	21940124	cela1_red_29_21398732	cela1_red_29_22481516
LG2.b.301.20	Female	-1896.60608456253	-1892.65674099529	2	301	20	320	1459	103077997	21391826	21398732	1478	104160781	22474610	22481516	1082784	7.89868713447777	0.00494706907257481	21933218	103619389	21940124	cela1_red_29_21398732	cela1_red_29_22481516
LG2.b.311.20	Both	-2818.11092977869	-2816.09181426321	2	311	20	330	1469	103671778	21985607	21992513	1488	104698824	23012653	23019559	1027046	4.0382310309642	0.0444804237210041	22499130	104185301	22506036	cela1_red_29_21992513	cela1_red_29_23019559
LG2.b.311.20	Male	-884.662445167292	-884.557697781652	2	311	20	330	1469	103671778	21985607	21992513	1488	104698824	23012653	23019559	1027046	0.209494771281015	0.647163685545321	22499130	104185301	22506036	cela1_red_29_21992513	cela1_red_29_23019559
LG2.b.311.20	Female	-1896.61209072171	-1893.51796486133	2	311	20	330	1469	103671778	21985607	21992513	1488	104698824	23012653	23019559	1027046	6.18825172076549	0.0128601172321595	22499130	104185301	22506036	cela1_red_29_21992513	cela1_red_29_23019559
LG2.b.321.20	Both	-2818.10044986356	-2816.41095783603	2	321	20	340	1479	104202083	22515912	22522818	1498	105183272	23497101	23504007	981189	3.37898405505166	0.0660327468842409	23006506.5	104692677.5	23013412.5	cela1_red_29_22522818	cela1_red_29_23504007
LG2.b.321.20	Male	-884.662599862241	-884.553936931184	2	321	20	340	1479	104202083	22515912	22522818	1498	105183272	23497101	23504007	981189	0.217325862114876	0.641085075055369	23006506.5	104692677.5	23013412.5	cela1_red_29_22522818	cela1_red_29_23504007
LG2.b.321.20	Female	-1896.61244460849	-1893.27758186194	2	321	20	340	1479	104202083	22515912	22522818	1498	105183272	23497101	23504007	981189	6.66972549308548	0.00980642914372887	23006506.5	104692677.5	23013412.5	cela1_red_29_22522818	cela1_red_29_23504007
LG2.b.331.20	Both	-2818.08738958008	-2816.72823069676	2	331	20	350	1489	104738034	23051863	23058769	1508	106078873	24392702	24399608	1340839	2.7183177666393	0.0992025166014225	23722282.5	105408453.5	23729188.5	cela1_red_29_23058769	cela1_red_29_24399608
LG2.b.331.20	Male	-884.660022510167	-884.660024377695	2	331	20	350	1489	104738034	23051863	23058769	1508	106078873	24392702	24399608	1340839	-3.73505622519588e-06	1	23722282.5	105408453.5	23729188.5	cela1_red_29_23058769	cela1_red_29_24399608
LG2.b.331.20	Female	-1896.60030708662	-1893.41069430524	2	331	20	350	1489	104738034	23051863	23058769	1508	106078873	24392702	24399608	1340839	6.37922556275953	0.0115463802961487	23722282.5	105408453.5	23729188.5	cela1_red_29_23058769	cela1_red_29_24399608
LG2.b.341.20	Both	-2818.05446911704	-2818.05447120223	2	341	20	360	1499	105249072	23562901	23569807	1518	106722291	25036120	25043026	1473219	-4.17037699662615e-06	1	24299510.5	105985681.5	24306416.5	cela1_red_29_23569807	cela1_red_29_25043026
LG2.b.341.20	Male	-884.659584701244	-884.659586913908	2	341	20	360	1499	105249072	23562901	23569807	1518	106722291	25036120	25043026	1473219	-4.42532632405346e-06	1	24299510.5	105985681.5	24306416.5	cela1_red_29_23569807	cela1_red_29_25043026
LG2.b.341.20	Female	-1896.570697795	-1896.32696507122	2	341	20	360	1499	105249072	23562901	23569807	1518	106722291	25036120	25043026	1473219	0.487465447561135	0.485060093875952	24299510.5	105985681.5	24306416.5	cela1_red_29_23569807	cela1_red_29_25043026
LG2.b.351.20	Both	-2818.05164448862	-2818.05164732556	2	351	20	370	1509	106156609	24470438	24477344	1528	107648216	25962045	25968951	1491607	-5.67386996408459e-06	1	25216241.5	106902412.5	25223147.5	cela1_red_29_24477344	cela1_red_29_25968951
LG2.b.351.20	Male	-884.660671764651	-884.660672500771	2	351	20	370	1509	106156609	24470438	24477344	1528	107648216	25962045	25968951	1491607	-1.47223886415304e-06	1	25216241.5	106902412.5	25223147.5	cela1_red_29_24477344	cela1_red_29_25968951
LG2.b.351.20	Female	-1896.56473058568	-1896.56473212453	2	351	20	370	1509	106156609	24470438	24477344	1528	107648216	25962045	25968951	1491607	-3.07769869323238e-06	1	25216241.5	106902412.5	25223147.5	cela1_red_29_24477344	cela1_red_29_25968951
LG2.b.361.20	Both	-2818.05215249368	-2818.05215514393	2	361	20	380	1519	106798841	25112670	25119576	1538	108406013	26719842	26726748	1607172	-5.30050692759687e-06	1	25916256	107602427	25923162	cela1_red_29_25119576	cela1_red_29_26726748
LG2.b.361.20	Male	-884.659729885731	-884.659732043784	2	361	20	380	1519	106798841	25112670	25119576	1538	108406013	26719842	26726748	1607172	-4.31610624218592e-06	1	25916256	107602427	25923162	cela1_red_29_25119576	cela1_red_29_26726748
LG2.b.361.20	Female	-1896.56431829416	-1896.5643202657	2	361	20	380	1519	106798841	25112670	25119576	1538	108406013	26719842	26726748	1607172	-3.94307562601171e-06	1	25916256	107602427	25923162	cela1_red_29_25119576	cela1_red_29_26726748
LG2.b.371.20	Both	-2818.04799138776	-2818.04799700512	2	371	20	390	1529	107783806	26097635	26104541	1548	108801465	27115294	27122200	1017659	-1.1234719750064e-05	1	26606464.5	108292635.5	26613370.5	cela1_red_29_26104541	cela1_red_29_27122200
LG2.b.371.20	Male	-884.65844708934	-884.658451112054	2	371	20	390	1529	107783806	26097635	26104541	1548	108801465	27115294	27122200	1017659	-8.0454274211661e-06	1	26606464.5	108292635.5	26613370.5	cela1_red_29_26104541	cela1_red_29_27122200
LG2.b.371.20	Female	-1896.56272862272	-1896.56273195469	2	371	20	390	1529	107783806	26097635	26104541	1548	108801465	27115294	27122200	1017659	-6.66394635118195e-06	1	26606464.5	108292635.5	26613370.5	cela1_red_29_26104541	cela1_red_29_27122200
LG2.b.381.20	Both	-2818.05547455611	-2818.05547532196	2	381	20	400	1539	108518986	26832815	26839721	1558	110243590	28557419	28564325	1724604	-1.53169821714982e-06	1	27695117	109381288	27702023	cela1_red_29_26839721	cela1_red_29_28564325
LG2.b.381.20	Male	-884.661386669674	-884.653795887786	2	381	20	400	1539	108518986	26832815	26839721	1558	110243590	28557419	28564325	1724604	0.0151815637768777	0.901938044587684	27695117	109381288	27702023	cela1_red_29_26839721	cela1_red_29_28564325
LG2.b.381.20	Female	-1896.5653445398	-1896.5653454774	2	381	20	400	1539	108518986	26832815	26839721	1558	110243590	28557419	28564325	1724604	-1.875211182778e-06	1	27695117	109381288	27702023	cela1_red_29_26839721	cela1_red_29_28564325
LG2.b.391.20	Both	-2818.05680544056	-2818.05011270852	2	391	20	410	1549	108843647	27157476	27164382	1568	110898191	29212020	29218926	2054544	0.0133854640653226	0.907893820222803	28184748	109870919	28191654	cela1_red_29_27164382	cela1_red_29_29218926
LG2.b.391.20	Male	-884.665302192595	-883.1477701569	2	391	20	410	1549	108843647	27157476	27164382	1568	110898191	29212020	29218926	2054544	3.03506407139025	0.0814833326521468	28184748	109870919	28191654	cela1_red_29_27164382	cela1_red_29_29218926
LG2.b.391.20	Female	-1896.56991039219	-1896.44942226412	2	391	20	410	1549	108843647	27157476	27164382	1568	110898191	29212020	29218926	2054544	0.24097625613831	0.623501898661601	28184748	109870919	28191654	cela1_red_29_27164382	cela1_red_29_29218926
LG2.b.401.20	Both	-2818.05493632248	-2818.05493857326	2	401	20	420	1559	110266748	28580577	28587483	1578	111828677	30142506	30149412	1561929	-4.50156130682444e-06	1	29361541.5	111047712.5	29368447.5	cela1_red_29_28587483	cela1_red_29_30149412
LG2.b.401.20	Male	-884.664486472487	-883.638301833821	2	401	20	420	1559	110266748	28580577	28587483	1578	111828677	30142506	30149412	1561929	2.05236927733199	0.151969535394079	29361541.5	111047712.5	29368447.5	cela1_red_29_28587483	cela1_red_29_30149412
LG2.b.401.20	Female	-1896.58003498952	-1895.68387215927	2	401	20	420	1559	110266748	28580577	28587483	1578	111828677	30142506	30149412	1561929	1.79232566048313	0.180643060984775	29361541.5	111047712.5	29368447.5	cela1_red_29_28587483	cela1_red_29_30149412
LG2.b.411.20	Both	-2818.05379203752	-2818.05379326888	2	411	20	430	1569	111011603	29325432	29332338	1588	112865476	31179305	31186211	1853873	-2.46272975346074e-06	1	30252368.5	111938539.5	30259274.5	cela1_red_29_29332338	cela1_red_29_31186211
LG2.b.411.20	Male	-884.661157301273	-884.661106164269	2	411	20	430	1569	111011603	29325432	29332338	1588	112865476	31179305	31186211	1853873	0.000102274007531378	0.991931082118922	30252368.5	111938539.5	30259274.5	cela1_red_29_29332338	cela1_red_29_31186211
LG2.b.411.20	Female	-1896.57840231128	-1895.9540770618	2	411	20	430	1569	111011603	29325432	29332338	1588	112865476	31179305	31186211	1853873	1.2486504989588	0.263810381258893	30252368.5	111938539.5	30259274.5	cela1_red_29_29332338	cela1_red_29_31186211
LG2.b.421.20	Both	-2818.04379715393	-2818.04380400031	2	421	20	440	1579	111996042	30309871	30316777	1598	113378544	31692373	31699279	1382502	-1.36927728817682e-05	1	31001122	112687293	31008028	cela1_red_29_30316777	cela1_red_29_31699279
LG2.b.421.20	Male	-884.659701882719	-884.659703549478	2	421	20	440	1579	111996042	30309871	30316777	1598	113378544	31692373	31699279	1382502	-3.33351931658399e-06	1	31001122	112687293	31008028	cela1_red_29_30316777	cela1_red_29_31699279
LG2.b.421.20	Female	-1896.56470058359	-1896.56470480092	2	421	20	440	1579	111996042	30309871	30316777	1598	113378544	31692373	31699279	1382502	-8.43467387312558e-06	1	31001122	112687293	31008028	cela1_red_29_30316777	cela1_red_29_31699279
LG2.b.431.20	Both	-2818.03959131724	-2818.03960111504	2	431	20	450	1589	112918322	31232151	31239057	1608	113960966	32274795	32281701	1042644	-1.95955944946036e-05	1	31753473	113439644	31760379	cela1_red_29_31239057	cela1_red_29_32281701
LG2.b.431.20	Male	-884.661137632098	-884.661137702846	2	431	20	450	1589	112918322	31232151	31239057	1608	113960966	32274795	32281701	1042644	-1.41496229844051e-07	1	31753473	113439644	31760379	cela1_red_29_31239057	cela1_red_29_32281701
LG2.b.431.20	Female	-1896.55916959156	-1896.55917508375	2	431	20	450	1589	112918322	31232151	31239057	1608	113960966	32274795	32281701	1042644	-1.09843626887596e-05	1	31753473	113439644	31760379	cela1_red_29_31239057	cela1_red_29_32281701
LG2.b.441.20	Both	-2818.04871270673	-2818.04871771493	2	441	20	460	1599	113422651	31736480	31743386	1618	114539366	32853195	32860101	1116715	-1.00163997558411e-05	1	32294837.5	113981008.5	32301743.5	cela1_red_29_31743386	cela1_red_29_32860101
LG2.b.441.20	Male	-884.661020516891	-884.661020638001	2	441	20	460	1599	113422651	31736480	31743386	1618	114539366	32853195	32860101	1116715	-2.42220494328649e-07	1	32294837.5	113981008.5	32301743.5	cela1_red_29_31743386	cela1_red_29_32860101
LG2.b.441.20	Female	-1896.56210140028	-1896.56210529195	2	441	20	460	1599	113422651	31736480	31743386	1618	114539366	32853195	32860101	1116715	-7.78334515416645e-06	1	32294837.5	113981008.5	32301743.5	cela1_red_29_31743386	cela1_red_29_32860101
LG2.b.451.20	Both	-2818.05287789413	-2818.05287987778	2	451	20	470	1609	114046296	32360125	32367031	1628	115157773	33471602	33478508	1111477	-3.96729592466727e-06	1	32915863.5	114602034.5	32922769.5	cela1_red_29_32367031	cela1_red_29_33478508
LG2.b.451.20	Male	-884.662285073793	-884.340888996503	2	451	20	470	1609	114046296	32360125	32367031	1628	115157773	33471602	33478508	1111477	0.642792154579638	0.422701522463669	32915863.5	114602034.5	32922769.5	cela1_red_29_32367031	cela1_red_29_33478508
LG2.b.451.20	Female	-1896.56522569146	-1896.5652268145	2	451	20	470	1609	114046296	32360125	32367031	1628	115157773	33471602	33478508	1111477	-2.24607310883584e-06	1	32915863.5	114602034.5	32922769.5	cela1_red_29_32367031	cela1_red_29_33478508
LG2.b.461.20	Both	-2818.05057045224	-2818.05057383752	2	461	20	480	1619	114709071	33022900	33029806	1638	115964686	34278515	34285421	1255615	-6.77055868436582e-06	1	33650707.5	115336878.5	33657613.5	cela1_red_29_33029806	cela1_red_29_34285421
LG2.b.461.20	Male	-884.663453003257	-884.028036260376	2	461	20	480	1619	114709071	33022900	33029806	1638	115964686	34278515	34285421	1255615	1.27083348576048	0.259610376771316	33650707.5	115336878.5	33657613.5	cela1_red_29_33029806	cela1_red_29_34285421
LG2.b.461.20	Female	-1896.56378427601	-1896.56378652812	2	461	20	480	1619	114709071	33022900	33029806	1638	115964686	34278515	34285421	1255615	-4.50422840003739e-06	1	33650707.5	115336878.5	33657613.5	cela1_red_29_33029806	cela1_red_29_34285421
LG2.b.471.20	Both	-2818.051606332	-2818.05160924233	2	471	20	490	1629	115199992	33513821	33520727	1648	118194223	36508052	36514958	2994231	-5.82066422794014e-06	1	35010936.5	116697107.5	35017842.5	cela1_red_29_33520727	cela1_red_29_36514958
LG2.b.471.20	Male	-884.660902372607	-884.660904168038	2	471	20	490	1629	115199992	33513821	33520727	1648	118194223	36508052	36514958	2994231	-3.59086220669269e-06	1	35010936.5	116697107.5	35017842.5	cela1_red_29_33520727	cela1_red_29_36514958
LG2.b.471.20	Female	-1896.56128035753	-1896.56128509053	2	471	20	490	1629	115199992	33513821	33520727	1648	118194223	36508052	36514958	2994231	-9.46598947848543e-06	1	35010936.5	116697107.5	35017842.5	cela1_red_29_33520727	cela1_red_29_36514958
LG2.b.481.20	Both	-2818.0579440105	-2818.04533731803	2	481	20	500	1639	116120564	34434393	34441299	1658	118849510	37163339	37170245	2728946	0.0252133849353413	0.87383650884289	35798866	117485037	35805772	cela1_red_29_34441299	cela1_red_29_37170245
LG2.b.481.20	Male	-884.660109064939	-884.660110780513	2	481	20	500	1639	116120564	34434393	34441299	1658	118849510	37163339	37170245	2728946	-3.43114857059845e-06	1	35798866	117485037	35805772	cela1_red_29_34441299	cela1_red_29_37170245
LG2.b.481.20	Female	-1896.56099171244	-1896.56099709017	2	481	20	500	1639	116120564	34434393	34441299	1658	118849510	37163339	37170245	2728946	-1.0755469702417e-05	1	35798866	117485037	35805772	cela1_red_29_34441299	cela1_red_29_37170245
LG2.b.491.20	Both	-2818.05503784809	-2818.055038356	2	491	20	510	1649	118304370	36618199	36625105	1668	119556579	37870408	37877314	1252209	-1.01581190392608e-06	1	37244303.5	118930474.5	37251209.5	cela1_red_29_36625105	cela1_red_29_37877314
LG2.b.491.20	Male	-884.65981294357	-884.659814910402	2	491	20	510	1649	118304370	36618199	36625105	1668	119556579	37870408	37877314	1252209	-3.93366440221143e-06	1	37244303.5	118930474.5	37251209.5	cela1_red_29_36625105	cela1_red_29_37877314
LG2.b.491.20	Female	-1896.56074252606	-1896.56074753544	2	491	20	510	1649	118304370	36618199	36625105	1668	119556579	37870408	37877314	1252209	-1.00187608040869e-05	1	37244303.5	118930474.5	37251209.5	cela1_red_29_36625105	cela1_red_29_37877314
LG2.b.501.20	Both	-2818.04132659356	-2818.04133587043	2	501	20	520	1659	118883473	37197302	37204208	1678	121195665	39509494	40831858	2312192	-1.85537264769664e-05	1	38353398	120039569	39018033	cela1_red_29_37204208	cela1_red_29_40831858
LG2.b.501.20	Male	-884.65907900306	-884.659081730288	2	501	20	520	1659	118883473	37197302	37204208	1678	121195665	39509494	40831858	2312192	-5.45445618627127e-06	1	38353398	120039569	39018033	cela1_red_29_37204208	cela1_red_29_40831858
LG2.b.501.20	Female	-1896.55688224669	-1896.55688982078	2	501	20	520	1659	118883473	37197302	37204208	1678	121195665	39509494	40831858	2312192	-1.51481995089853e-05	1	38353398	120039569	39018033	cela1_red_29_37204208	cela1_red_29_40831858
LG2.b.511.20	Both	-2818.03897672656	-2818.03898698899	2	511	20	530	1669	119601432	37915261	37922167	1688	121944982	40258811	41581175	2343550	-2.05248725251295e-05	1	39087036	120773207	39751671	cela1_red_29_37922167	cela1_red_29_41581175
LG2.b.511.20	Male	-884.659198413013	-884.659200775101	2	511	20	530	1669	119601432	37915261	37922167	1688	121944982	40258811	41581175	2343550	-4.72417696073535e-06	1	39087036	120773207	39751671	cela1_red_29_37922167	cela1_red_29_41581175
LG2.b.511.20	Female	-1896.55499278356	-1896.55500141131	2	511	20	530	1669	119601432	37915261	37922167	1688	121944982	40258811	41581175	2343550	-1.7255486909562e-05	1	39087036	120773207	39751671	cela1_red_29_37922167	cela1_red_29_41581175
LG2.b.521.20	Both	-2818.04279006249	-2818.04279872546	2	521	20	540	1679	121214074	39527903	40850267	1698	122301831	40615660	41938024	1087757	-1.73259295479511e-05	1	40071781.5	121757952.5	41394145.5	cela1_red_29_40850267	cela1_red_29_41938024
LG2.b.521.20	Male	-884.659944233234	-884.659945867393	2	521	20	540	1679	121214074	39527903	40850267	1698	122301831	40615660	41938024	1087757	-3.26831741404021e-06	1	40071781.5	121757952.5	41394145.5	cela1_red_29_40850267	cela1_red_29_41938024
LG2.b.521.20	Female	-1896.55639804334	-1896.55640619631	2	521	20	540	1679	121214074	39527903	40850267	1698	122301831	40615660	41938024	1087757	-1.6305936696881e-05	1	40071781.5	121757952.5	41394145.5	cela1_red_29_40850267	cela1_red_29_41938024
LG2.b.531.20	Both	-2818.04299979248	-2818.0430089766	2	531	20	550	1689	121946489	40260318	41582682	1708	123373535	41687364	43009728	1427046	-1.8368240489508e-05	1	40973841	122660012	42296205	cela1_red_29_41582682	cela1_red_29_43009728
LG2.b.531.20	Male	-884.660091905288	-884.660093555759	2	531	20	550	1689	121946489	40260318	41582682	1708	123373535	41687364	43009728	1427046	-3.30094098899281e-06	1	40973841	122660012	42296205	cela1_red_29_41582682	cela1_red_29_43009728
LG2.b.531.20	Female	-1896.55827275843	-1896.55827999061	2	531	20	550	1689	121946489	40260318	41582682	1708	123373535	41687364	43009728	1427046	-1.44643531712063e-05	1	40973841	122660012	42296205	cela1_red_29_41582682	cela1_red_29_43009728
LG2.b.541.20	Both	-2818.03923905745	-2818.03925054862	2	541	20	560	1699	122421661	40735490	42057854	1718	124139766	42453595	43775959	1718105	-2.29823417612351e-05	1	41594542.5	123280713.5	42916906.5	cela1_red_29_42057854	cela1_red_29_43775959
LG2.b.541.20	Male	-884.659784009477	-884.659786035089	2	541	20	560	1699	122421661	40735490	42057854	1718	124139766	42453595	43775959	1718105	-4.05122523261525e-06	1	41594542.5	123280713.5	42916906.5	cela1_red_29_42057854	cela1_red_29_43775959
LG2.b.541.20	Female	-1896.55800145446	-1896.55800871329	2	541	20	560	1699	122421661	40735490	42057854	1718	124139766	42453595	43775959	1718105	-1.45176645673928e-05	1	41594542.5	123280713.5	42916906.5	cela1_red_29_42057854	cela1_red_29_43775959
LG2.b.551.20	Both	-2818.03996343216	-2818.03997508827	2	551	20	570	1709	123446373	41760202	43082566	1728	124951947	43265776	44588140	1505574	-2.33122118515894e-05	1	42512989	124199160	43835353	cela1_red_29_43082566	cela1_red_29_44588140
LG2.b.551.20	Male	-884.659441095125	-884.659443726905	2	551	20	570	1709	123446373	41760202	43082566	1728	124951947	43265776	44588140	1505574	-5.26355847796367e-06	1	42512989	124199160	43835353	cela1_red_29_43082566	cela1_red_29_44588140
LG2.b.551.20	Female	-1896.55829183451	-1896.55829931448	2	551	20	570	1709	123446373	41760202	43082566	1728	124951947	43265776	44588140	1505574	-1.49599413816759e-05	1	42512989	124199160	43835353	cela1_red_29_43082566	cela1_red_29_44588140
LG2.b.561.20	Both	-2818.0387824581	-2818.0387957114	2	561	20	580	1719	124244294	42558123	43880487	1738	125808380	44122209	45444573	1564086	-2.65065946223331e-05	1	43340166	125026337	44662530	cela1_red_29_43880487	cela1_red_29_45444573
LG2.b.561.20	Male	-884.658722842617	-884.65872677384	2	561	20	580	1719	124244294	42558123	43880487	1738	125808380	44122209	45444573	1564086	-7.86244663686375e-06	1	43340166	125026337	44662530	cela1_red_29_43880487	cela1_red_29_45444573
LG2.b.561.20	Female	-1896.55635174131	-1896.55636150214	2	561	20	580	1719	124244294	42558123	43880487	1738	125808380	44122209	45444573	1564086	-1.95216534848441e-05	1	43340166	125026337	44662530	cela1_red_29_43880487	cela1_red_29_45444573
LG2.b.571.20	Both	-2818.04145550272	-2818.04146657816	2	571	20	590	1729	125067398	43381227	44703591	1748	126379462	44693291	46015655	1312064	-2.21508807953796e-05	1	44037259	125723430	45359623	cela1_red_29_44703591	cela1_red_29_46015655
LG2.b.571.20	Male	-884.661791788997	-884.635333235983	2	571	20	590	1729	125067398	43381227	44703591	1748	126379462	44693291	46015655	1312064	0.0529171060275075	0.818062875737513	44037259	125723430	45359623	cela1_red_29_44703591	cela1_red_29_46015655
LG2.b.571.20	Female	-1896.55557727554	-1896.55558769487	2	571	20	590	1729	125067398	43381227	44703591	1748	126379462	44693291	46015655	1312064	-2.08386591111775e-05	1	44037259	125723430	45359623	cela1_red_29_44703591	cela1_red_29_46015655
LG2.b.581.20	Both	-2818.05167276138	-2818.0516761495	2	581	20	600	1739	125892794	44206623	45528987	1758	126886125	45199954	46522318	993331	-6.77622938383138e-06	1	44703288.5	126389459.5	46025652.5	cela1_red_29_45528987	cela1_red_29_46522318
LG2.b.581.20	Male	-884.667953642106	-883.100692904354	2	581	20	600	1739	125892794	44206623	45528987	1758	126886125	45199954	46522318	993331	3.13452147550288	0.0766508776376169	44703288.5	126389459.5	46025652.5	cela1_red_29_45528987	cela1_red_29_46522318
LG2.b.581.20	Female	-1896.55880974816	-1896.55881766174	2	581	20	600	1739	125892794	44206623	45528987	1758	126886125	45199954	46522318	993331	-1.58271727741521e-05	1	44703288.5	126389459.5	46025652.5	cela1_red_29_45528987	cela1_red_29_46522318
LG2.b.591.20	Both	-2818.05047970028	-2818.05048398775	2	591	20	610	1749	126400667	44714496	46036860	1768	127515159	45828988	47151352	1114492	-8.57493068906479e-06	1	45271742	126957913	46594106	cela1_red_29_46036860	cela1_red_29_47151352
LG2.b.591.20	Male	-884.666334156343	-883.572066821283	2	591	20	610	1749	126400667	44714496	46036860	1768	127515159	45828988	47151352	1114492	2.18853467012013	0.139041537215487	45271742	126957913	46594106	cela1_red_29_46036860	cela1_red_29_47151352
LG2.b.591.20	Female	-1896.56164588212	-1896.5616506626	2	591	20	610	1749	126400667	44714496	46036860	1768	127515159	45828988	47151352	1114492	-9.56096391746541e-06	1	45271742	126957913	46594106	cela1_red_29_46036860	cela1_red_29_47151352
LG2.b.601.20	Both	-2818.04468875049	-2818.04469909028	2	601	20	620	1759	126923841	45237670	46560034	1778	128122022	46435851	47758215	1198181	-2.0679583940364e-05	1	45836760.5	127522931.5	47159124.5	cela1_red_29_46560034	cela1_red_29_47758215
LG2.b.601.20	Male	-884.661980589849	-884.642166935364	2	601	20	620	1759	126923841	45237670	46560034	1778	128122022	46435851	47758215	1198181	0.0396273089704664	0.842211045059481	45836760.5	127522931.5	47159124.5	cela1_red_29_46560034	cela1_red_29_47758215
LG2.b.601.20	Female	-1896.56149924688	-1896.56150518991	2	601	20	620	1759	126923841	45237670	46560034	1778	128122022	46435851	47758215	1198181	-1.18860657494224e-05	1	45836760.5	127522931.5	47159124.5	cela1_red_29_46560034	cela1_red_29_47758215
LG2.b.610.20	Both	-2818.04900781452	-2818.04901946271	2	610	20	629	1768	127515159	45828988	47151352	1787	128604964	46918793	48241157	1089805	-2.32963775488315e-05	1	46373890.5	128060061.5	47696254.5	cela1_red_29_47151352	cela1_red_29_48241157
LG2.b.610.20	Male	-884.661816670038	-884.635756461286	2	610	20	629	1768	127515159	45828988	47151352	1787	128604964	46918793	48241157	1089805	0.0521204175029197	0.819413828984788	46373890.5	128060061.5	47696254.5	cela1_red_29_47151352	cela1_red_29_48241157
LG2.b.610.20	Female	-1896.56315857408	-1896.56316598058	2	610	20	629	1768	127515159	45828988	47151352	1787	128604964	46918793	48241157	1089805	-1.4813007965131e-05	1	46373890.5	128060061.5	47696254.5	cela1_red_29_47151352	cela1_red_29_48241157
LG3.b.1.20	Both	-2818.06096283821	-2817.93995510914	3	1	20	20	1822	132036120	1033920	1181011	1841	133341595	2339395	2486486	1305475	0.242015458139576	0.622754219398919	1686657.5	132688857.5	1833748.5	cela1_red_5_1181011	cela1_red_5_2486486
LG3.b.1.20	Male	-884.658763639938	-884.658766959685	3	1	20	20	1822	132036120	1033920	1181011	1841	133341595	2339395	2486486	1305475	-6.63949526824581e-06	1	1686657.5	132688857.5	1833748.5	cela1_red_5_1181011	cela1_red_5_2486486
LG3.b.1.20	Female	-1896.56496868736	-1896.56497021104	3	1	20	20	1822	132036120	1033920	1181011	1841	133341595	2339395	2486486	1305475	-3.04735112877097e-06	1	1686657.5	132688857.5	1833748.5	cela1_red_5_1181011	cela1_red_5_2486486
LG3.b.11.20	Both	-2818.05167715956	-2818.05167876871	3	11	20	30	1832	132803373	1801173	1948264	1851	134134189	3131989	3279080	1330816	-3.2182970244321e-06	1	2466581	133468781	2613672	cela1_red_5_1948264	cela1_red_5_3279080
LG3.b.11.20	Male	-884.658957970157	-884.658961315994	3	11	20	30	1832	132803373	1801173	1948264	1851	134134189	3131989	3279080	1330816	-6.69167479827593e-06	1	2466581	133468781	2613672	cela1_red_5_1948264	cela1_red_5_3279080
LG3.b.11.20	Female	-1896.56325617557	-1896.5632747952	3	11	20	30	1832	132803373	1801173	1948264	1851	134134189	3131989	3279080	1330816	-3.72392642020714e-05	1	2466581	133468781	2613672	cela1_red_5_1948264	cela1_red_5_3279080
LG3.b.21.20	Both	-2818.04938184448	-2818.04941072812	3	21	20	40	1842	133427355	2425155	2572246	1861	134506529	3504329	3651420	1079174	-5.77672890358372e-05	1	2964742	133966942	3111833	cela1_red_5_2572246	cela1_red_5_3651420
LG3.b.21.20	Male	-884.658209564999	-884.658214326537	3	21	20	40	1842	133427355	2425155	2572246	1861	134506529	3504329	3651420	1079174	-9.52307618717896e-06	1	2964742	133966942	3111833	cela1_red_5_2572246	cela1_red_5_3651420
LG3.b.21.20	Female	-1896.563303669	-1896.56330610193	3	21	20	40	1842	133427355	2425155	2572246	1861	134506529	3504329	3651420	1079174	-4.86586168335634e-06	1	2964742	133966942	3111833	cela1_red_5_2572246	cela1_red_5_3651420
LG3.b.31.20	Both	-2818.05405829444	-2818.05406056449	3	31	20	50	1852	134178009	3175809	3322900	1871	135156773	4154573	4301664	978764	-4.54009477834916e-06	1	3665191	134667391	3812282	cela1_red_5_3322900	cela1_red_5_4301664
LG3.b.31.20	Male	-884.658908329082	-884.658911654099	3	31	20	50	1852	134178009	3175809	3322900	1871	135156773	4154573	4301664	978764	-6.65003244648688e-06	1	3665191	134667391	3812282	cela1_red_5_3322900	cela1_red_5_4301664
LG3.b.31.20	Female	-1896.56561405629	-1896.56561579738	3	31	20	50	1852	134178009	3175809	3322900	1871	135156773	4154573	4301664	978764	-3.48216917700483e-06	1	3665191	134667391	3812282	cela1_red_5_3322900	cela1_red_5_4301664
LG3.b.41.20	Both	-2818.05906749286	-2818.01757118321	3	41	20	60	1862	134539340	3537140	3684231	1881	135647364	4645164	4792255	1108024	0.0829926193036954	0.773282136610366	4091152	135093352	4238243	cela1_red_5_3684231	cela1_red_5_4792255
LG3.b.41.20	Male	-884.659374791744	-884.659377441583	3	41	20	60	1862	134539340	3537140	3684231	1881	135647364	4645164	4792255	1108024	-5.29967746842885e-06	1	4091152	135093352	4238243	cela1_red_5_3684231	cela1_red_5_4792255
LG3.b.41.20	Female	-1896.57249015412	-1896.34944820936	3	41	20	60	1862	134539340	3537140	3684231	1881	135647364	4645164	4792255	1108024	0.446083889532019	0.504200543508852	4091152	135093352	4238243	cela1_red_5_3684231	cela1_red_5_4792255
LG3.b.51.20	Both	-2818.05184159107	-2818.05184461543	3	51	20	70	1872	135162988	4160788	4307879	1891	136411083	5408883	5555974	1248095	-6.048719114915e-06	1	4784835.5	135787035.5	4931926.5	cela1_red_5_4307879	cela1_red_5_5555974
LG3.b.51.20	Male	-884.659876578978	-884.659878491914	3	51	20	70	1872	135162988	4160788	4307879	1891	136411083	5408883	5555974	1248095	-3.82587313652039e-06	1	4784835.5	135787035.5	4931926.5	cela1_red_5_4307879	cela1_red_5_5555974
LG3.b.51.20	Female	-1896.56906586335	-1896.53838285826	3	51	20	70	1872	135162988	4160788	4307879	1891	136411083	5408883	5555974	1248095	0.0613660101903406	0.804349788483136	4784835.5	135787035.5	4931926.5	cela1_red_5_4307879	cela1_red_5_5555974
LG3.b.61.20	Both	-2818.04832773213	-2818.04833317415	3	61	20	80	1882	135684810	4682610	4829701	1901	136784648	5782448	5929539	1099838	-1.08840413304279e-05	1	5232529	136234729	5379620	cela1_red_5_4829701	cela1_red_5_5929539
LG3.b.61.20	Male	-884.661272896909	-884.661231564785	3	61	20	80	1882	135684810	4682610	4829701	1901	136784648	5782448	5929539	1099838	8.26642485662887e-05	0.992745742970825	5232529	136234729	5379620	cela1_red_5_4829701	cela1_red_5_5929539
LG3.b.61.20	Female	-1896.56243614262	-1896.56243982485	3	61	20	80	1882	135684810	4682610	4829701	1901	136784648	5782448	5929539	1099838	-7.3644582698762e-06	1	5232529	136234729	5379620	cela1_red_5_4829701	cela1_red_5_5929539
LG3.b.71.20	Both	-2818.04698965137	-2818.04700853687	3	71	20	90	1892	136461486	5459286	5606377	1911	137578397	6576197	6723288	1116911	-3.77710020984523e-05	1	6017741.5	137019941.5	6164832.5	cela1_red_5_5606377	cela1_red_5_6723288
LG3.b.71.20	Male	-884.660326293071	-884.660326844398	3	71	20	90	1892	136461486	5459286	5606377	1911	137578397	6576197	6723288	1116911	-1.10265273178811e-06	1	6017741.5	137019941.5	6164832.5	cela1_red_5_5606377	cela1_red_5_6723288
LG3.b.71.20	Female	-1896.56102389041	-1896.56102932181	3	71	20	90	1892	136461486	5459286	5606377	1911	137578397	6576197	6723288	1116911	-1.08627950794471e-05	1	6017741.5	137019941.5	6164832.5	cela1_red_5_5606377	cela1_red_5_6723288
LG3.b.81.20	Both	-2818.04441883627	-2818.0444275321	3	81	20	100	1902	136995112	5992912	6140003	1921	138360133	7357933	7505024	1365021	-1.73916650965111e-05	1	6675422.5	137677622.5	6822513.5	cela1_red_5_6140003	cela1_red_5_7505024
LG3.b.81.20	Male	-884.659843997555	-884.659846044207	3	81	20	100	1902	136995112	5992912	6140003	1921	138360133	7357933	7505024	1365021	-4.0933036871138e-06	1	6675422.5	137677622.5	6822513.5	cela1_red_5_6140003	cela1_red_5_7505024
LG3.b.81.20	Female	-1896.56017283836	-1896.56017881299	3	81	20	100	1902	136995112	5992912	6140003	1921	138360133	7357933	7505024	1365021	-1.19492524390807e-05	1	6675422.5	137677622.5	6822513.5	cela1_red_5_6140003	cela1_red_5_7505024
LG3.b.91.20	Both	-2818.06010903064	-2817.99423997841	3	91	20	110	1912	137616619	6614419	6761510	1931	139010231	8008031	8155122	1393612	0.131738104472788	0.716636676089988	7311225	138313425	7458316	cela1_red_5_6761510	cela1_red_5_8155122
LG3.b.91.20	Male	-884.662180556194	-884.588444231714	3	91	20	110	1912	137616619	6614419	6761510	1931	139010231	8008031	8155122	1393612	0.147472648960274	0.700962380593259	7311225	138313425	7458316	cela1_red_5_6761510	cela1_red_5_8155122
LG3.b.91.20	Female	-1896.56874837712	-1896.52987813628	3	91	20	110	1912	137616619	6614419	6761510	1931	139010231	8008031	8155122	1393612	0.0777404816913077	0.78038311746715	7311225	138313425	7458316	cela1_red_5_6761510	cela1_red_5_8155122
LG3.b.101.20	Both	-2818.05528596065	-2818.05528635263	3	101	20	120	1922	138472191	7469991	7617082	1941	139619231	8617031	8764122	1147040	-7.83956238592509e-07	1	8043511	139045711	8190602	cela1_red_5_7617082	cela1_red_5_8764122
LG3.b.101.20	Male	-884.661858785624	-884.620713597227	3	101	20	120	1922	138472191	7469991	7617082	1941	139619231	8617031	8764122	1147040	0.0822903767937078	0.774217227345366	8043511	139045711	8190602	cela1_red_5_7617082	cela1_red_5_8764122
LG3.b.101.20	Female	-1896.56567309084	-1896.56567676557	3	101	20	120	1922	138472191	7469991	7617082	1941	139619231	8617031	8764122	1147040	-7.34947116143303e-06	1	8043511	139045711	8190602	cela1_red_5_7617082	cela1_red_5_8764122
LG3.b.111.20	Both	-2818.04775319892	-2818.04775953135	3	111	20	130	1932	139201638	8199438	8346529	1951	140286847	9284647	9431738	1085209	-1.26648592413403e-05	1	8742042.5	139744242.5	8889133.5	cela1_red_5_8346529	cela1_red_5_9431738
LG3.b.111.20	Male	-884.658961404007	-884.658964841775	3	111	20	130	1932	139201638	8199438	8346529	1951	140286847	9284647	9431738	1085209	-6.87553574607591e-06	1	8742042.5	139744242.5	8889133.5	cela1_red_5_8346529	cela1_red_5_9431738
LG3.b.111.20	Female	-1896.56359959493	-1896.56360254202	3	111	20	130	1932	139201638	8199438	8346529	1951	140286847	9284647	9431738	1085209	-5.89419823882054e-06	1	8742042.5	139744242.5	8889133.5	cela1_red_5_8346529	cela1_red_5_9431738
LG3.b.121.20	Both	-2818.07129299521	-2817.50773792145	3	121	20	140	1942	139661130	8658930	8806021	1961	140793627	9791427	9938518	1132497	1.12711014752313	0.288392590072215	9225178.5	140227378.5	9372269.5	cela1_red_5_8806021	cela1_red_5_9938518
LG3.b.121.20	Male	-884.659725656473	-884.659727805661	3	121	20	140	1942	139661130	8658930	8806021	1961	140793627	9791427	9938518	1132497	-4.29837450610648e-06	1	9225178.5	140227378.5	9372269.5	cela1_red_5_8806021	cela1_red_5_9938518
LG3.b.121.20	Female	-1896.57796260317	-1895.89613632707	3	121	20	140	1942	139661130	8658930	8806021	1961	140793627	9791427	9938518	1132497	1.36365255221472	0.2429054641355	9225178.5	140227378.5	9372269.5	cela1_red_5_8806021	cela1_red_5_9938518
LG3.b.131.20	Both	-2818.07002988791	-2817.39287650933	3	131	20	150	1952	140304782	9302582	9449673	1971	141476853	10474653	10621744	1172071	1.35430675715907	0.244526612555896	9888617.5	140890817.5	10035708.5	cela1_red_5_9449673	cela1_red_5_10621744
LG3.b.131.20	Male	-884.660154806815	-884.660156200861	3	131	20	150	1952	140304782	9302582	9449673	1971	141476853	10474653	10621744	1172071	-2.78809352494136e-06	1	9888617.5	140890817.5	10035708.5	cela1_red_5_9449673	cela1_red_5_10621744
LG3.b.131.20	Female	-1896.57594148726	-1895.9865340862	3	131	20	150	1952	140304782	9302582	9449673	1971	141476853	10474653	10621744	1172071	1.178814802121	0.277597410401708	9888617.5	140890817.5	10035708.5	cela1_red_5_9449673	cela1_red_5_10621744
LG3.b.141.20	Both	-2818.05444771527	-2818.05444877817	3	141	20	160	1962	140832544	9830344	9977435	1981	141887153	10884953	11032044	1054609	-2.12581198866246e-06	1	10357648.5	141359848.5	10504739.5	cela1_red_5_9977435	cela1_red_5_11032044
LG3.b.141.20	Male	-884.661302760711	-884.661180345752	3	141	20	160	1962	140832544	9830344	9977435	1981	141887153	10884953	11032044	1054609	0.000244829918756295	0.987515976295579	10357648.5	141359848.5	10504739.5	cela1_red_5_9977435	cela1_red_5_11032044
LG3.b.141.20	Female	-1896.56566983501	-1896.56567044106	3	141	20	160	1962	140832544	9830344	9977435	1981	141887153	10884953	11032044	1054609	-1.21211087389383e-06	1	10357648.5	141359848.5	10504739.5	cela1_red_5_9977435	cela1_red_5_11032044
LG3.b.151.20	Both	-2818.0550088255	-2818.05501017486	3	151	20	170	1972	141491666	10489466	10636557	1991	142696264	11694064	11841155	1204598	-2.69871907221386e-06	1	11091765	142093965	11238856	cela1_red_5_10636557	cela1_red_5_11841155
LG3.b.151.20	Male	-884.663636646686	-884.366541523187	3	151	20	170	1972	141491666	10489466	10636557	1991	142696264	11694064	11841155	1204598	0.594190246998778	0.440803335279074	11091765	142093965	11238856	cela1_red_5_10636557	cela1_red_5_11841155
LG3.b.151.20	Female	-1896.56480733007	-1896.56481005633	3	151	20	170	1972	141491666	10489466	10636557	1991	142696264	11694064	11841155	1204598	-5.45253078598762e-06	1	11091765	142093965	11238856	cela1_red_5_10636557	cela1_red_5_11841155
LG3.b.161.20	Both	-2818.06064609072	-2817.98548811603	3	161	20	180	1982	141951976	10949776	11096867	2001	143462694	12460494	12607585	1510718	0.150315949380456	0.698233608462579	11705135	142707335	11852226	cela1_red_5_11096867	cela1_red_5_12607585
LG3.b.161.20	Male	-884.663225456135	-884.362405545251	3	161	20	180	1982	141951976	10949776	11096867	2001	143462694	12460494	12607585	1510718	0.601639821767094	0.437953042911275	11705135	142707335	11852226	cela1_red_5_11096867	cela1_red_5_12607585
LG3.b.161.20	Female	-1896.5671373901	-1896.56581055867	3	161	20	180	1982	141951976	10949776	11096867	2001	143462694	12460494	12607585	1510718	0.00265366285975688	0.958916173166115	11705135	142707335	11852226	cela1_red_5_11096867	cela1_red_5_12607585
LG3.b.171.20	Both	-2818.06904104798	-2817.71486065363	3	171	20	190	1992	142747345	11745145	11892236	2011	143987062	12984862	13131953	1239717	0.708360788700702	0.399988527977273	12365003.5	143367203.5	12512094.5	cela1_red_5_11892236	cela1_red_5_13131953
LG3.b.171.20	Male	-884.662543206132	-884.510340468641	3	171	20	190	1992	142747345	11745145	11892236	2011	143987062	12984862	13131953	1239717	0.30440547498165	0.581133674389721	12365003.5	143367203.5	12512094.5	cela1_red_5_11892236	cela1_red_5_13131953
LG3.b.171.20	Female	-1896.56986383979	-1896.51294989972	3	171	20	190	1992	142747345	11745145	11892236	2011	143987062	12984862	13131953	1239717	0.113827880141343	0.735827537552955	12365003.5	143367203.5	12512094.5	cela1_red_5_11892236	cela1_red_5_13131953
LG3.b.181.20	Both	-2818.06540331787	-2817.81501051863	3	181	20	200	2002	143503382	12501182	12648273	2021	144842206	13840006	13987097	1338824	0.500785598493167	0.47915514028397	13170594	144172794	13317685	cela1_red_5_12648273	cela1_red_5_13987097
LG3.b.181.20	Male	-884.662776174456	-884.24321904492	3	181	20	200	2002	143503382	12501182	12648273	2021	144842206	13840006	13987097	1338824	0.839114259073312	0.359650216074975	13170594	144172794	13317685	cela1_red_5_12648273	cela1_red_5_13987097
LG3.b.181.20	Female	-1896.56800956443	-1896.56342985517	3	181	20	200	2002	143503382	12501182	12648273	2021	144842206	13840006	13987097	1338824	0.0091594185073518	0.923754988037657	13170594	144172794	13317685	cela1_red_5_12648273	cela1_red_5_13987097
LG3.b.191.20	Both	-2818.06479950199	-2817.85065383661	3	191	20	210	2012	144050411	13048211	13195302	2031	145672310	14670110	14817201	1621899	0.42829133075702	0.512828559388688	13859160.5	144861360.5	14006251.5	cela1_red_5_13195302	cela1_red_5_14817201
LG3.b.191.20	Male	-884.663217455237	-883.802225829075	3	191	20	210	2012	144050411	13048211	13195302	2031	145672310	14670110	14817201	1621899	1.7219832523233	0.189437956900497	13859160.5	144861360.5	14006251.5	cela1_red_5_13195302	cela1_red_5_14817201
LG3.b.191.20	Female	-1896.56605715698	-1896.56605845887	3	191	20	210	2012	144050411	13048211	13195302	2031	145672310	14670110	14817201	1621899	-2.60379601968452e-06	1	13859160.5	144861360.5	14006251.5	cela1_red_5_13195302	cela1_red_5_14817201
LG3.b.201.20	Both	-2818.06721243378	-2817.7359090467	3	201	20	220	2022	144973338	13971138	14118229	2041	146471240	15469040	15616131	1497902	0.66260677414175	0.415641159696529	14720089	145722289	14867180	cela1_red_5_14118229	cela1_red_5_15616131
LG3.b.201.20	Male	-884.664552490623	-883.392149871949	3	201	20	220	2022	144973338	13971138	14118229	2041	146471240	15469040	15616131	1497902	2.54480523734787	0.11065755558429	14720089	145722289	14867180	cela1_red_5_14118229	cela1_red_5_15616131
LG3.b.201.20	Female	-1896.56527853833	-1896.56528027893	3	201	20	220	2022	144973338	13971138	14118229	2041	146471240	15469040	15616131	1497902	-3.4812046578736e-06	1	14720089	145722289	14867180	cela1_red_5_14118229	cela1_red_5_15616131
LG3.b.211.20	Both	-2818.05907216267	-2817.8653341452	3	211	20	230	2032	145709673	14707473	14854564	2051	146831812	15829612	15976703	1122139	0.387476034937208	0.533629097425108	15268542.5	146270742.5	15415633.5	cela1_red_5_14854564	cela1_red_5_15976703
LG3.b.211.20	Male	-884.663400640584	-884.130336597754	3	211	20	230	2032	145709673	14707473	14854564	2051	146831812	15829612	15976703	1122139	1.06612808565978	0.3018216601746	15268542.5	146270742.5	15415633.5	cela1_red_5_14854564	cela1_red_5_15976703
LG3.b.211.20	Female	-1896.56521544226	-1896.56521598854	3	211	20	230	2032	145709673	14707473	14854564	2051	146831812	15829612	15976703	1122139	-1.09254551716731e-06	1	15268542.5	146270742.5	15415633.5	cela1_red_5_14854564	cela1_red_5_15976703
LG3.b.221.20	Both	-2818.04735804167	-2818.04737008071	3	221	20	240	2042	146480132	15477932	15625023	2061	147306309	16304109	16451200	826177	-2.40780673266272e-05	1	15891020.5	146893220.5	16038111.5	cela1_red_5_15625023	cela1_red_5_16451200
LG3.b.221.20	Male	-884.66289954281	-884.170418751684	3	221	20	240	2042	146480132	15477932	15625023	2061	147306309	16304109	16451200	826177	0.984961582252026	0.320976933584379	15891020.5	146893220.5	16038111.5	cela1_red_5_15625023	cela1_red_5_16451200
LG3.b.221.20	Female	-1896.56272228763	-1896.5627289304	3	221	20	240	2042	146480132	15477932	15625023	2061	147306309	16304109	16451200	826177	-1.32855248011765e-05	1	15891020.5	146893220.5	16038111.5	cela1_red_5_15625023	cela1_red_5_16451200
LG3.b.231.20	Both	-2818.04312800712	-2818.043137579	3	231	20	250	2052	146864120	15861920	16009011	2071	147900752	16898552	17045643	1036632	-1.91437675312045e-05	1	16380236	147382436	16527327	cela1_red_5_16009011	cela1_red_5_17045643
LG3.b.231.20	Male	-884.66490821646	-883.921588394898	3	231	20	250	2052	146864120	15861920	16009011	2071	147900752	16898552	17045643	1036632	1.48663964312368	0.222738571010701	16380236	147382436	16527327	cela1_red_5_16009011	cela1_red_5_17045643
LG3.b.231.20	Female	-1896.55818682942	-1896.55819464099	3	231	20	250	2052	146864120	15861920	16009011	2071	147900752	16898552	17045643	1036632	-1.56231590153766e-05	1	16380236	147382436	16527327	cela1_red_5_16009011	cela1_red_5_17045643
LG3.b.241.20	Both	-2818.04545238011	-2818.0454612727	3	241	20	260	2062	147316306	16314106	16461197	2081	148417882	17415682	17562773	1101576	-1.77851907210425e-05	1	16864894	147867094	17011985	cela1_red_5_16461197	cela1_red_5_17562773
LG3.b.241.20	Male	-884.661905857169	-884.617522460088	3	241	20	260	2062	147316306	16314106	16461197	2081	148417882	17415682	17562773	1101576	0.088766794160847	0.765750814500345	16864894	147867094	17011985	cela1_red_5_16461197	cela1_red_5_17562773
LG3.b.241.20	Female	-1896.55745550563	-1896.55746498039	3	241	20	260	2062	147316306	16314106	16461197	2081	148417882	17415682	17562773	1101576	-1.89495226550207e-05	1	16864894	147867094	17011985	cela1_red_5_16461197	cela1_red_5_17562773
LG3.b.251.20	Both	-2818.04731517667	-2818.04732193898	3	251	20	270	2072	147946904	16944704	17091795	2091	149020643	18018443	18165534	1073739	-1.35246200443362e-05	1	17481573.5	148483773.5	17628664.5	cela1_red_5_17091795	cela1_red_5_18165534
LG3.b.251.20	Male	-884.661286574856	-884.645024626267	3	251	20	270	2072	147946904	16944704	17091795	2091	149020643	18018443	18165534	1073739	0.0325238971786348	0.856882648009224	17481573.5	148483773.5	17628664.5	cela1_red_5_17091795	cela1_red_5_18165534
LG3.b.251.20	Female	-1896.55977021699	-1896.55977679028	3	251	20	270	2072	147946904	16944704	17091795	2091	149020643	18018443	18165534	1073739	-1.31465872073022e-05	1	17481573.5	148483773.5	17628664.5	cela1_red_5_17091795	cela1_red_5_18165534
LG3.b.261.20	Both	-2818.05347637183	-2818.05347915386	3	261	20	280	2082	148463365	17461165	17608256	2101	149858460	18856260	19003351	1395095	-5.5640448408667e-06	1	18158712.5	149160912.5	18305803.5	cela1_red_5_17608256	cela1_red_5_19003351
LG3.b.261.20	Male	-884.663960124111	-883.964859472541	3	261	20	280	2082	148463365	17461165	17608256	2101	149858460	18856260	19003351	1395095	1.3982013031391	0.237024963369575	18158712.5	149160912.5	18305803.5	cela1_red_5_17608256	cela1_red_5_19003351
LG3.b.261.20	Female	-1896.56163337043	-1896.56163824538	3	261	20	280	2082	148463365	17461165	17608256	2101	149858460	18856260	19003351	1395095	-9.74989279711735e-06	1	18158712.5	149160912.5	18305803.5	cela1_red_5_17608256	cela1_red_5_19003351
LG3.b.271.20	Both	-2818.05073370341	-2818.05074088157	3	271	20	290	2092	149090122	18087922	18235013	2111	150768961	19766761	19913852	1678839	-1.43563183883089e-05	1	18927341.5	149929541.5	19074432.5	cela1_red_5_18235013	cela1_red_5_19913852
LG3.b.271.20	Male	-884.66281422819	-884.424743399067	3	271	20	290	2092	149090122	18087922	18235013	2111	150768961	19766761	19913852	1678839	0.476141658246888	0.490175204379534	18927341.5	149929541.5	19074432.5	cela1_red_5_18235013	cela1_red_5_19913852
LG3.b.271.20	Female	-1896.55985360602	-1896.55985885447	3	271	20	290	2092	149090122	18087922	18235013	2111	150768961	19766761	19913852	1678839	-1.04968976302189e-05	1	18927341.5	149929541.5	19074432.5	cela1_red_5_18235013	cela1_red_5_19913852
LG3.b.281.20	Both	-2818.04685061983	-2818.04685721457	3	281	20	300	2102	149904923	18902723	19049814	2121	151375397	20373197	20520288	1470474	-1.31894794321852e-05	1	19637960	150640160	19785051	cela1_red_5_19049814	cela1_red_5_20520288
LG3.b.281.20	Male	-884.661775051566	-884.635402303498	3	281	20	300	2102	149904923	18902723	19049814	2121	151375397	20373197	20520288	1470474	0.0527454961352305	0.81835296704035	19637960	150640160	19785051	cela1_red_5_19049814	cela1_red_5_20520288
LG3.b.281.20	Female	-1896.55978663281	-1896.55979266945	3	281	20	300	2102	149904923	18902723	19049814	2121	151375397	20373197	20520288	1470474	-1.20732815958036e-05	1	19637960	150640160	19785051	cela1_red_5_19049814	cela1_red_5_20520288
LG3.b.291.20	Both	-2818.04976498521	-2818.04977439012	3	291	20	310	2112	150801908	19799708	19946799	2131	151845642	20843442	20990533	1043734	-1.8809805624187e-05	1	20321575	151323775	20468666	cela1_red_5_19946799	cela1_red_5_20990533
LG3.b.291.20	Male	-884.660405765872	-884.660406906938	3	291	20	310	2112	150801908	19799708	19946799	2131	151845642	20843442	20990533	1043734	-2.28213207265071e-06	1	20321575	151323775	20468666	cela1_red_5_19946799	cela1_red_5_20990533
LG3.b.291.20	Female	-1896.5628285328	-1896.56283165472	3	291	20	310	2112	150801908	19799708	19946799	2131	151845642	20843442	20990533	1043734	-6.24385165792773e-06	1	20321575	151323775	20468666	cela1_red_5_19946799	cela1_red_5_20990533
LG3.b.301.20	Both	-2818.04804169588	-2818.04804757045	3	301	20	320	2122	151414708	20412508	20559599	2141	152580044	21577844	21724935	1165336	-1.17491235869238e-05	1	20995176	151997376	21142267	cela1_red_5_20559599	cela1_red_5_21724935
LG3.b.301.20	Male	-884.660936368361	-884.660938486532	3	301	20	320	2122	151414708	20412508	20559599	2141	152580044	21577844	21724935	1165336	-4.23634287471941e-06	1	20995176	151997376	21142267	cela1_red_5_20559599	cela1_red_5_21724935
LG3.b.301.20	Female	-1896.56284267413	-1896.56284622588	3	301	20	320	2122	151414708	20412508	20559599	2141	152580044	21577844	21724935	1165336	-7.10349786459119e-06	1	20995176	151997376	21142267	cela1_red_5_20559599	cela1_red_5_21724935
LG3.b.311.20	Both	-2818.04185242771	-2818.04186363308	3	311	20	330	2132	151886284	20884084	21031175	2151	153137660	22135460	22282551	1251376	-2.24107352551073e-05	1	21509772	152511972	21656863	cela1_red_5_21031175	cela1_red_5_22282551
LG3.b.311.20	Male	-884.660362482348	-884.660363879078	3	311	20	330	2132	151886284	20884084	21031175	2151	153137660	22135460	22282551	1251376	-2.79345931630814e-06	1	21509772	152511972	21656863	cela1_red_5_21031175	cela1_red_5_22282551
LG3.b.311.20	Female	-1896.55866339603	-1896.55867122603	3	311	20	330	2132	151886284	20884084	21031175	2151	153137660	22135460	22282551	1251376	-1.56599967340298e-05	1	21509772	152511972	21656863	cela1_red_5_21031175	cela1_red_5_22282551
LG3.b.321.20	Both	-2818.04832389025	-2818.04833008784	3	321	20	340	2142	152619782	21617582	21764673	2161	153512444	22510244	22657335	892662	-1.23951740533812e-05	1	22063913	153066113	22211004	cela1_red_5_21764673	cela1_red_5_22657335
LG3.b.321.20	Male	-884.658387947845	-884.658392603961	3	321	20	340	2142	152619782	21617582	21764673	2161	153512444	22510244	22657335	892662	-9.3122321231931e-06	1	22063913	153066113	22211004	cela1_red_5_21764673	cela1_red_5_22657335
LG3.b.321.20	Female	-1896.56406065115	-1896.56406320104	3	321	20	340	2142	152619782	21617582	21764673	2161	153512444	22510244	22657335	892662	-5.09977826368413e-06	1	22063913	153066113	22211004	cela1_red_5_21764673	cela1_red_5_22657335
LG3.b.331.20	Both	-2818.06008456521	-2817.98142596511	3	331	20	350	2152	153190182	22187982	22335073	2171	154231160	23228960	23376051	1040978	0.157317200199032	0.691638612744369	22708471	153710671	22855562	cela1_red_5_22335073	cela1_red_5_23376051
LG3.b.331.20	Male	-884.658850054425	-884.658853628012	3	331	20	350	2152	153190182	22187982	22335073	2171	154231160	23228960	23376051	1040978	-7.14717407390708e-06	1	22708471	153710671	22855562	cela1_red_5_22335073	cela1_red_5_23376051
LG3.b.331.20	Female	-1896.57364280272	-1896.20398028147	3	331	20	350	2152	153190182	22187982	22335073	2171	154231160	23228960	23376051	1040978	0.739325042491146	0.389877176877479	22708471	153710671	22855562	cela1_red_5_22335073	cela1_red_5_23376051
LG3.b.341.20	Both	-2818.05376519222	-2818.05376683403	3	341	20	360	2162	153579815	22577615	22724706	2181	154672851	23670651	23817742	1093036	-3.28361329593463e-06	1	23124133	154126333	23271224	cela1_red_5_22724706	cela1_red_5_23817742
LG3.b.341.20	Male	-884.659515843936	-884.659518738649	3	341	20	360	2162	153579815	22577615	22724706	2181	154672851	23670651	23817742	1093036	-5.78942695028672e-06	1	23124133	154126333	23271224	cela1_red_5_22724706	cela1_red_5_23817742
LG3.b.341.20	Female	-1896.56932499231	-1896.46065244442	3	341	20	360	2162	153579815	22577615	22724706	2181	154672851	23670651	23817742	1093036	0.217345095782093	0.641070310748962	23124133	154126333	23271224	cela1_red_5_22724706	cela1_red_5_23817742
LG3.b.351.20	Both	-2818.04426259024	-2818.04427223561	3	351	20	370	2172	154263862	23261662	23408753	2191	155242633	24240433	24387524	978771	-1.92907400560216e-05	1	23751047.5	154753247.5	23898138.5	cela1_red_5_23408753	cela1_red_5_24387524
LG3.b.351.20	Male	-884.659253454598	-884.659256759074	3	351	20	370	2172	154263862	23261662	23408753	2191	155242633	24240433	24387524	978771	-6.60895170767617e-06	1	23751047.5	154753247.5	23898138.5	cela1_red_5_23408753	cela1_red_5_24387524
LG3.b.351.20	Female	-1896.56056902412	-1896.56057517676	3	351	20	370	2172	154263862	23261662	23408753	2191	155242633	24240433	24387524	978771	-1.23052877825103e-05	1	23751047.5	154753247.5	23898138.5	cela1_red_5_23408753	cela1_red_5_24387524
LG3.b.361.20	Both	-2818.04401183817	-2818.04402210107	3	361	20	380	2182	154673169	23670969	23818060	2201	155731245	24729045	24876136	1058076	-2.05258083951776e-05	1	24200007	155202207	24347098	cela1_red_5_23818060	cela1_red_5_24876136
LG3.b.361.20	Male	-884.658904911414	-884.658908945265	3	361	20	380	2182	154673169	23670969	23818060	2201	155731245	24729045	24876136	1058076	-8.06770117378619e-06	1	24200007	155202207	24347098	cela1_red_5_23818060	cela1_red_5_24876136
LG3.b.361.20	Female	-1896.5587100568	-1896.55871847034	3	361	20	380	2182	154673169	23670969	23818060	2201	155731245	24729045	24876136	1058076	-1.68270717040286e-05	1	24200007	155202207	24347098	cela1_red_5_23818060	cela1_red_5_24876136
LG3.b.371.20	Both	-2818.04620901029	-2818.0462169848	3	371	20	390	2192	155310335	24308135	24455226	2211	156370991	25368791	25515882	1060656	-1.59490164151066e-05	1	24838463	155840663	24985554	cela1_red_5_24455226	cela1_red_5_25515882
LG3.b.371.20	Male	-884.662293581459	-884.58612792148	3	371	20	390	2192	155310335	24308135	24455226	2211	156370991	25368791	25515882	1060656	0.152331319957511	0.696317347040831	24838463	155840663	24985554	cela1_red_5_24455226	cela1_red_5_25515882
LG3.b.371.20	Female	-1896.56133687612	-1896.56134225279	3	371	20	390	2192	155310335	24308135	24455226	2211	156370991	25368791	25515882	1060656	-1.07533373920887e-05	1	24838463	155840663	24985554	cela1_red_5_24455226	cela1_red_5_25515882
LG3.b.381.20	Both	-2818.0472627904	-2818.04726951528	3	381	20	400	2202	155799017	24796817	24943908	2221	156969484	25967284	26114375	1170467	-1.34497577164439e-05	1	25382050.5	156384250.5	25529141.5	cela1_red_5_24943908	cela1_red_5_26114375
LG3.b.381.20	Male	-884.664204109182	-884.356166299784	3	381	20	400	2202	155799017	24796817	24943908	2221	156969484	25967284	26114375	1170467	0.616075618796003	0.432509360006441	25382050.5	156384250.5	25529141.5	cela1_red_5_24943908	cela1_red_5_26114375
LG3.b.381.20	Female	-1896.56322396378	-1896.56322732366	3	381	20	400	2202	155799017	24796817	24943908	2221	156969484	25967284	26114375	1170467	-6.71975612931419e-06	1	25382050.5	156384250.5	25529141.5	cela1_red_5_24943908	cela1_red_5_26114375
LG3.b.391.20	Both	-2818.04962354515	-2818.04962856795	3	391	20	410	2212	156426868	25424668	25571759	2231	157830113	26827913	26975004	1403245	-1.0045609997178e-05	1	26126290.5	157128490.5	26273381.5	cela1_red_5_25571759	cela1_red_5_26975004
LG3.b.391.20	Male	-884.661660088917	-884.646101339575	3	391	20	410	2212	156426868	25424668	25571759	2231	157830113	26827913	26975004	1403245	0.031117498683443	0.859978505203104	26126290.5	157128490.5	26273381.5	cela1_red_5_25571759	cela1_red_5_26975004
LG3.b.391.20	Female	-1896.56288069423	-1896.56288433795	3	391	20	410	2212	156426868	25424668	25571759	2231	157830113	26827913	26975004	1403245	-7.28742998035159e-06	1	26126290.5	157128490.5	26273381.5	cela1_red_5_25571759	cela1_red_5_26975004
LG3.b.401.20	Both	-2818.04894299894	-2818.04894942482	3	401	20	420	2222	157142921	26140721	26287812	2241	158477631	27475431	27622522	1334710	-1.28517767734593e-05	1	26808076	157810276	26955167	cela1_red_5_26287812	cela1_red_5_27622522
LG3.b.401.20	Male	-884.65984355764	-884.659846088859	3	401	20	420	2222	157142921	26140721	26287812	2241	158477631	27475431	27622522	1334710	-5.06243645759241e-06	1	26808076	157810276	26955167	cela1_red_5_26287812	cela1_red_5_27622522
LG3.b.401.20	Female	-1896.56029887516	-1896.56030604046	3	401	20	420	2222	157142921	26140721	26287812	2241	158477631	27475431	27622522	1334710	-1.4330604699353e-05	1	26808076	157810276	26955167	cela1_red_5_26287812	cela1_red_5_27622522
LG3.b.411.20	Both	-2818.043820515	-2818.0438318363	3	411	20	430	2232	157925801	26923601	27070692	2251	159034305	28032105	28179196	1108504	-2.26426082008402e-05	1	27477853	158480053	27624944	cela1_red_5_27070692	cela1_red_5_28179196
LG3.b.411.20	Male	-884.661176476108	-884.661176551523	3	411	20	430	2232	157925801	26923601	27070692	2251	159034305	28032105	28179196	1108504	-1.50829464473645e-07	1	27477853	158480053	27624944	cela1_red_5_27070692	cela1_red_5_28179196
LG3.b.411.20	Female	-1896.55901015036	-1896.55901891585	3	411	20	430	2232	157925801	26923601	27070692	2251	159034305	28032105	28179196	1108504	-1.75309955920966e-05	1	27477853	158480053	27624944	cela1_red_5_27070692	cela1_red_5_28179196
LG3.b.421.20	Both	-2818.04043132673	-2818.04044465793	3	421	20	440	2242	158550610	27548410	27695501	2261	160036114	29033914	29181005	1485504	-2.66623856077786e-05	1	28291162	159293362	28438253	cela1_red_5_27695501	cela1_red_5_29181005
LG3.b.421.20	Male	-884.661169778384	-884.661170096995	3	421	20	440	2242	158550610	27548410	27695501	2261	160036114	29033914	29181005	1485504	-6.37222683508298e-07	1	28291162	159293362	28438253	cela1_red_5_27695501	cela1_red_5_29181005
LG3.b.421.20	Female	-1896.55913797906	-1896.55914587762	3	421	20	440	2242	158550610	27548410	27695501	2261	160036114	29033914	29181005	1485504	-1.57971107910271e-05	1	28291162	159293362	28438253	cela1_red_5_27695501	cela1_red_5_29181005
LG3.b.431.20	Both	-2818.03865144625	-2818.03866593611	3	431	20	450	2252	159072143	28069943	28217034	2271	160435995	29433795	29580886	1363852	-2.89797135337722e-05	1	28751869	159754069	28898960	cela1_red_5_28217034	cela1_red_5_29580886
LG3.b.431.20	Male	-884.65980518111	-884.659807582027	3	431	20	450	2252	159072143	28069943	28217034	2271	160435995	29433795	29580886	1363852	-4.80183325635153e-06	1	28751869	159754069	28898960	cela1_red_5_28217034	cela1_red_5_29580886
LG3.b.431.20	Female	-1896.55724468953	-1896.5572543552	3	431	20	450	2252	159072143	28069943	28217034	2271	160435995	29433795	29580886	1363852	-1.93313221643621e-05	1	28751869	159754069	28898960	cela1_red_5_28217034	cela1_red_5_29580886
LG3.b.441.20	Both	-2818.03942382833	-2818.03943697029	3	441	20	460	2262	160039946	29037746	29184837	2281	160909711	29907511	30054602	869765	-2.62839103015722e-05	1	29472628.5	160474828.5	29619719.5	cela1_red_5_29184837	cela1_red_5_30054602
LG3.b.441.20	Male	-884.660846045711	-884.660846635874	3	441	20	460	2262	160039946	29037746	29184837	2281	160909711	29907511	30054602	869765	-1.18032539830892e-06	1	29472628.5	160474828.5	29619719.5	cela1_red_5_29184837	cela1_red_5_30054602
LG3.b.441.20	Female	-1896.55710079924	-1896.55711015567	3	441	20	460	2262	160039946	29037746	29184837	2281	160909711	29907511	30054602	869765	-1.87128466677677e-05	1	29472628.5	160474828.5	29619719.5	cela1_red_5_29184837	cela1_red_5_30054602
LG3.b.451.20	Both	-2818.0401766454	-2818.04018879527	3	451	20	470	2272	160475245	29473045	29620136	2291	161476187	30473987	30621078	1000942	-2.42997357418062e-05	1	29973516	160975716	30120607	cela1_red_5_29620136	cela1_red_5_30621078
LG3.b.451.20	Male	-884.661545893272	-884.650032471383	3	451	20	470	2272	160475245	29473045	29620136	2291	161476187	30473987	30621078	1000942	0.0230268437794621	0.879387286816357	29973516	160975716	30120607	cela1_red_5_29620136	cela1_red_5_30621078
LG3.b.451.20	Female	-1896.55682152006	-1896.55683083099	3	451	20	470	2272	160475245	29473045	29620136	2291	161476187	30473987	30621078	1000942	-1.86218599083077e-05	1	29973516	160975716	30120607	cela1_red_5_29620136	cela1_red_5_30621078
LG3.b.461.20	Both	-2818.03984961199	-2818.03986339754	3	461	20	480	2282	161098829	30096629	30243720	2301	161987547	30985347	31132438	888718	-2.75710926871398e-05	1	30540988	161543188	30688079	cela1_red_5_30243720	cela1_red_5_31132438
LG3.b.461.20	Male	-884.661158609968	-884.661158713876	3	461	20	480	2282	161098829	30096629	30243720	2301	161987547	30985347	31132438	888718	-2.07816810871009e-07	1	30540988	161543188	30688079	cela1_red_5_30243720	cela1_red_5_31132438
LG3.b.461.20	Female	-1896.55584404187	-1896.55585543085	3	461	20	480	2282	161098829	30096629	30243720	2301	161987547	30985347	31132438	888718	-2.27779637498315e-05	1	30540988	161543188	30688079	cela1_red_5_30243720	cela1_red_5_31132438
LG3.b.471.20	Both	-2818.03971068489	-2818.0397230264	3	471	20	490	2292	161489927	30487727	30634818	2311	162888676	31886476	32033567	1398749	-2.46830231844797e-05	1	31187101.5	162189301.5	31334192.5	cela1_red_5_30634818	cela1_red_5_32033567
LG3.b.471.20	Male	-884.660990876919	-884.660991210708	3	471	20	490	2292	161489927	30487727	30634818	2311	162888676	31886476	32033567	1398749	-6.67577523927321e-07	1	31187101.5	162189301.5	31334192.5	cela1_red_5_30634818	cela1_red_5_32033567
LG3.b.471.20	Female	-1896.55536480158	-1896.55537537985	3	471	20	490	2292	161489927	30487727	30634818	2311	162888676	31886476	32033567	1398749	-2.1156547973078e-05	1	31187101.5	162189301.5	31334192.5	cela1_red_5_30634818	cela1_red_5_32033567
LG3.b.481.20	Both	-2818.04437040169	-2818.04437746923	3	481	20	500	2302	162075712	31073512	31220603	2321	163447149	32444949	32592040	1371437	-1.41350692501874e-05	1	31759230.5	162761430.5	31906321.5	cela1_red_5_31220603	cela1_red_5_32592040
LG3.b.481.20	Male	-884.661533649854	-884.606038935053	3	481	20	500	2302	162075712	31073512	31220603	2321	163447149	32444949	32592040	1371437	0.110989429602796	0.739020483974508	31759230.5	162761430.5	31906321.5	cela1_red_5_31220603	cela1_red_5_32592040
LG3.b.481.20	Female	-1896.55663257857	-1896.55664023859	3	481	20	500	2302	162075712	31073512	31220603	2321	163447149	32444949	32592040	1371437	-1.53200448949065e-05	1	31759230.5	162761430.5	31906321.5	cela1_red_5_31220603	cela1_red_5_32592040
LG3.b.491.20	Both	-2818.04479716391	-2818.04480428996	3	491	20	510	2312	162965282	31963082	32110173	2331	164259729	33257529	33404620	1294447	-1.42521048474009e-05	1	32610305.5	163612505.5	32757396.5	cela1_red_5_32110173	cela1_red_5_33404620
LG3.b.491.20	Male	-884.66148308668	-884.606375689567	3	491	20	510	2312	162965282	31963082	32110173	2331	164259729	33257529	33404620	1294447	0.110214794226522	0.739899728062102	32610305.5	163612505.5	32757396.5	cela1_red_5_32110173	cela1_red_5_33404620
LG3.b.491.20	Female	-1896.55877241592	-1896.55877879473	3	491	20	510	2312	162965282	31963082	32110173	2331	164259729	33257529	33404620	1294447	-1.27576058730483e-05	1	32610305.5	163612505.5	32757396.5	cela1_red_5_32110173	cela1_red_5_33404620
LG3.b.501.20	Both	-2818.0471110826	-2818.04711901207	3	501	20	520	2322	163526268	32524068	32671159	2341	164813733	33811533	33958624	1287465	-1.58589364218642e-05	1	33167800.5	164170000.5	33314891.5	cela1_red_5_32671159	cela1_red_5_33958624
LG3.b.501.20	Male	-884.661519392846	-884.648875506812	3	501	20	520	2322	163526268	32524068	32671159	2341	164813733	33811533	33958624	1287465	0.0252877720688502	0.873652096812481	33167800.5	164170000.5	33314891.5	cela1_red_5_32671159	cela1_red_5_33958624
LG3.b.501.20	Female	-1896.55937875656	-1896.55938685594	3	501	20	520	2322	163526268	32524068	32671159	2341	164813733	33811533	33958624	1287465	-1.61987668434449e-05	1	33167800.5	164170000.5	33314891.5	cela1_red_5_32671159	cela1_red_5_33958624
LG3.b.511.20	Both	-2818.05904045759	-2818.01104320761	3	511	20	530	2332	164324129	33321929	33469020	2351	165318967	34316767	34463858	994838	0.0959944999576692	0.756690394970125	33819348	164821548	33966439	cela1_red_5_33469020	cela1_red_5_34463858
LG3.b.511.20	Male	-884.661017516418	-884.661019279572	3	511	20	530	2332	164324129	33321929	33469020	2351	165318967	34316767	34463858	994838	-3.52630740962923e-06	1	33819348	164821548	33966439	cela1_red_5_33469020	cela1_red_5_34463858
LG3.b.511.20	Female	-1896.56741832968	-1896.55828246523	3	511	20	530	2332	164324129	33321929	33469020	2351	165318967	34316767	34463858	994838	0.0182717288980712	0.892475126281623	33819348	164821548	33966439	cela1_red_5_33469020	cela1_red_5_34463858
LG3.b.521.20	Both	-2818.05533734939	-2818.05533862899	3	521	20	540	2342	164885191	33882991	34030082	2361	165772748	34770548	34917639	887557	-2.55919167102547e-06	1	34326769.5	165328969.5	34473860.5	cela1_red_5_34030082	cela1_red_5_34917639
LG3.b.521.20	Male	-884.660686310744	-884.660687037673	3	521	20	540	2342	164885191	33882991	34030082	2361	165772748	34770548	34917639	887557	-1.45385774885654e-06	1	34326769.5	165328969.5	34473860.5	cela1_red_5_34030082	cela1_red_5_34917639
LG3.b.521.20	Female	-1896.568392855	-1896.54908601958	3	521	20	540	2342	164885191	33882991	34030082	2361	165772748	34770548	34917639	887557	0.0386136708380036	0.844216003207377	34326769.5	165328969.5	34473860.5	cela1_red_5_34030082	cela1_red_5_34917639
LG3.b.531.20	Both	-2818.05590824545	-2818.05590656604	3	531	20	550	2352	165336100	34333900	34480991	2371	166408370	35406170	35553261	1072270	3.35883760271827e-06	0.998537707267339	34870035	165872235	35017126	cela1_red_5_34480991	cela1_red_5_35553261
LG3.b.531.20	Male	-884.661324250584	-884.658421938812	3	531	20	550	2352	165336100	34333900	34480991	2371	166408370	35406170	35553261	1072270	0.00580462354378142	0.939269465856749	34870035	165872235	35017126	cela1_red_5_34480991	cela1_red_5_35553261
LG3.b.531.20	Female	-1896.567269251	-1896.5653372115	3	531	20	550	2352	165336100	34333900	34480991	2371	166408370	35406170	35553261	1072270	0.00386407901441999	0.950434049206448	34870035	165872235	35017126	cela1_red_5_34480991	cela1_red_5_35553261
LG3.b.541.20	Both	-2818.05356551006	-2818.05356737822	3	541	20	560	2362	165829051	34826851	34973942	2381	167106214	36104014	36251105	1277163	-3.73631519323681e-06	1	35465432.5	166467632.5	35612523.5	cela1_red_5_34973942	cela1_sika_5_36251105
LG3.b.541.20	Male	-884.662213440351	-884.542918446569	3	541	20	560	2362	165829051	34826851	34973942	2381	167106214	36104014	36251105	1277163	0.238589987562591	0.625226359849715	35465432.5	166467632.5	35612523.5	cela1_red_5_34973942	cela1_sika_5_36251105
LG3.b.541.20	Female	-1896.56734857359	-1896.56256420568	3	541	20	560	2362	165829051	34826851	34973942	2381	167106214	36104014	36251105	1277163	0.00956873582481421	0.922075293119783	35465432.5	166467632.5	35612523.5	cela1_red_5_34973942	cela1_sika_5_36251105
LG3.b.551.20	Both	-2818.0473401022	-2818.04736393278	3	551	20	570	2372	166608397	35606197	35753288	2391	167723897	36721697	36868788	1115500	-4.76611539852456e-05	1	36163947	167166147	36311038	cela1_red_5_35753288	cela1_red_5_36868788
LG3.b.551.20	Male	-884.664589706487	-883.757078633364	3	551	20	570	2372	166608397	35606197	35753288	2391	167723897	36721697	36868788	1115500	1.81502214624493	0.177906948645539	36163947	167166147	36311038	cela1_red_5_35753288	cela1_red_5_36868788
LG3.b.551.20	Female	-1896.56303836265	-1896.56305198375	3	551	20	570	2372	166608397	35606197	35753288	2391	167723897	36721697	36868788	1115500	-2.7242203032074e-05	1	36163947	167166147	36311038	cela1_red_5_35753288	cela1_red_5_36868788
LG3.b.561.20	Both	-2818.04890345372	-2818.04891733331	3	561	20	580	2382	167133098	36130898	36277989	2401	168347941	37345741	37492832	1214843	-2.77591798294452e-05	1	36738319.5	167740519.5	36885410.5	cela1_red_5_36277989	cela1_red_5_37492832
LG3.b.561.20	Male	-884.667987521754	-882.251788740016	3	561	20	580	2382	167133098	36130898	36277989	2401	168347941	37345741	37492832	1214843	4.83239756347621	0.0279297644949944	36738319.5	167740519.5	36885410.5	cela1_red_5_36277989	cela1_red_5_37492832
LG3.b.561.20	Female	-1896.56383430587	-1896.56384755342	3	561	20	580	2382	167133098	36130898	36277989	2401	168347941	37345741	37492832	1214843	-2.64950904238503e-05	1	36738319.5	167740519.5	36885410.5	cela1_red_5_36277989	cela1_red_5_37492832
LG3.b.571.20	Both	-2818.04526969068	-2818.04527760314	3	571	20	590	2392	167732710	36730510	36877601	2411	169047024	38044824	38191915	1314314	-1.58249386004172e-05	1	37387667	168389867	37534758	cela1_red_5_36877601	cela1_red_5_38191915
LG3.b.571.20	Male	-884.666093626633	-882.688071469241	3	571	20	590	2392	167732710	36730510	36877601	2411	169047024	38044824	38191915	1314314	3.9560443147825	0.0467033307949676	37387667	168389867	37534758	cela1_red_5_36877601	cela1_red_5_38191915
LG3.b.571.20	Female	-1896.56175001769	-1896.5617545069	3	571	20	590	2392	167732710	36730510	36877601	2411	169047024	38044824	38191915	1314314	-8.97842255653813e-06	1	37387667	168389867	37534758	cela1_red_5_36877601	cela1_red_5_38191915
LG3.b.581.20	Both	-2818.04954862473	-2818.04955362354	3	581	20	600	2402	168386301	37384101	37531192	2421	169648291	38646091	38793182	1261990	-9.99762323772302e-06	1	38015096	169017296	38162187	cela1_red_5_37531192	cela1_red_5_38793182
LG3.b.581.20	Male	-884.66234950457	-884.312770383075	3	581	20	600	2402	168386301	37384101	37531192	2421	169648291	38646091	38793182	1261990	0.699158242990279	0.403066681414861	38015096	169017296	38162187	cela1_red_5_37531192	cela1_red_5_38793182
LG3.b.581.20	Female	-1896.56306491567	-1896.56306838678	3	581	20	600	2402	168386301	37384101	37531192	2421	169648291	38646091	38793182	1261990	-6.94222671882017e-06	1	38015096	169017296	38162187	cela1_red_5_37531192	cela1_red_5_38793182
LG3.b.591.20	Both	-2818.05128355289	-2818.05128732472	3	591	20	610	2412	169163475	38161275	38308366	2431	170133206	39131006	39278097	969731	-7.5436719271238e-06	1	38646140.5	169648340.5	38793231.5	cela1_red_5_38308366	cela1_red_5_39278097
LG3.b.591.20	Male	-884.663068216503	-884.238546883826	3	591	20	610	2412	169163475	38161275	38308366	2431	170133206	39131006	39278097	969731	0.849042665355228	0.356823304212964	38646140.5	169648340.5	38793231.5	cela1_red_5_38308366	cela1_red_5_39278097
LG3.b.591.20	Female	-1896.56392776347	-1896.56393044985	3	591	20	610	2412	169163475	38161275	38308366	2431	170133206	39131006	39278097	969731	-5.37276855538948e-06	1	38646140.5	169648340.5	38793231.5	cela1_red_5_38308366	cela1_red_5_39278097
LG3.b.601.20	Both	-2818.04554231982	-2818.04555123562	3	601	20	620	2422	169700171	38697971	38845062	2441	170823614	39821414	39968505	1123443	-1.78315995071898e-05	1	39259692.5	170261892.5	39406783.5	cela1_red_5_38845062	cela1_red_5_39968505
LG3.b.601.20	Male	-884.664039916179	-884.022622546173	3	601	20	620	2422	169700171	38697971	38845062	2441	170823614	39821414	39968505	1123443	1.28283474001137	0.257372627985088	39259692.5	170261892.5	39406783.5	cela1_red_5_38845062	cela1_red_5_39968505
LG3.b.601.20	Female	-1896.5605938714	-1896.56060022987	3	601	20	620	2422	169700171	38697971	38845062	2441	170823614	39821414	39968505	1123443	-1.27169355437218e-05	1	39259692.5	170261892.5	39406783.5	cela1_red_5_38845062	cela1_red_5_39968505
LG3.b.611.20	Both	-2818.04843565692	-2818.04844225314	3	611	20	630	2432	170292633	39290433	39437524	2451	171364576	40362376	40509467	1071943	-1.31924316519871e-05	1	39826404.5	170828604.5	39973495.5	cela1_red_5_39437524	cela1_red_5_40509467
LG3.b.611.20	Male	-884.662402085792	-884.535204902116	3	611	20	630	2432	170292633	39290433	39437524	2451	171364576	40362376	40509467	1071943	0.254394367351779	0.613997724660574	39826404.5	170828604.5	39973495.5	cela1_red_5_39437524	cela1_red_5_40509467
LG3.b.611.20	Female	-1896.56223451346	-1896.56223933441	3	611	20	630	2432	170292633	39290433	39437524	2451	171364576	40362376	40509467	1071943	-9.64188757279771e-06	1	39826404.5	170828604.5	39973495.5	cela1_red_5_39437524	cela1_red_5_40509467
LG3.b.621.20	Both	-2818.06651935353	-2817.60986081493	3	621	20	640	2442	170905683	39903483	40050574	2461	171898480	40896280	41043371	992797	0.913317077199281	0.339235829751007	40399881.5	171402081.5	40546972.5	cela1_red_5_40050574	cela1_red_5_41043371
LG3.b.621.20	Male	-884.662217888821	-884.430155109119	3	621	20	640	2442	170905683	39903483	40050574	2461	171898480	40896280	41043371	992797	0.464125559405602	0.495702172896432	40399881.5	171402081.5	40546972.5	cela1_red_5_40050574	cela1_red_5_41043371
LG3.b.621.20	Female	-1896.57132981396	-1896.3492821237	3	621	20	640	2442	170905683	39903483	40050574	2461	171898480	40896280	41043371	992797	0.444095380526051	0.505152384208038	40399881.5	171402081.5	40546972.5	cela1_red_5_40050574	cela1_red_5_41043371
LG3.b.631.20	Both	-2818.06616149603	-2817.70595960893	3	631	20	650	2452	171405732	40403532	40550623	2471	172391283	41389083	41536174	985551	0.720403774203987	0.396011495835879	40896307.5	171898507.5	41043398.5	cela1_red_5_40550623	cela1_red_5_41536174
LG3.b.631.20	Male	-884.662530157142	-884.459568195224	3	631	20	650	2452	171405732	40403532	40550623	2471	172391283	41389083	41536174	985551	0.405923923837008	0.524045644726825	40896307.5	171898507.5	41043398.5	cela1_red_5_40550623	cela1_red_5_41536174
LG3.b.631.20	Female	-1896.57048727237	-1896.41672246773	3	631	20	650	2452	171405732	40403532	40550623	2471	172391283	41389083	41536174	985551	0.307529609283847	0.579200086922832	40896307.5	171898507.5	41043398.5	cela1_red_5_40550623	cela1_red_5_41536174
LG3.b.641.20	Both	-2818.06518567497	-2817.75037832719	3	641	20	660	2462	171929907	40927707	41074798	2481	172971770	41969570	42116661	1041863	0.629614695551936	0.42749668130962	41448638.5	172450838.5	41595729.5	cela1_red_5_41074798	cela1_red_5_42116661
LG3.b.641.20	Male	-884.661195915666	-884.661195991772	3	641	20	660	2462	171929907	40927707	41074798	2481	172971770	41969570	42116661	1041863	-1.52211669046665e-07	1	41448638.5	172450838.5	41595729.5	cela1_red_5_41074798	cela1_red_5_42116661
LG3.b.641.20	Female	-1896.57128295366	-1896.4048854035	3	641	20	660	2462	171929907	40927707	41074798	2481	172971770	41969570	42116661	1041863	0.332795100319345	0.564017848541482	41448638.5	172450838.5	41595729.5	cela1_red_5_41074798	cela1_red_5_42116661
LG3.b.651.20	Both	-2818.06410133375	-2817.92015690799	3	651	20	670	2472	172451098	41448898	41595989	2491	173947874	42945674	43092765	1496776	0.287888851532443	0.591576590822838	42197286	173199486	42344377	cela1_sika_5_41595989	cela1_red_5_43092765
LG3.b.651.20	Male	-884.661938169646	-884.620499040524	3	651	20	670	2472	172451098	41448898	41595989	2491	173947874	42945674	43092765	1496776	0.0828782582429994	0.773434124502811	42197286	173199486	42344377	cela1_sika_5_41595989	cela1_red_5_43092765
LG3.b.651.20	Female	-1896.57229648873	-1896.41494029386	3	651	20	670	2472	172451098	41448898	41595989	2491	173947874	42945674	43092765	1496776	0.314712389752003	0.574802768681337	42197286	173199486	42344377	cela1_sika_5_41595989	cela1_red_5_43092765
LG3.b.661.20	Both	-2818.04745633438	-2818.0474636449	3	661	20	680	2482	172973614	41971414	42118505	2501	174471308	43469108	43616199	1497694	-1.46210422826698e-05	1	42720261	173722461	42867352	cela1_red_5_42118505	cela1_red_5_43616199
LG3.b.661.20	Male	-884.662345144313	-884.578706112119	3	661	20	680	2482	172973614	41971414	42118505	2501	174471308	43469108	43616199	1497694	0.167278064388483	0.682542294827962	42720261	173722461	42867352	cela1_red_5_42118505	cela1_red_5_43616199
LG3.b.661.20	Female	-1896.564068788	-1896.56407168173	3	661	20	680	2482	172973614	41971414	42118505	2501	174471308	43469108	43616199	1497694	-5.7874522099155e-06	1	42720261	173722461	42867352	cela1_red_5_42118505	cela1_red_5_43616199
LG3.b.671.20	Both	-2818.04900636519	-2818.04901205016	3	671	20	690	2492	173977721	42975521	43122612	2511	175030197	44027997	44175088	1052476	-1.13699261419242e-05	1	43501759	174503959	43648850	cela1_red_5_43122612	cela1_red_5_44175088
LG3.b.671.20	Male	-884.660661153305	-884.660662076019	3	671	20	690	2492	173977721	42975521	43122612	2511	175030197	44027997	44175088	1052476	-1.84542977876845e-06	1	43501759	174503959	43648850	cela1_red_5_43122612	cela1_red_5_44175088
LG3.b.671.20	Female	-1896.56772263183	-1896.55995893822	3	671	20	690	2492	173977721	42975521	43122612	2511	175030197	44027997	44175088	1052476	0.0155273872051112	0.900833152766776	43501759	174503959	43648850	cela1_red_5_43122612	cela1_red_5_44175088
LG3.b.681.20	Both	-2818.05024956005	-2818.05025374045	3	681	20	700	2502	174529303	43527103	43674194	2521	175962781	44960581	45107672	1433478	-8.36079198052175e-06	1	44243842	175246042	44390933	cela1_red_5_43674194	cela1_red_5_45107672
LG3.b.681.20	Male	-884.66135800044	-884.65891883357	3	681	20	700	2502	174529303	43527103	43674194	2521	175962781	44960581	45107672	1433478	0.00487833374154434	0.944316974424928	44243842	175246042	44390933	cela1_red_5_43674194	cela1_red_5_45107672
LG3.b.681.20	Female	-1896.56628211619	-1896.56628257567	3	681	20	700	2502	174529303	43527103	43674194	2521	175962781	44960581	45107672	1433478	-9.18964815355139e-07	1	44243842	175246042	44390933	cela1_red_5_43674194	cela1_red_5_45107672
LG3.b.691.20	Both	-2818.04873865883	-2818.04874390058	3	691	20	710	2512	175086881	44084681	44231772	2531	176591332	45589132	45736223	1504451	-1.04834934973042e-05	1	44836906.5	175839106.5	44983997.5	cela1_red_5_44231772	cela1_red_5_45736223
LG3.b.691.20	Male	-884.662505098691	-884.585171547098	3	691	20	710	2512	175086881	44084681	44231772	2531	176591332	45589132	45736223	1504451	0.154667103186966	0.694114617958034	44836906.5	175839106.5	44983997.5	cela1_red_5_44231772	cela1_red_5_45736223
LG3.b.691.20	Female	-1896.56288976383	-1896.56289305849	3	691	20	710	2512	175086881	44084681	44231772	2531	176591332	45589132	45736223	1504451	-6.58932276564883e-06	1	44836906.5	175839106.5	44983997.5	cela1_red_5_44231772	cela1_red_5_45736223
LG3.b.701.20	Both	-2818.04926847078	-2818.04927424148	3	701	20	720	2522	176018714	45016514	45163605	2541	176996915	45994715	46141806	978201	-1.15414013635018e-05	1	45505614.5	176507814.5	45652705.5	cela1_red_5_45163605	cela1_red_5_46141806
LG3.b.701.20	Male	-884.66107671844	-884.661077048816	3	701	20	720	2522	176018714	45016514	45163605	2541	176996915	45994715	46141806	978201	-6.60751084069489e-07	1	45505614.5	176507814.5	45652705.5	cela1_red_5_45163605	cela1_red_5_46141806
LG3.b.701.20	Female	-1896.56323560814	-1896.56323912974	3	701	20	720	2522	176018714	45016514	45163605	2541	176996915	45994715	46141806	978201	-7.04321109878947e-06	1	45505614.5	176507814.5	45652705.5	cela1_red_5_45163605	cela1_red_5_46141806
LG3.b.711.20	Both	-2818.04330073036	-2818.04331150528	3	711	20	730	2532	176617115	45614915	45762006	2551	177664344	46662144	46809235	1047229	-2.15498375837342e-05	1	46138529.5	177140729.5	46285620.5	cela1_red_5_45762006	cela1_red_5_46809235
LG3.b.711.20	Male	-884.660600103638	-884.660601251321	3	711	20	730	2532	176617115	45614915	45762006	2551	177664344	46662144	46809235	1047229	-2.29536749429826e-06	1	46138529.5	177140729.5	46285620.5	cela1_red_5_45762006	cela1_red_5_46809235
LG3.b.711.20	Female	-1896.5589948871	-1896.55900289623	3	711	20	730	2532	176617115	45614915	45762006	2551	177664344	46662144	46809235	1047229	-1.60182703439204e-05	1	46138529.5	177140729.5	46285620.5	cela1_red_5_45762006	cela1_red_5_46809235
LG3.b.721.20	Both	-2818.04715690278	-2818.04716366248	3	721	20	740	2542	177096286	46094086	46241177	2561	178301932	47299732	47446823	1205646	-1.35193986352533e-05	1	46696909	177699109	46844000	cela1_red_5_46241177	cela1_red_5_47446823
LG3.b.721.20	Male	-884.660786056041	-884.660786784288	3	721	20	740	2542	177096286	46094086	46241177	2561	178301932	47299732	47446823	1205646	-1.45649437399697e-06	1	46696909	177699109	46844000	cela1_red_5_46241177	cela1_red_5_47446823
LG3.b.721.20	Female	-1896.5611079624	-1896.56111319858	3	721	20	740	2542	177096286	46094086	46241177	2561	178301932	47299732	47446823	1205646	-1.0472374924575e-05	1	46696909	177699109	46844000	cela1_red_5_46241177	cela1_red_5_47446823
LG3.b.731.20	Both	-2818.04791510013	-2818.04792085757	3	731	20	750	2552	177700982	46698782	46845873	2571	179393610	48391410	48538501	1692628	-1.15148823169875e-05	1	47545096	178547296	47692187	cela1_red_5_46845873	cela1_red_5_48538501
LG3.b.731.20	Male	-884.661518452001	-884.652776703902	3	731	20	750	2552	177700982	46698782	46845873	2571	179393610	48391410	48538501	1692628	0.0174834961987926	0.894806191281151	47545096	178547296	47692187	cela1_red_5_46845873	cela1_red_5_48538501
LG3.b.731.20	Female	-1896.56108823821	-1896.5610931107	3	731	20	750	2552	177700982	46698782	46845873	2571	179393610	48391410	48538501	1692628	-9.74496970229666e-06	1	47545096	178547296	47692187	cela1_red_5_46845873	cela1_red_5_48538501
LG3.b.741.20	Both	-2818.0604104393	-2817.98175710503	3	741	20	760	2562	178302528	47300328	47447419	2581	179829073	48826873	48973964	1526545	0.157306668543242	0.691648404623277	48063600.5	179065800.5	48210691.5	cela1_red_5_47447419	cela1_red_5_48973964
LG3.b.741.20	Male	-884.661542788871	-884.649945449273	3	741	20	760	2562	178302528	47300328	47447419	2581	179829073	48826873	48973964	1526545	0.0231946791959672	0.878951906452908	48063600.5	179065800.5	48210691.5	cela1_red_5_47447419	cela1_red_5_48973964
LG3.b.741.20	Female	-1896.56786592522	-1896.55259757931	3	741	20	760	2562	178302528	47300328	47447419	2581	179829073	48826873	48973964	1526545	0.0305366918200889	0.861278035482228	48063600.5	179065800.5	48210691.5	cela1_red_5_47447419	cela1_red_5_48973964
LG3.b.751.20	Both	-2818.06800939942	-2817.69926255136	3	751	20	770	2572	179435033	48432833	48579924	2591	180359475	49357275	49504366	924442	0.737493696115962	0.390464921334775	48895054	179897254	49042145	cela1_red_5_48579924	cela1_red_5_49504366
LG3.b.751.20	Male	-884.661223343133	-884.661223361886	3	751	20	770	2572	179435033	48432833	48579924	2591	180359475	49357275	49504366	924442	-3.7505742511712e-08	1	48895054	179897254	49042145	cela1_red_5_48579924	cela1_red_5_49504366
LG3.b.751.20	Female	-1896.57502032729	-1896.0499138427	3	751	20	770	2572	179435033	48432833	48579924	2591	180359475	49357275	49504366	924442	1.05021296917357	0.305458043252793	48895054	179897254	49042145	cela1_red_5_48579924	cela1_red_5_49504366
LG3.b.761.20	Both	-2818.07120077886	-2817.27945009988	3	761	20	780	2582	179880161	48877961	49025052	2601	181016953	50014753	50161844	1136792	1.58350135796718	0.20825707118469	49446357	180448557	49593448	cela1_red_5_49025052	cela1_red_5_50161844
LG3.b.761.20	Male	-884.660583049318	-884.660583940749	3	761	20	780	2582	179880161	48877961	49025052	2601	181016953	50014753	50161844	1136792	-1.78286109075998e-06	1	49446357	180448557	49593448	cela1_red_5_49025052	cela1_red_5_50161844
LG3.b.761.20	Female	-1896.58250425542	-1894.65569791887	3	761	20	780	2582	179880161	48877961	49025052	2601	181016953	50014753	50161844	1136792	3.85361267311828	0.0496389627006255	49446357	180448557	49593448	cela1_red_5_49025052	cela1_red_5_50161844
LG3.b.771.20	Both	-2818.07863705944	-2816.8763611104	3	771	20	790	2592	180414628	49412428	49559519	2611	181704417	50702217	50849308	1289789	2.40455189807926	0.120982762814578	50057322.5	181059522.5	50204413.5	cela1_red_5_49559519	cela1_red_5_50849308
LG3.b.771.20	Male	-884.660138426868	-884.660139789076	3	771	20	790	2592	180414628	49412428	49559519	2611	181704417	50702217	50849308	1289789	-2.72441661763878e-06	1	50057322.5	181059522.5	50204413.5	cela1_red_5_49559519	cela1_red_5_50849308
LG3.b.771.20	Female	-1896.59041634506	-1894.24021954664	3	771	20	790	2592	180414628	49412428	49559519	2611	181704417	50702217	50849308	1289789	4.70039359685052	0.0301557107255235	50057322.5	181059522.5	50204413.5	cela1_red_5_49559519	cela1_red_5_50849308
LG3.b.781.20	Both	-2818.06535030152	-2817.75557678842	3	781	20	800	2602	181070371	50068171	50215262	2621	182455050	51452850	51599941	1384679	0.619547026210057	0.431215663646342	50760510.5	181762710.5	50907601.5	cela1_red_5_50215262	cela1_red_5_51599941
LG3.b.781.20	Male	-884.661473803696	-884.655719007554	3	781	20	800	2602	181070371	50068171	50215262	2621	182455050	51452850	51599941	1384679	0.011509592284483	0.914564654874638	50760510.5	181762710.5	50907601.5	cela1_red_5_50215262	cela1_red_5_51599941
LG3.b.781.20	Female	-1896.58273300061	-1895.48057982272	3	781	20	800	2602	181070371	50068171	50215262	2621	182455050	51452850	51599941	1384679	2.20430635577804	0.137625787026239	50760510.5	181762710.5	50907601.5	cela1_red_5_50215262	cela1_red_5_51599941
LG3.b.791.20	Both	-2818.06322934935	-2817.85018760623	3	791	20	810	2612	181978993	50976793	51123884	2631	183458138	52455938	52603029	1479145	0.426083486227071	0.513917006304939	51716365.5	182718565.5	51863456.5	cela1_red_5_51123884	cela1_red_5_52603029
LG3.b.791.20	Male	-884.662570365906	-884.411608236862	3	791	20	810	2612	181978993	50976793	51123884	2631	183458138	52455938	52603029	1479145	0.501924258088366	0.478655837955157	51716365.5	182718565.5	51863456.5	cela1_red_5_51123884	cela1_red_5_52603029
LG3.b.791.20	Female	-1896.57728016754	-1895.9867109871	3	791	20	810	2612	181978993	50976793	51123884	2631	183458138	52455938	52603029	1479145	1.18113836089469	0.277124369718285	51716365.5	182718565.5	51863456.5	cela1_red_5_51123884	cela1_red_5_52603029
LG3.b.801.20	Both	-2818.07941064865	-2817.30407821968	3	801	20	820	2622	182619516	51617316	51764407	2641	184165900	53163700	53310791	1546384	1.55066485792395	0.213037316681238	52390508	183392708	52537599	cela1_red_5_51764407	cela1_red_5_53310791
LG3.b.801.20	Male	-884.663110314464	-884.077251449497	3	801	20	820	2622	182619516	51617316	51764407	2641	184165900	53163700	53310791	1546384	1.17171772993424	0.279048574203099	52390508	183392708	52537599	cela1_red_5_51764407	cela1_red_5_53310791
LG3.b.801.20	Female	-1896.59421363088	-1895.04229552465	3	801	20	820	2622	182619516	51617316	51764407	2641	184165900	53163700	53310791	1546384	3.10383621246092	0.0781080368368778	52390508	183392708	52537599	cela1_red_5_51764407	cela1_red_5_53310791
LG3.b.811.20	Both	-2818.08634332325	-2817.28239686843	3	811	20	830	2632	183479299	52477099	52624190	2651	184754303	53752103	53899194	1275004	1.60789290963748	0.204788247160477	53114601	184116801	53261692	cela1_red_5_52624190	cela1_red_5_53899194
LG3.b.811.20	Male	-884.662492692051	-884.602917007601	3	811	20	830	2632	183479299	52477099	52624190	2651	184754303	53752103	53899194	1275004	0.11915136890002	0.729956727050188	53114601	184116801	53261692	cela1_red_5_52624190	cela1_red_5_53899194
LG3.b.811.20	Female	-1896.60045143348	-1895.01366402353	3	811	20	830	2632	183479299	52477099	52624190	2651	184754303	53752103	53899194	1275004	3.1735748198962	0.0748384751891438	53114601	184116801	53261692	cela1_red_5_52624190	cela1_red_5_53899194
LG3.b.815.20	Both	-2818.07519593718	-2817.22118193389	3	815	20	834	2636	183914257	52912057	53059148	2655	185022414	54020214	54167305	1108157	1.70802800657839	0.191241426582775	53466135.5	184468335.5	53613226.5	cela1_red_5_53059148	cela1_red_5_54167305
LG3.b.815.20	Male	-884.662140648524	-884.541110809757	3	815	20	834	2636	183914257	52912057	53059148	2655	185022414	54020214	54167305	1108157	0.242059677534144	0.622722448926091	53466135.5	184468335.5	53613226.5	cela1_red_5_53059148	cela1_red_5_54167305
LG3.b.815.20	Female	-1896.58292458932	-1895.69434092411	3	815	20	834	2636	183914257	52912057	53059148	2655	185022414	54020214	54167305	1108157	1.77716733041962	0.182497546998494	53466135.5	184468335.5	53613226.5	cela1_red_5_53059148	cela1_red_5_54167305
LG4.b.1.20	Both	-2818.04640582128	-2818.04641321895	4	1	20	20	2707	188732862	1033920	384536	2726	190200039	2501097	1851713	1467177	-1.47953360283282e-05	1	1767508.5	189466450.5	1118124.5	cela1_sika_18_384536	cela1_sika_18_1851713
LG4.b.1.20	Male	-884.661855797162	-884.638576919664	4	1	20	20	2707	188732862	1033920	384536	2726	190200039	2501097	1851713	1467177	0.0465577549946374	0.829165115475488	1767508.5	189466450.5	1118124.5	cela1_sika_18_384536	cela1_sika_18_1851713
LG4.b.1.20	Female	-1896.56061614052	-1896.56062191635	4	1	20	20	2707	188732862	1033920	384536	2726	190200039	2501097	1851713	1467177	-1.15516454570752e-05	1	1767508.5	189466450.5	1118124.5	cela1_sika_18_384536	cela1_sika_18_1851713
LG4.b.11.20	Both	-2818.04302948306	-2818.04304033981	4	11	20	30	2717	189553322	1854380	1204996	2736	190662393	2963451	2314067	1109071	-2.17134938793606e-05	1	2408915.5	190107857.5	1759531.5	cela1_red_18_1204996	cela1_red_18_2314067
LG4.b.11.20	Male	-884.661871780822	-884.633464131959	4	11	20	30	2717	189553322	1854380	1204996	2736	190662393	2963451	2314067	1109071	0.0568152977259615	0.811602200917539	2408915.5	190107857.5	1759531.5	cela1_red_18_1204996	cela1_red_18_2314067
LG4.b.11.20	Female	-1896.56142597604	-1896.5614313081	4	11	20	30	2717	189553322	1854380	1204996	2736	190662393	2963451	2314067	1109071	-1.06641218735604e-05	1	2408915.5	190107857.5	1759531.5	cela1_red_18_1204996	cela1_red_18_2314067
LG4.b.21.20	Both	-2818.04642442475	-2818.04643156309	4	21	20	40	2727	190208901	2509959	1860575	2746	191219895	3520953	2871569	1010994	-1.42766748467693e-05	1	3015456	190714398	2366072	cela1_red_18_1860575	cela1_sika_18_2871569
LG4.b.21.20	Male	-884.66250318217	-884.507324815626	4	21	20	40	2727	190208901	2509959	1860575	2746	191219895	3520953	2871569	1010994	0.31035673308952	0.577461362146091	3015456	190714398	2366072	cela1_red_18_1860575	cela1_sika_18_2871569
LG4.b.21.20	Female	-1896.56568968598	-1896.56569025661	4	21	20	40	2727	190208901	2509959	1860575	2746	191219895	3520953	2871569	1010994	-1.14124441097374e-06	1	3015456	190714398	2366072	cela1_red_18_1860575	cela1_sika_18_2871569
LG4.b.31.20	Both	-2818.05628180073	-2818.05020481746	4	31	20	50	2737	190707047	3008105	2358721	2756	191637280	3938338	3288954	930233	0.0121539665396995	0.912215051480318	3473221.5	191172163.5	2823837.5	cela1_red_18_2358721	cela1_red_18_3288954
LG4.b.31.20	Male	-884.661998580427	-884.566817645666	4	31	20	50	2737	190707047	3008105	2358721	2756	191637280	3938338	3288954	930233	0.190361869520984	0.662615607204582	3473221.5	191172163.5	2823837.5	cela1_red_18_2358721	cela1_red_18_3288954
LG4.b.31.20	Female	-1896.56764433253	-1896.55004313102	4	31	20	50	2737	190707047	3008105	2358721	2756	191637280	3938338	3288954	930233	0.0352024030230496	0.851172168101188	3473221.5	191172163.5	2823837.5	cela1_red_18_2358721	cela1_red_18_3288954
LG4.b.41.20	Both	-2818.0614540418	-2817.99101317791	4	41	20	60	2747	191254174	3555232	2905848	2766	192023404	4324462	3675078	769230	0.140881727779743	0.707406024312568	3939847	191638789	3290463	cela1_sika_18_2905848	cela1_red_18_3675078
LG4.b.41.20	Male	-884.659597730954	-884.659600375322	4	41	20	60	2747	191254174	3555232	2905848	2766	192023404	4324462	3675078	769230	-5.28873533767182e-06	1	3939847	191638789	3290463	cela1_sika_18_2905848	cela1_red_18_3675078
LG4.b.41.20	Female	-1896.56736348874	-1896.56137848018	4	41	20	60	2747	191254174	3555232	2905848	2766	192023404	4324462	3675078	769230	0.0119700171235309	0.912879227082742	3939847	191638789	3290463	cela1_sika_18_2905848	cela1_red_18_3675078
LG4.b.51.20	Both	-2818.05506461758	-2818.05506523329	4	51	20	70	2757	191718566	4019624	3370240	2776	192661815	4962873	4313489	943249	-1.23141762742307e-06	1	4491248.5	192190190.5	3841864.5	cela1_red_18_3370240	cela1_red_18_4313489
LG4.b.51.20	Male	-884.660565592689	-884.660567249952	4	51	20	70	2757	191718566	4019624	3370240	2776	192661815	4962873	4313489	943249	-3.31452588397951e-06	1	4491248.5	192190190.5	3841864.5	cela1_red_18_3370240	cela1_red_18_4313489
LG4.b.51.20	Female	-1896.5644235968	-1896.56442582025	4	51	20	70	2757	191718566	4019624	3370240	2776	192661815	4962873	4313489	943249	-4.44689840151113e-06	1	4491248.5	192190190.5	3841864.5	cela1_red_18_3370240	cela1_red_18_4313489
LG4.b.61.20	Both	-2818.04878865536	-2818.04879477154	4	61	20	80	2767	192106344	4407402	3758018	2786	193292607	5593665	4944281	1186263	-1.22323681353009e-05	1	5000533.5	192699475.5	4351149.5	cela1_red_18_3758018	cela1_red_18_4944281
LG4.b.61.20	Male	-884.662273606096	-884.430695301341	4	61	20	80	2767	192106344	4407402	3758018	2786	193292607	5593665	4944281	1186263	0.463156609510179	0.496152410878287	5000533.5	192699475.5	4351149.5	cela1_red_18_3758018	cela1_red_18_4944281
LG4.b.61.20	Female	-1896.56074555801	-1896.56075173815	4	61	20	80	2767	192106344	4407402	3758018	2786	193292607	5593665	4944281	1186263	-1.23602885651053e-05	1	5000533.5	192699475.5	4351149.5	cela1_red_18_3758018	cela1_red_18_4944281
LG4.b.71.20	Both	-2818.04121620961	-2818.04122788668	4	71	20	90	2777	192686752	4987810	4338426	2796	194063629	6364687	5715303	1376877	-2.33541541092563e-05	1	5676248.5	193375190.5	5026864.5	cela1_red_18_4338426	cela1_red_18_5715303
LG4.b.71.20	Male	-884.663615782413	-884.351723189699	4	71	20	90	2777	192686752	4987810	4338426	2796	194063629	6364687	5715303	1376877	0.623785185428005	0.42964415551344	5676248.5	193375190.5	5026864.5	cela1_red_18_4338426	cela1_red_18_5715303
LG4.b.71.20	Female	-1896.55647982514	-1896.55648967927	4	71	20	90	2777	192686752	4987810	4338426	2796	194063629	6364687	5715303	1376877	-1.97082576960383e-05	1	5676248.5	193375190.5	5026864.5	cela1_red_18_4338426	cela1_red_18_5715303
LG4.b.81.20	Both	-2818.05066897259	-2818.05068240217	4	81	20	100	2787	193316629	5617687	4968303	2806	194492517	6793575	6144191	1175888	-2.68591757048853e-05	1	6205631	193904573	5556247	cela1_red_18_4968303	cela1_red_18_6144191
LG4.b.81.20	Male	-884.662125373088	-884.621527416713	4	81	20	100	2787	193316629	5617687	4968303	2806	194492517	6793575	6144191	1175888	0.0811959127506725	0.77568324150742	6205631	193904573	5556247	cela1_red_18_4968303	cela1_red_18_6144191
LG4.b.81.20	Female	-1896.56477055863	-1896.56477164538	4	81	20	100	2787	193316629	5617687	4968303	2806	194492517	6793575	6144191	1175888	-2.17349543163436e-06	1	6205631	193904573	5556247	cela1_red_18_4968303	cela1_red_18_6144191
LG4.b.91.20	Both	-2818.06254235634	-2817.87408929413	4	91	20	110	2797	194147956	6449014	5799630	2816	195012584	7313642	6664258	864628	0.376906124433845	0.539263694894089	6881328	194580270	6231944	cela1_red_18_5799630	cela1_red_18_6664258
LG4.b.91.20	Male	-884.660829570927	-884.660830288079	4	91	20	110	2797	194147956	6449014	5799630	2816	195012584	7313642	6664258	864628	-1.43430361276842e-06	1	6881328	194580270	6231944	cela1_red_18_5799630	cela1_red_18_6664258
LG4.b.91.20	Female	-1896.57158984103	-1896.32001391259	4	91	20	110	2797	194147956	6449014	5799630	2816	195012584	7313642	6664258	864628	0.503151856873046	0.478118487774078	6881328	194580270	6231944	cela1_red_18_5799630	cela1_red_18_6664258
LG4.b.101.20	Both	-2818.06637817688	-2817.46452155894	4	101	20	120	2807	194534381	6835439	6186055	2826	195666720	7967778	7318394	1132339	1.20371323588006	0.272580783193873	7401608.5	195100550.5	6752224.5	cela1_red_18_6186055	cela1_red_18_7318394
LG4.b.101.20	Male	-884.660657675892	-884.660658418438	4	101	20	120	2807	194534381	6835439	6186055	2826	195666720	7967778	7318394	1132339	-1.48509116115747e-06	1	7401608.5	195100550.5	6752224.5	cela1_red_18_6186055	cela1_red_18_7318394
LG4.b.101.20	Female	-1896.57105306003	-1896.14824616147	4	101	20	120	2807	194534381	6835439	6186055	2826	195666720	7967778	7318394	1132339	0.845613797110673	0.357796142016461	7401608.5	195100550.5	6752224.5	cela1_red_18_6186055	cela1_red_18_7318394
LG4.b.111.20	Both	-2818.07595568846	-2817.09247545265	4	111	20	130	2817	195033636	7334694	6685310	2836	196599770	8900828	8251444	1566134	1.9669604716164	0.16077086068707	8117761	195816703	7468377	cela1_red_18_6685310	cela1_red_18_8251444
LG4.b.111.20	Male	-884.660766036346	-884.660767063543	4	111	20	130	2817	195033636	7334694	6685310	2836	196599770	8900828	8251444	1566134	-2.05439255296369e-06	1	8117761	195816703	7468377	cela1_red_18_6685310	cela1_red_18_8251444
LG4.b.111.20	Female	-1896.57212784678	-1896.1730220877	4	111	20	130	2817	195033636	7334694	6685310	2836	196599770	8900828	8251444	1566134	0.7982115181685	0.371628634682261	8117761	195816703	7468377	cela1_red_18_6685310	cela1_red_18_8251444
LG4.b.121.20	Both	-2818.07043806531	-2817.59684332662	4	121	20	140	2827	195865260	8166318	7516934	2846	198407269	10708327	10058943	2542009	0.947189477381471	0.330435724890025	9437322.5	197136264.5	8787938.5	cela1_sika_18_7516934	cela1_red_18_10058943
LG4.b.121.20	Male	-884.662186495165	-884.512744441472	4	121	20	140	2827	195865260	8166318	7516934	2846	198407269	10708327	10058943	2542009	0.298884107385447	0.584582832303525	9437322.5	197136264.5	8787938.5	cela1_sika_18_7516934	cela1_red_18_10058943
LG4.b.121.20	Female	-1896.57016538239	-1896.4865307994	4	121	20	140	2827	195865260	8166318	7516934	2846	198407269	10708327	10058943	2542009	0.167269165991456	0.682550278177037	9437322.5	197136264.5	8787938.5	cela1_sika_18_7516934	cela1_red_18_10058943
LG4.b.131.20	Both	-2818.06039587057	-2817.98592842691	4	131	20	150	2837	196607555	8908613	8259229	2856	199144631	11445689	10796305	2537076	0.148934887311952	0.699555303038666	10177151	197876093	9527767	cela1_sika_18_8259229	cela1_red_18_10796305
LG4.b.131.20	Male	-884.662637242081	-884.199881594193	4	131	20	150	2837	196607555	8908613	8259229	2856	199144631	11445689	10796305	2537076	0.925511295776914	0.336032034816172	10177151	197876093	9527767	cela1_sika_18_8259229	cela1_red_18_10796305
LG4.b.131.20	Female	-1896.56844002641	-1896.55101510317	4	131	20	150	2837	196607555	8908613	8259229	2856	199144631	11445689	10796305	2537076	0.0348498464754812	0.851910647504028	10177151	197876093	9527767	cela1_sika_18_8259229	cela1_red_18_10796305
LG4.b.141.20	Both	-2818.06068137103	-2817.97934974532	4	141	20	160	2847	198519444	10820502	10171118	2866	199740298	12041356	11391972	1220854	0.16266325142351	0.686716269205859	11430929	199129871	10781545	cela1_red_18_10171118	cela1_red_18_11391972
LG4.b.141.20	Male	-884.662942698809	-884.397558903913	4	141	20	160	2847	198519444	10820502	10171118	2866	199740298	12041356	11391972	1220854	0.530767589791594	0.466284327493462	11430929	199129871	10781545	cela1_red_18_10171118	cela1_red_18_11391972
LG4.b.141.20	Female	-1896.56508040738	-1896.56508299578	4	141	20	160	2847	198519444	10820502	10171118	2866	199740298	12041356	11391972	1220854	-5.17679973199847e-06	1	11430929	199129871	10781545	cela1_red_18_10171118	cela1_red_18_11391972
LG4.b.151.20	Both	-2818.06468468441	-2817.92619101351	4	151	20	170	2857	199160311	11461369	10811985	2876	200119655	12420713	11771329	959344	0.276987341801032	0.598682652752874	11941041	199639983	11291657	cela1_red_18_10811985	cela1_red_18_11771329
LG4.b.151.20	Male	-884.662567349761	-884.528960914834	4	151	20	170	2857	199160311	11461369	10811985	2876	200119655	12420713	11771329	959344	0.26721286985412	0.605207560148199	11941041	199639983	11291657	cela1_red_18_10811985	cela1_red_18_11771329
LG4.b.151.20	Female	-1896.56478270099	-1896.56478440659	4	151	20	170	2857	199160311	11461369	10811985	2876	200119655	12420713	11771329	959344	-3.41120039593079e-06	1	11941041	199639983	11291657	cela1_red_18_10811985	cela1_red_18_11771329
LG4.b.161.20	Both	-2818.07210664553	-2817.68040473765	4	161	20	180	2867	199779062	12080120	11430736	2886	200611380	12912438	12263054	832318	0.783403815761631	0.37610214933597	12496279	200195221	11846895	cela1_red_18_11430736	cela1_red_18_12263054
LG4.b.161.20	Male	-884.661536645129	-884.640474040996	4	161	20	180	2867	199779062	12080120	11430736	2886	200611380	12912438	12263054	832318	0.0421252082664978	0.837381287136999	12496279	200195221	11846895	cela1_red_18_11430736	cela1_red_18_12263054
LG4.b.161.20	Female	-1896.57366123975	-1896.37229670233	4	161	20	180	2867	199779062	12080120	11430736	2886	200611380	12912438	12263054	832318	0.402729074835861	0.525683204035023	12496279	200195221	11846895	cela1_red_18_11430736	cela1_red_18_12263054
LG4.b.171.20	Both	-2818.08448580987	-2817.18119564214	4	171	20	190	2877	200132716	12433774	11784390	2896	201649985	13951043	13301659	1517269	1.80658033546933	0.178918995844759	13192408.5	200891350.5	12543024.5	cela1_red_18_11784390	cela1_red_18_13301659
LG4.b.171.20	Male	-884.660478479921	-884.660480901419	4	171	20	190	2877	200132716	12433774	11784390	2896	201649985	13951043	13301659	1517269	-4.84299562231172e-06	1	13192408.5	200891350.5	12543024.5	cela1_red_18_11784390	cela1_red_18_13301659
LG4.b.171.20	Female	-1896.59019382714	-1895.37471345165	4	171	20	190	2877	200132716	12433774	11784390	2896	201649985	13951043	13301659	1517269	2.43096075099447	0.118959969038447	13192408.5	200891350.5	12543024.5	cela1_red_18_11784390	cela1_red_18_13301659
LG4.b.181.20	Both	-2818.08538726097	-2816.93992284333	4	181	20	200	2887	200680080	12981138	12331754	2906	202238159	14539217	13889833	1558079	2.29092883528119	0.130132026368698	13760177.5	201459119.5	13110793.5	cela1_red_18_12331754	cela1_red_18_13889833
LG4.b.181.20	Male	-884.661145626885	-884.661145992362	4	181	20	200	2887	200680080	12981138	12331754	2906	202238159	14539217	13889833	1558079	-7.30952706362586e-07	1	13760177.5	201459119.5	13110793.5	cela1_red_18_12331754	cela1_red_18_13889833
LG4.b.181.20	Female	-1896.58697610367	-1895.33654974936	4	181	20	200	2887	200680080	12981138	12331754	2906	202238159	14539217	13889833	1558079	2.50085270862883	0.113784674981701	13760177.5	201459119.5	13110793.5	cela1_red_18_12331754	cela1_red_18_13889833
LG4.b.191.20	Both	-2818.0759357443	-2817.35187639302	4	191	20	210	2897	201672744	13973802	13324418	2916	202849338	15150396	14501012	1176594	1.44811870254853	0.228830062623906	14562099	202261041	13912715	cela1_red_18_13324418	cela1_red_18_14501012
LG4.b.191.20	Male	-884.661894777592	-884.556770039619	4	191	20	210	2897	201672744	13973802	13324418	2916	202849338	15150396	14501012	1176594	0.21024947594583	0.646571937582168	14562099	202261041	13912715	cela1_red_18_13324418	cela1_red_18_14501012
LG4.b.191.20	Female	-1896.57703507665	-1896.17295925273	4	191	20	210	2897	201672744	13973802	13324418	2916	202849338	15150396	14501012	1176594	0.808151647841441	0.36866728141145	14562099	202261041	13912715	cela1_red_18_13324418	cela1_red_18_14501012
LG4.b.201.20	Both	-2818.07764081573	-2817.19937413543	4	201	20	220	2907	202275307	14576365	13926981	2926	203282938	15583996	14934612	1007631	1.75653336060805	0.185057501540261	15080180.5	202779122.5	14430796.5	cela1_red_18_13926981	cela1_red_18_14934612
LG4.b.201.20	Male	-884.661726958311	-884.255820442094	4	201	20	220	2907	202275307	14576365	13926981	2926	203282938	15583996	14934612	1007631	0.811813032435111	0.367584769465016	15080180.5	202779122.5	14430796.5	cela1_red_18_13926981	cela1_red_18_14934612
LG4.b.201.20	Female	-1896.57862919477	-1896.17115721686	4	201	20	220	2907	202275307	14576365	13926981	2926	203282938	15583996	14934612	1007631	0.8149439558224	0.3666625938746	15080180.5	202779122.5	14430796.5	cela1_red_18_13926981	cela1_red_18_14934612
LG4.b.211.20	Both	-2818.06692480368	-2817.57866660632	4	211	20	230	2917	202854154	15155212	14505828	2936	203884534	16185592	15536208	1030380	0.976516394708597	0.323060368151637	15670402	203369344	15021018	cela1_red_18_14505828	cela1_red_18_15536208
LG4.b.211.20	Male	-884.661719441923	-884.622230946898	4	211	20	230	2917	202854154	15155212	14505828	2936	203884534	16185592	15536208	1030380	0.0789769900516148	0.778688578375563	15670402	203369344	15021018	cela1_red_18_14505828	cela1_red_18_15536208
LG4.b.211.20	Female	-1896.56829709959	-1896.52252439381	4	211	20	230	2917	202854154	15155212	14505828	2936	203884534	16185592	15536208	1030380	0.0915454115638568	0.762221602027052	15670402	203369344	15021018	cela1_red_18_14505828	cela1_red_18_15536208
LG4.b.221.20	Both	-2818.05555503335	-2818.05555521196	4	221	20	240	2927	203308851	15609909	14960525	2946	204677968	16979026	16329642	1369117	-3.57231328962371e-07	1	16294467.5	203993409.5	15645083.5	cela1_red_18_14960525	cela1_red_18_16329642
LG4.b.221.20	Male	-884.661960745663	-884.622728931779	4	221	20	240	2927	203308851	15609909	14960525	2946	204677968	16979026	16329642	1369117	0.0784636277676327	0.779390352482602	16294467.5	203993409.5	15645083.5	cela1_red_18_14960525	cela1_red_18_16329642
LG4.b.221.20	Female	-1896.56496426297	-1896.56496681755	4	221	20	240	2927	203308851	15609909	14960525	2946	204677968	16979026	16329642	1369117	-5.10917288920609e-06	1	16294467.5	203993409.5	15645083.5	cela1_red_18_14960525	cela1_red_18_16329642
LG4.b.231.20	Both	-2818.05644160545	-2818.05330204053	4	231	20	250	2937	203938837	16239895	15590511	2956	205481199	17782257	17132873	1542362	0.0062791298432785	0.936840965124154	17011076	204710018	16361692	cela1_red_18_15590511	cela1_red_18_17132873
LG4.b.231.20	Male	-884.662408821627	-884.593566436629	4	231	20	250	2937	203938837	16239895	15590511	2956	205481199	17782257	17132873	1542362	0.13768476999644	0.710593599300082	17011076	204710018	16361692	cela1_red_18_15590511	cela1_red_18_17132873
LG4.b.231.20	Female	-1896.57051149096	-1896.39958200184	4	231	20	250	2937	203938837	16239895	15590511	2956	205481199	17782257	17132873	1542362	0.341858978223627	0.558758144907642	17011076	204710018	16361692	cela1_red_18_15590511	cela1_red_18_17132873
LG4.b.241.20	Both	-2818.07224170359	-2817.02775986918	4	241	20	260	2947	204721116	17022174	16372790	2966	205993720	18294778	17645394	1272604	2.08896366882345	0.148366685595708	17658476	205357418	17009092	cela1_red_18_16372790	cela1_red_18_17645394
LG4.b.241.20	Male	-884.660508706247	-884.660509852936	4	241	20	260	2947	204721116	17022174	16372790	2966	205993720	18294778	17645394	1272604	-2.29337729251711e-06	1	17658476	205357418	17009092	cela1_red_18_16372790	cela1_red_18_17645394
LG4.b.241.20	Female	-1896.58358988107	-1894.83326820776	4	241	20	260	2947	204721116	17022174	16372790	2966	205993720	18294778	17645394	1272604	3.50064334662011	0.0613449940974558	17658476	205357418	17009092	cela1_red_18_16372790	cela1_red_18_17645394
LG4.b.251.20	Both	-2818.07985604853	-2816.55658828959	4	251	20	270	2957	205526040	17827098	17177714	2976	206563005	18864063	18214679	1036965	3.04653551788488	0.0809095674172032	18345580.5	206044522.5	17696196.5	cela1_red_18_17177714	cela1_red_18_18214679
LG4.b.251.20	Male	-884.659527298957	-884.659529848033	4	251	20	270	2957	205526040	17827098	17177714	2976	206563005	18864063	18214679	1036965	-5.09815276927839e-06	1	18345580.5	206044522.5	17696196.5	cela1_red_18_17177714	cela1_red_18_18214679
LG4.b.251.20	Female	-1896.58514521157	-1894.91649637192	4	251	20	270	2957	205526040	17827098	17177714	2976	206563005	18864063	18214679	1036965	3.33729767929526	0.0677257523511522	18345580.5	206044522.5	17696196.5	cela1_red_18_17177714	cela1_red_18_18214679
LG4.b.261.20	Both	-2818.06553909282	-2817.60124389612	4	261	20	280	2967	206094791	18395849	17746465	2986	206967768	19268826	18619442	872977	0.928590393416926	0.335229478528243	18832337.5	206531279.5	18182953.5	cela1_red_18_17746465	cela1_red_18_18619442
LG4.b.261.20	Male	-884.660365295509	-884.660366578076	4	261	20	280	2967	206094791	18395849	17746465	2986	206967768	19268826	18619442	872977	-2.56513362728583e-06	1	18832337.5	206531279.5	18182953.5	cela1_red_18_17746465	cela1_red_18_18619442
LG4.b.261.20	Female	-1896.57198780793	-1896.23346922198	4	261	20	280	2967	206094791	18395849	17746465	2986	206967768	19268826	18619442	872977	0.677037171908523	0.410608834084701	18832337.5	206531279.5	18182953.5	cela1_red_18_17746465	cela1_red_18_18619442
LG4.b.271.20	Both	-2818.05307262743	-2818.05308004761	4	271	20	290	2977	206597627	18898685	18249301	2996	207512567	19813625	19164241	914940	-1.48403514685924e-05	1	19356155	207055097	18706771	cela1_red_18_18249301	cela1_red_18_19164241
LG4.b.271.20	Male	-884.660090666845	-884.660092530173	4	271	20	290	2977	206597627	18898685	18249301	2996	207512567	19813625	19164241	914940	-3.72665590475663e-06	1	19356155	207055097	18706771	cela1_red_18_18249301	cela1_red_18_19164241
LG4.b.271.20	Female	-1896.56426174398	-1896.56426443237	4	271	20	290	2977	206597627	18898685	18249301	2996	207512567	19813625	19164241	914940	-5.37678533873986e-06	1	19356155	207055097	18706771	cela1_red_18_18249301	cela1_red_18_19164241
LG4.b.281.20	Both	-2818.05560840763	-2818.05560866825	4	281	20	300	2987	207002931	19303989	18654605	3006	208107261	20408319	19758935	1104330	-5.21238689543679e-07	1	19856154	207555096	19206770	cela1_red_18_18654605	cela1_red_18_19758935
LG4.b.281.20	Male	-884.659746927995	-884.659749432601	4	281	20	300	2987	207002931	19303989	18654605	3006	208107261	20408319	19758935	1104330	-5.00921305501834e-06	1	19856154	207555096	19206770	cela1_red_18_18654605	cela1_red_18_19758935
LG4.b.281.20	Female	-1896.56683357589	-1896.56583311613	4	281	20	300	2987	207002931	19303989	18654605	3006	208107261	20408319	19758935	1104330	0.00200091951592185	0.964321214759749	19856154	207555096	19206770	cela1_red_18_18654605	cela1_red_18_19758935
LG4.b.291.20	Both	-2818.07315326359	-2817.44836970002	4	291	20	310	2997	207572280	19873338	19223954	3016	208842837	21143895	20494511	1270557	1.24956712715175	0.263635169751834	20508616.5	208207558.5	19859232.5	cela1_red_18_19223954	cela1_red_18_20494511
LG4.b.291.20	Male	-884.660143299223	-884.660144813635	4	291	20	310	2997	207572280	19873338	19223954	3016	208842837	21143895	20494511	1270557	-3.02882472169586e-06	1	20508616.5	208207558.5	19859232.5	cela1_red_18_19223954	cela1_red_18_20494511
LG4.b.291.20	Female	-1896.57886119401	-1895.93219988145	4	291	20	310	2997	207572280	19873338	19223954	3016	208842837	21143895	20494511	1270557	1.29332262512935	0.25543653492194	20508616.5	208207558.5	19859232.5	cela1_red_18_19223954	cela1_red_18_20494511
LG4.b.301.20	Both	-2818.07612872299	-2817.43699446419	4	301	20	320	3007	208162934	20463992	19814608	3026	209589934	21890992	21241608	1427000	1.27826851761165	0.258221223516802	21177492	208876434	20528108	cela1_red_18_19814608	cela1_red_18_21241608
LG4.b.301.20	Male	-884.660687998673	-884.660690885578	4	301	20	320	3007	208162934	20463992	19814608	3026	209589934	21890992	21241608	1427000	-5.77380956201523e-06	1	21177492	208876434	20528108	cela1_red_18_19814608	cela1_red_18_21241608
LG4.b.301.20	Female	-1896.57717279574	-1896.23998309259	4	301	20	320	3007	208162934	20463992	19814608	3026	209589934	21890992	21241608	1427000	0.674379406297248	0.411528900686454	21177492	208876434	20528108	cela1_red_18_19814608	cela1_red_18_21241608
LG4.b.311.20	Both	-2818.06100083902	-2817.9973605331	4	311	20	330	3017	208871775	21172833	20523449	3036	210112087	22413145	21763761	1240312	0.127280611844071	0.721268425782466	21792989	209491931	21143605	cela1_red_18_20523449	cela1_red_18_21763761
LG4.b.311.20	Male	-884.660344159077	-884.660347031041	4	311	20	330	3017	208871775	21172833	20523449	3036	210112087	22413145	21763761	1240312	-5.74392743146745e-06	1	21792989	209491931	21143605	cela1_red_18_20523449	cela1_red_18_21763761
LG4.b.311.20	Female	-1896.56649369112	-1896.56645745731	4	311	20	330	3017	208871775	21172833	20523449	3036	210112087	22413145	21763761	1240312	7.24676228855969e-05	0.993207856951637	21792989	209491931	21143605	cela1_red_18_20523449	cela1_red_18_21763761
LG4.b.321.20	Both	-2818.0544557706	-2818.05445649152	4	321	20	340	3027	209693337	21994395	21345011	3046	210651215	22952273	22302889	957878	-1.44184195960406e-06	1	22473334	210172276	21823950	cela1_red_18_21345011	cela1_red_18_22302889
LG4.b.321.20	Male	-884.660867878506	-884.660869459607	4	321	20	340	3027	209693337	21994395	21345011	3046	210651215	22952273	22302889	957878	-3.16220211971086e-06	1	22473334	210172276	21823950	cela1_red_18_21345011	cela1_red_18_22302889
LG4.b.321.20	Female	-1896.56279866253	-1896.56280181841	4	321	20	340	3027	209693337	21994395	21345011	3046	210651215	22952273	22302889	957878	-6.31175953458296e-06	1	22473334	210172276	21823950	cela1_red_18_21345011	cela1_red_18_22302889
LG4.b.331.20	Both	-2818.05842407357	-2818.01667163732	4	331	20	350	3037	210144197	22445255	21795871	3056	211123213	23424271	22774887	979016	0.0835048725175511	0.772602730863964	22934763	210633705	22285379	cela1_red_18_21795871	cela1_red_18_22774887
LG4.b.331.20	Male	-884.66283825276	-884.233552139195	4	331	20	350	3037	210144197	22445255	21795871	3056	211123213	23424271	22774887	979016	0.858572227129571	0.354138552308817	22934763	210633705	22285379	cela1_red_18_21795871	cela1_red_18_22774887
LG4.b.331.20	Female	-1896.56268151858	-1896.56268483773	4	331	20	350	3037	210144197	22445255	21795871	3056	211123213	23424271	22774887	979016	-6.63828814140288e-06	1	22934763	210633705	22285379	cela1_red_18_21795871	cela1_red_18_22774887
LG4.b.341.20	Both	-2818.04886722958	-2818.04887262997	4	341	20	360	3047	210673135	22974193	22324809	3066	212066564	24367622	23718238	1393429	-1.0800772543007e-05	1	23670907.5	211369849.5	23021523.5	cela1_red_18_22324809	cela1_red_18_23718238
LG4.b.341.20	Male	-884.663428546905	-883.697227970915	4	341	20	360	3047	210673135	22974193	22324809	3066	212066564	24367622	23718238	1393429	1.93240115198046	0.164495986044168	23670907.5	211369849.5	23021523.5	cela1_red_18_22324809	cela1_red_18_23718238
LG4.b.341.20	Female	-1896.55817185021	-1896.55817977397	4	341	20	360	3047	210673135	22974193	22324809	3066	212066564	24367622	23718238	1393429	-1.58475249918411e-05	1	23670907.5	211369849.5	23021523.5	cela1_red_18_22324809	cela1_red_18_23718238
LG4.b.351.20	Both	-2818.03888080796	-2818.03889618959	4	351	20	370	3057	211185455	23486513	22837129	3076	212751157	25052215	24402831	1565702	-3.07632690237369e-05	1	24269364	211968306	23619980	cela1_red_18_22837129	cela1_red_18_24402831
LG4.b.351.20	Male	-884.661853001517	-884.460720600413	4	351	20	370	3057	211185455	23486513	22837129	3076	212751157	25052215	24402831	1565702	0.402264802207128	0.525921930616924	24269364	211968306	23619980	cela1_red_18_22837129	cela1_red_18_24402831
LG4.b.351.20	Female	-1896.5552385428	-1896.5552512901	4	351	20	370	3057	211185455	23486513	22837129	3076	212751157	25052215	24402831	1565702	-2.54946121458488e-05	1	24269364	211968306	23619980	cela1_red_18_22837129	cela1_red_18_24402831
LG4.b.361.20	Both	-2818.04456594571	-2818.04458816435	4	361	20	380	3067	212170734	24471792	23822408	3086	213497837	25798895	25149511	1327103	-4.4437274482334e-05	1	25135343.5	212834285.5	24485959.5	cela1_red_18_23822408	cela1_red_18_25149511
LG4.b.361.20	Male	-884.661275965166	-884.660489333037	4	361	20	380	3067	212170734	24471792	23822408	3086	213497837	25798895	25149511	1327103	0.00157326425892279	0.968360687716188	25135343.5	212834285.5	24485959.5	cela1_red_18_23822408	cela1_red_18_25149511
LG4.b.361.20	Female	-1896.55777637853	-1896.55778662043	4	361	20	380	3067	212170734	24471792	23822408	3086	213497837	25798895	25149511	1327103	-2.04837851924822e-05	1	25135343.5	212834285.5	24485959.5	cela1_red_18_23822408	cela1_red_18_25149511
LG4.b.371.20	Both	-2818.0485500573	-2818.04855609827	4	371	20	390	3077	212756949	25058007	24408623	3096	214104762	26405820	25756436	1347813	-1.20819331641542e-05	1	25731913.5	213430855.5	25082529.5	cela1_red_18_24408623	cela1_red_18_25756436
LG4.b.371.20	Male	-884.661539752042	-884.650907944417	4	371	20	390	3077	212756949	25058007	24408623	3096	214104762	26405820	25756436	1347813	0.0212636152491541	0.884063100268286	25731913.5	213430855.5	25082529.5	cela1_red_18_24408623	cela1_red_18_25756436
LG4.b.371.20	Female	-1896.56213341065	-1896.56213795438	4	371	20	390	3077	212756949	25058007	24408623	3096	214104762	26405820	25756436	1347813	-9.08746005734429e-06	1	25731913.5	213430855.5	25082529.5	cela1_red_18_24408623	cela1_red_18_25756436
LG4.b.381.20	Both	-2818.04855858554	-2818.04856454053	4	381	20	400	3087	213565048	25866106	25216722	3106	214818652	27119710	26470326	1253604	-1.1909965905943e-05	1	26492908	214191850	25843524	cela1_red_18_25216722	cela1_red_18_26470326
LG4.b.381.20	Male	-884.660624138802	-884.660625129414	4	381	20	400	3087	213565048	25866106	25216722	3106	214818652	27119710	26470326	1253604	-1.98122438632709e-06	1	26492908	214191850	25843524	cela1_red_18_25216722	cela1_red_18_26470326
LG4.b.381.20	Female	-1896.56245817277	-1896.5624623306	4	381	20	400	3087	213565048	25866106	25216722	3106	214818652	27119710	26470326	1253604	-8.3156719483668e-06	1	26492908	214191850	25843524	cela1_red_18_25216722	cela1_red_18_26470326
LG4.b.391.20	Both	-2818.05884232357	-2817.92137981305	4	391	20	410	3097	214169329	26470387	25821003	3116	215376684	27677742	27028358	1207355	0.274925021037234	0.600046997144816	27074064.5	214773006.5	26424680.5	cela1_red_18_25821003	cela1_red_18_27028358
LG4.b.391.20	Male	-884.660225545018	-884.660227083303	4	391	20	410	3097	214169329	26470387	25821003	3116	215376684	27677742	27028358	1207355	-3.0765688734391e-06	1	27074064.5	214773006.5	26424680.5	cela1_red_18_25821003	cela1_red_18_27028358
LG4.b.391.20	Female	-1896.56836837104	-1896.47573011303	4	391	20	410	3097	214169329	26470387	25821003	3116	215376684	27677742	27028358	1207355	0.185276516032445	0.666877358687992	27074064.5	214773006.5	26424680.5	cela1_red_18_25821003	cela1_red_18_27028358
LG4.b.401.20	Both	-2818.06174972545	-2817.7741936585	4	401	20	420	3107	214854095	27155153	26505769	3126	215975650	28276708	27627324	1121555	0.575112133898074	0.448234611517575	27715930.5	215414872.5	27066546.5	cela1_red_18_26505769	cela1_red_18_27627324
LG4.b.401.20	Male	-884.661250616918	-884.661250873551	4	401	20	420	3107	214854095	27155153	26505769	3126	215975650	28276708	27627324	1121555	-5.13266513735289e-07	1	27715930.5	215414872.5	27066546.5	cela1_red_18_26505769	cela1_red_18_27627324
LG4.b.401.20	Female	-1896.56902803074	-1896.47343347809	4	401	20	420	3107	214854095	27155153	26505769	3126	215975650	28276708	27627324	1121555	0.191189105297326	0.661928772852246	27715930.5	215414872.5	27066546.5	cela1_red_18_26505769	cela1_red_18_27627324
LG4.b.411.20	Both	-2818.06015546797	-2817.98994831143	4	411	20	430	3117	215464173	27765231	27115847	3136	216538750	28839808	28190424	1074577	0.14041431309397	0.707869475973133	28302519.5	216001461.5	27653135.5	cela1_red_18_27115847	cela1_red_18_28190424
LG4.b.411.20	Male	-884.662933223517	-884.442091576381	4	411	20	430	3117	215464173	27765231	27115847	3136	216538750	28839808	28190424	1074577	0.441683294273389	0.506311117905558	28302519.5	216001461.5	27653135.5	cela1_red_18_27115847	cela1_red_18_28190424
LG4.b.411.20	Female	-1896.56656912886	-1896.56656912711	4	411	20	430	3117	215464173	27765231	27115847	3136	216538750	28839808	28190424	1074577	3.50974005414173e-09	0.999952730877819	28302519.5	216001461.5	27653135.5	cela1_red_18_27115847	cela1_red_18_28190424
LG4.b.421.20	Both	-2818.06042603142	-2817.99905955447	4	421	20	440	3127	216054555	28355613	27706229	3146	217034792	29335850	28686466	980237	0.122732953899686	0.726089077373623	28845731.5	216544673.5	28196347.5	cela1_red_18_27706229	cela1_red_18_28686466
LG4.b.421.20	Male	-884.662574722992	-884.387828662592	4	421	20	440	3127	216054555	28355613	27706229	3146	217034792	29335850	28686466	980237	0.54949212079805	0.458525287564756	28845731.5	216544673.5	28196347.5	cela1_red_18_27706229	cela1_red_18_28686466
LG4.b.421.20	Female	-1896.57060157161	-1896.46440383097	4	421	20	440	3127	216054555	28355613	27706229	3146	217034792	29335850	28686466	980237	0.212395481275962	0.644896294420047	28845731.5	216544673.5	28196347.5	cela1_red_18_27706229	cela1_red_18_28686466
LG4.b.431.20	Both	-2818.06264331817	-2817.99308617226	4	431	20	450	3137	216593922	28894980	28245596	3156	217979108	30280166	29630782	1385186	0.139114291825535	0.709163118402228	29587573	217286515	28938189	cela1_red_18_28245596	cela1_red_18_29630782
LG4.b.431.20	Male	-884.661214859886	-884.661214837414	4	431	20	450	3137	216593922	28894980	28245596	3156	217979108	30280166	29630782	1385186	4.49429080617847e-08	0.999830850529202	29587573	217286515	28938189	cela1_red_18_28245596	cela1_red_18_29630782
LG4.b.431.20	Female	-1896.57469289225	-1896.34426531309	4	431	20	450	3137	216593922	28894980	28245596	3156	217979108	30280166	29630782	1385186	0.460855158306003	0.497224584813782	29587573	217286515	28938189	cela1_red_18_28245596	cela1_red_18_29630782
LG4.b.441.20	Both	-2818.06090028321	-2818.00342288135	4	441	20	460	3147	217072593	29373651	28724267	3166	218670107	30971165	30321781	1597514	0.114954803711953	0.734572173726654	30172408	217871350	29523024	cela1_red_18_28724267	cela1_red_18_30321781
LG4.b.441.20	Male	-884.661022128224	-884.661022586551	4	441	20	460	3147	217072593	29373651	28724267	3166	218670107	30971165	30321781	1597514	-9.16654926186311e-07	1	30172408	217871350	29523024	cela1_red_18_28724267	cela1_red_18_30321781
LG4.b.441.20	Female	-1896.57188800729	-1896.42435290778	4	441	20	460	3147	217072593	29373651	28724267	3166	218670107	30971165	30321781	1597514	0.295070199020302	0.586989597807145	30172408	217871350	29523024	cela1_red_18_28724267	cela1_red_18_30321781
LG4.b.451.20	Both	-2818.05057151274	-2818.05057594585	4	451	20	470	3157	218070689	30371747	29722363	3176	219213101	31514159	30864775	1142412	-8.86622183315922e-06	1	30942953	218641895	30293569	cela1_red_18_29722363	cela1_red_18_30864775
LG4.b.451.20	Male	-884.660568750678	-884.660573093403	4	451	20	470	3157	218070689	30371747	29722363	3176	219213101	31514159	30864775	1142412	-8.68545021148748e-06	1	30942953	218641895	30293569	cela1_red_18_29722363	cela1_red_18_30864775
LG4.b.451.20	Female	-1896.56333760829	-1896.56334189162	4	451	20	470	3157	218070689	30371747	29722363	3176	219213101	31514159	30864775	1142412	-8.56665064929985e-06	1	30942953	218641895	30293569	cela1_red_18_29722363	cela1_red_18_30864775
LG4.b.461.20	Both	-2818.04680952314	-2818.04681686212	4	461	20	480	3167	218761020	31062078	30412694	3186	219603195	31904253	31254869	842175	-1.46779566421174e-05	1	31483165.5	219182107.5	30833781.5	cela1_red_18_30412694	cela1_red_18_31254869
LG4.b.461.20	Male	-884.661868309938	-884.570773116282	4	461	20	480	3167	218761020	31062078	30412694	3186	219603195	31904253	31254869	842175	0.182190387311039	0.669497574809212	31483165.5	219182107.5	30833781.5	cela1_red_18_30412694	cela1_red_18_31254869
LG4.b.461.20	Female	-1896.56120457719	-1896.56121009114	4	461	20	480	3167	218761020	31062078	30412694	3186	219603195	31904253	31254869	842175	-1.1027898381144e-05	1	31483165.5	219182107.5	30833781.5	cela1_red_18_30412694	cela1_red_18_31254869
LG4.b.471.20	Both	-2818.0500300789	-2818.05003489535	4	471	20	490	3177	219251235	31552293	30902909	3196	219957461	32258519	31609135	706226	-9.63290949584916e-06	1	31905406	219604348	31256022	cela1_red_18_30902909	cela1_red_18_31609135
LG4.b.471.20	Male	-884.661991803643	-884.583212179732	4	471	20	490	3177	219251235	31552293	30902909	3196	219957461	32258519	31609135	706226	0.1575592478207	0.691413671779222	31905406	219604348	31256022	cela1_red_18_30902909	cela1_red_18_31609135
LG4.b.471.20	Female	-1896.56263235216	-1896.562636435	4	471	20	490	3177	219251235	31552293	30902909	3196	219957461	32258519	31609135	706226	-8.16568126538186e-06	1	31905406	219604348	31256022	cela1_red_18_30902909	cela1_red_18_31609135
LG4.b.481.20	Both	-2818.05108834239	-2818.05109246675	4	481	20	500	3187	219620105	31921163	31271779	3206	220523226	32824284	32174900	903121	-8.24872313387459e-06	1	32372723.5	220071665.5	31723339.5	cela1_red_18_31271779	cela1_red_18_32174900
LG4.b.481.20	Male	-884.661361377278	-884.658457476724	4	481	20	500	3187	219620105	31921163	31271779	3206	220523226	32824284	32174900	903121	0.00580780110681189	0.939252877743783	32372723.5	220071665.5	31723339.5	cela1_red_18_31271779	cela1_red_18_32174900
LG4.b.481.20	Female	-1896.56408254309	-1896.5640853986	4	481	20	500	3187	219620105	31921163	31271779	3206	220523226	32824284	32174900	903121	-5.71103282709373e-06	1	32372723.5	220071665.5	31723339.5	cela1_red_18_31271779	cela1_red_18_32174900
LG4.b.491.20	Both	-2818.04951077095	-2818.04951578145	4	491	20	510	3197	219984117	32285175	31635791	3216	221353169	33654227	33004843	1369052	-1.00210145319579e-05	1	32969701	220668643	32320317	cela1_red_18_31635791	cela1_red_18_33004843
LG4.b.491.20	Male	-884.662226357342	-884.56957901116	4	491	20	510	3197	219984117	32285175	31635791	3216	221353169	33654227	33004843	1369052	0.185294692364778	0.666862003284817	32969701	220668643	32320317	cela1_red_18_31635791	cela1_red_18_33004843
LG4.b.491.20	Female	-1896.56290658441	-1896.56291029077	4	491	20	510	3197	219984117	32285175	31635791	3216	221353169	33654227	33004843	1369052	-7.41272879167809e-06	1	32969701	220668643	32320317	cela1_red_18_31635791	cela1_red_18_33004843
LG4.b.501.20	Both	-2818.05466907413	-2818.0546725119	4	501	20	520	3207	220596475	32897533	32248149	3226	222277233	34578291	33928907	1680758	-6.87554893374909e-06	1	33737912	221436854	33088528	cela1_red_18_32248149	cela1_red_18_33928907
LG4.b.501.20	Male	-884.661691869947	-884.632668872128	4	501	20	520	3207	220596475	32897533	32248149	3226	222277233	34578291	33928907	1680758	0.0580459956377126	0.809611411846885	33737912	221436854	33088528	cela1_red_18_32248149	cela1_red_18_33928907
LG4.b.501.20	Female	-1896.56392566526	-1896.56392828363	4	501	20	520	3207	220596475	32897533	32248149	3226	222277233	34578291	33928907	1680758	-5.23674680152908e-06	1	33737912	221436854	33088528	cela1_red_18_32248149	cela1_red_18_33928907
LG4.b.511.20	Both	-2818.04953128645	-2818.04954202184	4	511	20	530	3217	221461229	33762287	33112903	3236	222773148	35074206	34424822	1311919	-2.1470766114362e-05	1	34418246.5	222117188.5	33768862.5	cela1_red_18_33112903	cela1_red_18_34424822
LG4.b.511.20	Male	-884.66260066412	-884.529847076033	4	511	20	530	3217	221461229	33762287	33112903	3236	222773148	35074206	34424822	1311919	0.265507176174424	0.606361645446356	34418246.5	222117188.5	33768862.5	cela1_red_18_33112903	cela1_red_18_34424822
LG4.b.511.20	Female	-1896.56122854391	-1896.56123360725	4	511	20	530	3217	221461229	33762287	33112903	3236	222773148	35074206	34424822	1311919	-1.01266869023675e-05	1	34418246.5	222117188.5	33768862.5	cela1_red_18_33112903	cela1_red_18_34424822
LG4.b.521.20	Both	-2818.04553369626	-2818.04554261201	4	521	20	540	3227	222346654	34647712	33998328	3246	223980038	36281096	36365641	1633384	-1.78314876393415e-05	1	35464404	223163346	35181984.5	cela1_red_18_33998328	cela1_red_18_36365641
LG4.b.521.20	Male	-884.663203620387	-884.413349181655	4	521	20	540	3227	222346654	34647712	33998328	3246	223980038	36281096	36365641	1633384	0.4997088774644	0.479628066830523	35464404	223163346	35181984.5	cela1_red_18_33998328	cela1_red_18_36365641
LG4.b.521.20	Female	-1896.5571802725	-1896.5571902918	4	521	20	540	3227	222346654	34647712	33998328	3246	223980038	36281096	36365641	1633384	-2.00385889002064e-05	1	35464404	223163346	35181984.5	cela1_red_18_33998328	cela1_red_18_36365641
LG4.b.531.20	Both	-2818.06518368829	-2817.86972433207	4	531	20	550	3237	222835250	35136308	34486924	3256	224492024	36793082	36877627	1656774	0.390918712446364	0.531816882458393	35964695	223663637	35682275.5	cela1_red_18_34486924	cela1_red_18_36877627
LG4.b.531.20	Male	-884.66493022071	-883.749109764213	4	531	20	550	3237	222835250	35136308	34486924	3256	224492024	36793082	36877627	1656774	1.83164091299523	0.175933851930098	35964695	223663637	35682275.5	cela1_red_18_34486924	cela1_red_18_36877627
LG4.b.531.20	Female	-1896.56452650977	-1896.56452922411	4	531	20	550	3237	222835250	35136308	34486924	3256	224492024	36793082	36877627	1656774	-5.42867519470747e-06	1	35964695	223663637	35682275.5	cela1_red_18_34486924	cela1_red_18_36877627
LG4.b.541.20	Both	-2818.06282692158	-2817.85931940889	4	541	20	560	3247	223994358	36295416	36379961	3266	225043034	37344092	37428637	1048676	0.407015025380133	0.523488461964019	36819754	224518696	36904299	cela1_red_18_36379961	cela1_red_18_37428637
LG4.b.541.20	Male	-884.662980533688	-884.269934171816	4	541	20	560	3247	223994358	36295416	36379961	3266	225043034	37344092	37428637	1048676	0.786092723743877	0.37528422114574	36819754	224518696	36904299	cela1_red_18_36379961	cela1_red_18_37428637
LG4.b.541.20	Female	-1896.56853234719	-1896.5409354814	4	541	20	560	3247	223994358	36295416	36379961	3266	225043034	37344092	37428637	1048676	0.0551937315649411	0.814260377387606	36819754	224518696	36904299	cela1_red_18_36379961	cela1_red_18_37428637
LG4.b.551.20	Both	-2818.04622124222	-2818.04622975481	4	551	20	570	3257	224566134	36867192	36951737	3276	225694866	37995924	38080469	1128732	-1.70251851159264e-05	1	37431558	225130500	37516103	cela1_red_18_36951737	cela1_red_18_38080469
LG4.b.551.20	Male	-884.659897016722	-884.659899349693	4	551	20	570	3257	224566134	36867192	36951737	3276	225694866	37995924	38080469	1128732	-4.66594201498083e-06	1	37431558	225130500	37516103	cela1_red_18_36951737	cela1_red_18_38080469
LG4.b.551.20	Female	-1896.56267705646	-1896.56268140601	4	551	20	570	3257	224566134	36867192	36951737	3276	225694866	37995924	38080469	1128732	-8.69908808454056e-06	1	37431558	225130500	37516103	cela1_red_18_36951737	cela1_red_18_38080469
LG4.b.561.20	Both	-2818.04939838651	-2818.04940408056	4	561	20	580	3267	225136927	37437985	37522530	3286	226583697	38884755	38969300	1446770	-1.13880951175815e-05	1	38161370	225860312	38245915	cela1_red_18_37522530	cela1_red_18_38969300
LG4.b.561.20	Male	-884.661569342879	-884.655565661611	4	561	20	580	3267	225136927	37437985	37522530	3286	226583697	38884755	38969300	1446770	0.0120073625366786	0.91274397053642	38161370	225860312	38245915	cela1_red_18_37522530	cela1_red_18_38969300
LG4.b.561.20	Female	-1896.56151105234	-1896.56151655941	4	561	20	580	3267	225136927	37437985	37522530	3286	226583697	38884755	38969300	1446770	-1.10141509139794e-05	1	38161370	225860312	38245915	cela1_red_18_37522530	cela1_red_18_38969300
LG4.b.571.20	Both	-2818.0467899823	-2818.04679730505	4	571	20	590	3277	225908488	38209546	38294091	3296	227389718	39690776	39775321	1481230	-1.46455022331793e-05	1	38950161	226649103	39034706	cela1_red_18_38294091	cela1_red_18_39775321
LG4.b.571.20	Male	-884.660582466365	-884.660583403218	4	571	20	590	3277	225908488	38209546	38294091	3296	227389718	39690776	39775321	1481230	-1.87370665116759e-06	1	38950161	226649103	39034706	cela1_red_18_38294091	cela1_red_18_39775321
LG4.b.571.20	Female	-1896.56185544608	-1896.56186020407	4	571	20	590	3277	225908488	38209546	38294091	3296	227389718	39690776	39775321	1481230	-9.51598030951573e-06	1	38950161	226649103	39034706	cela1_red_18_38294091	cela1_red_18_39775321
LG4.b.581.20	Both	-2818.04076088254	-2818.04077184296	4	581	20	600	3287	226696493	38997551	39082096	3306	227970201	40271259	40355804	1273708	-2.19208441194496e-05	1	39634405	227333347	39718950	cela1_red_18_39082096	cela1_red_18_40355804
LG4.b.581.20	Male	-884.659097992904	-884.659101104487	4	581	20	600	3287	226696493	38997551	39082096	3306	227970201	40271259	40355804	1273708	-6.22316451881488e-06	1	39634405	227333347	39718950	cela1_red_18_39082096	cela1_red_18_40355804
LG4.b.581.20	Female	-1896.55866168931	-1896.55866887601	4	581	20	600	3287	226696493	38997551	39082096	3306	227970201	40271259	40355804	1273708	-1.43734014272923e-05	1	39634405	227333347	39718950	cela1_red_18_39082096	cela1_red_18_40355804
LG4.b.591.20	Both	-2818.04927304328	-2818.04927793151	4	591	20	610	3297	227408280	39709338	39793883	3316	228750631	41051689	41136234	1342351	-9.776464139577e-06	1	40380513.5	228079455.5	40465058.5	cela1_red_18_39793883	cela1_red_18_41136234
LG4.b.591.20	Male	-884.659652224193	-884.659654872284	4	591	20	610	3297	227408280	39709338	39793883	3316	228750631	41051689	41136234	1342351	-5.29618318978464e-06	1	40380513.5	228079455.5	40465058.5	cela1_red_18_39793883	cela1_red_18_41136234
LG4.b.591.20	Female	-1896.56247768122	-1896.56248130838	4	591	20	610	3297	227408280	39709338	39793883	3316	228750631	41051689	41136234	1342351	-7.2543211899756e-06	1	40380513.5	228079455.5	40465058.5	cela1_red_18_39793883	cela1_red_18_41136234
LG4.b.601.20	Both	-2818.06075696064	-2818.01684448118	4	601	20	620	3307	228053192	40354250	40438795	3326	229595032	41896090	41980635	1541840	0.0878249589313782	0.766960697067251	41125170	228824112	41209715	cela1_red_18_40438795	cela1_red_18_41980635
LG4.b.601.20	Male	-884.660722197159	-884.660723021622	4	601	20	620	3307	228053192	40354250	40438795	3326	229595032	41896090	41980635	1541840	-1.64892662724014e-06	1	41125170	228824112	41209715	cela1_red_18_40438795	cela1_red_18_41980635
LG4.b.601.20	Female	-1896.56868098045	-1896.54628091688	4	601	20	620	3307	228053192	40354250	40438795	3326	229595032	41896090	41980635	1541840	0.0448001271361136	0.832371980240161	41125170	228824112	41209715	cela1_red_18_40438795	cela1_red_18_41980635
LG4.b.611.20	Both	-2818.06031005013	-2818.02144544019	4	611	20	630	3317	228900233	41201291	41285836	3336	230414300	42715358	42799903	1514067	0.0777292198772557	0.780398617428863	41958324.5	229657266.5	42042869.5	cela1_red_18_41285836	cela1_red_18_42799903
LG4.b.611.20	Male	-884.660645319637	-884.660646298893	4	611	20	630	3317	228900233	41201291	41285836	3336	230414300	42715358	42799903	1514067	-1.95851157513971e-06	1	41958324.5	229657266.5	42042869.5	cela1_red_18_41285836	cela1_red_18_42799903
LG4.b.611.20	Female	-1896.56949882098	-1896.52523702094	4	611	20	630	3317	228900233	41201291	41285836	3336	230414300	42715358	42799903	1514067	0.0885236000844998	0.766062550172337	41958324.5	229657266.5	42042869.5	cela1_red_18_41285836	cela1_red_18_42799903
LG4.b.621.20	Both	-2818.06338665991	-2817.86534117053	4	621	20	640	3327	229631492	41932550	42017095	3346	230873170	43174228	43258773	1241678	0.396090978772918	0.52911497486361	42553389	230252331	42637934	cela1_red_18_42017095	cela1_red_18_43258773
LG4.b.621.20	Male	-884.659607867663	-884.659610576897	4	621	20	640	3327	229631492	41932550	42017095	3346	230873170	43174228	43258773	1241678	-5.41846702617477e-06	1	42553389	230252331	42637934	cela1_red_18_42017095	cela1_red_18_43258773
LG4.b.621.20	Female	-1896.57110459754	-1896.34879918106	4	621	20	640	3327	229631492	41932550	42017095	3346	230873170	43174228	43258773	1241678	0.444610832945727	0.504905357158206	42553389	230252331	42637934	cela1_red_18_42017095	cela1_red_18_43258773
LG4.b.631.20	Both	-2818.06804387638	-2817.72081362166	4	631	20	650	3337	230459901	42760959	42845504	3356	231347417	43648475	43733020	887516	0.694460509439523	0.404651327285074	43204717	230903659	43289262	cela1_red_18_42845504	cela1_red_18_43733020
LG4.b.631.20	Male	-884.660147910612	-884.660149706865	4	631	20	650	3337	230459901	42760959	42845504	3356	231347417	43648475	43733020	887516	-3.59250725523452e-06	1	43204717	230903659	43289262	cela1_red_18_42845504	cela1_red_18_43733020
LG4.b.631.20	Female	-1896.57127251185	-1896.40696339895	4	631	20	650	3337	230459901	42760959	42845504	3356	231347417	43648475	43733020	887516	0.328618225805712	0.566473861777221	43204717	230903659	43289262	cela1_red_18_42845504	cela1_red_18_43733020
LG4.b.641.20	Both	-2818.06554684482	-2817.93883683559	4	641	20	660	3347	230951460	43252518	43337063	3366	231783036	44084094	44168639	831576	0.253420018457291	0.61467716613274	43668306	231367248	43752851	cela1_red_18_43337063	cela1_red_18_44168639
LG4.b.641.20	Male	-884.661894897775	-884.646677376086	4	641	20	660	3347	230951460	43252518	43337063	3366	231783036	44084094	44168639	831576	0.0304350433784748	0.861506775285367	43668306	231367248	43752851	cela1_red_18_43337063	cela1_red_18_44168639
LG4.b.641.20	Female	-1896.56717111326	-1896.56464552747	4	641	20	660	3347	230951460	43252518	43337063	3366	231783036	44084094	44168639	831576	0.00505117158627399	0.943340775058676	43668306	231367248	43752851	cela1_red_18_43337063	cela1_red_18_44168639
LG4.b.651.20	Both	-2818.06149477602	-2818.01103059011	4	651	20	670	3357	231349689	43650747	43735292	3376	232281219	44582277	44666822	931530	0.100928371823102	0.750718383207643	44116512	231815454	44201057	cela1_sika_18_43735292	cela1_red_18_44666822
LG4.b.651.20	Male	-884.661915712613	-884.64501521485	4	651	20	670	3357	231349689	43650747	43735292	3376	232281219	44582277	44666822	931530	0.0338009955264624	0.854130761129437	44116512	231815454	44201057	cela1_sika_18_43735292	cela1_red_18_44666822
LG4.b.651.20	Female	-1896.56512302884	-1896.56512446803	4	651	20	670	3357	231349689	43650747	43735292	3376	232281219	44582277	44666822	931530	-2.8783879315597e-06	1	44116512	231815454	44201057	cela1_sika_18_43735292	cela1_red_18_44666822
LG4.b.661.20	Both	-2818.0530800942	-2818.05308093551	4	661	20	680	3367	231864716	44165774	44250319	3386	232719693	45020751	45105296	854977	-1.68262158695143e-06	1	44593262.5	232292204.5	44677807.5	cela1_red_18_44250319	cela1_red_18_45105296
LG4.b.661.20	Male	-884.661183454285	-884.661184222894	4	661	20	680	3367	231864716	44165774	44250319	3386	232719693	45020751	45105296	854977	-1.53721839524223e-06	1	44593262.5	232292204.5	44677807.5	cela1_red_18_44250319	cela1_red_18_45105296
LG4.b.661.20	Female	-1896.56278213634	-1896.56278586367	4	661	20	680	3367	231864716	44165774	44250319	3386	232719693	45020751	45105296	854977	-7.45466240914539e-06	1	44593262.5	232292204.5	44677807.5	cela1_red_18_44250319	cela1_red_18_45105296
LG4.b.671.20	Both	-2818.04485452449	-2818.04486352586	4	671	20	690	3377	232311239	44612297	44696842	3396	233753877	46054935	46139480	1442638	-1.80027509486536e-05	1	45333616	233032558	45418161	cela1_red_18_44696842	cela1_red_18_46139480
LG4.b.671.20	Male	-884.663189049312	-884.35019251632	4	671	20	690	3377	232311239	44612297	44696842	3396	233753877	46054935	46139480	1442638	0.625993065983494	0.42882890427075	45333616	233032558	45418161	cela1_red_18_44696842	cela1_red_18_46139480
LG4.b.671.20	Female	-1896.5574231537	-1896.55743254168	4	671	20	690	3377	232311239	44612297	44696842	3396	233753877	46054935	46139480	1442638	-1.87759546861344e-05	1	45333616	233032558	45418161	cela1_red_18_44696842	cela1_red_18_46139480
LG4.b.681.20	Both	-2818.05183291783	-2818.05183623615	4	681	20	700	3387	232741420	45042478	45127023	3406	234655100	46956158	47040703	1913680	-6.63663013256155e-06	1	45999318	233698260	46083863	cela1_red_18_45127023	cela1_red_18_47040703
LG4.b.681.20	Male	-884.665253659166	-883.794347270108	4	681	20	700	3387	232741420	45042478	45127023	3406	234655100	46956158	47040703	1913680	1.74181277811635	0.186909299607505	45999318	233698260	46083863	cela1_red_18_45127023	cela1_red_18_47040703
LG4.b.681.20	Female	-1896.56143079494	-1896.56143610198	4	681	20	700	3387	232741420	45042478	45127023	3406	234655100	46956158	47040703	1913680	-1.06140755633533e-05	1	45999318	233698260	46083863	cela1_red_18_45127023	cela1_red_18_47040703
LG4.b.691.20	Both	-2818.05338561827	-2818.05338772967	4	691	20	710	3397	233789618	46090676	46175221	3416	235144744	47445802	47530347	1355126	-4.22281482315157e-06	1	46768239	234467181	46852784	cela1_red_18_46175221	cela1_red_18_47530347
LG4.b.691.20	Male	-884.66459695677	-883.996919273182	4	691	20	710	3397	233789618	46090676	46175221	3416	235144744	47445802	47530347	1355126	1.33535536717523	0.24785472238913	46768239	234467181	46852784	cela1_red_18_46175221	cela1_red_18_47530347
LG4.b.691.20	Female	-1896.56256697268	-1896.56257118414	4	691	20	710	3397	233789618	46090676	46175221	3416	235144744	47445802	47530347	1355126	-8.42291001390549e-06	1	46768239	234467181	46852784	cela1_red_18_46175221	cela1_red_18_47530347
LG4.b.701.20	Both	-2818.04681263369	-2818.0468449277	4	701	20	720	3407	234698711	46999769	47084314	3426	235885902	48186960	48271505	1187191	-6.45880272713839e-05	1	47593364.5	235292306.5	47677909.5	cela1_red_18_47084314	cela1_red_18_48271505
LG4.b.701.20	Male	-884.662608924345	-884.527758693592	4	701	20	720	3407	234698711	46999769	47084314	3426	235885902	48186960	48271505	1187191	0.269700461506773	0.60353277601269	47593364.5	235292306.5	47677909.5	cela1_red_18_47084314	cela1_red_18_48271505
LG4.b.701.20	Female	-1896.56067131547	-1896.56068686996	4	701	20	720	3407	234698711	46999769	47084314	3426	235885902	48186960	48271505	1187191	-3.11089852402802e-05	1	47593364.5	235292306.5	47677909.5	cela1_red_18_47084314	cela1_red_18_48271505
LG4.b.711.20	Both	-2818.04084527295	-2818.04085734668	4	711	20	730	3417	235193350	47494408	47578953	3436	236547177	48848235	48932780	1353827	-2.41474726863089e-05	1	48171321.5	235870263.5	48255866.5	cela1_red_18_47578953	cela1_red_18_48932780
LG4.b.711.20	Male	-884.659816692483	-884.659818973265	4	711	20	730	3417	235193350	47494408	47578953	3436	236547177	48848235	48932780	1353827	-4.56156431027921e-06	1	48171321.5	235870263.5	48255866.5	cela1_red_18_47578953	cela1_red_18_48932780
LG4.b.711.20	Female	-1896.55830462449	-1896.55831282396	4	711	20	730	3417	235193350	47494408	47578953	3436	236547177	48848235	48932780	1353827	-1.63989361681161e-05	1	48171321.5	235870263.5	48255866.5	cela1_red_18_47578953	cela1_red_18_48932780
LG4.b.721.20	Both	-2818.0482582598	-2818.04826364566	4	721	20	740	3427	235934199	48235257	48319802	3446	237182868	49483926	49568471	1248669	-1.07717178252642e-05	1	48859591.5	236558533.5	48944136.5	cela1_red_18_48319802	cela1_red_18_49568471
LG4.b.721.20	Male	-884.6585805932	-884.658584289159	4	721	20	740	3427	235934199	48235257	48319802	3446	237182868	49483926	49568471	1248669	-7.39191727916477e-06	1	48859591.5	236558533.5	48944136.5	cela1_red_18_48319802	cela1_red_18_49568471
LG4.b.721.20	Female	-1896.5646035116	-1896.56460734086	4	721	20	740	3427	235934199	48235257	48319802	3446	237182868	49483926	49568471	1248669	-7.65852382755838e-06	1	48859591.5	236558533.5	48944136.5	cela1_red_18_48319802	cela1_red_18_49568471
LG4.b.731.20	Both	-2818.06330508143	-2817.8008764991	4	731	20	750	3437	236582288	48883346	48967891	3456	237723904	50024962	50109507	1141616	0.524857164667083	0.468777075960487	49454154	237153096	49538699	cela1_red_18_48967891	cela1_red_18_50109507
LG4.b.731.20	Male	-884.661923764399	-884.61398446805	4	731	20	750	3437	236582288	48883346	48967891	3456	237723904	50024962	50109507	1141616	0.0958785926964083	0.756832692163653	49454154	237153096	49538699	cela1_red_18_48967891	cela1_red_18_50109507
LG4.b.731.20	Female	-1896.57281884409	-1896.21069940462	4	731	20	750	3437	236582288	48883346	48967891	3456	237723904	50024962	50109507	1141616	0.724238878939559	0.394756990172853	49454154	237153096	49538699	cela1_red_18_48967891	cela1_red_18_50109507
LG4.b.741.20	Both	-2818.0597053952	-2818.01116315153	4	741	20	760	3447	237195098	49496156	49580701	3466	238332660	50633718	50718263	1137562	0.0970844873436363	0.755356819520771	50064937	237763879	50149482	cela1_red_18_49580701	cela1_red_18_50718263
LG4.b.741.20	Male	-884.662206574023	-884.601627624978	4	741	20	760	3447	237195098	49496156	49580701	3466	238332660	50633718	50718263	1137562	0.121157898090132	0.727782033104086	50064937	237763879	50149482	cela1_red_18_49580701	cela1_red_18_50718263
LG4.b.741.20	Female	-1896.56841586059	-1896.536349275	4	741	20	760	3447	237195098	49496156	49580701	3466	238332660	50633718	50718263	1137562	0.0641331711699422	0.800078679256902	50064937	237763879	50149482	cela1_red_18_49580701	cela1_red_18_50718263
LG4.b.751.20	Both	-2818.05617519532	-2818.05548676325	4	751	20	770	3457	237732146	50033204	50117749	3476	239105122	51406180	51490725	1372976	0.00137686414291238	0.970400392320584	50719692	238418634	50804237	cela1_red_18_50117749	cela1_red_18_51490725
LG4.b.751.20	Male	-884.659926100609	-884.65992856873	4	751	20	770	3457	237732146	50033204	50117749	3476	239105122	51406180	51490725	1372976	-4.93624293085304e-06	1	50719692	238418634	50804237	cela1_red_18_50117749	cela1_red_18_51490725
LG4.b.751.20	Female	-1896.56772153819	-1896.55850650377	4	751	20	770	3457	237732146	50033204	50117749	3476	239105122	51406180	51490725	1372976	0.0184300688461008	0.892013077245332	50719692	238418634	50804237	cela1_red_18_50117749	cela1_red_18_51490725
LG4.b.761.20	Both	-2818.06535507755	-2817.59073561219	4	761	20	780	3467	238354073	50655131	50739676	3486	239733161	52034219	52118764	1379088	0.949238930721549	0.329913096621196	51344675	239043617	51429220	cela1_red_18_50739676	cela1_red_18_52118764
LG4.b.761.20	Male	-884.660456096538	-884.660458540252	4	761	20	780	3467	238354073	50655131	50739676	3486	239733161	52034219	52118764	1379088	-4.88742693960376e-06	1	51344675	239043617	51429220	cela1_red_18_50739676	cela1_red_18_52118764
LG4.b.761.20	Female	-1896.57302043815	-1896.06876762891	4	761	20	780	3467	238354073	50655131	50739676	3486	239733161	52034219	52118764	1379088	1.00850561847392	0.315261112910199	51344675	239043617	51429220	cela1_red_18_50739676	cela1_red_18_52118764
LG4.b.771.20	Both	-2818.0692146124	-2817.36883666198	4	771	20	790	3477	239152242	51453300	51537845	3496	240277736	52578794	52663339	1125494	1.40075590083688	0.236597049216555	52016047	239714989	52100592	cela1_red_18_51537845	cela1_red_18_52663339
LG4.b.771.20	Male	-884.660155292455	-884.660156672606	4	771	20	790	3477	239152242	51453300	51537845	3496	240277736	52578794	52663339	1125494	-2.76030209533928e-06	1	52016047	239714989	52100592	cela1_red_18_51537845	cela1_red_18_52663339
LG4.b.771.20	Female	-1896.57446000178	-1895.90462485374	4	771	20	790	3477	239152242	51453300	51537845	3496	240277736	52578794	52663339	1125494	1.3396702960772	0.247092120526521	52016047	239714989	52100592	cela1_red_18_51537845	cela1_red_18_52663339
LG4.b.781.20	Both	-2818.08627373029	-2816.87618665314	4	781	20	800	3487	239761917	52062975	52147520	3506	240698671	52999729	53084274	936754	2.42017415429109	0.119781613207647	52531352	240230294	52615897	cela1_red_18_52147520	cela1_red_18_53084274
LG4.b.781.20	Male	-884.663726033733	-883.875608545168	4	781	20	800	3487	239761917	52062975	52147520	3506	240698671	52999729	53084274	936754	1.57623497713053	0.209303849246066	52531352	240230294	52615897	cela1_red_18_52147520	cela1_red_18_53084274
LG4.b.781.20	Female	-1896.58103188917	-1895.73741029967	4	781	20	800	3487	239761917	52062975	52147520	3506	240698671	52999729	53084274	936754	1.68724317900205	0.19396477785174	52531352	240230294	52615897	cela1_red_18_52147520	cela1_red_18_53084274
LG4.b.791.20	Both	-2818.08993416761	-2816.50121262473	4	791	20	810	3497	240311135	52612193	52696738	3516	241259560	53560618	53645163	948425	3.17744308575129	0.0746614778114578	53086405.5	240785347.5	53170950.5	cela1_red_18_52696738	cela1_red_18_53645163
LG4.b.791.20	Male	-884.665199373446	-883.55235582117	4	791	20	810	3497	240311135	52612193	52696738	3516	241259560	53560618	53645163	948425	2.22568710455107	0.135732261331161	53086405.5	240785347.5	53170950.5	cela1_red_18_52696738	cela1_red_18_53645163
LG4.b.791.20	Female	-1896.58318371325	-1895.42213737025	4	791	20	810	3497	240311135	52612193	52696738	3516	241259560	53560618	53645163	948425	2.32209268600127	0.127548328829363	53086405.5	240785347.5	53170950.5	cela1_red_18_52696738	cela1_red_18_53645163
LG4.b.801.20	Both	-2818.07020931273	-2817.49575103283	4	801	20	820	3507	240713031	53014089	53098634	3526	242084780	54385838	54470383	1371749	1.14891655979318	0.283776066465701	53699963.5	241398905.5	53784508.5	cela1_red_18_53098634	cela1_red_18_54470383
LG4.b.801.20	Male	-884.662474499511	-884.517602095771	4	801	20	820	3507	240713031	53014089	53098634	3526	242084780	54385838	54470383	1371749	0.289744807479792	0.590384110043688	53699963.5	241398905.5	53784508.5	cela1_red_18_53098634	cela1_red_18_54470383
LG4.b.801.20	Female	-1896.57334778607	-1896.19896571726	4	801	20	820	3507	240713031	53014089	53098634	3526	242084780	54385838	54470383	1371749	0.748764137627859	0.386867794396283	53699963.5	241398905.5	53784508.5	cela1_red_18_53098634	cela1_red_18_54470383
LG4.b.811.20	Both	-2818.06015745318	-2817.87097266291	4	811	20	830	3517	241424410	53725468	53810013	3536	242669064	54970122	55054667	1244654	0.378369580542312	0.538477103383338	54347795	242046737	54432340	cela1_red_18_53810013	cela1_red_18_55054667
LG4.b.811.20	Male	-884.66213369057	-884.565230163465	4	811	20	830	3517	241424410	53725468	53810013	3536	242669064	54970122	55054667	1244654	0.193807054208719	0.659766749061301	54347795	242046737	54432340	cela1_red_18_53810013	cela1_red_18_55054667
LG4.b.811.20	Female	-1896.56675038292	-1896.5617821673	4	811	20	830	3517	241424410	53725468	53810013	3536	242669064	54970122	55054667	1244654	0.00993643125502786	0.920597069516836	54347795	242046737	54432340	cela1_red_18_53810013	cela1_red_18_55054667
LG4.b.821.20	Both	-2818.07238609392	-2817.13324926643	4	821	20	840	3527	242113374	54414432	54498977	3546	243104085	55405143	55489688	990711	1.87827365498015	0.170530487889138	54909787.5	242608729.5	54994332.5	cela1_red_18_54498977	cela1_red_18_55489688
LG4.b.821.20	Male	-884.664290377877	-883.641511540912	4	821	20	840	3527	242113374	54414432	54498977	3546	243104085	55405143	55489688	990711	2.04555767393026	0.152651035786639	54909787.5	242608729.5	54994332.5	cela1_red_18_54498977	cela1_red_18_55489688
LG4.b.821.20	Female	-1896.57407854915	-1895.74364125577	4	821	20	840	3527	242113374	54414432	54498977	3546	243104085	55405143	55489688	990711	1.6608745867502	0.197485280283751	54909787.5	242608729.5	54994332.5	cela1_red_18_54498977	cela1_red_18_55489688
LG4.b.831.20	Both	-2818.07591768972	-2816.99518447828	4	831	20	850	3537	242698121	54999179	55083724	3556	243572179	55873237	55957782	874058	2.16146642287094	0.141509585274757	55436208	243135150	55520753	cela1_red_18_55083724	cela1_red_18_55957782
LG4.b.831.20	Male	-884.663269514753	-884.126409597494	4	831	20	850	3537	242698121	54999179	55083724	3556	243572179	55873237	55957782	874058	1.07371983451844	0.30010673238687	55436208	243135150	55520753	cela1_red_18_55083724	cela1_red_18_55957782
LG4.b.831.20	Female	-1896.58211112637	-1894.99157984928	4	831	20	850	3537	242698121	54999179	55083724	3556	243572179	55873237	55957782	874058	3.18106255418115	0.0744962715656987	55436208	243135150	55520753	cela1_red_18_55083724	cela1_red_18_55957782
LG4.b.841.20	Both	-2818.06059625952	-2818.01752868433	4	841	20	860	3547	243183924	55484982	55569527	3566	243948454	56249512	56334057	764530	0.0861351503726837	0.769149243104979	55867247	243566189	55951792	cela1_red_18_55569527	cela1_red_18_56334057
LG4.b.841.20	Male	-884.660284782405	-884.66028625227	4	841	20	860	3547	243183924	55484982	55569527	3566	243948454	56249512	56334057	764530	-2.93972993858915e-06	1	55867247	243566189	55951792	cela1_red_18_55569527	cela1_red_18_56334057
LG4.b.841.20	Female	-1896.57636175608	-1896.22805693644	4	841	20	860	3547	243183924	55484982	55569527	3566	243948454	56249512	56334057	764530	0.696609639285271	0.403925254946368	55867247	243566189	55951792	cela1_red_18_55569527	cela1_red_18_56334057
LG4.b.851.20	Both	-2818.06392572112	-2817.96305597955	4	851	20	870	3557	243592082	55893140	55977685	3576	244644193	56945251	57029796	1052111	0.20173948314914	0.653320433807651	56419195.5	244118137.5	56503740.5	cela1_red_18_55977685	cela1_red_18_57029796
LG4.b.851.20	Male	-884.660104496615	-884.660106206282	4	851	20	870	3557	243592082	55893140	55977685	3576	244644193	56945251	57029796	1052111	-3.41933400704875e-06	1	56419195.5	244118137.5	56503740.5	cela1_red_18_55977685	cela1_red_18_57029796
LG4.b.851.20	Female	-1896.57791015581	-1896.18857083241	4	851	20	870	3557	243592082	55893140	55977685	3576	244644193	56945251	57029796	1052111	0.778678646808658	0.37754556141402	56419195.5	244118137.5	56503740.5	cela1_red_18_55977685	cela1_red_18_57029796
LG4.b.861.20	Both	-2818.05585262514	-2818.05579776884	4	861	20	880	3567	244001120	56302178	56386723	3586	245283899	57584957	57669502	1282779	0.00010971260144288	0.991642808060008	56943567.5	244642509.5	57028112.5	cela1_red_18_56386723	cela1_red_18_57669502
LG4.b.861.20	Male	-884.659921223582	-884.659926186389	4	861	20	880	3567	244001120	56302178	56386723	3586	245283899	57584957	57669502	1282779	-9.9256144494575e-06	1	56943567.5	244642509.5	57028112.5	cela1_red_18_56386723	cela1_red_18_57669502
LG4.b.861.20	Female	-1896.571537997	-1896.42684220659	4	861	20	880	3567	244001120	56302178	56386723	3586	245283899	57584957	57669502	1282779	0.289391580824031	0.590610683587136	56943567.5	244642509.5	57028112.5	cela1_red_18_56386723	cela1_red_18_57669502
LG4.b.871.20	Both	-2818.05026425889	-2818.05026793111	4	871	20	890	3577	244687550	56988608	57073153	3596	245960606	58261664	58346209	1273056	-7.34442255634349e-06	1	57625136	245324078	57709681	cela1_red_18_57073153	cela1_red_18_58346209
LG4.b.871.20	Male	-884.659448757105	-884.659451065316	4	871	20	890	3577	244687550	56988608	57073153	3596	245960606	58261664	58346209	1273056	-4.61642321170075e-06	1	57625136	245324078	57709681	cela1_red_18_57073153	cela1_red_18_58346209
LG4.b.871.20	Female	-1896.56465718895	-1896.56465873365	4	871	20	890	3577	244687550	56988608	57073153	3596	245960606	58261664	58346209	1273056	-3.08940116156009e-06	1	57625136	245324078	57709681	cela1_red_18_57073153	cela1_red_18_58346209
LG4.b.881.20	Both	-2818.06153086639	-2817.94371799649	4	881	20	900	3587	245294053	57595111	57679656	3606	247031441	59332499	60428413	1737388	0.235625739802344	0.62738344239812	58463805	246162747	59054034.5	cela1_red_18_57679656	cela1_red_18_60428413
LG4.b.881.20	Male	-884.658690243083	-884.658693960077	4	881	20	900	3587	245294053	57595111	57679656	3606	247031441	59332499	60428413	1737388	-7.43398936720041e-06	1	58463805	246162747	59054034.5	cela1_red_18_57679656	cela1_red_18_60428413
LG4.b.881.20	Female	-1896.57093605248	-1896.42476977538	4	881	20	900	3587	245294053	57595111	57679656	3606	247031441	59332499	60428413	1737388	0.292332554199675	0.588729637589586	58463805	246162747	59054034.5	cela1_red_18_57679656	cela1_red_18_60428413
LG4.b.891.20	Both	-2818.05947395396	-2818.02796355286	4	891	20	910	3597	246217361	58518419	58602964	3616	249052732	61353790	62449704	2835371	0.0630208022057559	0.801783613871721	59936104.5	247635046.5	60526334	cela1_red_18_58602964	cela1_red_18_62449704
LG4.b.891.20	Male	-884.659589907602	-884.65959260314	4	891	20	910	3597	246217361	58518419	58602964	3616	249052732	61353790	62449704	2835371	-5.39107577424147e-06	1	59936104.5	247635046.5	60526334	cela1_red_18_58602964	cela1_red_18_62449704
LG4.b.891.20	Female	-1896.57019489434	-1896.48566892563	4	891	20	910	3597	246217361	58518419	58602964	3616	249052732	61353790	62449704	2835371	0.169051937426957	0.680955758870905	59936104.5	247635046.5	60526334	cela1_red_18_58602964	cela1_red_18_62449704
LG4.b.901.20	Both	-2818.05104358968	-2818.05104761693	4	901	20	920	3607	247140661	59441719	60537633	3626	249545226	61846284	62942198	2404565	-8.05450599727919e-06	1	60644001.5	248342943.5	61739915.5	cela1_red_18_60537633	cela1_red_18_62942198
LG4.b.901.20	Male	-884.659548545922	-884.659551358232	4	901	20	920	3607	247140661	59441719	60537633	3626	249545226	61846284	62942198	2404565	-5.62461991648888e-06	1	60644001.5	248342943.5	61739915.5	cela1_red_18_60537633	cela1_red_18_62942198
LG4.b.901.20	Female	-1896.56656589609	-1896.56656876729	4	901	20	920	3607	247140661	59441719	60537633	3626	249545226	61846284	62942198	2404565	-5.74239220441086e-06	1	60644001.5	248342943.5	61739915.5	cela1_red_18_60537633	cela1_red_18_62942198
LG4.b.905.20	Both	-2818.04835561523	-2818.0483619155	4	905	20	924	3611	248896804	61197862	62293776	3630	249787724	62088782	63184696	890920	-1.26005352285574e-05	1	61643322	249342264	62739236	cela1_red_18_62293776	cela1_sika_18_63184696
LG4.b.905.20	Male	-884.659568067269	-884.659570881714	4	905	20	924	3611	248896804	61197862	62293776	3630	249787724	62088782	63184696	890920	-5.62888953936636e-06	1	61643322	249342264	62739236	cela1_red_18_62293776	cela1_sika_18_63184696
LG4.b.905.20	Female	-1896.56466102422	-1896.56466299399	4	905	20	924	3611	248896804	61197862	62293776	3630	249787724	62088782	63184696	890920	-3.93954405808472e-06	1	61643322	249342264	62739236	cela1_red_18_62293776	cela1_sika_18_63184696
LG5.b.1.20	Both	-2818.04132488482	-2818.04133656927	5	1	20	20	3678	252893857	1033920	74880420	3697	254616673	2756736	73157604	1722816	-2.33689106607926e-05	1	1895328	253755265	74019012	cela1_red_17_74880420	cela1_red_17_73157604
LG5.b.1.20	Male	-884.660517116245	-884.66051826585	5	1	20	20	3678	252893857	1033920	74880420	3697	254616673	2756736	73157604	1722816	-2.29921124628163e-06	1	1895328	253755265	74019012	cela1_red_17_74880420	cela1_red_17_73157604
LG5.b.1.20	Female	-1896.55824563149	-1896.55825384504	5	1	20	20	3678	252893857	1033920	74880420	3697	254616673	2756736	73157604	1722816	-1.64270845743886e-05	1	1895328	253755265	74019012	cela1_red_17_74880420	cela1_red_17_73157604
LG5.b.11.20	Both	-2818.04794708738	-2818.04795332031	5	11	20	30	3688	253566598	1706661	74207679	3707	255138140	3278203	72636137	1571542	-1.24658627100871e-05	1	2492432	254352369	73421908	cela1_red_17_74207679	cela1_red_17_72636137
LG5.b.11.20	Male	-884.660298531516	-884.660300023334	5	11	20	30	3688	253566598	1706661	74207679	3707	255138140	3278203	72636137	1571542	-2.98363556794357e-06	1	2492432	254352369	73421908	cela1_red_17_74207679	cela1_red_17_72636137
LG5.b.11.20	Female	-1896.56230295259	-1896.5623070998	5	11	20	30	3688	253566598	1706661	74207679	3707	255138140	3278203	72636137	1571542	-8.29441569294431e-06	1	2492432	254352369	73421908	cela1_red_17_74207679	cela1_red_17_72636137
LG5.b.21.20	Both	-2818.05443801301	-2818.05443929193	5	21	20	40	3698	254900059	3040122	72874218	3717	255570134	3710197	72204143	670075	-2.55784107139334e-06	1	3375159.5	255235096.5	72539180.5	cela1_red_17_72874218	cela1_red_17_72204143
LG5.b.21.20	Male	-884.660454529067	-884.66045504208	5	21	20	40	3698	254900059	3040122	72874218	3717	255570134	3710197	72204143	670075	-1.02602575680066e-06	1	3375159.5	255235096.5	72539180.5	cela1_red_17_72874218	cela1_red_17_72204143
LG5.b.21.20	Female	-1896.56898031148	-1896.52616431776	5	21	20	40	3698	254900059	3040122	72874218	3717	255570134	3710197	72204143	670075	0.0856319874465044	0.769805410689499	3375159.5	255235096.5	72539180.5	cela1_red_17_72874218	cela1_red_17_72204143
LG5.b.31.20	Both	-2818.05038356722	-2818.05038764094	5	31	20	50	3708	255196899	3336962	72577378	3727	256167375	4307438	71606902	970476	-8.14743179944344e-06	1	3822200	255682137	72092140	cela1_red_17_72577378	cela1_red_17_71606902
LG5.b.31.20	Male	-884.661452787135	-884.654313884087	5	31	20	50	3708	255196899	3336962	72577378	3727	256167375	4307438	71606902	970476	0.0142778060953788	0.90488734114331	3822200	255682137	72092140	cela1_red_17_72577378	cela1_red_17_71606902
LG5.b.31.20	Female	-1896.56671926988	-1896.56672093551	5	31	20	50	3708	255196899	3336962	72577378	3727	256167375	4307438	71606902	970476	-3.33125990437111e-06	1	3822200	255682137	72092140	cela1_red_17_72577378	cela1_red_17_71606902
LG5.b.41.20	Both	-2818.06112181751	-2818.01376023044	5	41	20	60	3718	255617739	3757802	72156538	3737	256759264	4899327	71015013	1141525	0.0947231741365613	0.758256360237152	4328564.5	256188501.5	71585775.5	cela1_red_17_72156538	cela1_red_17_71015013
LG5.b.41.20	Male	-884.661284381175	-884.661261261813	5	41	20	60	3718	255617739	3757802	72156538	3737	256759264	4899327	71015013	1141525	4.62387245079299e-05	0.994574501628989	4328564.5	256188501.5	71585775.5	cela1_red_17_72156538	cela1_red_17_71015013
LG5.b.41.20	Female	-1896.56926834215	-1896.53407020043	5	41	20	60	3718	255617739	3757802	72156538	3737	256759264	4899327	71015013	1141525	0.0703962834272716	0.790760663633286	4328564.5	256188501.5	71585775.5	cela1_red_17_72156538	cela1_red_17_71015013
LG5.b.51.20	Both	-2818.06719879051	-2817.88433260704	5	51	20	70	3728	256248330	4388393	71525947	3747	257206623	5346686	70567654	958293	0.365732366931297	0.545339733520992	4867539.5	256727476.5	71046800.5	cela1_red_17_71525947	cela1_red_17_70567654
LG5.b.51.20	Male	-884.660480935498	-884.660482176638	5	51	20	70	3728	256248330	4388393	71525947	3747	257206623	5346686	70567654	958293	-2.48228002419637e-06	1	4867539.5	256727476.5	71046800.5	cela1_red_17_71525947	cela1_red_17_70567654
LG5.b.51.20	Female	-1896.57357616785	-1896.40047533177	5	51	20	70	3728	256248330	4388393	71525947	3747	257206623	5346686	70567654	958293	0.346201672170537	0.556271187003774	4867539.5	256727476.5	71046800.5	cela1_red_17_71525947	cela1_red_17_70567654
LG5.b.61.20	Both	-2818.05812023404	-2818.04596537763	5	61	20	80	3738	256824946	4965009	70949331	3757	258332901	6472964	69441376	1507955	0.0243097128150112	0.876099451371458	5718986.5	257578923.5	70195353.5	cela1_red_17_70949331	cela1_red_17_69441376
LG5.b.61.20	Male	-884.660027121236	-884.660028672727	5	61	20	80	3738	256824946	4965009	70949331	3757	258332901	6472964	69441376	1507955	-3.10298128169961e-06	1	5718986.5	257578923.5	70195353.5	cela1_red_17_70949331	cela1_red_17_69441376
LG5.b.61.20	Female	-1896.57102008006	-1896.48039458078	5	61	20	80	3738	256824946	4965009	70949331	3757	258332901	6472964	69441376	1507955	0.181250998553878	0.670300349173589	5718986.5	257578923.5	70195353.5	cela1_red_17_70949331	cela1_red_17_69441376
LG5.b.71.20	Both	-2818.05934544472	-2818.02355793187	5	71	20	90	3748	257284082	5424145	70490195	3767	259230111	7370174	68544166	1946029	0.0715750256995307	0.789057198631106	6397159.5	258257096.5	69517180.5	cela1_red_17_70490195	cela1_red_17_68544166
LG5.b.71.20	Male	-884.659076215282	-884.659078921435	5	71	20	90	3748	257284082	5424145	70490195	3767	259230111	7370174	68544166	1946029	-5.41230679118598e-06	1	6397159.5	258257096.5	69517180.5	cela1_red_17_70490195	cela1_red_17_68544166
LG5.b.71.20	Female	-1896.56978903845	-1896.51357463006	5	71	20	90	3748	257284082	5424145	70490195	3767	259230111	7370174	68544166	1946029	0.112428816777538	0.737395726754241	6397159.5	258257096.5	69517180.5	cela1_red_17_70490195	cela1_red_17_68544166
LG5.b.81.20	Both	-2818.06198197046	-2817.97283007203	5	81	20	100	3758	258339383	6479446	69434894	3777	259778456	7918519	67995821	1439073	0.178303796859836	0.672835001154447	7198982.5	259058919.5	68715357.5	cela1_red_17_69434894	cela1_red_17_67995821
LG5.b.81.20	Male	-884.659517101507	-884.659519479468	5	81	20	100	3758	258339383	6479446	69434894	3777	259778456	7918519	67995821	1439073	-4.75592059956398e-06	1	7198982.5	259058919.5	68715357.5	cela1_red_17_69434894	cela1_red_17_67995821
LG5.b.81.20	Female	-1896.57298425072	-1896.39539577807	5	81	20	100	3758	258339383	6479446	69434894	3777	259778456	7918519	67995821	1439073	0.355176945301992	0.551197115374479	7198982.5	259058919.5	68715357.5	cela1_red_17_69434894	cela1_red_17_67995821
LG5.b.91.20	Both	-2818.0547576874	-2818.05476055081	5	91	20	110	3768	259276719	7416782	68497558	3787	260549879	8689942	67224398	1273160	-5.72682529309532e-06	1	8053362	259913299	67860978	cela1_red_17_68497558	cela1_red_17_67224398
LG5.b.91.20	Male	-884.660620953481	-884.660621799511	5	91	20	110	3768	259276719	7416782	68497558	3787	260549879	8689942	67224398	1273160	-1.6920614598348e-06	1	8053362	259913299	67860978	cela1_red_17_68497558	cela1_red_17_67224398
LG5.b.91.20	Female	-1896.57161433056	-1896.43126245688	5	91	20	110	3768	259276719	7416782	68497558	3787	260549879	8689942	67224398	1273160	0.280703747358984	0.596240326416305	8053362	259913299	67860978	cela1_red_17_68497558	cela1_red_17_67224398
LG5.b.101.20	Both	-2818.06128380134	-2817.95083769001	5	101	20	120	3778	259891305	8031368	67882972	3797	261097147	9237210	66677130	1205842	0.220892222670955	0.638360928817779	8634289	260494226	67280051	cela1_red_17_67882972	cela1_red_17_66677130
LG5.b.101.20	Male	-884.660554309651	-884.660555199975	5	101	20	120	3778	259891305	8031368	67882972	3797	261097147	9237210	66677130	1205842	-1.78064829015057e-06	1	8634289	260494226	67280051	cela1_red_17_67882972	cela1_red_17_66677130
LG5.b.101.20	Female	-1896.57432639118	-1896.19898209565	5	101	20	120	3778	259891305	8031368	67882972	3797	261097147	9237210	66677130	1205842	0.750688591065227	0.386258306309367	8634289	260494226	67280051	cela1_red_17_67882972	cela1_red_17_66677130
LG5.b.111.20	Both	-2818.06043854223	-2817.93148364647	5	111	20	130	3788	260630398	8770461	67143879	3807	261832189	9972252	65942088	1201791	0.25790979152498	0.611559806126753	9371356.5	261231293.5	66542983.5	cela1_red_17_67143879	cela1_red_17_65942088
LG5.b.111.20	Male	-884.6593819577	-884.659384630278	5	111	20	130	3788	260630398	8770461	67143879	3807	261832189	9972252	65942088	1201791	-5.34515606886998e-06	1	9371356.5	261231293.5	66542983.5	cela1_red_17_67143879	cela1_red_17_65942088
LG5.b.111.20	Female	-1896.57214911834	-1896.22923600884	5	111	20	130	3788	260630398	8770461	67143879	3807	261832189	9972252	65942088	1201791	0.685826218985312	0.407587676966073	9371356.5	261231293.5	66542983.5	cela1_red_17_67143879	cela1_red_17_65942088
LG5.b.121.20	Both	-2818.04989968133	-2818.04991840097	5	121	20	140	3798	261137675	9277738	66636602	3817	262558044	10698107	65216233	1420369	-3.74392930098111e-05	1	9987922.5	261847859.5	65926417.5	cela1_red_17_66636602	cela1_red_17_65216233
LG5.b.121.20	Male	-884.658544447931	-884.658548748104	5	121	20	140	3798	261137675	9277738	66636602	3817	262558044	10698107	65216233	1420369	-8.60034606375848e-06	1	9987922.5	261847859.5	65926417.5	cela1_red_17_66636602	cela1_red_17_65216233
LG5.b.121.20	Female	-1896.56247773981	-1896.56249293692	5	121	20	140	3798	261137675	9277738	66636602	3817	262558044	10698107	65216233	1420369	-3.03942183563777e-05	1	9987922.5	261847859.5	65926417.5	cela1_red_17_66636602	cela1_red_17_65216233
LG5.b.131.20	Both	-2818.04760766784	-2818.04762527569	5	131	20	150	3808	261981623	10121686	65792654	3827	263272369	11412432	64501908	1290746	-3.52157030647504e-05	1	10767059	262626996	65147281	cela1_red_17_65792654	cela1_red_17_64501908
LG5.b.131.20	Male	-884.659814024336	-884.659816149711	5	131	20	150	3808	261981623	10121686	65792654	3827	263272369	11412432	64501908	1290746	-4.25074972554285e-06	1	10767059	262626996	65147281	cela1_red_17_65792654	cela1_red_17_64501908
LG5.b.131.20	Female	-1896.56092246933	-1896.56092789098	5	131	20	150	3808	261981623	10121686	65792654	3827	263272369	11412432	64501908	1290746	-1.08432918750623e-05	1	10767059	262626996	65147281	cela1_red_17_65792654	cela1_red_17_64501908
LG5.b.141.20	Both	-2818.05363801037	-2818.05363982436	5	141	20	160	3818	262657652	10797715	65116625	3837	264195044	12335107	63579233	1537392	-3.62798164132982e-06	1	11566411	263426348	64347929	cela1_red_17_65116625	cela1_red_17_63579233
LG5.b.141.20	Male	-884.662973527368	-884.402899968569	5	141	20	160	3818	262657652	10797715	65116625	3837	264195044	12335107	63579233	1537392	0.520147117599208	0.470778932562681	11566411	263426348	64347929	cela1_red_17_65116625	cela1_red_17_63579233
LG5.b.141.20	Female	-1896.56199780968	-1896.56200186322	5	141	20	160	3818	262657652	10797715	65116625	3837	264195044	12335107	63579233	1537392	-8.10708434073604e-06	1	11566411	263426348	64347929	cela1_red_17_65116625	cela1_red_17_63579233
LG5.b.151.20	Both	-2818.08238986691	-2816.67583778996	5	151	20	170	3828	263340398	11480461	64433879	3847	264611917	12751980	63162360	1271519	2.81310415389908	0.0934973002706141	12116220.5	263976157.5	63798119.5	cela1_red_17_64433879	cela1_red_17_63162360
LG5.b.151.20	Male	-884.667200974014	-882.029887055767	5	151	20	170	3828	263340398	11480461	64433879	3847	264611917	12751980	63162360	1271519	5.27462783649389	0.0216384130977588	12116220.5	263976157.5	63798119.5	cela1_red_17_64433879	cela1_red_17_63162360
LG5.b.151.20	Female	-1896.57362278513	-1896.20239408821	5	151	20	170	3828	263340398	11480461	64433879	3847	264611917	12751980	63162360	1271519	0.74245739385151	0.388874822626048	12116220.5	263976157.5	63798119.5	cela1_red_17_64433879	cela1_red_17_63162360
LG5.b.161.20	Both	-2818.07956509495	-2816.90433814437	5	161	20	180	3838	264209996	12350059	63564281	3857	265294789	13434852	62479488	1084793	2.35045390117102	0.12524653441145	12892455.5	264752392.5	63021884.5	cela1_red_17_63564281	cela1_red_17_62479488
LG5.b.161.20	Male	-884.667405164774	-881.369839401895	5	161	20	180	3838	264209996	12350059	63564281	3857	265294789	13434852	62479488	1084793	6.59513152575687	0.0102258001586044	12892455.5	264752392.5	63021884.5	cela1_red_17_63564281	cela1_red_17_62479488
LG5.b.161.20	Female	-1896.57314117595	-1896.31829191362	5	161	20	180	3838	264209996	12350059	63564281	3857	265294789	13434852	62479488	1084793	0.509698524656415	0.475269391576021	12892455.5	264752392.5	63021884.5	cela1_red_17_63564281	cela1_red_17_62479488
LG5.b.171.20	Both	-2818.06330840689	-2817.85040178793	5	171	20	190	3848	264724640	12864703	63049637	3867	265877211	14017274	61897066	1152571	0.425813237930015	0.514050512387055	13440988.5	265300925.5	62473351.5	cela1_red_17_63049637	cela1_red_17_61897066
LG5.b.171.20	Male	-884.667317113448	-881.982294874353	5	171	20	190	3848	264724640	12864703	63049637	3867	265877211	14017274	61897066	1152571	5.37004447818936	0.0204854551814863	13440988.5	265300925.5	62473351.5	cela1_red_17_63049637	cela1_red_17_61897066
LG5.b.171.20	Female	-1896.56349748156	-1896.56349975263	5	171	20	190	3848	264724640	12864703	63049637	3867	265877211	14017274	61897066	1152571	-4.54213477496523e-06	1	13440988.5	265300925.5	62473351.5	cela1_red_17_63049637	cela1_red_17_61897066
LG5.b.181.20	Both	-2818.07026785842	-2817.4149627512	5	181	20	200	3858	265368495	13508558	62405782	3877	266373026	14513089	61401251	1004531	1.31061021444566	0.252284202439729	14010823.5	265870760.5	61903516.5	cela1_red_17_62405782	cela1_red_17_61401251
LG5.b.181.20	Male	-884.667870813331	-881.71777064826	5	181	20	200	3858	265368495	13508558	62405782	3877	266373026	14513089	61401251	1004531	5.90020033014139	0.0151391627712012	14010823.5	265870760.5	61903516.5	cela1_red_17_62405782	cela1_red_17_61401251
LG5.b.181.20	Female	-1896.56675112817	-1896.561538035	5	181	20	200	3858	265368495	13508558	62405782	3877	266373026	14513089	61401251	1004531	0.0104261863434658	0.918670396567897	14010823.5	265870760.5	61903516.5	cela1_red_17_62405782	cela1_red_17_61401251
LG5.b.191.20	Both	-2818.0655972515	-2817.70071253564	5	191	20	210	3868	265889809	14029872	61884468	3887	266877097	15017160	60897180	987288	0.729769431711247	0.392957934852912	14523516	266383453	61390824	cela1_red_17_61884468	cela1_red_17_60897180
LG5.b.191.20	Male	-884.663819757274	-883.227442233167	5	191	20	210	3868	265889809	14029872	61884468	3887	266877097	15017160	60897180	987288	2.87275504821355	0.0900905284221307	14523516	266383453	61390824	cela1_red_17_61884468	cela1_red_17_60897180
LG5.b.191.20	Female	-1896.56897453882	-1896.46554880792	5	191	20	210	3868	265889809	14029872	61884468	3887	266877097	15017160	60897180	987288	0.206851461799943	0.649246468731681	14523516	266383453	61390824	cela1_red_17_61884468	cela1_red_17_60897180
LG5.b.201.20	Both	-2818.07095187942	-2817.47272640908	5	201	20	220	3878	266412464	14552527	61361813	3897	267572120	15712183	60202157	1159656	1.19645094067528	0.274032176468486	15132355	266992292	60781985	cela1_red_17_61361813	cela1_red_17_60202157
LG5.b.201.20	Male	-884.664863035469	-882.862788808815	5	201	20	220	3878	266412464	14552527	61361813	3897	267572120	15712183	60202157	1159656	3.6041484533082	0.0576355787130215	15132355	266992292	60781985	cela1_red_17_61361813	cela1_red_17_60202157
LG5.b.201.20	Female	-1896.57179482297	-1896.34443495132	5	201	20	220	3878	266412464	14552527	61361813	3897	267572120	15712183	60202157	1159656	0.454719743302576	0.500102103406238	15132355	266992292	60781985	cela1_red_17_61361813	cela1_red_17_60202157
LG5.b.211.20	Both	-2818.06649113018	-2817.65257518476	5	211	20	230	3888	266936435	15076498	60837842	3907	268264016	16404079	59510261	1327581	0.827831890854213	0.362900210485044	15740288.5	267600225.5	60174051.5	cela1_red_17_60837842	cela1_red_17_59510261
LG5.b.211.20	Male	-884.665352873835	-882.534938686017	5	211	20	230	3888	266936435	15076498	60837842	3907	268264016	16404079	59510261	1327581	4.2608283756349	0.0390008986349241	15740288.5	267600225.5	60174051.5	cela1_red_17_60837842	cela1_red_17_59510261
LG5.b.211.20	Female	-1896.56845501123	-1896.51690331718	5	211	20	230	3888	266936435	15076498	60837842	3907	268264016	16404079	59510261	1327581	0.103103388086311	0.748136760169742	15740288.5	267600225.5	60174051.5	cela1_red_17_60837842	cela1_red_17_59510261
LG5.b.221.20	Both	-2818.06392370734	-2817.92269239167	5	221	20	240	3898	267606598	15746661	60167679	3917	269215888	17355951	58558389	1609290	0.282462631332237	0.595091645182589	16551306	268411243	59363034	cela1_red_17_60167679	cela1_red_17_58558389
LG5.b.221.20	Male	-884.661090466175	-884.661090687119	5	221	20	240	3898	267606598	15746661	60167679	3917	269215888	17355951	58558389	1609290	-4.41888687419123e-07	1	16551306	268411243	59363034	cela1_red_17_60167679	cela1_red_17_58558389
LG5.b.221.20	Female	-1896.56852866279	-1896.5460732108	5	221	20	240	3898	267606598	15746661	60167679	3917	269215888	17355951	58558389	1609290	0.0449109039641371	0.832167942314903	16551306	268411243	59363034	cela1_red_17_60167679	cela1_red_17_58558389
LG5.b.231.20	Both	-2818.0807723513	-2817.55152747595	5	231	20	250	3908	268522373	16662436	59251904	3927	269808818	17948881	57965459	1286445	1.05848975070785	0.303559890662078	17305658.5	269165595.5	58608681.5	cela1_red_17_59251904	cela1_red_17_57965459
LG5.b.231.20	Male	-884.661524646222	-884.657704166546	5	231	20	250	3908	268522373	16662436	59251904	3927	269808818	17948881	57965459	1286445	0.00764095935278419	0.930343569304	17305658.5	269165595.5	58608681.5	cela1_red_17_59251904	cela1_red_17_57965459
LG5.b.231.20	Female	-1896.57381217645	-1896.44207849578	5	231	20	250	3908	268522373	16662436	59251904	3927	269808818	17948881	57965459	1286445	0.26346736134974	0.607747975733544	17305658.5	269165595.5	58608681.5	cela1_red_17_59251904	cela1_red_17_57965459
LG5.b.241.20	Both	-2818.07380612302	-2817.68465974841	5	241	20	260	3918	269314378	17454441	58459899	3937	270206283	18346346	57567994	891905	0.778292749225329	0.377663786813397	17900393.5	269760330.5	58013946.5	cela1_red_17_58459899	cela1_red_17_57567994
LG5.b.241.20	Male	-884.66177445791	-884.645529804236	5	241	20	260	3918	269314378	17454441	58459899	3937	270206283	18346346	57567994	891905	0.0324893073475323	0.856957951310371	17900393.5	269760330.5	58013946.5	cela1_red_17_58459899	cela1_red_17_57567994
LG5.b.241.20	Female	-1896.57114708045	-1896.4815018796	5	241	20	260	3918	269314378	17454441	58459899	3937	270206283	18346346	57567994	891905	0.179290401685194	0.6719837685757	17900393.5	269760330.5	58013946.5	cela1_red_17_58459899	cela1_red_17_57567994
LG5.b.251.20	Both	-2818.06208067201	-2817.95224578267	5	251	20	270	3928	269902185	18042248	57872092	3947	270680671	18820734	57093606	778486	0.219669778665775	0.639291645707603	18431491	270291428	57482849	cela1_red_17_57872092	cela1_red_17_57093606
LG5.b.251.20	Male	-884.660938513846	-884.660938911156	5	251	20	270	3928	269902185	18042248	57872092	3947	270680671	18820734	57093606	778486	-7.94621428212849e-07	1	18431491	270291428	57482849	cela1_red_17_57872092	cela1_red_17_57093606
LG5.b.251.20	Female	-1896.56846671451	-1896.53629115102	5	251	20	270	3928	269902185	18042248	57872092	3947	270680671	18820734	57093606	778486	0.0643511269886403	0.799746464698116	18431491	270291428	57482849	cela1_red_17_57872092	cela1_red_17_57093606
LG5.b.261.20	Both	-2818.05901852508	-2818.01735456556	5	261	20	280	3938	270237887	18377950	57536390	3957	271264880	19404943	56509397	1026993	0.0833279190374014	0.772837169878973	18891446.5	270751383.5	57022893.5	cela1_red_17_57536390	cela1_red_17_56509397
LG5.b.261.20	Male	-884.662375582022	-884.482569755648	5	261	20	280	3938	270237887	18377950	57536390	3957	271264880	19404943	56509397	1026993	0.359611652749663	0.548721992742334	18891446.5	270751383.5	57022893.5	cela1_red_17_57536390	cela1_red_17_56509397
LG5.b.261.20	Female	-1896.56668210822	-1896.5664778472	5	261	20	280	3938	270237887	18377950	57536390	3957	271264880	19404943	56509397	1026993	0.000408522037560033	0.983874312581409	18891446.5	270751383.5	57022893.5	cela1_red_17_57536390	cela1_red_17_56509397
LG5.b.271.20	Both	-2818.06683693315	-2817.65409765536	5	271	20	290	3948	270710974	18851037	57063303	3967	271846444	19986507	55927833	1135470	0.825478555586415	0.363583218746457	19418772	271278709	56495568	cela1_red_17_57063303	cela1_red_17_55927833
LG5.b.271.20	Male	-884.664319914061	-883.96920248619	5	271	20	290	3948	270710974	18851037	57063303	3967	271846444	19986507	55927833	1135470	1.39023485574216	0.238365442127873	19418772	271278709	56495568	cela1_red_17_57063303	cela1_red_17_55927833
LG5.b.271.20	Female	-1896.57180557728	-1896.10328010968	5	271	20	290	3948	270710974	18851037	57063303	3967	271846444	19986507	55927833	1135470	0.937050935212937	0.333037421426919	19418772	271278709	56495568	cela1_red_17_57063303	cela1_red_17_55927833
LG5.b.281.20	Both	-2818.0648213054	-2817.66530066752	5	281	20	300	3958	271373786	19513849	56400491	3977	272640887	20780950	55133390	1267101	0.799041275752643	0.37138016696332	20147399.5	272007336.5	55766940.5	cela1_red_17_56400491	cela1_red_17_55133390
LG5.b.281.20	Male	-884.662872836251	-884.277004245207	5	281	20	300	3958	271373786	19513849	56400491	3977	272640887	20780950	55133390	1267101	0.771737182087463	0.379680177099514	20147399.5	272007336.5	55766940.5	cela1_red_17_56400491	cela1_red_17_55133390
LG5.b.281.20	Female	-1896.57000064313	-1896.41361674941	5	281	20	300	3958	271373786	19513849	56400491	3977	272640887	20780950	55133390	1267101	0.312767787435405	0.575986706000069	20147399.5	272007336.5	55766940.5	cela1_red_17_56400491	cela1_red_17_55133390
LG5.b.291.20	Both	-2818.05692862823	-2818.04613748242	5	291	20	310	3968	271920396	20060459	55853881	3987	272978654	21118717	54795623	1058258	0.0215822916188699	0.883203747725452	20589588	272449525	55324752	cela1_red_17_55853881	cela1_red_17_54795623
LG5.b.291.20	Male	-884.660485024893	-884.660486116176	5	291	20	310	3968	271920396	20060459	55853881	3987	272978654	21118717	54795623	1058258	-2.18256582229515e-06	1	20589588	272449525	55324752	cela1_red_17_55853881	cela1_red_17_54795623
LG5.b.291.20	Female	-1896.56320151583	-1896.5632043602	5	291	20	310	3968	271920396	20060459	55853881	3987	272978654	21118717	54795623	1058258	-5.6887538448791e-06	1	20589588	272449525	55324752	cela1_red_17_55853881	cela1_red_17_54795623
LG5.b.301.20	Both	-2818.06055300768	-2817.96335535612	5	301	20	320	3978	272656545	20796608	55117732	3997	273574908	21714971	54199369	918363	0.194395303119563	0.659283346754881	21255789.5	273115726.5	54658550.5	cela1_red_17_55117732	cela1_red_17_54199369
LG5.b.301.20	Male	-884.660238771615	-884.660240152447	5	301	20	320	3978	272656545	20796608	55117732	3997	273574908	21714971	54199369	918363	-2.76166406365519e-06	1	21255789.5	273115726.5	54658550.5	cela1_red_17_55117732	cela1_red_17_54199369
LG5.b.301.20	Female	-1896.56753584726	-1896.559358458	5	301	20	320	3978	272656545	20796608	55117732	3997	273574908	21714971	54199369	918363	0.0163547785232367	0.898239346616646	21255789.5	273115726.5	54658550.5	cela1_red_17_55117732	cela1_red_17_54199369
LG5.b.311.20	Both	-2818.05549692884	-2818.05549729035	5	311	20	330	3988	273017495	21157558	54756782	4007	274165722	22305785	53608555	1148227	-7.2302373155253e-07	1	21731671.5	273591608.5	54182668.5	cela1_red_17_54756782	cela1_red_17_53608555
LG5.b.311.20	Male	-884.6602699913	-884.660271372122	5	311	20	330	3988	273017495	21157558	54756782	4007	274165722	22305785	53608555	1148227	-2.76164519164013e-06	1	21731671.5	273591608.5	54182668.5	cela1_red_17_54756782	cela1_red_17_53608555
LG5.b.311.20	Female	-1896.5673627148	-1896.5626276473	5	311	20	330	3988	273017495	21157558	54756782	4007	274165722	22305785	53608555	1148227	0.00947013500035609	0.922476547108468	21731671.5	273591608.5	54182668.5	cela1_red_17_54756782	cela1_red_17_53608555
LG5.b.321.20	Both	-2818.04977552448	-2818.04978879503	5	321	20	340	3998	273646616	21786679	54127661	4017	274732007	22872070	53042270	1085391	-2.65410963038448e-05	1	22329374.5	274189311.5	53584965.5	cela1_red_17_54127661	cela1_red_17_53042270
LG5.b.321.20	Male	-884.65906819236	-884.659071634394	5	321	20	340	3998	273646616	21786679	54127661	4017	274732007	22872070	53042270	1085391	-6.88406680637854e-06	1	22329374.5	274189311.5	53584965.5	cela1_red_17_54127661	cela1_red_17_53042270
LG5.b.321.20	Female	-1896.56312094881	-1896.56312429712	5	321	20	340	3998	273646616	21786679	54127661	4017	274732007	22872070	53042270	1085391	-6.69660994390142e-06	1	22329374.5	274189311.5	53584965.5	cela1_red_17_54127661	cela1_red_17_53042270
LG5.b.331.20	Both	-2818.05320782561	-2818.05321019611	5	331	20	350	4008	274225160	22365223	53549117	4027	275531177	23671240	52243100	1306017	-4.74099761049729e-06	1	23018231.5	274878168.5	52896108.5	cela1_red_17_53549117	cela1_red_17_52243100
LG5.b.331.20	Male	-884.658782594039	-884.658786786439	5	331	20	350	4008	274225160	22365223	53549117	4027	275531177	23671240	52243100	1306017	-8.38479968479078e-06	1	23018231.5	274878168.5	52896108.5	cela1_red_17_53549117	cela1_red_17_52243100
LG5.b.331.20	Female	-1896.56426267393	-1896.56426509739	5	331	20	350	4008	274225160	22365223	53549117	4027	275531177	23671240	52243100	1306017	-4.84692054669722e-06	1	23018231.5	274878168.5	52896108.5	cela1_red_17_53549117	cela1_red_17_52243100
LG5.b.341.20	Both	-2818.07716621252	-2816.78761516839	5	341	20	360	4018	274836049	22976112	52938228	4037	276632707	24772770	51141570	1796658	2.57910208826343	0.108283070670859	23874441	275734378	52039899	cela1_red_17_52938228	cela1_red_17_51141570
LG5.b.341.20	Male	-884.660591127514	-884.660592102263	5	341	20	360	4018	274836049	22976112	52938228	4037	276632707	24772770	51141570	1796658	-1.94949893739249e-06	1	23874441	275734378	52039899	cela1_red_17_52938228	cela1_red_17_51141570
LG5.b.341.20	Female	-1896.57593413209	-1895.93152357147	5	341	20	360	4018	274836049	22976112	52938228	4037	276632707	24772770	51141570	1796658	1.28882112122665	0.256265316693334	23874441	275734378	52039899	cela1_red_17_52938228	cela1_red_17_51141570
LG5.b.351.20	Both	-2818.07036805212	-2817.33436878876	5	351	20	370	4028	275531252	23671315	52243025	4047	277371789	25511852	50402488	1840537	1.47199852673475	0.225030635756124	24591583.5	276451520.5	51322756.5	cela1_red_17_52243025	cela1_red_17_50402488
LG5.b.351.20	Male	-884.661201583052	-884.663854199078	5	351	20	370	4028	275531252	23671315	52243025	4047	277371789	25511852	50402488	1840537	-0.00530523205316058	1	24591583.5	276451520.5	51322756.5	cela1_red_17_52243025	cela1_red_17_50402488
LG5.b.351.20	Female	-1896.57294853497	-1896.27739537872	5	351	20	370	4028	275531252	23671315	52243025	4047	277371789	25511852	50402488	1840537	0.591106312487682	0.441991633140938	24591583.5	276451520.5	51322756.5	cela1_red_17_52243025	cela1_red_17_50402488
LG5.b.361.20	Both	-2818.05283694935	-2818.05283918823	5	361	20	380	4038	276702628	24842691	51071649	4057	278132376	26272439	49641901	1429748	-4.47775437351083e-06	1	25557565	277417502	50356775	cela1_red_17_51071649	cela1_red_17_49641901
LG5.b.361.20	Male	-884.662287697925	-884.28865817443	5	361	20	380	4038	276702628	24842691	51071649	4057	278132376	26272439	49641901	1429748	0.747259046989029	0.387345422634727	25557565	277417502	50356775	cela1_red_17_51071649	cela1_red_17_49641901
LG5.b.361.20	Female	-1896.56146202747	-1896.56146650115	5	361	20	380	4038	276702628	24842691	51071649	4057	278132376	26272439	49641901	1429748	-8.94735512702027e-06	1	25557565	277417502	50356775	cela1_red_17_51071649	cela1_red_17_49641901
LG5.b.371.20	Both	-2818.0601556139	-2817.89649719457	5	371	20	390	4048	277403279	25543342	50370998	4067	278688008	26828071	49086269	1284729	0.327316838668594	0.567243318454887	26185706.5	278045643.5	49728633.5	cela1_red_17_50370998	cela1_red_17_49086269
LG5.b.371.20	Male	-884.663243560732	-884.04389584287	5	371	20	390	4048	277403279	25543342	50370998	4067	278688008	26828071	49086269	1284729	1.23869543572437	0.265722623365708	26185706.5	278045643.5	49728633.5	cela1_red_17_50370998	cela1_red_17_49086269
LG5.b.371.20	Female	-1896.56195384718	-1896.56195748491	5	371	20	390	4048	277403279	25543342	50370998	4067	278688008	26828071	49086269	1284729	-7.27546694179182e-06	1	26185706.5	278045643.5	49728633.5	cela1_red_17_50370998	cela1_red_17_49086269
LG5.b.381.20	Both	-2818.05485433271	-2818.05485460727	5	381	20	400	4058	278177396	26317459	49596881	4077	279178981	27319044	48595296	1001585	-5.49121978110634e-07	1	26818251.5	278678188.5	49096088.5	cela1_red_17_49596881	cela1_red_17_48595296
LG5.b.381.20	Male	-884.661277311724	-884.660255493844	5	381	20	400	4058	278177396	26317459	49596881	4077	279178981	27319044	48595296	1001585	0.00204363575994648	0.963942641733591	26818251.5	278678188.5	49096088.5	cela1_red_17_49596881	cela1_red_17_48595296
LG5.b.381.20	Female	-1896.5606590924	-1896.56066403017	5	381	20	400	4058	278177396	26317459	49596881	4077	279178981	27319044	48595296	1001585	-9.87553721643053e-06	1	26818251.5	278678188.5	49096088.5	cela1_red_17_49596881	cela1_red_17_48595296
LG5.b.391.20	Both	-2818.05123461138	-2818.05124533551	5	391	20	410	4068	278723480	26863543	49050797	4087	279763492	27903555	48010785	1040012	-2.14482752198819e-05	1	27383549	279243486	48530791	cela1_red_17_49050797	cela1_red_17_48010785
LG5.b.391.20	Male	-884.660152862347	-884.660155006366	5	391	20	410	4068	278723480	26863543	49050797	4087	279763492	27903555	48010785	1040012	-4.28803764407348e-06	1	27383549	279243486	48530791	cela1_red_17_49050797	cela1_red_17_48010785
LG5.b.391.20	Female	-1896.56203105907	-1896.56203516214	5	391	20	410	4068	278723480	26863543	49050797	4087	279763492	27903555	48010785	1040012	-8.20614468466374e-06	1	27383549	279243486	48530791	cela1_red_17_49050797	cela1_red_17_48010785
LG5.b.401.20	Both	-2818.05444395347	-2818.05444547343	5	401	20	420	4078	279236244	27376307	48538033	4097	280609528	28749591	47164749	1373284	-3.03990964312106e-06	1	28062949	279922886	47851391	cela1_red_17_48538033	cela1_red_17_47164749
LG5.b.401.20	Male	-884.66083185973	-884.660832764586	5	401	20	420	4078	279236244	27376307	48538033	4097	280609528	28749591	47164749	1373284	-1.80971301233512e-06	1	28062949	279922886	47851391	cela1_red_17_48538033	cela1_red_17_47164749
LG5.b.401.20	Female	-1896.56627230797	-1896.56627253909	5	401	20	420	4078	279236244	27376307	48538033	4097	280609528	28749591	47164749	1373284	-4.62244315713178e-07	1	28062949	279922886	47851391	cela1_red_17_48538033	cela1_red_17_47164749
LG5.b.411.20	Both	-2818.06184138856	-2817.86570443999	5	411	20	430	4088	279886294	28026357	47887983	4107	281443864	29583927	46330413	1557570	0.392273897123232	0.531106560219479	28805142	280665079	47109198	cela1_red_17_47887983	cela1_red_17_46330413
LG5.b.411.20	Male	-884.660950090559	-884.660950644403	5	411	20	430	4088	279886294	28026357	47887983	4107	281443864	29583927	46330413	1557570	-1.10768723970978e-06	1	28805142	280665079	47109198	cela1_red_17_47887983	cela1_red_17_46330413
LG5.b.411.20	Female	-1896.56960473982	-1896.48259014043	5	411	20	430	4088	279886294	28026357	47887983	4107	281443864	29583927	46330413	1557570	0.174029198780318	0.676555478248079	28805142	280665079	47109198	cela1_red_17_47887983	cela1_red_17_46330413
LG5.b.421.20	Both	-2818.07146454784	-2817.56914714989	5	421	20	440	4098	280697291	28837354	47076986	4117	282067625	30207688	45706652	1370334	1.00463479590871	0.316191615859238	29522521	281382458	46391819	cela1_red_17_47076986	cela1_red_17_45706652
LG5.b.421.20	Male	-884.659908775445	-884.659910885686	5	421	20	440	4098	280697291	28837354	47076986	4117	282067625	30207688	45706652	1370334	-4.22048196924152e-06	1	29522521	281382458	46391819	cela1_red_17_47076986	cela1_red_17_45706652
LG5.b.421.20	Female	-1896.57339016616	-1896.33128629625	5	421	20	440	4098	280697291	28837354	47076986	4117	282067625	30207688	45706652	1370334	0.48420773981843	0.486522539927467	29522521	281382458	46391819	cela1_red_17_47076986	cela1_red_17_45706652
LG5.b.431.20	Both	-2818.07331548587	-2817.6149333946	5	431	20	450	4108	281471259	29611322	46303018	4127	283038512	31178575	44735765	1567253	0.916764182540646	0.338326029090394	30394948.5	282254885.5	45519391.5	cela1_red_17_46303018	cela1_red_17_44735765
LG5.b.431.20	Male	-884.659449881819	-884.659452726057	5	431	20	450	4108	281471259	29611322	46303018	4127	283038512	31178575	44735765	1567253	-5.68847599424771e-06	1	30394948.5	282254885.5	45519391.5	cela1_red_17_46303018	cela1_red_17_44735765
LG5.b.431.20	Female	-1896.57524832691	-1896.30800147981	5	431	20	450	4108	281471259	29611322	46303018	4127	283038512	31178575	44735765	1567253	0.534493694194225	0.464723719957056	30394948.5	282254885.5	45519391.5	cela1_red_17_46303018	cela1_red_17_44735765
LG5.b.441.20	Both	-2818.07212829326	-2817.38335653173	5	441	20	460	4118	282226470	30366533	45547807	4137	283694977	31835040	44079300	1468507	1.37754352306547	0.240520018236225	31100786.5	282960723.5	44813553.5	cela1_red_17_45547807	cela1_red_17_44079300
LG5.b.441.20	Male	-884.661825265348	-884.493343239994	5	441	20	460	4118	282226470	30366533	45547807	4137	283694977	31835040	44079300	1468507	0.336964050707138	0.561586893437512	31100786.5	282960723.5	44813553.5	cela1_red_17_45547807	cela1_red_17_44079300
LG5.b.441.20	Female	-1896.57490164858	-1896.14717952482	5	441	20	460	4118	282226470	30366533	45547807	4137	283694977	31835040	44079300	1468507	0.855444247521518	0.355016734923143	31100786.5	282960723.5	44813553.5	cela1_red_17_45547807	cela1_red_17_44079300
LG5.b.451.20	Both	-2818.06774926735	-2817.6261323825	5	451	20	470	4128	283049836	31189899	44724441	4147	284298875	32438938	43475402	1249039	0.883233769701292	0.347317503118674	31814418.5	283674355.5	44099921.5	cela1_red_17_44724441	cela1_red_17_43475402
LG5.b.451.20	Male	-884.661784713719	-884.413230038239	5	451	20	470	4128	283049836	31189899	44724441	4147	284298875	32438938	43475402	1249039	0.49710935095959	0.480773009356295	31814418.5	283674355.5	44099921.5	cela1_red_17_44724441	cela1_red_17_43475402
LG5.b.451.20	Female	-1896.57267160566	-1896.33527928564	5	451	20	470	4128	283049836	31189899	44724441	4147	284298875	32438938	43475402	1249039	0.474784640045527	0.490794206234207	31814418.5	283674355.5	44099921.5	cela1_red_17_44724441	cela1_red_17_43475402
LG5.b.461.20	Both	-2818.06540376439	-2817.78867189471	5	461	20	480	4138	283742486	31882549	44031791	4157	285000205	33140268	42774072	1257719	0.553463739344807	0.456905855811161	32511408.5	284371345.5	43402931.5	cela1_red_17_44031791	cela1_red_17_42774072
LG5.b.461.20	Male	-884.66017249698	-884.660179496676	5	461	20	480	4138	283742486	31882549	44031791	4157	285000205	33140268	42774072	1257719	-1.39993910579506e-05	1	32511408.5	284371345.5	43402931.5	cela1_red_17_44031791	cela1_red_17_42774072
LG5.b.461.20	Female	-1896.57300657476	-1896.33609293028	5	461	20	480	4138	283742486	31882549	44031791	4157	285000205	33140268	42774072	1257719	0.473827288944449	0.491231685887529	32511408.5	284371345.5	43402931.5	cela1_red_17_44031791	cela1_red_17_42774072
LG5.b.471.20	Both	-2818.06966185553	-2817.46900840085	5	471	20	490	4148	284347731	32487794	43426546	4167	285511474	33651537	42262803	1163743	1.20130690935457	0.273060625617986	33069665.5	284929602.5	42844674.5	cela1_red_17_43426546	cela1_red_17_42262803
LG5.b.471.20	Male	-884.661360128653	-884.658992735043	5	471	20	490	4148	284347731	32487794	43426546	4167	285511474	33651537	42262803	1163743	0.00473478722005893	0.945141025150535	33069665.5	284929602.5	42844674.5	cela1_red_17_43426546	cela1_red_17_42262803
LG5.b.471.20	Female	-1896.57224531975	-1896.31461699394	5	471	20	490	4148	284347731	32487794	43426546	4167	285511474	33651537	42262803	1163743	0.515256651614891	0.472872103213817	33069665.5	284929602.5	42844674.5	cela1_red_17_43426546	cela1_red_17_42262803
LG5.b.481.20	Both	-2818.06201608377	-2817.87891989579	5	481	20	500	4158	285114730	33254793	42659547	4177	286187770	34327833	41586507	1073040	0.366192375963692	0.545087100266471	33791313	285651250	42123027	cela1_red_17_42659547	cela1_red_17_41586507
LG5.b.481.20	Male	-884.661409760768	-884.657907816729	5	481	20	500	4158	285114730	33254793	42659547	4177	286187770	34327833	41586507	1073040	0.007003888077179	0.933303516237944	33791313	285651250	42123027	cela1_red_17_42659547	cela1_red_17_41586507
LG5.b.481.20	Female	-1896.56898636991	-1896.50217858721	5	481	20	500	4158	285114730	33254793	42659547	4177	286187770	34327833	41586507	1073040	0.13361556539212	0.71471236188642	33791313	285651250	42123027	cela1_red_17_42659547	cela1_red_17_41586507
LG5.b.491.20	Both	-2818.05130635118	-2818.05131039761	5	491	20	510	4168	285573492	33713555	42200785	4187	286718350	34858413	41055927	1144858	-8.09286575531587e-06	1	34285984	286145921	41628356	cela1_red_17_42200785	cela1_red_17_41055927
LG5.b.491.20	Male	-884.661358724907	-884.660255368944	5	491	20	510	4168	285573492	33713555	42200785	4187	286718350	34858413	41055927	1144858	0.00220671192710142	0.962532632596816	34285984	286145921	41628356	cela1_red_17_42200785	cela1_red_17_41055927
LG5.b.491.20	Female	-1896.56546364749	-1896.5654649215	5	491	20	510	4168	285573492	33713555	42200785	4187	286718350	34858413	41055927	1144858	-2.5480230760877e-06	1	34285984	286145921	41628356	cela1_red_17_42200785	cela1_red_17_41055927
LG5.b.501.20	Both	-2818.04591849087	-2818.04592729886	5	501	20	520	4178	286220607	34360670	41553670	4197	287436832	35576895	40337445	1216225	-1.76159728653147e-05	1	34968782.5	286828719.5	40945557.5	cela1_red_17_41553670	cela1_red_17_40337445
LG5.b.501.20	Male	-884.662258323177	-884.557103880618	5	501	20	520	4178	286220607	34360670	41553670	4197	287436832	35576895	40337445	1216225	0.210308885117001	0.646525410707721	34968782.5	286828719.5	40945557.5	cela1_red_17_41553670	cela1_red_17_40337445
LG5.b.501.20	Female	-1896.56102853539	-1896.56103478518	5	501	20	520	4178	286220607	34360670	41553670	4197	287436832	35576895	40337445	1216225	-1.2499590866355e-05	1	34968782.5	286828719.5	40945557.5	cela1_red_17_41553670	cela1_red_17_40337445
LG5.b.511.20	Both	-2818.04539289324	-2818.04540220532	5	511	20	530	4188	286725318	34865381	41048959	4207	287865308	36005371	39908969	1139990	-1.86241632036399e-05	1	35435376	287295313	40478964	cela1_red_17_41048959	cela1_red_17_39908969
LG5.b.511.20	Male	-884.662998117937	-884.418651024931	5	511	20	530	4188	286725318	34865381	41048959	4207	287865308	36005371	39908969	1139990	0.488694186012708	0.484510377055743	35435376	287295313	40478964	cela1_red_17_41048959	cela1_red_17_39908969
LG5.b.511.20	Female	-1896.56036806839	-1896.56037489618	5	511	20	530	4188	286725318	34865381	41048959	4207	287865308	36005371	39908969	1139990	-1.36555859171494e-05	1	35435376	287295313	40478964	cela1_red_17_41048959	cela1_red_17_39908969
LG5.b.521.20	Both	-2818.04800968192	-2818.0480169456	5	521	20	540	4198	287462422	35602485	40311855	4217	288602660	36742723	39171617	1140238	-1.45273470479879e-05	1	36172604	288032541	39741736	cela1_red_17_40311855	cela1_red_17_39171617
LG5.b.521.20	Male	-884.662420773581	-884.52059464538	5	521	20	540	4198	287462422	35602485	40311855	4217	288602660	36742723	39171617	1140238	0.283652256401638	0.594317329542253	36172604	288032541	39741736	cela1_red_17_40311855	cela1_red_17_39171617
LG5.b.521.20	Female	-1896.56130259434	-1896.56130860785	5	521	20	540	4198	287462422	35602485	40311855	4217	288602660	36742723	39171617	1140238	-1.20270256047661e-05	1	36172604	288032541	39741736	cela1_red_17_40311855	cela1_red_17_39171617
LG5.b.531.20	Both	-2818.0549500713	-2818.05495079083	5	531	20	550	4208	287920444	36060507	39853833	4227	288955481	37095544	38818796	1035037	-1.43905799632194e-06	1	36578025.5	288437962.5	39336314.5	cela1_red_17_39853833	cela1_red_17_38818796
LG5.b.531.20	Male	-884.661075574711	-884.661077536573	5	531	20	550	4208	287920444	36060507	39853833	4227	288955481	37095544	38818796	1035037	-3.92372453461576e-06	1	36578025.5	288437962.5	39336314.5	cela1_red_17_39853833	cela1_red_17_38818796
LG5.b.531.20	Female	-1896.56435058378	-1896.56435316819	5	531	20	550	4208	287920444	36060507	39853833	4227	288955481	37095544	38818796	1035037	-5.16882846568478e-06	1	36578025.5	288437962.5	39336314.5	cela1_red_17_39853833	cela1_red_17_38818796
LG5.b.541.20	Both	-2818.06018460163	-2817.89328951977	5	541	20	560	4218	288607092	36747155	39167185	4237	289458171	37598234	38316106	851079	0.333790163736012	0.56343577943984	37172694.5	289032631.5	38741645.5	cela1_red_17_39167185	cela1_red_17_38316106
LG5.b.541.20	Male	-884.661990444889	-884.608903488345	5	541	20	560	4218	288607092	36747155	39167185	4237	289458171	37598234	38316106	851079	0.106173913088242	0.744542850233252	37172694.5	289032631.5	38741645.5	cela1_red_17_39167185	cela1_red_17_38316106
LG5.b.541.20	Female	-1896.56894325898	-1896.44382657216	5	541	20	560	4218	288607092	36747155	39167185	4237	289458171	37598234	38316106	851079	0.25023337364064	0.61691079983319	37172694.5	289032631.5	38741645.5	cela1_red_17_39167185	cela1_red_17_38316106
LG5.b.551.20	Both	-2818.05460369818	-2818.05460959246	5	551	20	570	4228	289008846	37148909	38765431	4247	289996343	38136406	37777934	987497	-1.17885665531503e-05	1	37642657.5	289502594.5	38271682.5	cela1_red_17_38765431	cela1_red_17_37777934
LG5.b.551.20	Male	-884.66192766756	-884.633999595998	5	551	20	570	4228	289008846	37148909	38765431	4247	289996343	38136406	37777934	987497	0.0558561431239468	0.813169593164844	37642657.5	289502594.5	38271682.5	cela1_red_17_38765431	cela1_red_17_37777934
LG5.b.551.20	Female	-1896.56806005488	-1896.51564719206	5	551	20	570	4228	289008846	37148909	38765431	4247	289996343	38136406	37777934	987497	0.104825725633873	0.746113675488242	37642657.5	289502594.5	38271682.5	cela1_red_17_38765431	cela1_red_17_37777934
LG5.b.561.20	Both	-2818.04917197237	-2818.04919833189	5	561	20	580	4238	289527621	37667684	38246656	4257	290738489	38878552	37035788	1210868	-5.27190431967028e-05	1	38273118	290133055	37641222	cela1_red_17_38246656	cela1_red_17_37035788
LG5.b.561.20	Male	-884.661421471208	-884.659535137829	5	561	20	580	4238	289527621	37667684	38246656	4257	290738489	38878552	37035788	1210868	0.00377266675945975	0.951023101659282	38273118	290133055	37641222	cela1_red_17_38246656	cela1_red_17_37035788
LG5.b.561.20	Female	-1896.56540089044	-1896.56540366722	5	561	20	580	4238	289527621	37667684	38246656	4257	290738489	38878552	37035788	1210868	-5.55355745746056e-06	1	38273118	290133055	37641222	cela1_red_17_38246656	cela1_red_17_37035788
LG5.b.571.20	Both	-2818.04826544134	-2818.04827184395	5	571	20	590	4248	290017041	38157104	37757236	4267	291320538	39460601	36453739	1303497	-1.28052251966437e-05	1	38808852.5	290668789.5	37105487.5	cela1_red_17_37757236	cela1_red_17_36453739
LG5.b.571.20	Male	-884.661581080912	-884.651627055657	5	571	20	590	4248	290017041	38157104	37757236	4267	291320538	39460601	36453739	1303497	0.0199080505103666	0.887794189537025	38808852.5	290668789.5	37105487.5	cela1_red_17_37757236	cela1_red_17_36453739
LG5.b.571.20	Female	-1896.5637939558	-1896.56379681673	5	571	20	590	4248	290017041	38157104	37757236	4267	291320538	39460601	36453739	1303497	-5.72186490899185e-06	1	38808852.5	290668789.5	37105487.5	cela1_red_17_37757236	cela1_red_17_36453739
LG5.b.581.20	Both	-2818.06049429693	-2817.97226126323	5	581	20	600	4258	290823423	38963486	36950854	4277	292237193	40377256	35537084	1413770	0.176466067404363	0.674428002984504	39670371	291530308	36243969	cela1_red_17_36950854	cela1_red_17_35537084
LG5.b.581.20	Male	-884.660509306527	-884.660510416768	5	581	20	600	4258	290823423	38963486	36950854	4277	292237193	40377256	35537084	1413770	-2.22048220166471e-06	1	39670371	291530308	36243969	cela1_red_17_36950854	cela1_red_17_35537084
LG5.b.581.20	Female	-1896.56875620977	-1896.52545377046	5	581	20	600	4258	290823423	38963486	36950854	4277	292237193	40377256	35537084	1413770	0.086604878630169	0.768538553297492	39670371	291530308	36243969	cela1_red_17_36950854	cela1_red_17_35537084
LG5.b.591.20	Both	-2818.0626437009	-2817.87958070894	5	591	20	610	4268	291345327	39485390	36428950	4287	292769990	40910053	35004287	1424663	0.366125983924576	0.545123548849952	40197721.5	292057658.5	35716618.5	cela1_red_17_36428950	cela1_red_17_35004287
LG5.b.591.20	Male	-884.66591967506	-883.636089313294	5	591	20	610	4268	291345327	39485390	36428950	4287	292769990	40910053	35004287	1424663	2.05966072353158	0.151243841845007	40197721.5	292057658.5	35716618.5	cela1_red_17_36428950	cela1_red_17_35004287
LG5.b.591.20	Female	-1896.57010148569	-1896.49481280535	5	591	20	610	4268	291345327	39485390	36428950	4287	292769990	40910053	35004287	1424663	0.150577360674561	0.697984221288476	40197721.5	292057658.5	35716618.5	cela1_red_17_36428950	cela1_red_17_35004287
LG5.b.601.20	Both	-2818.06012954981	-2817.84083805131	5	601	20	620	4278	292248210	40388273	35526067	4297	293205403	41345466	34568874	957193	0.438582996996956	0.507807176429725	40866869.5	292726806.5	35047470.5	cela1_red_17_35526067	cela1_red_17_34568874
LG5.b.601.20	Male	-884.667174142205	-883.163251431716	5	601	20	620	4278	292248210	40388273	35526067	4297	293205403	41345466	34568874	957193	3.00784542097722	0.0828623658340693	40866869.5	292726806.5	35047470.5	cela1_red_17_35526067	cela1_red_17_34568874
LG5.b.601.20	Female	-1896.5705513953	-1896.28437098418	5	601	20	620	4278	292248210	40388273	35526067	4297	293205403	41345466	34568874	957193	0.572360822240171	0.449322310682473	40866869.5	292726806.5	35047470.5	cela1_red_17_35526067	cela1_red_17_34568874
LG5.b.611.20	Both	-2818.06633528154	-2817.49666647091	5	611	20	630	4288	292831204	40971267	34943073	4307	293886620	42026683	33887657	1055416	1.13933762126453	0.285792334981524	41498975	293358912	34415365	cela1_red_17_34943073	cela1_red_17_33887657
LG5.b.611.20	Male	-884.661727091626	-884.547515292073	5	611	20	630	4288	292831204	40971267	34943073	4307	293886620	42026683	33887657	1055416	0.228423599105554	0.632695177445593	41498975	293358912	34415365	cela1_red_17_34943073	cela1_red_17_33887657
LG5.b.611.20	Female	-1896.5730035962	-1896.16760322704	5	611	20	630	4288	292831204	40971267	34943073	4307	293886620	42026683	33887657	1055416	0.810800738321632	0.367883618034859	41498975	293358912	34415365	cela1_red_17_34943073	cela1_red_17_33887657
LG5.b.621.20	Both	-2818.07478401876	-2816.04731637332	5	621	20	640	4298	293265178	41405241	34509099	4317	294564542	42704605	33209735	1299364	4.0549352908738	0.0440424068702198	42054923	293914860	33859417	cela1_red_17_34509099	cela1_red_17_33209735
LG5.b.621.20	Male	-884.66484650794	-883.698672798471	5	621	20	640	4298	293265178	41405241	34509099	4317	294564542	42704605	33209735	1299364	1.93234741893616	0.16450185412575	42054923	293914860	33859417	cela1_red_17_34509099	cela1_red_17_33209735
LG5.b.621.20	Female	-1896.57414833041	-1895.23983079294	5	621	20	640	4298	293265178	41405241	34509099	4317	294564542	42704605	33209735	1299364	2.66863507492963	0.102343760778935	42054923	293914860	33859417	cela1_red_17_34509099	cela1_red_17_33209735
LG5.b.631.20	Both	-2818.09619075796	-2815.57538148051	5	631	20	650	4308	293926051	42066114	33848226	4327	295272910	43412973	32501367	1346859	5.04161855489656	0.0247453592676653	42739543.5	294599480.5	33174796.5	cela1_red_17_33848226	cela1_red_17_32501367
LG5.b.631.20	Male	-884.665242191902	-883.680540548585	5	631	20	650	4308	293926051	42066114	33848226	4327	295272910	43412973	32501367	1346859	1.96940328663391	0.160511213965627	42739543.5	294599480.5	33174796.5	cela1_red_17_33848226	cela1_red_17_32501367
LG5.b.631.20	Female	-1896.5888700511	-1894.69838591032	5	631	20	650	4308	293926051	42066114	33848226	4327	295272910	43412973	32501367	1346859	3.7809682815714	0.051838654083747	42739543.5	294599480.5	33174796.5	cela1_red_17_33848226	cela1_red_17_32501367
LG5.b.641.20	Both	-2818.11589938587	-2815.22235293587	5	641	20	660	4318	294622604	42762667	33151673	4337	295762380	43902443	32011897	1139776	5.7870928999846	0.0161442650445445	43332555	295192492	32581785	cela1_red_17_33151673	cela1_red_17_32011897
LG5.b.641.20	Male	-884.662116513219	-884.450396638376	5	641	20	660	4318	294622604	42762667	33151673	4337	295762380	43902443	32011897	1139776	0.423439749685713	0.515225647234402	43332555	295192492	32581785	cela1_red_17_33151673	cela1_red_17_32011897
LG5.b.641.20	Female	-1896.5995725436	-1894.43377591801	5	641	20	660	4318	294622604	42762667	33151673	4337	295762380	43902443	32011897	1139776	4.33159325118731	0.0374112117958759	43332555	295192492	32581785	cela1_red_17_33151673	cela1_red_17_32011897
LG5.b.651.20	Both	-2818.08339530793	-2815.50317520938	5	651	20	670	4328	295341093	43481156	32433184	4347	296275458	44415521	31498819	934365	5.16044019709807	0.0231070400548823	43948338.5	295808275.5	31966001.5	cela1_red_17_32433184	cela1_red_17_31498819
LG5.b.651.20	Male	-884.660319133164	-884.660320737178	5	651	20	670	4328	295341093	43481156	32433184	4347	296275458	44415521	31498819	934365	-3.20802791975439e-06	1	43948338.5	295808275.5	31966001.5	cela1_red_17_32433184	cela1_red_17_31498819
LG5.b.651.20	Female	-1896.57929538922	-1894.65744428213	5	651	20	670	4328	295341093	43481156	32433184	4347	296275458	44415521	31498819	934365	3.8437022141793	0.0499331504768542	43948338.5	295808275.5	31966001.5	cela1_red_17_32433184	cela1_red_17_31498819
LG5.b.661.20	Both	-2818.06226896905	-2817.77499675948	5	661	20	680	4338	295859763	43999826	31914514	4357	297029162	45169225	30745115	1169399	0.574544419156155	0.448458715111504	44584525.5	296444462.5	31329814.5	cela1_red_17_31914514	cela1_red_17_30745115
LG5.b.661.20	Male	-884.661724820272	-884.617299538447	5	661	20	680	4338	295859763	43999826	31914514	4357	297029162	45169225	30745115	1169399	0.0888505636494301	0.765643543167125	44584525.5	296444462.5	31329814.5	cela1_red_17_31914514	cela1_red_17_30745115
LG5.b.661.20	Female	-1896.56865923252	-1896.50617775142	5	661	20	680	4338	295859763	43999826	31914514	4357	297029162	45169225	30745115	1169399	0.124962962209338	0.723712873685436	44584525.5	296444462.5	31329814.5	cela1_red_17_31914514	cela1_red_17_30745115
LG5.b.671.20	Both	-2818.07063108788	-2816.81422037766	5	671	20	690	4348	296295466	44435529	31478811	4367	297397350	45537413	30376927	1101884	2.51282142044147	0.112923595690734	44986471	296846408	30927869	cela1_red_17_31478811	cela1_red_17_30376927
LG5.b.671.20	Male	-884.664988927621	-883.399103261591	5	671	20	690	4348	296295466	44435529	31478811	4367	297397350	45537413	30376927	1101884	2.53177133206009	0.111574902464175	44986471	296846408	30927869	cela1_red_17_31478811	cela1_red_17_30376927
LG5.b.671.20	Female	-1896.57270543648	-1895.929615133	5	671	20	690	4348	296295466	44435529	31478811	4367	297397350	45537413	30376927	1101884	1.28618060696226	0.256753011012081	44986471	296846408	30927869	cela1_red_17_31478811	cela1_red_17_30376927
LG5.b.681.20	Both	-2818.05454745959	-2818.0801629389	5	681	20	700	4358	297066545	45206608	30707732	4377	298286916	46426979	29487361	1220371	-0.0512309586265474	1	45816793.5	297676730.5	30097546.5	cela1_red_17_30707732	cela1_red_17_29487361
LG5.b.681.20	Male	-884.663538356532	-883.887846049335	5	681	20	700	4358	297066545	45206608	30707732	4377	298286916	46426979	29487361	1220371	1.55138461439401	0.212931150658583	45816793.5	297676730.5	30097546.5	cela1_red_17_30707732	cela1_red_17_29487361
LG5.b.681.20	Female	-1896.56537767239	-1896.56537839039	5	681	20	700	4358	297066545	45206608	30707732	4377	298286916	46426979	29487361	1220371	-1.43600254887133e-06	1	45816793.5	297676730.5	30097546.5	cela1_red_17_30707732	cela1_red_17_29487361
LG5.b.691.20	Both	-2818.05120348338	-2818.05120708813	5	691	20	710	4368	297427721	45567784	30346556	4387	298851512	46991575	28922765	1423791	-7.20948901289375e-06	1	46279679.5	298139616.5	29634660.5	cela1_red_17_30346556	cela1_red_17_28922765
LG5.b.691.20	Male	-884.661635198341	-884.643181756908	5	691	20	710	4368	297427721	45567784	30346556	4387	298851512	46991575	28922765	1423791	0.0369068828672425	0.847654756024705	46279679.5	298139616.5	29634660.5	cela1_red_17_30346556	cela1_red_17_28922765
LG5.b.691.20	Female	-1896.56284664904	-1896.56285799987	5	691	20	710	4368	297427721	45567784	30346556	4387	298851512	46991575	28922765	1423791	-2.27016521421319e-05	1	46279679.5	298139616.5	29634660.5	cela1_red_17_30346556	cela1_red_17_28922765
LG5.b.701.20	Both	-2818.05964889974	-2817.93091622365	5	701	20	720	4378	298325596	46465659	29448681	4397	299393876	47533939	28380401	1068280	0.257465352176041	0.611866863644577	46999799	298859736	28914541	cela1_red_17_29448681	cela1_red_17_28380401
LG5.b.701.20	Male	-884.663260976022	-884.345225543098	5	701	20	720	4378	298325596	46465659	29448681	4397	299393876	47533939	28380401	1068280	0.636070865848296	0.425137185223008	46999799	298859736	28914541	cela1_red_17_29448681	cela1_red_17_28380401
LG5.b.701.20	Female	-1896.5684667382	-1896.47967404162	5	701	20	720	4378	298325596	46465659	29448681	4397	299393876	47533939	28380401	1068280	0.177585393156733	0.673456580105929	46999799	298859736	28914541	cela1_red_17_29448681	cela1_red_17_28380401
LG5.b.711.20	Both	-2818.06130006963	-2817.92208996645	5	711	20	730	4388	298896594	47036657	28877683	4407	299963662	48103725	27810615	1067068	0.278420206359442	0.597738543737847	47570191	299430128	28344149	cela1_red_17_28877683	cela1_red_17_27810615
LG5.b.711.20	Male	-884.66571840005	-884.031632933387	5	711	20	730	4388	298896594	47036657	28877683	4407	299963662	48103725	27810615	1067068	1.26817093332556	0.260110092184143	47570191	299430128	28344149	cela1_red_17_28877683	cela1_red_17_27810615
LG5.b.711.20	Female	-1896.56965126305	-1896.46240122887	5	711	20	730	4388	298896594	47036657	28877683	4407	299963662	48103725	27810615	1067068	0.214500068353573	0.643262930036599	47570191	299430128	28344149	cela1_red_17_28877683	cela1_red_17_27810615
LG5.b.721.20	Both	-2818.05333016515	-2818.05333606718	5	721	20	740	4398	299399511	47539574	28374766	4417	300498490	48638553	27275787	1098979	-1.1804068890342e-05	1	48089063.5	299949000.5	27825276.5	cela1_red_17_28374766	cela1_red_17_27275787
LG5.b.721.20	Male	-884.667077145026	-883.85165714666	5	721	20	740	4398	299399511	47539574	28374766	4417	300498490	48638553	27275787	1098979	1.63083999673131	0.201586904567678	48089063.5	299949000.5	27825276.5	cela1_red_17_28374766	cela1_red_17_27275787
LG5.b.721.20	Female	-1896.56108229993	-1896.56109207237	5	721	20	740	4398	299399511	47539574	28374766	4417	300498490	48638553	27275787	1098979	-1.95448747035698e-05	1	48089063.5	299949000.5	27825276.5	cela1_red_17_28374766	cela1_red_17_27275787
LG5.b.731.20	Both	-2818.05419419524	-2818.05419661405	5	731	20	750	4408	300004950	48145013	27769327	4427	300958385	49098448	26815892	953435	-4.83761959912954e-06	1	48621730.5	300481667.5	27292609.5	cela1_red_17_27769327	cela1_red_17_26815892
LG5.b.731.20	Male	-884.666793843044	-883.659394565654	5	731	20	750	4408	300004950	48145013	27769327	4427	300958385	49098448	26815892	953435	2.01479855477965	0.155771943491769	48621730.5	300481667.5	27292609.5	cela1_red_17_27769327	cela1_red_17_26815892
LG5.b.731.20	Female	-1896.56092238814	-1896.56094184242	5	731	20	750	4408	300004950	48145013	27769327	4427	300958385	49098448	26815892	953435	-3.89085612368945e-05	1	48621730.5	300481667.5	27292609.5	cela1_red_17_27769327	cela1_red_17_26815892
LG5.b.741.20	Both	-2818.04931461439	-2818.04933234691	5	741	20	760	4418	300593741	48733804	27180536	4437	301480119	49620182	26294158	886378	-3.54650446752203e-05	1	49176993	301036930	26737347	cela1_red_17_27180536	cela1_red_17_26294158
LG5.b.741.20	Male	-884.664357242532	-884.201571358931	5	741	20	760	4418	300593741	48733804	27180536	4437	301480119	49620182	26294158	886378	0.9255717672022	0.336016248400824	49176993	301036930	26737347	cela1_red_17_27180536	cela1_red_17_26294158
LG5.b.741.20	Female	-1896.56120985867	-1896.56121239265	5	741	20	760	4418	300593741	48733804	27180536	4437	301480119	49620182	26294158	886378	-5.06796004628995e-06	1	49176993	301036930	26737347	cela1_red_17_27180536	cela1_red_17_26294158
LG5.b.751.20	Both	-2818.05963966853	-2817.7958569376	5	751	20	770	4428	300976502	49116565	26797775	4447	302143146	50283209	25631131	1166644	0.527565461869017	0.467632191975488	49699887	301559824	26214453	cela1_red_17_26797775	cela1_red_17_25631131
LG5.b.751.20	Male	-884.663254249233	-883.831293191782	5	751	20	770	4428	300976502	49116565	26797775	4447	302143146	50283209	25631131	1166644	1.66392211490052	0.197074598759737	49699887	301559824	26214453	cela1_red_17_26797775	cela1_red_17_25631131
LG5.b.751.20	Female	-1896.57269092535	-1896.34781488088	5	751	20	770	4428	300976502	49116565	26797775	4447	302143146	50283209	25631131	1166644	0.44975208894266	0.502452706875924	49699887	301559824	26214453	cela1_red_17_26797775	cela1_red_17_25631131
LG5.b.761.20	Both	-2818.06846487231	-2817.54719544454	5	761	20	780	4438	301504943	49645006	26269334	4457	302620980	50761043	25153297	1116037	1.04253885553226	0.307231735584449	50203024.5	302062961.5	25711315.5	cela1_red_17_26269334	cela1_red_17_25153297
LG5.b.761.20	Male	-884.669578318968	-882.571530403461	5	761	20	780	4438	301504943	49645006	26269334	4457	302620980	50761043	25153297	1116037	4.19609583101465	0.0405171588783029	50203024.5	302062961.5	25711315.5	cela1_red_17_26269334	cela1_red_17_25153297
LG5.b.761.20	Female	-1896.57357082309	-1896.25476912824	5	761	20	780	4438	301504943	49645006	26269334	4457	302620980	50761043	25153297	1116037	0.637603389698143	0.424579979180192	50203024.5	302062961.5	25711315.5	cela1_red_17_26269334	cela1_red_17_25153297
LG5.b.771.20	Both	-2818.07056182844	-2817.25667371315	5	771	20	790	4448	302150415	50290478	25623862	4467	303363750	51503813	24410527	1213335	1.62777623057718	0.202010903195299	50897145.5	302757082.5	25017194.5	cela1_red_17_25623862	cela1_red_17_24410527
LG5.b.771.20	Male	-884.673134449251	-882.235312327326	5	771	20	790	4448	302150415	50290478	25623862	4467	303363750	51503813	24410527	1213335	4.87564424384891	0.0272382714779291	50897145.5	302757082.5	25017194.5	cela1_red_17_25623862	cela1_red_17_24410527
LG5.b.771.20	Female	-1896.57054728583	-1896.22596060562	5	771	20	790	4448	302150415	50290478	25623862	4467	303363750	51503813	24410527	1213335	0.68917336042341	0.406445693850649	50897145.5	302757082.5	25017194.5	cela1_red_17_25623862	cela1_red_17_24410527
LG5.b.781.20	Both	-2818.07729064622	-2816.81773929978	5	781	20	800	4458	302808373	50948436	24965904	4477	304126055	52266118	23648222	1317682	2.51910269286964	0.112474569329563	51607277	303467214	24307063	cela1_red_17_24965904	cela1_red_17_23648222
LG5.b.781.20	Male	-884.670775561092	-882.169279783164	5	781	20	800	4458	302808373	50948436	24965904	4477	304126055	52266118	23648222	1317682	5.00299155585571	0.0253035466884793	51607277	303467214	24307063	cela1_red_17_24965904	cela1_red_17_23648222
LG5.b.781.20	Female	-1896.5735578847	-1896.05035785051	5	781	20	800	4458	302808373	50948436	24965904	4477	304126055	52266118	23648222	1317682	1.0464000683819	0.306337642665339	51607277	303467214	24307063	cela1_red_17_24965904	cela1_red_17_23648222
LG5.b.791.20	Both	-2818.06150872696	-2817.68598280681	5	791	20	810	4468	303519938	51660001	24254339	4487	304837911	52977974	22936366	1317973	0.751051840287801	0.386143416123999	52318987.5	304178924.5	23595352.5	cela1_red_17_24254339	cela1_red_17_22936366
LG5.b.791.20	Male	-884.667499554826	-882.392707278764	5	791	20	810	4468	303519938	51660001	24254339	4487	304837911	52977974	22936366	1317973	4.54958455212454	0.0329267347390166	52318987.5	304178924.5	23595352.5	cela1_red_17_24254339	cela1_red_17_22936366
LG5.b.791.20	Female	-1896.56617701124	-1896.56617821653	5	791	20	810	4468	303519938	51660001	24254339	4487	304837911	52977974	22936366	1317973	-2.41058387473458e-06	1	52318987.5	304178924.5	23595352.5	cela1_red_17_24254339	cela1_red_17_22936366
LG5.b.801.20	Both	-2818.0584802948	-2817.57509126581	5	801	20	820	4478	304172873	52312936	23601404	4497	305446851	53586914	22327426	1273978	0.966778057965712	0.325485038532148	52949925	304809862	22964415	cela1_red_17_23601404	cela1_red_17_22327426
LG5.b.801.20	Male	-884.665383364402	-882.657704143702	5	801	20	820	4478	304172873	52312936	23601404	4497	305446851	53586914	22327426	1273978	4.01535844140017	0.0450876384111897	52949925	304809862	22964415	cela1_red_17_23601404	cela1_red_17_22327426
LG5.b.801.20	Female	-1896.56953318621	-1896.40184792375	5	801	20	820	4478	304172873	52312936	23601404	4497	305446851	53586914	22327426	1273978	0.335370524918289	0.562513710504797	52949925	304809862	22964415	cela1_red_17_23601404	cela1_red_17_22327426
LG5.b.811.20	Both	-2818.0640572455	-2817.62333338348	5	811	20	830	4488	304874971	53015034	22899306	4507	305909199	54049262	21865078	1034228	0.881447724034842	0.347805465903244	53532148	305392085	22382192	cela1_red_17_22899306	cela1_red_17_21865078
LG5.b.811.20	Male	-884.66447640603	-882.555657991274	5	811	20	830	4488	304874971	53015034	22899306	4507	305909199	54049262	21865078	1034228	4.21763682951314	0.0400058414733433	53532148	305392085	22382192	cela1_red_17_22899306	cela1_red_17_21865078
LG5.b.811.20	Female	-1896.56999044465	-1896.4338024459	5	811	20	830	4488	304874971	53015034	22899306	4507	305909199	54049262	21865078	1034228	0.272375997510608	0.601742368136915	53532148	305392085	22382192	cela1_red_17_22899306	cela1_red_17_21865078
LG5.b.821.20	Both	-2818.05790083883	-2818.04232584127	5	821	20	840	4498	305501324	53641387	22272953	4517	306712823	54852886	21061454	1211499	0.0311499951294536	0.859906166678774	54247136.5	306107073.5	21667203.5	cela1_red_17_22272953	cela1_sika_17_21061454
LG5.b.821.20	Male	-884.664768291992	-883.438032442333	5	821	20	840	4498	305501324	53641387	22272953	4517	306712823	54852886	21061454	1211499	2.45347169931847	0.117265254291758	54247136.5	306107073.5	21667203.5	cela1_red_17_22272953	cela1_sika_17_21061454
LG5.b.821.20	Female	-1896.56511167623	-1896.56511322307	5	821	20	840	4498	305501324	53641387	22272953	4517	306712823	54852886	21061454	1211499	-3.09368624584749e-06	1	54247136.5	306107073.5	21667203.5	cela1_red_17_22272953	cela1_sika_17_21061454
LG5.b.831.20	Both	-2818.05144009368	-2818.05144328093	5	831	20	850	4508	305974045	54114108	21800232	4527	307111217	55251280	20663060	1137172	-6.37449284113245e-06	1	54682694	306542631	21231646	cela1_red_17_21800232	cela1_red_17_20663060
LG5.b.831.20	Male	-884.665201765306	-883.633562004034	5	831	20	850	4508	305974045	54114108	21800232	4527	307111217	55251280	20663060	1137172	2.06327952254446	0.150885131736319	54682694	306542631	21231646	cela1_red_17_21800232	cela1_red_17_20663060
LG5.b.831.20	Female	-1896.56311084695	-1896.56311391508	5	831	20	850	4508	305974045	54114108	21800232	4527	307111217	55251280	20663060	1137172	-6.13624933976098e-06	1	54682694	306542631	21231646	cela1_red_17_21800232	cela1_red_17_20663060
LG5.b.841.20	Both	-2818.06564547374	-2817.64673671477	5	841	20	860	4518	306716759	54856822	21057518	4537	307671320	55811383	20102957	954561	0.837817517938674	0.360021708667001	55334102.5	307194039.5	20580237.5	cela1_red_17_21057518	cela1_red_17_20102957
LG5.b.841.20	Male	-884.662978871726	-884.448135125966	5	841	20	860	4518	306716759	54856822	21057518	4537	307671320	55811383	20102957	954561	0.429687491520781	0.512142331229715	55334102.5	307194039.5	20580237.5	cela1_red_17_21057518	cela1_red_17_20102957
LG5.b.841.20	Female	-1896.57069379995	-1896.34544000696	5	841	20	860	4518	306716759	54856822	21057518	4537	307671320	55811383	20102957	954561	0.450507585975629	0.502094008402742	55334102.5	307194039.5	20580237.5	cela1_red_17_21057518	cela1_red_17_20102957
LG5.b.851.20	Both	-2818.06784944759	-2817.38688431912	5	851	20	870	4528	307220545	55360608	20553732	4547	308229657	56369720	19544620	1009112	1.36193025694956	0.243203231187928	55865164	307725101	20049176	cela1_red_17_20553732	cela1_red_17_19544620
LG5.b.851.20	Male	-884.662121705643	-884.573584594716	5	851	20	870	4528	307220545	55360608	20553732	4547	308229657	56369720	19544620	1009112	0.177074221853672	0.673899759039476	55865164	307725101	20049176	cela1_red_17_20553732	cela1_red_17_19544620
LG5.b.851.20	Female	-1896.5740399285	-1896.15102721241	5	851	20	870	4528	307220545	55360608	20553732	4547	308229657	56369720	19544620	1009112	0.846025432194438	0.357679160786711	55865164	307725101	20049176	cela1_red_17_20553732	cela1_red_17_19544620
LG5.b.861.20	Both	-2818.05487599769	-2818.05487678237	5	861	20	880	4538	307703936	55843999	20070341	4557	309067908	57207971	18706369	1363972	-1.56935948325554e-06	1	56525985	308385922	19388355	cela1_red_17_20070341	cela1_red_17_18706369
LG5.b.861.20	Male	-884.660246335318	-884.66025383552	5	861	20	880	4538	307703936	55843999	20070341	4557	309067908	57207971	18706369	1363972	-1.50004036640894e-05	1	56525985	308385922	19388355	cela1_red_17_20070341	cela1_red_17_18706369
LG5.b.861.20	Female	-1896.56681880631	-1896.56637824999	5	861	20	880	4538	307703936	55843999	20070341	4557	309067908	57207971	18706369	1363972	0.000881112640399806	0.976319438059293	56525985	308385922	19388355	cela1_red_17_20070341	cela1_red_17_18706369
LG5.b.871.20	Both	-2818.05392875891	-2818.05393022686	5	871	20	890	4548	308329107	56469170	19445170	4567	310248179	58388242	17526098	1919072	-2.93588891508989e-06	1	57428706	309288643	18485634	cela1_red_17_19445170	cela1_red_17_17526098
LG5.b.871.20	Male	-884.659649274917	-884.659651723991	5	871	20	890	4548	308329107	56469170	19445170	4567	310248179	58388242	17526098	1919072	-4.8981476084009e-06	1	57428706	309288643	18485634	cela1_red_17_19445170	cela1_red_17_17526098
LG5.b.871.20	Female	-1896.56371055184	-1896.56371317586	5	871	20	890	4548	308329107	56469170	19445170	4567	310248179	58388242	17526098	1919072	-5.24804636370391e-06	1	57428706	309288643	18485634	cela1_red_17_19445170	cela1_red_17_17526098
LG5.b.881.20	Both	-2818.04632975469	-2818.04633659195	5	881	20	900	4558	309187304	57327367	18586973	4577	311106502	59246565	16667775	1919198	-1.36745338750188e-05	1	58286966	310146903	17627374	cela1_red_17_18586973	cela1_red_17_16667775
LG5.b.881.20	Male	-884.660392186086	-884.660393393897	5	881	20	900	4558	309187304	57327367	18586973	4577	311106502	59246565	16667775	1919198	-2.4156215658877e-06	1	58286966	310146903	17627374	cela1_red_17_18586973	cela1_red_17_16667775
LG5.b.881.20	Female	-1896.55897874669	-1896.55898540651	5	881	20	900	4558	309187304	57327367	18586973	4577	311106502	59246565	16667775	1919198	-1.331963994744e-05	1	58286966	310146903	17627374	cela1_red_17_18586973	cela1_red_17_16667775
LG5.b.891.20	Both	-2818.04256870591	-2818.04257758547	5	891	20	910	4568	310291000	58431063	17483277	4587	311863497	60003560	15910780	1572497	-1.77591127794585e-05	1	59217311.5	311077248.5	16697028.5	cela1_red_17_17483277	cela1_red_17_15910780
LG5.b.891.20	Male	-884.661433233011	-884.660212282051	5	891	20	910	4568	310291000	58431063	17483277	4587	311863497	60003560	15910780	1572497	0.00244190191938287	0.960588093154229	59217311.5	311077248.5	16697028.5	cela1_red_17_17483277	cela1_red_17_15910780
LG5.b.891.20	Female	-1896.5581843774	-1896.55819133206	5	891	20	910	4568	310291000	58431063	17483277	4587	311863497	60003560	15910780	1572497	-1.39093199322815e-05	1	59217311.5	311077248.5	16697028.5	cela1_red_17_17483277	cela1_red_17_15910780
LG5.b.901.20	Both	-2818.05153710252	-2818.05154146543	5	901	20	920	4578	311181874	59321937	16592403	4597	312728961	60869024	15045316	1547087	-8.72583314048825e-06	1	60095480.5	311955417.5	15818859.5	cela1_red_17_16592403	cela1_red_17_15045316
LG5.b.901.20	Male	-884.662702862859	-884.402413824816	5	901	20	920	4578	311181874	59321937	16592403	4597	312728961	60869024	15045316	1547087	0.520578076086167	0.470595195326802	60095480.5	311955417.5	15818859.5	cela1_red_17_16592403	cela1_red_17_15045316
LG5.b.901.20	Female	-1896.56112659447	-1896.5611317406	5	901	20	920	4578	311181874	59321937	16592403	4597	312728961	60869024	15045316	1547087	-1.02922490441415e-05	1	60095480.5	311955417.5	15818859.5	cela1_red_17_16592403	cela1_red_17_15045316
LG5.b.911.20	Both	-2818.0530307023	-2818.05303302287	5	911	20	930	4588	311892653	60032716	15881624	4607	313307391	61447454	14466886	1414738	-4.64114418718964e-06	1	60740085	312600022	15174255	cela1_red_17_15881624	cela1_red_17_14466886
LG5.b.911.20	Male	-884.662631681734	-884.378044897984	5	911	20	930	4588	311892653	60032716	15881624	4607	313307391	61447454	14466886	1414738	0.569173567500457	0.450587505627662	60740085	312600022	15174255	cela1_red_17_15881624	cela1_red_17_14466886
LG5.b.911.20	Female	-1896.56290652442	-1896.56290996122	5	911	20	930	4588	311892653	60032716	15881624	4607	313307391	61447454	14466886	1414738	-6.87359352014028e-06	1	60740085	312600022	15174255	cela1_red_17_15881624	cela1_red_17_14466886
LG5.b.921.20	Both	-2818.05239888237	-2818.05240169951	5	921	20	940	4598	312778032	60918095	14996245	4617	313969646	62109709	13804631	1191614	-5.63426874577999e-06	1	61513902	313373839	14400438	cela1_red_17_14996245	cela1_red_17_13804631
LG5.b.921.20	Male	-884.661277200773	-884.660104675312	5	921	20	940	4598	312778032	60918095	14996245	4617	313969646	62109709	13804631	1191614	0.00234505092203108	0.961376957105676	61513902	313373839	14400438	cela1_red_17_14996245	cela1_red_17_13804631
LG5.b.921.20	Female	-1896.56510917404	-1896.56511068037	5	921	20	940	4598	312778032	60918095	14996245	4617	313969646	62109709	13804631	1191614	-3.01265254165628e-06	1	61513902	313373839	14400438	cela1_red_17_14996245	cela1_red_17_13804631
LG5.b.931.20	Both	-2818.07844455027	-2816.8889676563	5	931	20	950	4608	313344123	61484186	14430154	4627	314316314	62456377	13457963	972191	2.37895378793473	0.122979883393052	61970281.5	313830218.5	13944058.5	cela1_red_17_14430154	cela1_red_17_13457963
LG5.b.931.20	Male	-884.664214439952	-883.397130719744	5	931	20	950	4608	313344123	61484186	14430154	4627	314316314	62456377	13457963	972191	2.53416744041556	0.111405634685884	61970281.5	313830218.5	13944058.5	cela1_red_17_14430154	cela1_red_17_13457963
LG5.b.931.20	Female	-1896.57447751022	-1896.21468475777	5	931	20	950	4608	313344123	61484186	14430154	4627	314316314	62456377	13457963	972191	0.719585504906263	0.396279904709842	61970281.5	313830218.5	13944058.5	cela1_red_17_14430154	cela1_red_17_13457963
LG5.b.941.20	Both	-2818.08981302877	-2816.33817710185	5	941	20	960	4618	314027325	62167388	13746952	4637	314839097	62979160	12935180	811772	3.50327185384504	0.0612477141281144	62573274	314433211	13341066	cela1_red_17_13746952	cela1_red_17_12935180
LG5.b.941.20	Male	-884.664791372485	-883.485790104547	5	941	20	960	4618	314027325	62167388	13746952	4637	314839097	62979160	12935180	811772	2.35800253587536	0.124641694210811	62573274	314433211	13341066	cela1_red_17_13746952	cela1_red_17_12935180
LG5.b.941.20	Female	-1896.58030637023	-1895.78480417079	5	941	20	960	4618	314027325	62167388	13746952	4637	314839097	62979160	12935180	811772	1.59100439886515	0.207182691931014	62573274	314433211	13341066	cela1_red_17_13746952	cela1_red_17_12935180
LG5.b.951.20	Both	-2818.07424990615	-2817.52043281687	5	951	20	970	4628	314347595	62487658	13426682	4647	315348641	63488704	12425636	1001046	1.10763417856651	0.292596804363249	62988181	314848118	12926159	cela1_red_17_13426682	cela1_red_17_12425636
LG5.b.951.20	Male	-884.662293695738	-884.545458924071	5	951	20	970	4628	314347595	62487658	13426682	4647	315348641	63488704	12425636	1001046	0.233669543332553	0.628816166147771	62988181	314848118	12926159	cela1_red_17_13426682	cela1_red_17_12425636
LG5.b.951.20	Female	-1896.57524140693	-1896.17743761597	5	951	20	970	4628	314347595	62487658	13426682	4647	315348641	63488704	12425636	1001046	0.795607581913373	0.372409883622127	62988181	314848118	12926159	cela1_red_17_13426682	cela1_red_17_12425636
LG5.b.961.20	Both	-2818.05725290521	-2818.05434076487	5	961	20	980	4638	314880228	63020291	12894049	4657	315949210	64089273	11825067	1068982	0.00582428067718865	0.93916692111033	63554782	315414719	12359558	cela1_red_17_12894049	cela1_red_17_11825067
LG5.b.961.20	Male	-884.66167247283	-884.649235184179	5	961	20	980	4638	314880228	63020291	12894049	4657	315949210	64089273	11825067	1068982	0.0248745773023984	0.874679990926976	63554782	315414719	12359558	cela1_red_17_12894049	cela1_red_17_11825067
LG5.b.961.20	Female	-1896.56932916832	-1896.52533434519	5	961	20	980	4638	314880228	63020291	12894049	4657	315949210	64089273	11825067	1068982	0.0879896462593024	0.766748632068533	63554782	315414719	12359558	cela1_red_17_12894049	cela1_red_17_11825067
LG5.b.971.20	Both	-2818.05359455815	-2818.05359627893	5	971	20	990	4648	315386853	63526916	12387424	4667	316439611	64579674	11334666	1052758	-3.44155796483392e-06	1	64053295	315913232	11861045	cela1_red_17_12387424	cela1_red_17_11334666
LG5.b.971.20	Male	-884.663940292816	-884.066374516073	5	971	20	990	4648	315386853	63526916	12387424	4667	316439611	64579674	11334666	1052758	1.19513155348432	0.274296899612266	64053295	315913232	11861045	cela1_red_17_12387424	cela1_red_17_11334666
LG5.b.971.20	Female	-1896.56659118577	-1896.56659174073	5	971	20	990	4648	315386853	63526916	12387424	4667	316439611	64579674	11334666	1052758	-1.10992186819203e-06	1	64053295	315913232	11861045	cela1_red_17_12387424	cela1_red_17_11334666
LG5.b.981.20	Both	-2818.05980899085	-2817.98705739898	5	981	20	1000	4658	315998252	64138315	11776025	4677	316800018	64940081	10974259	801766	0.145503183743131	0.702870259223454	64539198	316399135	11375142	cela1_red_17_11776025	cela1_red_17_10974259
LG5.b.981.20	Male	-884.666231978945	-883.310765797564	5	981	20	1000	4658	315998252	64138315	11776025	4677	316800018	64940081	10974259	801766	2.71093236276215	0.0996627271558459	64539198	316399135	11375142	cela1_red_17_11776025	cela1_red_17_10974259
LG5.b.981.20	Female	-1896.56648987815	-1896.56649000392	5	981	20	1000	4658	315998252	64138315	11776025	4677	316800018	64940081	10974259	801766	-2.51545770879602e-07	1	64539198	316399135	11375142	cela1_red_17_11776025	cela1_red_17_10974259
LG5.b.991.20	Both	-2818.06037570177	-2817.98450163955	5	991	20	1010	4668	316461891	64601954	11312386	4687	317311561	65451624	10462716	849670	0.151748124423648	0.696870354433296	65026789	316886726	10887551	cela1_red_17_11312386	cela1_red_17_10462716
LG5.b.991.20	Male	-884.665325868664	-883.37586705533	5	991	20	1010	4668	316461891	64601954	11312386	4687	317311561	65451624	10462716	849670	2.5789176266685	0.108295690824715	65026789	316886726	10887551	cela1_red_17_11312386	cela1_red_17_10462716
LG5.b.991.20	Female	-1896.56629846149	-1896.5662997549	5	991	20	1010	4668	316461891	64601954	11312386	4687	317311561	65451624	10462716	849670	-2.58681848208653e-06	1	65026789	316886726	10887551	cela1_red_17_11312386	cela1_red_17_10462716
LG5.b.1001.20	Both	-2818.05522493906	-2818.05522522419	5	1001	20	1020	4678	316831426	64971489	10942851	4697	317845823	65985886	9928454	1014397	-5.70254087506328e-07	1	65478687.5	317338624.5	10435652.5	cela1_red_17_10942851	cela1_red_17_9928454
LG5.b.1001.20	Male	-884.663224167761	-884.291479443764	5	1001	20	1020	4678	316831426	64971489	10942851	4697	317845823	65985886	9928454	1014397	0.743489447992943	0.388545371251809	65478687.5	317338624.5	10435652.5	cela1_red_17_10942851	cela1_red_17_9928454
LG5.b.1001.20	Female	-1896.56378798393	-1896.56379058751	5	1001	20	1020	4678	316831426	64971489	10942851	4697	317845823	65985886	9928454	1014397	-5.2071600293857e-06	1	65478687.5	317338624.5	10435652.5	cela1_red_17_10942851	cela1_red_17_9928454
LG5.b.1011.20	Both	-2818.04604428075	-2818.04605197779	5	1011	20	1030	4688	317343477	65483540	10430800	4707	318486855	66626918	9287422	1143378	-1.53940882228198e-05	1	66055229	317915166	9859111	cela1_red_17_10430800	cela1_red_17_9287422
LG5.b.1011.20	Male	-884.663158186825	-884.431320435021	5	1011	20	1030	4688	317343477	65483540	10430800	4707	318486855	66626918	9287422	1143378	0.463675503607647	0.495911212844533	66055229	317915166	9859111	cela1_red_17_10430800	cela1_red_17_9287422
LG5.b.1011.20	Female	-1896.56055311091	-1896.56055894223	5	1011	20	1030	4688	317343477	65483540	10430800	4707	318486855	66626918	9287422	1143378	-1.16626365525008e-05	1	66055229	317915166	9859111	cela1_red_17_10430800	cela1_red_17_9287422
LG5.b.1021.20	Both	-2818.05178424926	-2818.05178631121	5	1021	20	1040	4698	317902482	66042545	9871795	4717	319209621	67349684	8564656	1307139	-4.12391273130197e-06	1	66696114.5	318556051.5	9218225.5	cela1_red_17_9871795	cela1_red_17_8564656
LG5.b.1021.20	Male	-884.664090250895	-884.109205951402	5	1021	20	1040	4698	317902482	66042545	9871795	4717	319209621	67349684	8564656	1307139	1.10976859898597	0.292132255504413	66696114.5	318556051.5	9218225.5	cela1_red_17_9871795	cela1_red_17_8564656
LG5.b.1021.20	Female	-1896.56495040709	-1896.56495192894	5	1021	20	1040	4698	317902482	66042545	9871795	4717	319209621	67349684	8564656	1307139	-3.0436999622907e-06	1	66696114.5	318556051.5	9218225.5	cela1_red_17_9871795	cela1_red_17_8564656
LG5.b.1031.20	Both	-2818.05856629207	-2817.90432119913	5	1031	20	1050	4708	318555272	66695335	9219005	4727	319666864	67806927	8107413	1111592	0.308490185874689	0.578608148689204	67251131	319111068	8663209	cela1_red_17_9219005	cela1_red_17_8107413
LG5.b.1031.20	Male	-884.66277738024	-884.486673929893	5	1031	20	1050	4708	318555272	66695335	9219005	4727	319666864	67806927	8107413	1111592	0.352206900694682	0.552866507897758	67251131	319111068	8663209	cela1_red_17_9219005	cela1_red_17_8107413
LG5.b.1031.20	Female	-1896.56872918039	-1896.4115022933	5	1031	20	1050	4708	318555272	66695335	9219005	4727	319666864	67806927	8107413	1111592	0.314453774171398	0.574959944681793	67251131	319111068	8663209	cela1_red_17_9219005	cela1_red_17_8107413
LG5.b.1041.20	Both	-2818.07467958924	-2816.85273281249	5	1041	20	1060	4718	319228653	67368716	8545624	4737	320068154	68208217	7706123	839501	2.44389355350177	0.117983051137659	67788466.5	319648403.5	8125873.5	cela1_red_17_8545624	cela1_red_17_7706123
LG5.b.1041.20	Male	-884.662816814416	-884.495074120006	5	1041	20	1060	4718	319228653	67368716	8545624	4737	320068154	68208217	7706123	839501	0.335485388819961	0.562446805786222	67788466.5	319648403.5	8125873.5	cela1_red_17_8545624	cela1_red_17_7706123
LG5.b.1041.20	Female	-1896.57714681408	-1895.79014282766	5	1041	20	1060	4718	319228653	67368716	8545624	4737	320068154	68208217	7706123	839501	1.57400797283208	0.209625912287844	67788466.5	319648403.5	8125873.5	cela1_red_17_8545624	cela1_red_17_7706123
LG5.b.1051.20	Both	-2818.08772762462	-2816.39604084599	5	1051	20	1070	4728	319678474	67818537	8095803	4747	320819203	68959266	6955074	1140729	3.3833735572598	0.0658571253441623	68388901.5	320248838.5	7525438.5	cela1_red_17_8095803	cela1_red_17_6955074
LG5.b.1051.20	Male	-884.663152154212	-884.44340495114	5	1051	20	1070	4728	319678474	67818537	8095803	4747	320819203	68959266	6955074	1140729	0.439494406142103	0.507366584962744	68388901.5	320248838.5	7525438.5	cela1_red_17_8095803	cela1_red_17_6955074
LG5.b.1051.20	Female	-1896.58532883506	-1895.12929082838	5	1051	20	1070	4728	319678474	67818537	8095803	4747	320819203	68959266	6955074	1140729	2.91207601335236	0.0879186366520468	68388901.5	320248838.5	7525438.5	cela1_red_17_8095803	cela1_red_17_6955074
LG5.b.1061.20	Both	-2818.0755067572	-2817.4722932985	5	1061	20	1080	4738	320119221	68259284	7655056	4757	321249352	69389415	6524925	1130131	1.20642691739158	0.272040918028733	68824349.5	320684286.5	7089990.5	cela1_red_17_7655056	cela1_red_17_6524925
LG5.b.1061.20	Male	-884.661575537432	-884.634943649457	5	1061	20	1080	4738	320119221	68259284	7655056	4757	321249352	69389415	6524925	1130131	0.0532637759506542	0.817478368059262	68824349.5	320684286.5	7089990.5	cela1_red_17_7655056	cela1_red_17_6524925
LG5.b.1061.20	Female	-1896.57811689154	-1896.11872636006	5	1061	20	1080	4738	320119221	68259284	7655056	4757	321249352	69389415	6524925	1130131	0.918781062972812	0.337795228985251	68824349.5	320684286.5	7089990.5	cela1_red_17_7655056	cela1_red_17_6524925
LG5.b.1071.20	Both	-2818.08260603448	-2816.58662131584	5	1071	20	1090	4748	320894515	69034578	6879762	4767	321746050	69886113	6028227	851535	2.99196943728111	0.0836783419416827	69460345.5	321320282.5	6453994.5	cela1_red_17_6879762	cela1_red_17_6028227
LG5.b.1071.20	Male	-884.659434720723	-884.659438437344	5	1071	20	1090	4748	320894515	69034578	6879762	4767	321746050	69886113	6028227	851535	-7.43324062568718e-06	1	69460345.5	321320282.5	6453994.5	cela1_red_17_6879762	cela1_red_17_6028227
LG5.b.1071.20	Female	-1896.58067612972	-1895.597419102	5	1071	20	1090	4748	320894515	69034578	6879762	4767	321746050	69886113	6028227	851535	1.9665140554489	0.160818361959069	69460345.5	321320282.5	6453994.5	cela1_red_17_6879762	cela1_red_17_6028227
LG5.b.1081.20	Both	-2818.11120317269	-2815.00805130963	5	1081	20	1100	4758	321261589	69401652	6512688	4777	322100086	70240149	5674191	838497	6.20630372610412	0.0127296157795834	69820900.5	321680837.5	6093439.5	cela1_red_17_6512688	cela1_red_17_5674191
LG5.b.1081.20	Male	-884.660707142963	-884.66070807782	5	1081	20	1100	4758	321261589	69401652	6512688	4777	322100086	70240149	5674191	838497	-1.86971305993211e-06	1	69820900.5	321680837.5	6093439.5	cela1_red_17_6512688	cela1_red_17_5674191
LG5.b.1081.20	Female	-1896.59677174147	-1894.05364722559	5	1081	20	1100	4758	321261589	69401652	6512688	4777	322100086	70240149	5674191	838497	5.08624903176269	0.0241162994335631	69820900.5	321680837.5	6093439.5	cela1_red_17_6512688	cela1_red_17_5674191
LG5.b.1091.20	Both	-2818.10427315704	-2815.44246032053	5	1091	20	1110	4768	321793932	69933995	5980345	4787	322821970	70962033	4952307	1028038	5.32362567301971	0.021038193484967	70448014	322307951	5466326	cela1_red_17_5980345	cela1_red_17_4952307
LG5.b.1091.20	Male	-884.660477469623	-884.660478840825	5	1091	20	1110	4768	321793932	69933995	5980345	4787	322821970	70962033	4952307	1028038	-2.74240392172942e-06	1	70448014	322307951	5466326	cela1_red_17_5980345	cela1_red_17_4952307
LG5.b.1091.20	Female	-1896.59282369553	-1894.78237574532	5	1091	20	1110	4768	321793932	69933995	5980345	4787	322821970	70962033	4952307	1028038	3.62089590041933	0.0570581392521063	70448014	322307951	5466326	cela1_red_17_5980345	cela1_red_17_4952307
LG5.b.1101.20	Both	-2818.06341437241	-2817.86647433139	5	1101	20	1120	4778	322137160	70277223	5637117	4797	323394796	71534859	4379481	1257636	0.393880082044234	0.530266884657803	70906041	322765978	5008299	cela1_red_17_5637117	cela1_red_17_4379481
LG5.b.1101.20	Male	-884.661496109602	-884.660555718182	5	1101	20	1120	4778	322137160	70277223	5637117	4797	323394796	71534859	4379481	1257636	0.00188078283895265	0.96540819136869	70906041	322765978	5008299	cela1_red_17_5637117	cela1_red_17_4379481
LG5.b.1101.20	Female	-1896.56935622635	-1896.52997540722	5	1101	20	1120	4778	322137160	70277223	5637117	4797	323394796	71534859	4379481	1257636	0.0787616382654051	0.778982667093963	70906041	322765978	5008299	cela1_red_17_5637117	cela1_red_17_4379481
LG5.b.1111.20	Both	-2818.05537933381	-2818.0553805504	5	1111	20	1130	4788	322843759	70983822	4930518	4807	323789428	71929491	3984849	945669	-2.43317299464252e-06	1	71456656.5	323316593.5	4457683.5	cela1_red_17_4930518	cela1_red_17_3984849
LG5.b.1111.20	Male	-884.66263736055	-884.501010911098	5	1111	20	1130	4788	322843759	70983822	4930518	4807	323789428	71929491	3984849	945669	0.323252898904229	0.569659298472122	71456656.5	323316593.5	4457683.5	cela1_red_17_4930518	cela1_red_17_3984849
LG5.b.1111.20	Female	-1896.56131108953	-1896.56131797214	5	1111	20	1130	4788	322843759	70983822	4930518	4807	323789428	71929491	3984849	945669	-1.37652177727432e-05	1	71456656.5	323316593.5	4457683.5	cela1_red_17_4930518	cela1_red_17_3984849
LG5.b.1121.20	Both	-2818.06949026168	-2817.90604419859	5	1121	20	1140	4798	323417320	71557383	4356957	4817	324257074	72397137	3517203	839754	0.3268921261797	0.567494872927102	71977260	323837197	3937080	cela1_red_17_4356957	cela1_red_17_3517203
LG5.b.1121.20	Male	-884.660046158121	-884.660048354473	5	1121	20	1140	4798	323417320	71557383	4356957	4817	324257074	72397137	3517203	839754	-4.39270297647454e-06	1	71977260	323837197	3937080	cela1_red_17_4356957	cela1_red_17_3517203
LG5.b.1121.20	Female	-1896.569201681	-1896.55354694712	5	1121	20	1140	4798	323417320	71557383	4356957	4817	324257074	72397137	3517203	839754	0.0313094677644585	0.859551736231657	71977260	323837197	3937080	cela1_red_17_4356957	cela1_red_17_3517203
LG5.b.1131.20	Both	-2818.07809897548	-2817.31332978204	5	1131	20	1150	4808	323821299	71961362	3952978	4827	324743983	72884046	3030294	922684	1.52953838688882	0.216181737856434	72422704	324282641	3491636	cela1_red_17_3952978	cela1_red_17_3030294
LG5.b.1131.20	Male	-884.661952286432	-884.59364994364	5	1131	20	1150	4808	323821299	71961362	3952978	4827	324743983	72884046	3030294	922684	0.136604685582824	0.711680021249167	72422704	324282641	3491636	cela1_red_17_3952978	cela1_red_17_3030294
LG5.b.1131.20	Female	-1896.57274579689	-1896.39789152736	5	1131	20	1150	4808	323821299	71961362	3952978	4827	324743983	72884046	3030294	922684	0.349708539053154	0.554278165416477	72422704	324282641	3491636	cela1_red_17_3952978	cela1_red_17_3030294
LG5.b.1141.20	Both	-2818.08677628925	-2817.01230283208	5	1141	20	1160	4818	324352361	72492424	3421916	4837	325187042	73327105	2587235	834681	2.14894691433801	0.142667715853056	72909764.5	324769701.5	3004575.5	cela1_red_17_3421916	cela1_red_17_2587235
LG5.b.1141.20	Male	-884.663525179956	-884.351882053611	5	1141	20	1160	4818	324352361	72492424	3421916	4837	325187042	73327105	2587235	834681	0.623286252689468	0.429828709041446	72909764.5	324769701.5	3004575.5	cela1_red_17_3421916	cela1_red_17_2587235
LG5.b.1141.20	Female	-1896.57481161508	-1896.34834483622	5	1141	20	1160	4818	324352361	72492424	3421916	4837	325187042	73327105	2587235	834681	0.452933557724464	0.500945136706183	72909764.5	324769701.5	3004575.5	cela1_red_17_3421916	cela1_red_17_2587235
LG5.b.1151.20	Both	-2818.06794565294	-2817.76268423089	5	1151	20	1170	4828	324776555	72916618	2997722	4847	326001063	74141126	1773214	1224508	0.610522844104707	0.434591017999619	73528872	325388809	2385468	cela1_red_17_2997722	cela1_red_17_1773214
LG5.b.1151.20	Male	-884.660549654487	-884.660550860955	5	1151	20	1170	4828	324776555	72916618	2997722	4847	326001063	74141126	1773214	1224508	-2.41293787439645e-06	1	73528872	325388809	2385468	cela1_red_17_2997722	cela1_red_17_1773214
LG5.b.1151.20	Female	-1896.56917004697	-1896.52477297204	5	1151	20	1170	4828	324776555	72916618	2997722	4847	326001063	74141126	1773214	1224508	0.0887941498594955	0.765715778000084	73528872	325388809	2385468	cela1_red_17_2997722	cela1_red_17_1773214
LG5.b.1161.20	Both	-2818.06886306703	-2817.70245438858	5	1161	20	1180	4838	325251950	73392013	2522327	4857	327017801	75157864	1204854	1765851	0.732817356905798	0.391971495035214	74274938.5	326134875.5	1863590.5	cela1_red_17_2522327	cela1_red_19_1204854
LG5.b.1161.20	Male	-884.658807852085	-884.658812110597	5	1161	20	1180	4838	325251950	73392013	2522327	4857	327017801	75157864	1204854	1765851	-8.51702384352393e-06	1	74274938.5	326134875.5	1863590.5	cela1_red_17_2522327	cela1_red_19_1204854
LG5.b.1161.20	Female	-1896.57410028045	-1896.27995695372	5	1161	20	1180	4838	325251950	73392013	2522327	4857	327017801	75157864	1204854	1765851	0.588286653462092	0.443082425015888	74274938.5	326134875.5	1863590.5	cela1_red_17_2522327	cela1_red_19_1204854
LG5.b.1171.20	Both	-2818.10321464541	-2816.16521769932	5	1171	20	1190	4848	326026767	74166830	1747510	4867	328010193	76150256	2197246	1983426	3.87599389218485	0.0489813008782749	75158543	327018480	1972378	cela1_red_17_1747510	cela1_red_19_2197246
LG5.b.1171.20	Male	-884.660568036906	-884.66056955571	5	1171	20	1190	4848	326026767	74166830	1747510	4867	328010193	76150256	2197246	1983426	-3.03760793940455e-06	1	75158543	327018480	1972378	cela1_red_17_1747510	cela1_red_19_2197246
LG5.b.1171.20	Female	-1896.59417993604	-1894.98111875648	5	1171	20	1190	4848	326026767	74166830	1747510	4867	328010193	76150256	2197246	1983426	3.22612235912766	0.0724721011012479	75158543	327018480	1972378	cela1_red_17_1747510	cela1_red_19_2197246
LG5.b.1181.20	Both	-2818.10133329171	-2815.90675746856	5	1181	20	1200	4858	327057923	75197986	1244976	4877	328991988	77132051	3179041	1934065	4.38915164629179	0.0361683056702854	76165018.5	328024955.5	2212008.5	cela1_red_19_1244976	cela1_red_19_3179041
LG5.b.1181.20	Male	-884.660869271701	-884.660871093783	5	1181	20	1200	4858	327057923	75197986	1244976	4877	328991988	77132051	3179041	1934065	-3.64416314369009e-06	1	76165018.5	328024955.5	2212008.5	cela1_red_19_1244976	cela1_red_19_3179041
LG5.b.1181.20	Female	-1896.59380502286	-1894.70413034128	5	1181	20	1200	4858	327057923	75197986	1244976	4877	328991988	77132051	3179041	1934065	3.77934936316933	0.0518888338881319	76165018.5	328024955.5	2212008.5	cela1_red_19_1244976	cela1_red_19_3179041
LG5.b.1191.20	Both	-2818.10782975489	-2815.521968323	5	1191	20	1210	4868	328175749	76315812	2362802	4887	329846124	77986187	4033177	1670375	5.17172286378445	0.0229574365704153	77150999.5	329010936.5	3197989.5	cela1_red_19_2362802	cela1_red_19_4033177
LG5.b.1191.20	Male	-884.662204232012	-884.548890911865	5	1191	20	1210	4868	328175749	76315812	2362802	4887	329846124	77986187	4033177	1670375	0.226626640293944	0.634036484010867	77150999.5	329010936.5	3197989.5	cela1_red_19_2362802	cela1_red_19_4033177
LG5.b.1191.20	Female	-1896.59507059608	-1894.66419967249	5	1191	20	1210	4868	328175749	76315812	2362802	4887	329846124	77986187	4033177	1670375	3.86174184717947	0.049399018596079	77150999.5	329010936.5	3197989.5	cela1_red_19_2362802	cela1_red_19_4033177
LG5.b.1201.20	Both	-2818.10776600641	-2816.04748766182	5	1201	20	1220	4878	329153367	77293430	3340420	4897	330582927	78722990	4769980	1429560	4.12055668918947	0.0423651354705263	78008210	329868147	4055200	cela1_red_19_3340420	cela1_red_19_4769980
LG5.b.1201.20	Male	-884.66570627993	-883.546508814154	5	1201	20	1220	4878	329153367	77293430	3340420	4897	330582927	78722990	4769980	1429560	2.2383949315531	0.134620656180541	78008210	329868147	4055200	cela1_red_19_3340420	cela1_red_19_4769980
LG5.b.1201.20	Female	-1896.59016281653	-1895.37288338025	5	1201	20	1220	4878	329153367	77293430	3340420	4897	330582927	78722990	4769980	1429560	2.43455887255641	0.118687278960155	78008210	329868147	4055200	cela1_red_19_3340420	cela1_red_19_4769980
LG5.b.1211.20	Both	-2818.09407937999	-2816.6498053494	5	1211	20	1230	4888	329885265	78025328	4072318	4907	331246974	79387037	5434027	1361709	2.88854806118434	0.0892112903692159	78706182.5	330566119.5	4753172.5	cela1_red_19_4072318	cela1_red_19_5434027
LG5.b.1211.20	Male	-884.664710228091	-883.880445601991	5	1211	20	1230	4888	329885265	78025328	4072318	4907	331246974	79387037	5434027	1361709	1.56852925220096	0.210420730543335	78706182.5	330566119.5	4753172.5	cela1_red_19_4072318	cela1_red_19_5434027
LG5.b.1211.20	Female	-1896.58150678825	-1895.84286179859	5	1211	20	1230	4888	329885265	78025328	4072318	4907	331246974	79387037	5434027	1361709	1.47728997932427	0.224199012001555	78706182.5	330566119.5	4753172.5	cela1_red_19_4072318	cela1_red_19_5434027
LG5.b.1221.20	Both	-2818.09153225768	-2816.51447198762	5	1221	20	1240	4898	330685471	78825534	4872524	4917	332585977	80726040	6773030	1900506	3.15412054013814	0.0757354906993434	79775787	331635724	5822777	cela1_red_19_4872524	cela1_red_19_6773030
LG5.b.1221.20	Male	-884.663209465737	-884.266783895501	5	1221	20	1240	4898	330685471	78825534	4872524	4917	332585977	80726040	6773030	1900506	0.792851140473203	0.373239393261536	79775787	331635724	5822777	cela1_red_19_4872524	cela1_red_19_6773030
LG5.b.1221.20	Female	-1896.58471836173	-1895.28932064716	5	1221	20	1240	4898	330685471	78825534	4872524	4917	332585977	80726040	6773030	1900506	2.59079542915515	0.107486343567901	79775787	331635724	5822777	cela1_red_19_4872524	cela1_red_19_6773030
LG5.b.1231.20	Both	-2818.08686884342	-2816.15282098993	5	1231	20	1250	4908	331357231	79497294	5544284	4927	333185366	81325429	7372419	1828135	3.86809570698006	0.049212328459788	80411361.5	332271298.5	6458351.5	cela1_red_19_5544284	cela1_red_19_7372419
LG5.b.1231.20	Male	-884.662634183834	-884.50318711411	5	1231	20	1250	4908	331357231	79497294	5544284	4927	333185366	81325429	7372419	1828135	0.318894139449185	0.572272985713843	80411361.5	332271298.5	6458351.5	cela1_red_19_5544284	cela1_red_19_7372419
LG5.b.1231.20	Female	-1896.58683018819	-1894.6149173802	5	1231	20	1250	4908	331357231	79497294	5544284	4927	333185366	81325429	7372419	1828135	3.94382561598741	0.0470436792001505	80411361.5	332271298.5	6458351.5	cela1_red_19_5544284	cela1_red_19_7372419
LG5.b.1241.20	Both	-2818.08713439399	-2816.52186236627	5	1241	20	1260	4918	332605563	80745626	6792616	4937	333852624	81992687	8039677	1247061	3.13054405542789	0.0768380936574439	81369156.5	333229093.5	7416146.5	cela1_red_19_6792616	cela1_red_19_8039677
LG5.b.1241.20	Male	-884.661457626648	-884.660674415694	5	1241	20	1260	4918	332605563	80745626	6792616	4937	333852624	81992687	8039677	1247061	0.00156642190745515	0.968429528640605	81369156.5	333229093.5	7416146.5	cela1_red_19_6792616	cela1_red_19_8039677
LG5.b.1241.20	Female	-1896.59274849166	-1894.36379341497	5	1241	20	1260	4918	332605563	80745626	6792616	4937	333852624	81992687	8039677	1247061	4.45791015336454	0.0347399749462918	81369156.5	333229093.5	7416146.5	cela1_red_19_6792616	cela1_red_19_8039677
LG5.b.1251.20	Both	-2818.06577971324	-2817.63342848958	5	1251	20	1270	4928	333227445	81367508	7414498	4947	334716220	82856283	8903273	1488775	0.864702447330274	0.352426082329196	82111895.5	333971832.5	8158885.5	cela1_red_19_7414498	cela1_red_19_8903273
LG5.b.1251.20	Male	-884.661290047341	-884.661158013166	5	1251	20	1270	4928	333227445	81367508	7414498	4947	334716220	82856283	8903273	1488775	0.000264068350588786	0.987034802872954	82111895.5	333971832.5	8158885.5	cela1_red_19_7414498	cela1_red_19_8903273
LG5.b.1251.20	Female	-1896.58009216384	-1895.2101294477	5	1251	20	1270	4928	333227445	81367508	7414498	4947	334716220	82856283	8903273	1488775	2.73992543228769	0.0978693336269512	82111895.5	333971832.5	8158885.5	cela1_red_19_7414498	cela1_red_19_8903273
LG5.b.1261.20	Both	-2818.05635089012	-2818.0531343476	5	1261	20	1280	4938	333909514	82049577	8096567	4957	335431114	83571177	9618167	1521600	0.00643308503913431	0.936073008683734	82810377	334670314	8857367	cela1_red_19_8096567	cela1_red_19_9618167
LG5.b.1261.20	Male	-884.661561740353	-884.646030287837	5	1261	20	1280	4938	333909514	82049577	8096567	4957	335431114	83571177	9618167	1521600	0.0310629050325133	0.860100120813714	82810377	334670314	8857367	cela1_red_19_8096567	cela1_red_19_9618167
LG5.b.1261.20	Female	-1896.56811777952	-1896.46293759119	5	1261	20	1280	4938	333909514	82049577	8096567	4957	335431114	83571177	9618167	1521600	0.210360376651352	0.646485091041956	82810377	334670314	8857367	cela1_red_19_8096567	cela1_red_19_9618167
LG5.b.1271.20	Both	-2818.05900035707	-2817.97958202225	5	1271	20	1290	4948	334780911	82920974	8967964	4967	336081524	84221587	10268577	1300613	0.158836669631455	0.690229832649941	83571280.5	335431217.5	9618270.5	cela1_red_19_8967964	cela1_red_19_10268577
LG5.b.1271.20	Male	-884.663741159332	-883.552536780328	5	1271	20	1290	4948	334780911	82920974	8967964	4967	336081524	84221587	10268577	1300613	2.22240875800753	0.136020695763554	83571280.5	335431217.5	9618270.5	cela1_red_19_8967964	cela1_red_19_10268577
LG5.b.1271.20	Female	-1896.56911113439	-1896.43220544148	5	1271	20	1290	4948	334780911	82920974	8967964	4967	336081524	84221587	10268577	1300613	0.27381138582632	0.600786445933408	83571280.5	335431217.5	9618270.5	cela1_red_19_8967964	cela1_red_19_10268577
LG5.b.1281.20	Both	-2818.05323977046	-2818.05324189441	5	1281	20	1300	4958	335495447	83635510	9682500	4977	336716437	84856500	10903490	1220990	-4.24791141995229e-06	1	84246005	336105942	10292995	cela1_red_19_9682500	cela1_red_19_10903490
LG5.b.1281.20	Male	-884.662934096554	-883.516921744172	5	1281	20	1300	4958	335495447	83635510	9682500	4977	336716437	84856500	10903490	1220990	2.29202470476298	0.130040188176962	84246005	336105942	10292995	cela1_red_19_9682500	cela1_red_19_10903490
LG5.b.1281.20	Female	-1896.5663939283	-1896.56639534951	5	1281	20	1300	4958	335495447	83635510	9682500	4977	336716437	84856500	10903490	1220990	-2.84243242276716e-06	1	84246005	336105942	10292995	cela1_red_19_9682500	cela1_red_19_10903490
LG5.b.1291.20	Both	-2818.05398114207	-2818.05398584734	5	1291	20	1310	4968	336116888	84256951	10303941	4987	337630321	85770384	11817374	1513433	-9.41053076530807e-06	1	85013667.5	336873604.5	11060657.5	cela1_red_19_10303941	cela1_red_19_11817374
LG5.b.1291.20	Male	-884.662103788972	-884.122775814766	5	1291	20	1310	4968	336116888	84256951	10303941	4987	337630321	85770384	11817374	1513433	1.07865594841292	0.29899842416177	85013667.5	336873604.5	11060657.5	cela1_red_19_10303941	cela1_red_19_11817374
LG5.b.1291.20	Female	-1896.56671522389	-1896.5651447885	5	1291	20	1310	4968	336116888	84256951	10303941	4987	337630321	85770384	11817374	1513433	0.00314087077822478	0.955307175738313	85013667.5	336873604.5	11060657.5	cela1_red_19_10303941	cela1_red_19_11817374
LG5.b.1301.20	Both	-2818.05691628063	-2817.99991215997	5	1301	20	1320	4978	336760705	84900768	10947758	4997	338531323	86671386	12718376	1770618	0.114008241317606	0.735626155911072	85786077	337646014	11833067	cela1_red_19_10947758	cela1_red_19_12718376
LG5.b.1301.20	Male	-884.662786438086	-883.771605559695	5	1301	20	1320	4978	336760705	84900768	10947758	4997	338531323	86671386	12718376	1770618	1.7823617567833	0.181859583546553	85786077	337646014	11833067	cela1_red_19_10947758	cela1_red_19_12718376
LG5.b.1301.20	Female	-1896.56867254676	-1896.3361196221	5	1301	20	1320	4978	336760705	84900768	10947758	4997	338531323	86671386	12718376	1770618	0.465105849317752	0.495247365287449	85786077	337646014	11833067	cela1_red_19_10947758	cela1_red_19_12718376
LG5.b.1311.20	Both	-2818.06483622517	-2817.29847636952	5	1311	20	1330	4988	337757171	85897234	11944224	5007	339028790	87168853	13215843	1271619	1.53271971130471	0.215704723069428	86533043.5	338392980.5	12580033.5	cela1_red_19_11944224	cela1_red_19_13215843
LG5.b.1311.20	Male	-884.662871859357	-883.510630483093	5	1311	20	1330	4988	337757171	85897234	11944224	5007	339028790	87168853	13215843	1271619	2.30448275252888	0.129001217413916	86533043.5	338392980.5	12580033.5	cela1_red_19_11944224	cela1_red_19_13215843
LG5.b.1311.20	Female	-1896.57330833874	-1895.81908940344	5	1311	20	1330	4988	337757171	85897234	11944224	5007	339028790	87168853	13215843	1271619	1.50843787061376	0.219377608271241	86533043.5	338392980.5	12580033.5	cela1_red_19_11944224	cela1_red_19_13215843
LG5.b.1321.20	Both	-2818.05857728653	-2817.94879523702	5	1321	20	1340	4998	338538486	86678549	12725539	5017	340247381	88387444	14434434	1708895	0.219564099023046	0.63937225391749	87532996.5	339392933.5	13579986.5	cela1_red_19_12725539	cela1_red_19_14434434
LG5.b.1321.20	Male	-884.664353423748	-883.684131189111	5	1321	20	1340	4998	338538486	86678549	12725539	5017	340247381	88387444	14434434	1708895	1.96044446927363	0.161465791259108	87532996.5	339392933.5	13579986.5	cela1_red_19_12725539	cela1_red_19_14434434
LG5.b.1321.20	Female	-1896.56787130744	-1896.41478391156	5	1321	20	1340	4998	338538486	86678549	12725539	5017	340247381	88387444	14434434	1708895	0.306174791764533	0.580037027197101	87532996.5	339392933.5	13579986.5	cela1_red_19_12725539	cela1_red_19_14434434
LG5.b.1331.20	Both	-2818.05350938395	-2818.05351518114	5	1331	20	1350	5008	339056643	87196706	13243696	5027	340813457	88953520	15000510	1756814	-1.15943621494807e-05	1	88075113	339935050	14122103	cela1_red_19_13243696	cela1_red_19_15000510
LG5.b.1331.20	Male	-884.666772936252	-883.244125971764	5	1331	20	1350	5008	339056643	87196706	13243696	5027	340813457	88953520	15000510	1756814	2.8452939289773	0.0916418332092463	88075113	339935050	14122103	cela1_red_19_13243696	cela1_red_19_15000510
LG5.b.1331.20	Female	-1896.56105006928	-1896.56106336948	5	1331	20	1350	5008	339056643	87196706	13243696	5027	340813457	88953520	15000510	1756814	-2.66004003606213e-05	1	88075113	339935050	14122103	cela1_red_19_13243696	cela1_red_19_15000510
LG5.b.1341.20	Both	-2818.06225157105	-2817.90603264066	5	1341	20	1360	5018	340370030	88510093	14557083	5037	341543408	89683471	15730461	1173378	0.312437860785394	0.576188055331807	89096782	340956719	15143772	cela1_red_19_14557083	cela1_red_19_15730461
LG5.b.1341.20	Male	-884.66691551181	-882.004154214374	5	1341	20	1360	5018	340370030	88510093	14557083	5037	341543408	89683471	15730461	1173378	5.32552259487079	0.0210153058716368	89096782	340956719	15143772	cela1_red_19_14557083	cela1_red_19_15730461
LG5.b.1341.20	Female	-1896.57008661202	-1896.45584436275	5	1341	20	1360	5018	340370030	88510093	14557083	5037	341543408	89683471	15730461	1173378	0.228484498546095	0.632649833868937	89096782	340956719	15143772	cela1_red_19_14557083	cela1_red_19_15730461
LG5.b.1351.20	Both	-2818.09131513955	-2815.90822360264	5	1351	20	1370	5028	341102535	89242598	15289588	5047	341921173	90061236	16108226	818638	4.36618307382741	0.0366590193353399	89651917	341511854	15698907	cela1_red_19_15289588	cela1_red_19_16108226
LG5.b.1351.20	Male	-884.669888453904	-877.635957924484	5	1351	20	1370	5028	341102535	89242598	15289588	5047	341921173	90061236	16108226	818638	14.0678610588416	0.00017633121702143	89651917	341511854	15698907	cela1_red_19_15289588	cela1_red_19_16108226
LG5.b.1351.20	Female	-1896.58496532819	-1895.25762964571	5	1351	20	1370	5028	341102535	89242598	15289588	5047	341921173	90061236	16108226	818638	2.65467136494908	0.103246092895654	89651917	341511854	15698907	cela1_red_19_15289588	cela1_red_19_16108226
LG5.b.1361.20	Both	-2818.08982551451	-2815.35730948536	5	1361	20	1380	5038	341566448	89706511	15753501	5057	342736058	90876121	16923111	1169610	5.46503205830686	0.0194006981708951	90291316	342151253	16338306	cela1_red_19_15753501	cela1_red_19_16923111
LG5.b.1361.20	Male	-884.670984254608	-878.365858899126	5	1361	20	1380	5038	341566448	89706511	15753501	5057	342736058	90876121	16923111	1169610	12.6102507109626	0.000383637045318519	90291316	342151253	16338306	cela1_red_19_15753501	cela1_red_19_16923111
LG5.b.1361.20	Female	-1896.58249647715	-1895.16204364412	5	1361	20	1380	5038	341566448	89706511	15753501	5057	342736058	90876121	16923111	1169610	2.840905666043	0.091892406951519	90291316	342151253	16338306	cela1_red_19_15753501	cela1_red_19_16923111
LG5.b.1371.20	Both	-2818.06122698208	-2817.93059915277	5	1371	20	1390	5048	341999296	90139359	16186349	5067	343472725	91612788	17659778	1473429	0.261255658616392	0.60925881003689	90876073.5	342736010.5	16923063.5	cela1_red_19_16186349	cela1_red_19_17659778
LG5.b.1371.20	Male	-884.665125876948	-883.604177304542	5	1371	20	1390	5048	341999296	90139359	16186349	5067	343472725	91612788	17659778	1473429	2.12189714481224	0.145206579409091	90876073.5	342736010.5	16923063.5	cela1_red_19_16186349	cela1_red_19_17659778
LG5.b.1371.20	Female	-1896.57012936115	-1896.39955974846	5	1371	20	1390	5048	341999296	90139359	16186349	5067	343472725	91612788	17659778	1473429	0.341139225384723	0.559172376442545	90876073.5	342736010.5	16923063.5	cela1_red_19_16186349	cela1_red_19_17659778
LG5.b.1381.20	Both	-2818.05752368941	-2818.04501119371	5	1381	20	1400	5058	342777146	90917209	16964199	5077	344283216	92423279	18470269	1506070	0.0250249914161031	0.874304803754658	91670244	343530181	17717234	cela1_red_19_16964199	cela1_red_19_18470269
LG5.b.1381.20	Male	-884.665066251378	-883.044293859453	5	1381	20	1400	5058	342777146	90917209	16964199	5077	344283216	92423279	18470269	1506070	3.2415447838498	0.0717929163844936	91670244	343530181	17717234	cela1_red_19_16964199	cela1_red_19_18470269
LG5.b.1381.20	Female	-1896.56609540257	-1896.56609752912	5	1381	20	1400	5058	342777146	90917209	16964199	5077	344283216	92423279	18470269	1506070	-4.25311645813053e-06	1	91670244	343530181	17717234	cela1_red_19_16964199	cela1_red_19_18470269
LG5.b.1391.20	Both	-2818.05413527152	-2818.05413599407	5	1391	20	1410	5068	343528785	91668848	17715838	5087	345059152	93199215	19246205	1530367	-1.44508703669999e-06	1	92434031.5	344293968.5	18481021.5	cela1_red_19_17715838	cela1_red_19_19246205
LG5.b.1391.20	Male	-884.665378907293	-883.190470274756	5	1391	20	1410	5068	343528785	91668848	17715838	5087	345059152	93199215	19246205	1530367	2.94981726507353	0.0858872690342455	92434031.5	344293968.5	18481021.5	cela1_red_19_17715838	cela1_red_19_19246205
LG5.b.1391.20	Female	-1896.56758604524	-1896.53857234088	5	1391	20	1410	5068	343528785	91668848	17715838	5087	345059152	93199215	19246205	1530367	0.058027408721955	0.809641311319278	92434031.5	344293968.5	18481021.5	cela1_red_19_17715838	cela1_red_19_19246205
LG5.b.1401.20	Both	-2818.06101878925	-2817.70260970047	5	1401	20	1420	5078	344356598	92496661	18543651	5097	345890188	94030251	20077241	1533590	0.716818177563255	0.397189592000754	93263456	345123393	19310446	cela1_red_19_18543651	cela1_red_19_20077241
LG5.b.1401.20	Male	-884.663642202088	-884.09705776703	5	1401	20	1420	5078	344356598	92496661	18543651	5097	345890188	94030251	20077241	1533590	1.13316887011501	0.287100421188293	93263456	345123393	19310446	cela1_red_19_18543651	cela1_red_19_20077241
LG5.b.1401.20	Female	-1896.56984030592	-1896.24386910814	5	1401	20	1420	5078	344356598	92496661	18543651	5097	345890188	94030251	20077241	1533590	0.651942395548303	0.41941907737958	93263456	345123393	19310446	cela1_red_19_18543651	cela1_red_19_20077241
LG5.b.1411.20	Both	-2818.05777502584	-2818.00445290078	5	1411	20	1430	5088	345164615	93304678	19351668	5107	346403910	94543973	20590963	1239295	0.106644250119643	0.743997439426758	93924325.5	345784262.5	19971315.5	cela1_red_19_19351668	cela1_red_19_20590963
LG5.b.1411.20	Male	-884.664299710222	-883.332286133574	5	1411	20	1430	5088	345164615	93304678	19351668	5107	346403910	94543973	20590963	1239295	2.66402715329718	0.102640566230546	93924325.5	345784262.5	19971315.5	cela1_red_19_19351668	cela1_red_19_20590963
LG5.b.1411.20	Female	-1896.56863658212	-1896.47940449186	5	1411	20	1430	5088	345164615	93304678	19351668	5107	346403910	94543973	20590963	1239295	0.178464180526134	0.672696435151686	93924325.5	345784262.5	19971315.5	cela1_red_19_19351668	cela1_red_19_20590963
LG5.b.1421.20	Both	-2818.06068448813	-2817.98889914038	5	1421	20	1440	5098	345905424	94045487	20092477	5117	347075322	95215385	21262375	1169898	0.143570695518974	0.704756748642681	94630436	346490373	20677426	cela1_red_19_20092477	cela1_red_19_21262375
LG5.b.1421.20	Male	-884.663566914652	-883.807545446716	5	1421	20	1440	5098	345905424	94045487	20092477	5117	347075322	95215385	21262375	1169898	1.71204293587289	0.190720524425187	94630436	346490373	20677426	cela1_red_19_20092477	cela1_red_19_21262375
LG5.b.1421.20	Female	-1896.57595550422	-1896.18155318191	5	1421	20	1440	5098	345905424	94045487	20092477	5117	347075322	95215385	21262375	1169898	0.788804644615993	0.374461819599462	94630436	346490373	20677426	cela1_red_19_20092477	cela1_red_19_21262375
LG5.b.1431.20	Both	-2818.08842558707	-2815.53634923653	5	1431	20	1450	5108	346500164	94640227	20687217	5127	347579963	95720026	21767016	1079799	5.10415270108024	0.0238686343201203	95180126.5	347040063.5	21227116.5	cela1_red_19_20687217	cela1_red_19_21767016
LG5.b.1431.20	Male	-884.662456542866	-884.561758836786	5	1431	20	1450	5108	346500164	94640227	20687217	5127	347579963	95720026	21767016	1079799	0.201395412159854	0.653596859339561	95180126.5	347040063.5	21227116.5	cela1_red_19_20687217	cela1_red_19_21767016
LG5.b.1431.20	Female	-1896.59458087332	-1893.28232649729	5	1431	20	1450	5108	346500164	94640227	20687217	5127	347579963	95720026	21767016	1079799	6.62450875205241	0.0100584881238802	95180126.5	347040063.5	21227116.5	cela1_red_19_20687217	cela1_red_19_21767016
LG5.b.1441.20	Both	-2818.0854502942	-2816.58131600736	5	1441	20	1460	5118	347161864	95301927	21348917	5137	348038458	96178521	22225511	876594	3.00826857367156	0.0828407350197254	95740224	347600161	21787214	cela1_red_19_21348917	cela1_red_19_22225511
LG5.b.1441.20	Male	-884.661574499298	-884.652264272752	5	1441	20	1460	5118	347161864	95301927	21348917	5137	348038458	96178521	22225511	876594	0.018620453090989	0.8914601886314	95740224	347600161	21787214	cela1_red_19_21348917	cela1_red_19_22225511
LG5.b.1441.20	Female	-1896.59232769862	-1894.4517233629	5	1441	20	1460	5118	347161864	95301927	21348917	5137	348038458	96178521	22225511	876594	4.28120867142343	0.0385359360568249	95740224	347600161	21787214	cela1_red_19_21348917	cela1_red_19_22225511
LG5.b.1451.20	Both	-2818.06906627292	-2817.52751170166	5	1451	20	1470	5128	347617756	95757819	21804809	5147	348787557	96927620	22974610	1169801	1.08310914251888	0.298003059396711	96342719.5	348202656.5	22389709.5	cela1_red_19_21804809	cela1_red_19_22974610
LG5.b.1451.20	Male	-884.661018099378	-884.661018478369	5	1451	20	1470	5128	347617756	95757819	21804809	5147	348787557	96927620	22974610	1169801	-7.57982206778252e-07	1	96342719.5	348202656.5	22389709.5	cela1_red_19_21804809	cela1_red_19_22974610
LG5.b.1451.20	Female	-1896.57834530762	-1895.80419642777	5	1451	20	1470	5128	347617756	95757819	21804809	5147	348787557	96927620	22974610	1169801	1.54829775968665	0.21338691366387	96342719.5	348202656.5	22389709.5	cela1_red_19_21804809	cela1_red_19_22974610
LG5.b.1461.20	Both	-2818.07517476812	-2816.90457913819	5	1461	20	1480	5138	348171137	96311200	22358190	5157	349532176	97672239	23719229	1361039	2.34119125987763	0.125993171157238	96991719.5	348851656.5	23038709.5	cela1_red_19_22358190	cela1_red_19_23719229
LG5.b.1461.20	Male	-884.660271384549	-884.660272822689	5	1461	20	1480	5138	348171137	96311200	22358190	5157	349532176	97672239	23719229	1361039	-2.87628040496202e-06	1	96991719.5	348851656.5	23038709.5	cela1_red_19_22358190	cela1_red_19_23719229
LG5.b.1461.20	Female	-1896.58036837321	-1895.1773942637	5	1461	20	1480	5138	348171137	96311200	22358190	5157	349532176	97672239	23719229	1361039	2.80594821900922	0.0939153033958873	96991719.5	348851656.5	23038709.5	cela1_red_19_22358190	cela1_red_19_23719229
LG5.b.1471.20	Both	-2818.06520307677	-2817.79127174141	5	1471	20	1490	5148	348862777	97002840	23049830	5167	350056044	98196107	24243097	1193267	0.547862670728136	0.459192323116411	97599473.5	349459410.5	23646463.5	cela1_red_19_23049830	cela1_red_19_24243097
LG5.b.1471.20	Male	-884.661324572249	-884.501378372046	5	1471	20	1490	5148	348862777	97002840	23049830	5167	350056044	98196107	24243097	1193267	0.319892400406161	0.571672315537917	97599473.5	349459410.5	23646463.5	cela1_red_19_23049830	cela1_red_19_24243097
LG5.b.1471.20	Female	-1896.57775265315	-1895.59430119249	5	1471	20	1490	5148	348862777	97002840	23049830	5167	350056044	98196107	24243097	1193267	1.96690292132007	0.160776983474749	97599473.5	349459410.5	23646463.5	cela1_red_19_23049830	cela1_red_19_24243097
LG5.b.1481.20	Both	-2818.06082871794	-2817.70337248276	5	1481	20	1500	5158	349616014	97756077	23803067	5177	350738777	98878840	24925830	1122763	0.714912470358286	0.397817798691081	98317458.5	350177395.5	24364448.5	cela1_red_19_23803067	cela1_red_19_24925830
LG5.b.1481.20	Male	-884.665157450664	-882.656115996569	5	1481	20	1500	5158	349616014	97756077	23803067	5177	350738777	98878840	24925830	1122763	4.0180829081894	0.0450148543955815	98317458.5	350177395.5	24364448.5	cela1_red_19_23803067	cela1_red_19_24925830
LG5.b.1481.20	Female	-1896.57732108184	-1894.53075134295	5	1481	20	1500	5158	349616014	97756077	23803067	5177	350738777	98878840	24925830	1122763	4.09313947778764	0.0430575943022539	98317458.5	350177395.5	24364448.5	cela1_red_19_23803067	cela1_red_19_24925830
LG5.b.1491.20	Both	-2818.06744430027	-2817.37049137322	5	1491	20	1510	5168	350092233	98232296	24279286	5187	351338908	99478971	25525961	1246675	1.39390585411275	0.237746600284341	98855633.5	350715570.5	24902623.5	cela1_red_19_24279286	cela1_red_19_25525961
LG5.b.1491.20	Male	-884.664736548362	-882.98487608476	5	1491	20	1510	5168	350092233	98232296	24279286	5187	351338908	99478971	25525961	1246675	3.35972092720294	0.0668093894159898	98855633.5	350715570.5	24902623.5	cela1_red_19_24279286	cela1_red_19_25525961
LG5.b.1491.20	Female	-1896.5803782511	-1894.82090023553	5	1491	20	1510	5168	350092233	98232296	24279286	5187	351338908	99478971	25525961	1246675	3.5189560311278	0.0606706518857359	98855633.5	350715570.5	24902623.5	cela1_red_19_24279286	cela1_red_19_25525961
LG5.b.1501.20	Both	-2818.05944606107	-2817.7878769575	5	1501	20	1520	5178	350759435	98899498	24946488	5197	352633614	100773677	26820667	1874179	0.543138207140146	0.461135053774328	99836587.5	351696524.5	25883577.5	cela1_red_19_24946488	cela1_red_19_26820667
LG5.b.1501.20	Male	-884.662149827143	-884.416032050883	5	1501	20	1520	5178	350759435	98899498	24946488	5197	352633614	100773677	26820667	1874179	0.49223555251865	0.48293176690509	99836587.5	351696524.5	25883577.5	cela1_red_19_24946488	cela1_red_19_26820667
LG5.b.1501.20	Female	-1896.57152510786	-1896.10642042314	5	1501	20	1520	5178	350759435	98899498	24946488	5197	352633614	100773677	26820667	1874179	0.930209369445492	0.334808526470896	99836587.5	351696524.5	25883577.5	cela1_red_19_24946488	cela1_red_19_26820667
LG5.b.1511.20	Both	-2818.06428921211	-2817.84196276195	5	1511	20	1530	5188	351410848	99550911	25597901	5207	353798022	101938085	27985075	2387174	0.444652900336223	0.504885205779575	100744498	352604435	26791488	cela1_red_19_25597901	cela1_red_19_27985075
LG5.b.1511.20	Male	-884.661681591254	-884.650277900541	5	1511	20	1530	5188	351410848	99550911	25597901	5207	353798022	101938085	27985075	2387174	0.0228073814264462	0.879959048468288	100744498	352604435	26791488	cela1_red_19_25597901	cela1_red_19_27985075
LG5.b.1511.20	Female	-1896.5697181188	-1896.48878290499	5	1511	20	1530	5188	351410848	99550911	25597901	5207	353798022	101938085	27985075	2387174	0.161870427617487	0.68744026563575	100744498	352604435	26791488	cela1_red_19_25597901	cela1_red_19_27985075
LG5.b.1521.20	Both	-2818.07074951927	-2817.42408850376	5	1521	20	1540	5198	352693820	100833883	26880873	5217	354479372	102619435	28666425	1785552	1.29332203103422	0.255436644083892	101726659	353586596	27773649	cela1_red_19_26880873	cela1_red_19_28666425
LG5.b.1521.20	Male	-884.660635010205	-884.660636206472	5	1521	20	1540	5198	352693820	100833883	26880873	5217	354479372	102619435	28666425	1785552	-2.39253427025687e-06	1	101726659	353586596	27773649	cela1_red_19_26880873	cela1_red_19_28666425
LG5.b.1521.20	Female	-1896.57272552349	-1896.36815263143	5	1521	20	1540	5198	352693820	100833883	26880873	5217	354479372	102619435	28666425	1785552	0.409145784129578	0.522403390273613	101726659	353586596	27773649	cela1_red_19_26880873	cela1_red_19_28666425
LG5.b.1531.20	Both	-2818.06890011871	-2816.61044204241	5	1531	20	1550	5208	353848312	101988375	28035365	5227	354933805	103073868	29120858	1085493	2.91691615260333	0.0876552391710421	102531121.5	354391058.5	28578111.5	cela1_red_19_28035365	cela1_red_19_29120858
LG5.b.1531.20	Male	-884.662081311331	-884.370528099372	5	1531	20	1550	5208	353848312	101988375	28035365	5227	354933805	103073868	29120858	1085493	0.583106423916888	0.445097271453611	102531121.5	354391058.5	28578111.5	cela1_red_19_28035365	cela1_red_19_29120858
LG5.b.1531.20	Female	-1896.56718236416	-1896.56185774801	5	1531	20	1550	5208	353848312	101988375	28035365	5227	354933805	103073868	29120858	1085493	0.0106492322997838	0.917808114803363	102531121.5	354391058.5	28578111.5	cela1_red_19_28035365	cela1_red_19_29120858
LG5.b.1541.20	Both	-2818.08639131732	-2814.21547681497	5	1541	20	1560	5218	354681390	102821453	28868443	5237	355440507	103580570	29627560	759117	7.74182900469532	0.0053956123169524	103201011.5	355060948.5	29248001.5	cela1_red_19_28868443	cela1_red_19_29627560
LG5.b.1541.20	Male	-884.662832454924	-884.052990012199	5	1541	20	1560	5218	354681390	102821453	28868443	5237	355440507	103580570	29627560	759117	1.21968488544871	0.26942250223456	103201011.5	355060948.5	29248001.5	cela1_red_19_28868443	cela1_red_19_29627560
LG5.b.1541.20	Female	-1896.58138805824	-1894.10618711127	5	1541	20	1560	5218	354681390	102821453	28868443	5237	355440507	103580570	29627560	759117	4.95040189393967	0.0260846040840167	103201011.5	355060948.5	29248001.5	cela1_red_19_28868443	cela1_red_19_29627560
LG5.b.1551.20	Both	-2818.08204618726	-2815.18582992361	5	1551	20	1570	5228	355009573	103149636	29196626	5247	356123531	104263594	30310584	1113958	5.79243252730703	0.0160953029694129	103706615	355566552	29753605	cela1_red_19_29196626	cela1_red_19_30310584
LG5.b.1551.20	Male	-884.660324222259	-884.66032574238	5	1551	20	1570	5228	355009573	103149636	29196626	5247	356123531	104263594	30310584	1113958	-3.04024047181883e-06	1	103706615	355566552	29753605	cela1_red_19_29196626	cela1_red_19_30310584
LG5.b.1551.20	Female	-1896.58746840232	-1893.29679997516	5	1551	20	1570	5228	355009573	103149636	29196626	5247	356123531	104263594	30310584	1113958	6.58133685430676	0.0103053466845656	103706615	355566552	29753605	cela1_red_19_29196626	cela1_red_19_30310584
LG5.b.1561.20	Both	-2818.06901528836	-2816.19268322322	5	1561	20	1580	5238	355497403	103637466	29684456	5257	356980533	105120596	31167586	1483130	3.75266413028294	0.0527234142389088	104379031	356238968	30426021	cela1_red_19_29684456	cela1_red_19_31167586
LG5.b.1561.20	Male	-884.661471489979	-884.645844255365	5	1561	20	1580	5238	355497403	103637466	29684456	5257	356980533	105120596	31167586	1483130	0.0312544692267238	0.859673865968488	104379031	356238968	30426021	cela1_red_19_29684456	cela1_red_19_31167586
LG5.b.1561.20	Female	-1896.57203588728	-1895.28833627085	5	1561	20	1580	5238	355497403	103637466	29684456	5257	356980533	105120596	31167586	1483130	2.56739923285295	0.109086944628226	104379031	356238968	30426021	cela1_red_19_29684456	cela1_red_19_31167586
LG5.b.1571.20	Both	-2818.09475649462	-2813.87923540832	5	1571	20	1590	5248	356162228	104302291	30349281	5267	357638425	105778488	31825478	1476197	8.43104217258769	0.00368868870053074	105040389.5	356900326.5	31087379.5	cela1_red_19_30349281	cela1_red_19_31825478
LG5.b.1571.20	Male	-884.664873623155	-883.166964414067	5	1571	20	1590	5248	356162228	104302291	30349281	5267	357638425	105778488	31825478	1476197	2.99581841817508	0.0834797224141304	105040389.5	356900326.5	31087379.5	cela1_red_19_30349281	cela1_red_19_31825478
LG5.b.1571.20	Female	-1896.58345208759	-1894.57647900682	5	1571	20	1590	5248	356162228	104302291	30349281	5267	357638425	105778488	31825478	1476197	4.01394616154585	0.0451254161713789	105040389.5	356900326.5	31087379.5	cela1_red_19_30349281	cela1_red_19_31825478
LG5.b.1581.20	Both	-2818.09541854058	-2815.3599984598	5	1581	20	1600	5258	357132825	105272888	31319878	5277	358483036	106623099	32670089	1350211	5.47084016157351	0.0193363278516099	105947993.5	357807930.5	31994983.5	cela1_red_19_31319878	cela1_red_19_32670089
LG5.b.1581.20	Male	-884.664665969103	-883.735191704697	5	1581	20	1600	5258	357132825	105272888	31319878	5277	358483036	106623099	32670089	1350211	1.85894852881347	0.172746204170319	105947993.5	357807930.5	31994983.5	cela1_red_19_31319878	cela1_red_19_32670089
LG5.b.1581.20	Female	-1896.58950558116	-1894.35246140829	5	1581	20	1600	5258	357132825	105272888	31319878	5277	358483036	106623099	32670089	1350211	4.47408834573935	0.0344125564455512	105947993.5	357807930.5	31994983.5	cela1_red_19_31319878	cela1_red_19_32670089
LG5.b.1591.20	Both	-2818.07281201161	-2815.2140231938	5	1591	20	1610	5268	357685787	105825850	31872840	5287	359471226	107611289	33658279	1785439	5.71757763562891	0.016795887227675	106718569.5	358578506.5	32765559.5	cela1_red_19_31872840	cela1_red_19_33658279
LG5.b.1591.20	Male	-884.661218795064	-884.661129767624	5	1591	20	1610	5268	357685787	105825850	31872840	5287	359471226	107611289	33658279	1785439	0.000178054880734635	0.989353567253701	106718569.5	358578506.5	32765559.5	cela1_red_19_31872840	cela1_red_19_33658279
LG5.b.1591.20	Female	-1896.58015061854	-1894.05740435195	5	1591	20	1610	5268	357685787	105825850	31872840	5287	359471226	107611289	33658279	1785439	5.045492533181	0.0246900873190894	106718569.5	358578506.5	32765559.5	cela1_red_19_31872840	cela1_red_19_33658279
LG5.b.1601.20	Both	-2818.06356365831	-2817.28570587308	5	1601	20	1620	5278	358510995	106651058	32698048	5297	360444144	108584207	34631197	1933149	1.55571557045823	0.212293647418221	107617632.5	359477569.5	33664622.5	cela1_red_19_32698048	cela1_red_19_34631197
LG5.b.1601.20	Male	-884.660762558782	-884.660763384405	5	1601	20	1620	5278	358510995	106651058	32698048	5297	360444144	108584207	34631197	1933149	-1.65124583872966e-06	1	107617632.5	359477569.5	33664622.5	cela1_red_19_32698048	cela1_red_19_34631197
LG5.b.1601.20	Female	-1896.57290136831	-1895.87599886777	5	1601	20	1620	5278	358510995	106651058	32698048	5297	360444144	108584207	34631197	1933149	1.39380500108382	0.237763575616709	107617632.5	359477569.5	33664622.5	cela1_red_19_32698048	cela1_red_19_34631197
LG5.b.1611.20	Both	-2818.05202599578	-2818.0520285741	5	1611	20	1630	5288	359545828	107685891	33732881	5307	360910626	109050689	35097679	1364798	-5.15663850819692e-06	1	108368290	360228227	34415280	cela1_red_19_33732881	cela1_red_19_35097679
LG5.b.1611.20	Male	-884.663074221123	-884.102228306352	5	1611	20	1630	5288	359545828	107685891	33732881	5307	360910626	109050689	35097679	1364798	1.12169182954199	0.28955445075867	108368290	360228227	34415280	cela1_red_19_33732881	cela1_red_19_35097679
LG5.b.1611.20	Female	-1896.56319092386	-1896.56320677836	5	1611	20	1630	5288	359545828	107685891	33732881	5307	360910626	109050689	35097679	1364798	-3.1709011636849e-05	1	108368290	360228227	34415280	cela1_red_19_33732881	cela1_red_19_35097679
LG5.b.1621.20	Both	-2818.05878482613	-2817.98841894638	5	1621	20	1640	5298	360486098	108626161	34673151	5317	361383568	109523631	35570621	897470	0.140731759508526	0.707554625385286	109074896	360934833	35121886	cela1_red_19_34673151	cela1_red_19_35570621
LG5.b.1621.20	Male	-884.662661318591	-884.407375163444	5	1621	20	1640	5298	360486098	108626161	34673151	5317	361383568	109523631	35570621	897470	0.510572310294947	0.474891212245823	109074896	360934833	35121886	cela1_red_19_34673151	cela1_red_19_35570621
LG5.b.1621.20	Female	-1896.5690637256	-1896.36099103647	5	1621	20	1640	5298	360486098	108626161	34673151	5317	361383568	109523631	35570621	897470	0.416145378254441	0.518866719154068	109074896	360934833	35121886	cela1_red_19_34673151	cela1_red_19_35570621
LG5.b.1631.20	Both	-2818.06786492343	-2817.44473790009	5	1631	20	1650	5308	360960314	109100377	35147367	5327	361783108	109923171	35970161	822794	1.24625404668859	0.264269141929172	109511774	361371711	35558764	cela1_red_19_35147367	cela1_red_19_35970161
LG5.b.1631.20	Male	-884.664022222656	-883.793752379135	5	1631	20	1650	5308	360960314	109100377	35147367	5327	361783108	109923171	35970161	822794	1.7405396870422	0.187070459356387	109511774	361371711	35558764	cela1_red_19_35147367	cela1_red_19_35970161
LG5.b.1631.20	Female	-1896.56874421332	-1896.46005909922	5	1631	20	1650	5308	360960314	109100377	35147367	5327	361783108	109923171	35970161	822794	0.217370228188884	0.641051019601846	109511774	361371711	35558764	cela1_red_19_35147367	cela1_red_19_35970161
LG5.b.1641.20	Both	-2818.07040072115	-2817.56303111682	5	1641	20	1660	5318	361427952	109568015	35615005	5337	362383937	110524000	36570990	955985	1.01473920866283	0.313770142191875	110046007.5	361905944.5	36092997.5	cela1_red_19_35615005	cela1_red_19_36570990
LG5.b.1641.20	Male	-884.664578513444	-883.64650302437	5	1641	20	1660	5318	361427952	109568015	35615005	5337	362383937	110524000	36570990	955985	2.03615097814804	0.153597875262627	110046007.5	361905944.5	36092997.5	cela1_red_19_35615005	cela1_red_19_36570990
LG5.b.1641.20	Female	-1896.5675405926	-1896.55903006511	5	1641	20	1660	5318	361427952	109568015	35615005	5337	362383937	110524000	36570990	955985	0.0170210549699732	0.896198729103602	110046007.5	361905944.5	36092997.5	cela1_red_19_35615005	cela1_red_19_36570990
LG5.b.1651.20	Both	-2818.07174812003	-2817.17308393358	5	1651	20	1670	5328	361826461	109966524	36013514	5347	363128942	111269005	37315995	1302481	1.79732837290248	0.180035817428355	110617764.5	362477701.5	36664754.5	cela1_red_19_36013514	cela1_red_19_37315995
LG5.b.1651.20	Male	-884.661729780732	-884.542579248483	5	1651	20	1670	5328	361826461	109966524	36013514	5347	363128942	111269005	37315995	1302481	0.238301064497819	0.625435877167248	110617764.5	362477701.5	36664754.5	cela1_red_19_36013514	cela1_red_19_37315995
LG5.b.1651.20	Female	-1896.57076294777	-1896.35489926221	5	1651	20	1670	5328	361826461	109966524	36013514	5347	363128942	111269005	37315995	1302481	0.431727371117177	0.51114256860357	110617764.5	362477701.5	36664754.5	cela1_red_19_36013514	cela1_red_19_37315995
LG5.b.1661.20	Both	-2818.0762343039	-2816.41230334928	5	1661	20	1680	5338	362443173	110583236	36630226	5357	363662592	111802655	37849645	1219419	3.32786190923434	0.0681153688884116	111192945.5	363052882.5	37239935.5	cela1_red_19_36630226	cela1_red_19_37849645
LG5.b.1661.20	Male	-884.661266850142	-884.658033942186	5	1661	20	1680	5338	362443173	110583236	36630226	5357	363662592	111802655	37849645	1219419	0.0064658159121791	0.935910937363472	111192945.5	363052882.5	37239935.5	cela1_red_19_36630226	cela1_red_19_37849645
LG5.b.1661.20	Female	-1896.57300286182	-1896.02615671958	5	1661	20	1680	5338	362443173	110583236	36630226	5357	363662592	111802655	37849645	1219419	1.09369228446758	0.295654563600577	111192945.5	363052882.5	37239935.5	cela1_red_19_36630226	cela1_red_19_37849645
LG5.b.1671.20	Both	-2818.06669159044	-2817.50192181178	5	1671	20	1690	5348	363264208	111404271	37451261	5367	364199366	112339429	38386419	935158	1.12953955733246	0.287873573436917	111871850	363731787	37918840	cela1_red_19_37451261	cela1_red_19_38386419
LG5.b.1671.20	Male	-884.660762625081	-884.660764175699	5	1671	20	1690	5348	363264208	111404271	37451261	5367	364199366	112339429	38386419	935158	-3.10123596136691e-06	1	111871850	363731787	37918840	cela1_red_19_37451261	cela1_red_19_38386419
LG5.b.1671.20	Female	-1896.56984620727	-1896.47687552978	5	1671	20	1690	5348	363264208	111404271	37451261	5367	364199366	112339429	38386419	935158	0.185941354983697	0.666316281242553	111871850	363731787	37918840	cela1_red_19_37451261	cela1_red_19_38386419
LG5.b.1681.20	Both	-2818.0557270668	-2818.05572713282	5	1681	20	1700	5358	363736785	111876848	37923838	5377	365088977	113229040	39276030	1352192	-1.32024069898762e-07	1	112552944	364412881	38599934	cela1_red_19_37923838	cela1_red_19_39276030
LG5.b.1681.20	Male	-884.661030248149	-884.661125952158	5	1681	20	1700	5358	363736785	111876848	37923838	5377	365088977	113229040	39276030	1352192	-0.000191408017599315	1	112552944	364412881	38599934	cela1_red_19_37923838	cela1_red_19_39276030
LG5.b.1681.20	Female	-1896.56611080557	-1896.5661114042	5	1681	20	1700	5358	363736785	111876848	37923838	5377	365088977	113229040	39276030	1352192	-1.19725154945627e-06	1	112552944	364412881	38599934	cela1_red_19_37923838	cela1_red_19_39276030
LG5.b.1691.20	Both	-2818.05245036224	-2818.05245664379	5	1691	20	1710	5368	364319308	112459371	38506361	5387	365700725	113840788	39887778	1381417	-1.25630967886536e-05	1	113150079.5	365010016.5	39197069.5	cela1_red_19_38506361	cela1_red_19_39887778
LG5.b.1691.20	Male	-884.663034676411	-884.400369169095	5	1691	20	1710	5368	364319308	112459371	38506361	5387	365700725	113840788	39887778	1381417	0.525331014633366	0.468576439601465	113150079.5	365010016.5	39197069.5	cela1_red_19_38506361	cela1_red_19_39887778
LG5.b.1691.20	Female	-1896.56509073281	-1896.565093543	5	1691	20	1710	5368	364319308	112459371	38506361	5387	365700725	113840788	39887778	1381417	-5.62038940188359e-06	1	113150079.5	365010016.5	39197069.5	cela1_red_19_38506361	cela1_red_19_39887778
LG5.b.1701.20	Both	-2818.0464979017	-2818.04650524828	5	1701	20	1720	5378	365128004	113268067	39315057	5397	366454821	114594884	40641874	1326817	-1.46931652125204e-05	1	113931475.5	365791412.5	39978465.5	cela1_red_19_39315057	cela1_red_19_40641874
LG5.b.1701.20	Male	-884.66293971918	-884.538800469048	5	1701	20	1720	5378	365128004	113268067	39315057	5397	366454821	114594884	40641874	1326817	0.24827850026486	0.618289855171398	113931475.5	365791412.5	39978465.5	cela1_red_19_39315057	cela1_red_19_40641874
LG5.b.1701.20	Female	-1896.56143196219	-1896.56143688845	5	1701	20	1720	5378	365128004	113268067	39315057	5397	366454821	114594884	40641874	1326817	-9.85252199825482e-06	1	113931475.5	365791412.5	39978465.5	cela1_red_19_39315057	cela1_red_19_40641874
LG5.b.1711.20	Both	-2818.04876243527	-2818.04876753456	5	1711	20	1730	5388	365737946	113878009	39924999	5407	367626728	115766791	41813781	1888782	-1.01985860965215e-05	1	114822400	366682337	40869390	cela1_red_19_39924999	cela1_red_19_41813781
LG5.b.1711.20	Male	-884.661227960237	-884.661227944213	5	1711	20	1730	5388	365737946	113878009	39924999	5407	367626728	115766791	41813781	1888782	3.2048546927399e-08	0.999857161845322	114822400	366682337	40869390	cela1_red_19_39924999	cela1_red_19_41813781
LG5.b.1711.20	Female	-1896.56334530697	-1896.56334815663	5	1711	20	1730	5388	365737946	113878009	39924999	5407	367626728	115766791	41813781	1888782	-5.69932308280841e-06	1	114822400	366682337	40869390	cela1_red_19_39924999	cela1_red_19_41813781
LG5.b.1721.20	Both	-2818.05681100254	-2818.03649684675	5	1721	20	1740	5398	366504748	114644811	40691801	5417	368124690	116264753	42311743	1619942	0.0406283115680708	0.840257076494763	115454782	367314719	41501772	cela1_red_19_40691801	cela1_red_19_42311743
LG5.b.1721.20	Male	-884.661352365351	-884.658910607455	5	1721	20	1740	5398	366504748	114644811	40691801	5417	368124690	116264753	42311743	1619942	0.00488351579156188	0.944287455485795	115454782	367314719	41501772	cela1_red_19_40691801	cela1_red_19_42311743
LG5.b.1721.20	Female	-1896.56633284354	-1896.56443146241	5	1721	20	1740	5398	366504748	114644811	40691801	5417	368124690	116264753	42311743	1619942	0.00380276224950649	0.950828385841078	115454782	367314719	41501772	cela1_red_19_40691801	cela1_red_19_42311743
LG5.b.1731.20	Both	-2818.06334322751	-2817.3626284925	5	1731	20	1750	5408	367692744	115832807	41879797	5427	368733611	116873674	42920664	1040867	1.40142947002187	0.236484377362574	116353240.5	368213177.5	42400230.5	cela1_red_19_41879797	cela1_red_19_42920664
LG5.b.1731.20	Male	-884.661351125869	-884.660819790101	5	1731	20	1750	5408	367692744	115832807	41879797	5427	368733611	116873674	42920664	1040867	0.00106267153682893	0.973994651846583	116353240.5	368213177.5	42400230.5	cela1_red_19_41879797	cela1_red_19_42920664
LG5.b.1731.20	Female	-1896.56749821658	-1896.46178833577	5	1731	20	1750	5408	367692744	115832807	41879797	5427	368733611	116873674	42920664	1040867	0.211419761628804	0.645656878104271	116353240.5	368213177.5	42400230.5	cela1_red_19_41879797	cela1_red_19_42920664
LG5.b.1741.20	Both	-2818.05470422098	-2818.05470432312	5	1741	20	1760	5418	368206665	116346728	42393718	5437	369411532	117551595	43598585	1204867	-2.04298885364551e-07	1	116949161.5	368809098.5	42996151.5	cela1_red_19_42393718	cela1_red_19_43598585
LG5.b.1741.20	Male	-884.659846352491	-884.659848508171	5	1741	20	1760	5418	368206665	116346728	42393718	5437	369411532	117551595	43598585	1204867	-4.31136049883207e-06	1	116949161.5	368809098.5	42996151.5	cela1_red_19_42393718	cela1_red_19_43598585
LG5.b.1741.20	Female	-1896.56464893617	-1896.56465299239	5	1741	20	1760	5418	368206665	116346728	42393718	5437	369411532	117551595	43598585	1204867	-8.11244672149769e-06	1	116949161.5	368809098.5	42996151.5	cela1_red_19_42393718	cela1_red_19_43598585
LG5.b.1751.20	Both	-2818.04813076336	-2818.04813699416	5	1751	20	1770	5428	368906443	117046506	43093496	5447	370223246	118363309	44410299	1316803	-1.24615989989252e-05	1	117704907.5	369564844.5	43751897.5	cela1_red_19_43093496	cela1_red_19_44410299
LG5.b.1751.20	Male	-884.659041876358	-884.659045450472	5	1751	20	1770	5428	368906443	117046506	43093496	5447	370223246	118363309	44410299	1316803	-7.14822795089276e-06	1	117704907.5	369564844.5	43751897.5	cela1_red_19_43093496	cela1_red_19_44410299
LG5.b.1751.20	Female	-1896.56264991438	-1896.56266544221	5	1751	20	1770	5428	368906443	117046506	43093496	5447	370223246	118363309	44410299	1316803	-3.10556602016732e-05	1	117704907.5	369564844.5	43751897.5	cela1_red_19_43093496	cela1_red_19_44410299
LG5.b.1761.20	Both	-2818.05567649523	-2818.05567757497	5	1761	20	1780	5438	369502552	117642615	43689605	5457	370840442	118980505	45027495	1337890	-2.15948057302739e-06	1	118311560	370171497	44358550	cela1_red_19_43689605	cela1_red_19_45027495
LG5.b.1761.20	Male	-884.663866948807	-883.778926470507	5	1761	20	1780	5438	369502552	117642615	43689605	5457	370840442	118980505	45027495	1337890	1.76988095659999	0.183396812281496	118311560	370171497	44358550	cela1_red_19_43689605	cela1_red_19_45027495
LG5.b.1761.20	Female	-1896.56361885506	-1896.56362176785	5	1761	20	1780	5438	369502552	117642615	43689605	5457	370840442	118980505	45027495	1337890	-5.82558686801349e-06	1	118311560	370171497	44358550	cela1_red_19_43689605	cela1_red_19_45027495
LG5.b.1771.20	Both	-2818.06175718036	-2817.96497154884	5	1771	20	1790	5448	370352725	118492788	44539778	5467	371646484	119786547	45833537	1293759	0.193571263037484	0.659960759860996	119139667.5	370999604.5	45186657.5	cela1_red_19_44539778	cela1_red_19_45833537
LG5.b.1771.20	Male	-884.664276172063	-883.749468625908	5	1771	20	1790	5448	370352725	118492788	44539778	5467	371646484	119786547	45833537	1293759	1.82961509230836	0.176173015623873	119139667.5	370999604.5	45186657.5	cela1_red_19_44539778	cela1_red_19_45833537
LG5.b.1771.20	Female	-1896.56406889916	-1896.56407479085	5	1771	20	1790	5448	370352725	118492788	44539778	5467	371646484	119786547	45833537	1293759	-1.17833824333502e-05	1	119139667.5	370999604.5	45186657.5	cela1_red_19_44539778	cela1_red_19_45833537
LG5.b.1781.20	Both	-2818.0748913777	-2817.58509463385	5	1781	20	1800	5458	370963638	119103701	45150691	5477	372461189	120601252	46648242	1497551	0.979593487701095	0.322299188107155	119852476.5	371712413.5	45899466.5	cela1_red_19_45150691	cela1_red_19_46648242
LG5.b.1781.20	Male	-884.662145706724	-884.58305758937	5	1781	20	1800	5458	370963638	119103701	45150691	5477	372461189	120601252	46648242	1497551	0.158176234707753	0.690841193532808	119852476.5	371712413.5	45899466.5	cela1_red_19_45150691	cela1_red_19_46648242
LG5.b.1781.20	Female	-1896.57007448977	-1896.52426490123	5	1781	20	1800	5458	370963638	119103701	45150691	5477	372461189	120601252	46648242	1497551	0.0916191770970727	0.762128711600093	119852476.5	371712413.5	45899466.5	cela1_red_19_45150691	cela1_red_19_46648242
LG5.b.1791.20	Both	-2818.07359957979	-2817.18674242075	5	1791	20	1810	5468	371711696	119851759	45898749	5487	372946965	121087028	47134018	1235269	1.77371431809388	0.182923070139529	120469393.5	372329330.5	46516383.5	cela1_red_19_45898749	cela1_red_19_47134018
LG5.b.1791.20	Male	-884.661858836621	-884.637532533828	5	1791	20	1810	5468	371711696	119851759	45898749	5487	372946965	121087028	47134018	1235269	0.0486526055869945	0.825424648555772	120469393.5	372329330.5	46516383.5	cela1_red_19_45898749	cela1_red_19_47134018
LG5.b.1791.20	Female	-1896.57089807133	-1896.44266948303	5	1791	20	1810	5468	371711696	119851759	45898749	5487	372946965	121087028	47134018	1235269	0.256457176600634	0.612564636751283	120469393.5	372329330.5	46516383.5	cela1_red_19_45898749	cela1_red_19_47134018
LG5.b.1801.20	Both	-2818.05180276585	-2818.05180882636	5	1801	20	1820	5478	372465596	120605659	46652649	5497	373773862	121913925	47960915	1308266	-1.21210168799735e-05	1	121259792	373119729	47306782	cela1_red_19_46652649	cela1_red_19_47960915
LG5.b.1801.20	Male	-884.659672931669	-884.659675261861	5	1801	20	1820	5478	372465596	120605659	46652649	5497	373773862	121913925	47960915	1308266	-4.66038432023197e-06	1	121259792	373119729	47306782	cela1_red_19_46652649	cela1_red_19_47960915
LG5.b.1801.20	Female	-1896.56247685292	-1896.56249644393	5	1801	20	1820	5478	372465596	120605659	46652649	5497	373773862	121913925	47960915	1308266	-3.91820340155391e-05	1	121259792	373119729	47306782	cela1_red_19_46652649	cela1_red_19_47960915
LG5.b.1811.20	Both	-2818.05220598558	-2818.05222164468	5	1811	20	1830	5488	373224126	121364189	47411179	5507	374167076	122307139	48354129	942950	-3.13181972160237e-05	1	121835664	373695601	47882654	cela1_red_19_47411179	cela1_red_19_48354129
LG5.b.1811.20	Male	-884.660879829534	-884.660882711951	5	1811	20	1830	5488	373224126	121364189	47411179	5507	374167076	122307139	48354129	942950	-5.76483398617711e-06	1	121835664	373695601	47882654	cela1_red_19_47411179	cela1_red_19_48354129
LG5.b.1811.20	Female	-1896.56448324442	-1896.56448731957	5	1811	20	1830	5488	373224126	121364189	47411179	5507	374167076	122307139	48354129	942950	-8.15030853118515e-06	1	121835664	373695601	47882654	cela1_red_19_47411179	cela1_red_19_48354129
LG5.b.1821.20	Both	-2818.05028641829	-2818.05029641	5	1821	20	1840	5498	373814526	121954589	48001579	5517	375037381	123177444	49224434	1222855	-1.99834066734184e-05	1	122566016.5	374425953.5	48613006.5	cela1_red_19_48001579	cela1_red_19_49224434
LG5.b.1821.20	Male	-884.663465985035	-884.368313331555	5	1821	20	1840	5498	373814526	121954589	48001579	5517	375037381	123177444	49224434	1222855	0.590305306960545	0.442301082693028	122566016.5	374425953.5	48613006.5	cela1_red_19_48001579	cela1_red_19_49224434
LG5.b.1821.20	Female	-1896.56500770984	-1896.56500838053	5	1821	20	1840	5498	373814526	121954589	48001579	5517	375037381	123177444	49224434	1222855	-1.34139190777205e-06	1	122566016.5	374425953.5	48613006.5	cela1_red_19_48001579	cela1_red_19_49224434
LG5.b.1831.20	Both	-2818.05298468743	-2818.05298743301	5	1831	20	1850	5508	374185741	122325804	48372794	5527	375616348	123756411	49803401	1430607	-5.49115247849841e-06	1	123041107.5	374901044.5	49088097.5	cela1_red_19_48372794	cela1_red_19_49803401
LG5.b.1831.20	Male	-884.663182277571	-884.001824830866	5	1831	20	1850	5508	374185741	122325804	48372794	5527	375616348	123756411	49803401	1430607	1.32271489341156	0.250105392863439	123041107.5	374901044.5	49088097.5	cela1_red_19_48372794	cela1_red_19_49803401
LG5.b.1831.20	Female	-1896.56684698442	-1896.56587316471	5	1831	20	1850	5508	374185741	122325804	48372794	5527	375616348	123756411	49803401	1430607	0.00194763942454301	0.964799131123331	123041107.5	374901044.5	49088097.5	cela1_red_19_48372794	cela1_red_19_49803401
LG5.b.1841.20	Both	-2818.07371658539	-2817.50207721364	5	1841	20	1860	5518	375077873	123217936	49264926	5537	376189413	124329476	50376466	1111540	1.1432787434951	0.284960577076496	123773706	375633643	49820696	cela1_sika_19_49264926	cela1_red_19_50376466
LG5.b.1841.20	Male	-884.661840106304	-884.434025532218	5	1841	20	1860	5518	375077873	123217936	49264926	5537	376189413	124329476	50376466	1111540	0.455629148171511	0.499673812745629	123773706	375633643	49820696	cela1_sika_19_49264926	cela1_red_19_50376466
LG5.b.1841.20	Female	-1896.57701559985	-1896.08366853176	5	1841	20	1860	5518	375077873	123217936	49264926	5537	376189413	124329476	50376466	1111540	0.986694136176993	0.320551700970142	123773706	375633643	49820696	cela1_sika_19_49264926	cela1_red_19_50376466
LG5.b.1851.20	Both	-2818.06260856635	-2817.93398460948	5	1851	20	1870	5528	375632579	123772642	49819632	5547	376695743	124835806	50882796	1063164	0.25724791374796	0.612017210521575	124304224	376164161	50351214	cela1_red_19_49819632	cela1_red_19_50882796
LG5.b.1851.20	Male	-884.660092352538	-884.660095045422	5	1851	20	1870	5528	375632579	123772642	49819632	5547	376695743	124835806	50882796	1063164	-5.3857672810409e-06	1	124304224	376164161	50351214	cela1_red_19_49819632	cela1_red_19_50882796
LG5.b.1851.20	Female	-1896.57028458701	-1896.47625000656	5	1851	20	1870	5528	375632579	123772642	49819632	5547	376695743	124835806	50882796	1063164	0.188069160918985	0.664528520098819	124304224	376164161	50351214	cela1_red_19_49819632	cela1_red_19_50882796
LG5.b.1861.20	Both	-2818.04984995883	-2818.04985272061	5	1861	20	1880	5538	376228031	124368094	50415084	5557	377780136	125920199	51967189	1552105	-5.52354958927026e-06	1	125144146.5	377004083.5	51191136.5	cela1_red_19_50415084	cela1_red_19_51967189
LG5.b.1861.20	Male	-884.658499563228	-884.658503043172	5	1861	20	1880	5538	376228031	124368094	50415084	5557	377780136	125920199	51967189	1552105	-6.9598891059286e-06	1	125144146.5	377004083.5	51191136.5	cela1_red_19_50415084	cela1_red_19_51967189
LG5.b.1861.20	Female	-1896.56517325871	-1896.56517668937	5	1861	20	1880	5538	376228031	124368094	50415084	5557	377780136	125920199	51967189	1552105	-6.8613185248978e-06	1	125144146.5	377004083.5	51191136.5	cela1_red_19_50415084	cela1_red_19_51967189
LG5.b.1871.20	Both	-2818.06114668672	-2817.65209580224	5	1871	20	1890	5548	377036038	125176101	51223091	5567	378428148	126568211	52615201	1392110	0.818101768953056	0.36573574913528	125872156	377732093	51919146	cela1_red_19_51223091	cela1_red_19_52615201
LG5.b.1871.20	Male	-884.659161334715	-884.659163972446	5	1871	20	1890	5548	377036038	125176101	51223091	5567	378428148	126568211	52615201	1392110	-5.2754626267415e-06	1	125872156	377732093	51919146	cela1_red_19_51223091	cela1_red_19_52615201
LG5.b.1871.20	Female	-1896.57476534459	-1894.76654569741	5	1871	20	1890	5548	377036038	125176101	51223091	5567	378428148	126568211	52615201	1392110	3.6164392943524	0.0572111973960518	125872156	377732093	51919146	cela1_red_19_51223091	cela1_red_19_52615201
LG5.b.1881.20	Both	-2818.06563007197	-2817.5851137364	5	1881	20	1900	5558	377904369	126044432	52091422	5577	379512660	127652723	53699713	1608291	0.961032671139947	0.326926834120364	126848577.5	378708514.5	52895567.5	cela1_red_19_52091422	cela1_red_19_53699713
LG5.b.1881.20	Male	-884.659960999379	-884.65996248494	5	1881	20	1900	5558	377904369	126044432	52091422	5577	379512660	127652723	53699713	1608291	-2.97112092084717e-06	1	126848577.5	378708514.5	52895567.5	cela1_red_19_52091422	cela1_red_19_53699713
LG5.b.1881.20	Female	-1896.58198107147	-1894.66758884808	5	1881	20	1900	5558	377904369	126044432	52091422	5577	379512660	127652723	53699713	1608291	3.82878444678272	0.0503794566622534	126848577.5	378708514.5	52895567.5	cela1_red_19_52091422	cela1_red_19_53699713
LG5.b.1891.20	Both	-2818.05902384555	-2817.92284105224	5	1891	20	1910	5568	378498280	126638343	52685333	5587	380286341	128426404	54473394	1788061	0.272365586618434	0.601749313151808	127532373.5	379392310.5	53579363.5	cela1_red_19_52685333	cela1_red_19_54473394
LG5.b.1891.20	Male	-884.659220476703	-884.659222772968	5	1891	20	1910	5568	378498280	126638343	52685333	5587	380286341	128426404	54473394	1788061	-4.59252987639047e-06	1	127532373.5	379392310.5	53579363.5	cela1_red_19_52685333	cela1_red_19_54473394
LG5.b.1891.20	Female	-1896.57451050565	-1895.42008950208	5	1891	20	1910	5568	378498280	126638343	52685333	5587	380286341	128426404	54473394	1788061	2.30884200714354	0.12863985321588	127532373.5	379392310.5	53579363.5	cela1_red_19_52685333	cela1_red_19_54473394
LG5.b.1901.20	Both	-2818.05294866243	-2818.0529520987	5	1901	20	1920	5578	379599652	127739715	53786705	5597	381067365	129207428	55254418	1467713	-6.87254214426503e-06	1	128473571.5	380333508.5	54520561.5	cela1_red_19_53786705	cela1_red_19_55254418
LG5.b.1901.20	Male	-884.658368928452	-884.658373036238	5	1901	20	1920	5578	379599652	127739715	53786705	5597	381067365	129207428	55254418	1467713	-8.21557318886335e-06	1	128473571.5	380333508.5	54520561.5	cela1_red_19_53786705	cela1_red_19_55254418
LG5.b.1901.20	Female	-1896.56506206313	-1896.56506605157	5	1901	20	1920	5578	379599652	127739715	53786705	5597	381067365	129207428	55254418	1467713	-7.9768683463044e-06	1	128473571.5	380333508.5	54520561.5	cela1_red_19_53786705	cela1_red_19_55254418
LG5.b.1909.20	Both	-2818.05014948719	-2818.05017686344	5	1909	20	1928	5586	380243439	128383502	54430492	5605	381975639	130115702	56162692	1732200	-5.47524869034532e-05	1	129249602	381109539	55296592	cela1_red_19_54430492	cela1_red_19_56162692
LG5.b.1909.20	Male	-884.661107174422	-884.66110736228	5	1909	20	1928	5586	380243439	128383502	54430492	5605	381975639	130115702	56162692	1732200	-3.75715217160177e-07	1	129249602	381109539	55296592	cela1_red_19_54430492	cela1_red_19_56162692
LG5.b.1909.20	Female	-1896.56442232025	-1896.56443006988	5	1909	20	1928	5586	380243439	128383502	54430492	5605	381975639	130115702	56162692	1732200	-1.5499248092965e-05	1	129249602	381109539	55296592	cela1_red_19_54430492	cela1_red_19_56162692
LG6.b.1.20	Both	-2818.04379976127	-2818.04380671555	6	1	20	20	5717	389802788	1033920	68432011	5736	391979831	3210963	70609054	2177043	-1.39085586852161e-05	1	2122441.5	390891309.5	69520532.5	cela1_red_6_68432011	cela1_red_6_70609054
LG6.b.1.20	Male	-884.662795752322	-883.99965468251	6	1	20	20	5717	389802788	1033920	68432011	5736	391979831	3210963	70609054	2177043	1.32628213962312	0.249467707487285	2122441.5	390891309.5	69520532.5	cela1_red_6_68432011	cela1_red_6_70609054
LG6.b.1.20	Female	-1896.55764060584	-1896.55764689019	6	1	20	20	5717	389802788	1033920	68432011	5736	391979831	3210963	70609054	2177043	-1.25686983665219e-05	1	2122441.5	390891309.5	69520532.5	cela1_red_6_68432011	cela1_red_6_70609054
LG6.b.11.20	Both	-2818.04819421373	-2818.04819944028	6	11	20	30	5727	390423851	1654983	69053074	5746	392861460	4092592	71490683	2437609	-1.04530872704345e-05	1	2873787.5	391642655.5	70271878.5	cela1_red_6_69053074	cela1_red_6_71490683
LG6.b.11.20	Male	-884.660121438714	-884.660122986106	6	11	20	30	5727	390423851	1654983	69053074	5746	392861460	4092592	71490683	2437609	-3.09478468807356e-06	1	2873787.5	391642655.5	70271878.5	cela1_red_6_69053074	cela1_red_6_71490683
LG6.b.11.20	Female	-1896.56073987004	-1896.56074470647	6	11	20	30	5727	390423851	1654983	69053074	5746	392861460	4092592	71490683	2437609	-9.67284631769871e-06	1	2873787.5	391642655.5	70271878.5	cela1_red_6_69053074	cela1_red_6_71490683
LG6.b.21.20	Both	-2818.05622222138	-2818.05586048297	6	21	20	40	5737	392013528	3244660	70642751	5756	393688943	4920075	72318166	1675415	0.00072347682180407	0.978541468003201	4082367.5	392851235.5	71480458.5	cela1_red_6_70642751	cela1_red_6_72318166
LG6.b.21.20	Male	-884.658877311964	-884.658880750225	6	21	20	40	5737	392013528	3244660	70642751	5756	393688943	4920075	72318166	1675415	-6.87652072883793e-06	1	4082367.5	392851235.5	71480458.5	cela1_red_6_70642751	cela1_red_6_72318166
[truncated: 8,683 more rows]
