# Supplementary material
Source: publisher figshare collection journal article supplement (https://gsajournals.figshare.com/articles/dataset/_/6166364)
Supplement: Supplementary file 1 [file 1 › TableS5_Cervus_ACC_Regional_Heritability_Results_sig_Region.txt]

Analysis.ID	RRID.Sex	model1.Li	model2.Li	CEL.LG	Start.Order	Window.Size	Stop.Order	Start.Cumu.Order	Start.Cumu.Position	Start.Position	Start.BTA.Position	Stop.Cumu.Order	Stop.Cumu.Position	Stop.Position	Stop.BTA.Position	Window.Bp	Chi2	P	Mid.Position	Mid.Cumu.Position	Mid.BTA.Position	Start.SNP.Name	Stop.SNP.Name
LG12.c.241.6	Both	-2818.06151689983	-2816.03372240437	12	241	6	246	12017	823245831	16723795	16424253	12022	823654578	17132542	16833000	408747	4.05558899092557	0.044025358214662	16928168.5	823450204.5	16628626.5	cela1_red_10_16424253	cela1_red_10_16833000
LG12.c.241.6	Male	-884.662136921192	-884.350385229903	12	241	6	246	12017	823245831	16723795	16424253	12022	823654578	17132542	16833000	408747	0.623503382578292	0.429748378698717	16928168.5	823450204.5	16628626.5	cela1_red_10_16424253	cela1_red_10_16833000
LG12.c.241.6	Female	-1896.57011621023	-1894.87437809454	12	241	6	246	12017	823245831	16723795	16424253	12022	823654578	17132542	16833000	408747	3.39147623137023	0.065534250521521	16928168.5	823450204.5	16628626.5	cela1_red_10_16424253	cela1_red_10_16833000
LG12.c.242.6	Both	-2818.06798723262	-2814.129042149	12	242	6	247	12018	823314234	16792198	16492656	12023	823722824	17200788	16901246	408590	7.87789016725401	0.00500428291385691	16996493	823518529	16696951	cela1_red_10_16492656	cela1_red_10_16901246
LG12.c.242.6	Male	-884.661732024328	-884.487339547656	12	242	6	247	12018	823314234	16792198	16492656	12023	823722824	17200788	16901246	408590	0.348784953344193	0.554801745646163	16996493	823518529	16696951	cela1_red_10_16492656	cela1_red_10_16901246
LG12.c.242.6	Female	-1896.57625075082	-1892.67979744944	12	242	6	247	12018	823314234	16792198	16492656	12023	823722824	17200788	16901246	408590	7.79290660276547	0.00524517466817254	16996493	823518529	16696951	cela1_red_10_16492656	cela1_red_10_16901246
LG12.c.243.6	Both	-2818.06374408704	-2815.3538738159	12	243	6	248	12019	823383174	16861138	16561596	12024	823745758	17223722	16924180	362584	5.41974054229013	0.0199103184508225	17042430	823564466	16742888	cela1_red_10_16561596	cela1_red_10_16924180
LG12.c.243.6	Male	-884.661804918863	-884.4709491616	12	243	6	248	12019	823383174	16861138	16561596	12024	823745758	17223722	16924180	362584	0.381711514526387	0.536688683150578	17042430	823564466	16742888	cela1_red_10_16561596	cela1_red_10_16924180
LG12.c.243.6	Female	-1896.57273538179	-1894.06759214644	12	243	6	248	12019	823383174	16861138	16561596	12024	823745758	17223722	16924180	362584	5.01028647069234	0.0251971373679769	17042430	823564466	16742888	cela1_red_10_16561596	cela1_red_10_16924180
LG12.c.244.6	Both	-2818.06011083357	-2817.68724008038	12	244	6	249	12020	823499653	16977617	16678075	12025	823783238	17261202	16961660	283585	0.745741506382728	0.387827853426037	17119409.5	823641445.5	16819867.5	cela1_red_10_16678075	cela1_red_10_16961660
LG12.c.244.6	Male	-884.660561812158	-884.6605623564	12	244	6	249	12020	823499653	16977617	16678075	12025	823783238	17261202	16961660	283585	-1.08848416857654e-06	1	17119409.5	823641445.5	16819867.5	cela1_red_10_16678075	cela1_red_10_16961660
LG12.c.244.6	Female	-1896.57174456281	-1895.72739390097	12	244	6	249	12020	823499653	16977617	16678075	12025	823783238	17261202	16961660	283585	1.68870132368056	0.193772251781832	17119409.5	823641445.5	16819867.5	cela1_red_10_16678075	cela1_red_10_16961660
LG12.c.245.6	Both	-2818.06055962964	-2817.51506204469	12	245	6	250	12021	823565535	17043499	16743957	12026	823800695	17278659	16979117	235160	1.090995169895	0.296250816564915	17161079	823683115	16861537	cela1_red_10_16743957	cela1_red_10_16979117
LG12.c.245.6	Male	-884.661109894807	-884.638125042949	12	245	6	250	12021	823565535	17043499	16743957	12026	823800695	17278659	16979117	235160	0.0459697037169917	0.830230879767129	17161079	823683115	16861537	cela1_red_10_16743957	cela1_red_10_16979117
LG12.c.245.6	Female	-1896.5717330437	-1895.6292375512	12	245	6	250	12021	823565535	17043499	16743957	12026	823800695	17278659	16979117	235160	1.88499098499824	0.169767972353564	17161079	823683115	16861537	cela1_red_10_16743957	cela1_red_10_16979117
LG12.c.246.6	Both	-2818.05684828757	-2817.61035392787	12	246	6	251	12022	823654578	17132542	16833000	12027	823992526	17470490	17170948	337948	0.892988719399	0.344668676411385	17301516	823823552	17001974	cela1_red_10_16833000	cela1_red_10_17170948
LG12.c.246.6	Male	-884.661808852671	-884.447121655165	12	246	6	251	12022	823654578	17132542	16833000	12027	823992526	17470490	17170948	337948	0.429374395011337	0.512296082819253	17301516	823823552	17001974	cela1_red_10_16833000	cela1_red_10_17170948
LG12.c.246.6	Female	-1896.56874652076	-1895.82189451959	12	246	6	251	12022	823654578	17132542	16833000	12027	823992526	17470490	17170948	337948	1.49370400235921	0.221642651138668	17301516	823823552	17001974	cela1_red_10_16833000	cela1_red_10_17170948
LG12.c.247.6	Both	-2818.05829174684	-2816.85785065236	12	247	6	252	12023	823722824	17200788	16901246	12028	824141220	17619184	17319642	418396	2.40088218896017	0.121266847066126	17409986	823932022	17110444	cela1_red_10_16901246	cela1_red_10_17319642
LG12.c.247.6	Male	-884.66256842854	-884.267477896276	12	247	6	252	12023	823722824	17200788	16901246	12028	824141220	17619184	17319642	418396	0.790181064527133	0.374045381182562	17409986	823932022	17110444	cela1_red_10_16901246	cela1_red_10_17319642
LG12.c.247.6	Female	-1896.56893060153	-1894.96559789909	12	247	6	252	12023	823722824	17200788	16901246	12028	824141220	17619184	17319642	418396	3.20666540487127	0.0733388085457796	17409986	823932022	17110444	cela1_red_10_16901246	cela1_red_10_17319642
LG12.c.248.6	Both	-2818.05275292801	-2818.05276672471	12	248	6	253	12024	823745758	17223722	16924180	12029	824338234	17816198	17516656	592476	-2.75933871307643e-05	1	17519960	824041996	17220418	cela1_red_10_16924180	cela1_red_10_17516656
LG12.c.248.6	Male	-884.662502538703	-884.207637005869	12	248	6	253	12024	823745758	17223722	16924180	12029	824338234	17816198	17516656	592476	0.909731065667984	0.340185784974873	17519960	824041996	17220418	cela1_red_10_16924180	cela1_red_10_17516656
LG12.c.248.6	Female	-1896.56389837361	-1896.56390419399	12	248	6	253	12024	823745758	17223722	16924180	12029	824338234	17816198	17516656	592476	-1.16407582027023e-05	1	17519960	824041996	17220418	cela1_red_10_16924180	cela1_red_10_17516656
LG12.c.249.6	Both	-2818.0525750508	-2818.05261401603	12	249	6	254	12025	823783238	17261202	16961660	12030	824367973	17845937	17546395	584735	-7.79304591560503e-05	1	17553569.5	824075605.5	17254027.5	cela1_red_10_16961660	cela1_red_10_17546395
LG12.c.249.6	Male	-884.663278559259	-883.916344535142	12	249	6	254	12025	823783238	17261202	16961660	12030	824367973	17845937	17546395	584735	1.49386804823394	0.221617278848482	17553569.5	824075605.5	17254027.5	cela1_red_10_16961660	cela1_red_10_17546395
LG12.c.249.6	Female	-1896.56372223141	-1896.56374171238	12	249	6	254	12025	823783238	17261202	16961660	12030	824367973	17845937	17546395	584735	-3.89619399356889e-05	1	17553569.5	824075605.5	17254027.5	cela1_red_10_16961660	cela1_red_10_17546395
LG12.c.250.6	Both	-2818.05286870015	-2818.05287222784	12	250	6	255	12026	823800695	17278659	16979117	12031	824524667	18002631	17703089	723972	-7.05537604517303e-06	1	17640645	824162681	17341103	cela1_red_10_16979117	cela1_red_10_17703089
LG12.c.250.6	Male	-884.663529865489	-883.767851522605	12	250	6	255	12026	823800695	17278659	16979117	12031	824524667	18002631	17703089	723972	1.7913566857676	0.180760951645217	17640645	824162681	17341103	cela1_red_10_16979117	cela1_red_10_17703089
LG12.c.250.6	Female	-1896.56386636288	-1896.56389998361	12	250	6	255	12026	823800695	17278659	16979117	12031	824524667	18002631	17703089	723972	-6.72414553264389e-05	1	17640645	824162681	17341103	cela1_red_10_16979117	cela1_red_10_17703089
LG12.c.251.6	Both	-2818.05311275106	-2818.05314581989	12	251	6	256	12027	823992526	17470490	17170948	12032	824753022	18230986	17931444	760496	-6.61376489006216e-05	1	17850738	824372774	17551196	cela1_red_10_17170948	cela1_red_10_17931444
LG12.c.251.6	Male	-884.663083122983	-883.987127923705	12	251	6	256	12027	823992526	17470490	17170948	12032	824753022	18230986	17931444	760496	1.35191039855613	0.244944415853406	17850738	824372774	17551196	cela1_red_10_17170948	cela1_red_10_17931444
LG12.c.251.6	Female	-1896.56423658976	-1896.56424601312	12	251	6	256	12027	823992526	17470490	17170948	12032	824753022	18230986	17931444	760496	-1.88467270163528e-05	1	17850738	824372774	17551196	cela1_red_10_17170948	cela1_red_10_17931444
LG12.c.252.6	Both	-2818.05309719071	-2818.05313372422	12	252	6	257	12028	824141220	17619184	17319642	12033	824841684	18319648	18020106	700464	-7.3067032644758e-05	1	17969416	824491452	17669874	cela1_red_10_17319642	cela1_red_10_18020106
LG12.c.252.6	Male	-884.662564839424	-884.184372628543	12	252	6	257	12028	824141220	17619184	17319642	12033	824841684	18319648	18020106	700464	0.956384421760731	0.328099504326611	17969416	824491452	17669874	cela1_red_10_17319642	cela1_red_10_18020106
LG12.c.252.6	Female	-1896.56439226453	-1896.56439899734	12	252	6	257	12028	824141220	17619184	17319642	12033	824841684	18319648	18020106	700464	-1.34656074806117e-05	1	17969416	824491452	17669874	cela1_red_10_17319642	cela1_red_10_18020106
LG12.c.253.6	Both	-2818.05163712697	-2818.05164600819	12	253	6	258	12029	824338234	17816198	17516656	12034	824963435	18441399	18141857	625201	-1.77624333446147e-05	1	18128798.5	824650834.5	17829256.5	cela1_red_10_17516656	cela1_red_10_18141857
LG12.c.253.6	Male	-884.661879662381	-884.516664490985	12	253	6	258	12029	824338234	17816198	17516656	12034	824963435	18441399	18141857	625201	0.290430342791069	0.589944888425395	18128798.5	824650834.5	17829256.5	cela1_red_10_17516656	cela1_red_10_18141857
LG12.c.253.6	Female	-1896.56423977386	-1896.56424586393	12	253	6	258	12029	824338234	17816198	17516656	12034	824963435	18441399	18141857	625201	-1.21801440400304e-05	1	18128798.5	824650834.5	17829256.5	cela1_red_10_17516656	cela1_red_10_18141857
LG12.c.254.6	Both	-2818.05337678922	-2818.05338227631	12	254	6	259	12030	824367973	17845937	17546395	12035	825009010	18486974	18187432	641037	-1.09741849882994e-05	1	18166455.5	824688491.5	17866913.5	cela1_red_10_17546395	cela1_red_10_18187432
LG12.c.254.6	Male	-884.662649609669	-884.278629428207	12	254	6	259	12030	824367973	17845937	17546395	12035	825009010	18486974	18187432	641037	0.76804036292333	0.38082396524777	18166455.5	824688491.5	17866913.5	cela1_red_10_17546395	cela1_red_10_18187432
LG12.c.254.6	Female	-1896.5640642843	-1896.56407116647	12	254	6	259	12030	824367973	17845937	17546395	12035	825009010	18486974	18187432	641037	-1.37643428388401e-05	1	18166455.5	824688491.5	17866913.5	cela1_red_10_17546395	cela1_red_10_18187432
LG12.c.255.6	Both	-2818.05748692994	-2818.02225466909	12	255	6	260	12031	824524667	18002631	17703089	12036	825146627	18624591	18325049	621960	0.0704645217056168	0.790661634201479	18313611	824835647	18014069	cela1_red_10_17703089	cela1_red_10_18325049
LG12.c.255.6	Male	-884.66241605881	-884.368616875969	12	255	6	260	12031	824524667	18002631	17703089	12036	825146627	18624591	18325049	621960	0.587598365683334	0.443349321361532	18313611	824835647	18014069	cela1_red_10_17703089	cela1_red_10_18325049
LG12.c.255.6	Female	-1896.56629508771	-1896.5662957409	12	255	6	260	12031	824524667	18002631	17703089	12036	825146627	18624591	18325049	621960	-1.30639091366902e-06	1	18313611	824835647	18014069	cela1_red_10_17703089	cela1_red_10_18325049
LG12.c.256.6	Both	-2818.05820380229	-2817.97980614955	12	256	6	261	12032	824753022	18230986	17931444	12037	825167634	18645598	18346056	414612	0.156795305477317	0.692124305011989	18438292	824960328	18138750	cela1_red_10_17931444	cela1_red_10_18346056
LG12.c.256.6	Male	-884.662457295849	-884.304797175715	12	256	6	261	12032	824753022	18230986	17931444	12037	825167634	18645598	18346056	414612	0.715320240267829	0.397683258714112	18438292	824960328	18138750	cela1_red_10_17931444	cela1_red_10_18346056
LG12.c.256.6	Female	-1896.56739527171	-1896.54564191353	12	256	6	261	12032	824753022	18230986	17931444	12037	825167634	18645598	18346056	414612	0.04350671635666	0.834774066299452	18438292	824960328	18138750	cela1_red_10_17931444	cela1_red_10_18346056
LG12.c.257.6	Both	-2818.05909398835	-2817.92878172037	12	257	6	262	12033	824841684	18319648	18020106	12038	825198923	18676887	18377345	357239	0.260624535968418	0.60969141459781	18498267.5	825020303.5	18198725.5	cela1_red_10_18020106	cela1_red_10_18377345
LG12.c.257.6	Male	-884.661982431517	-884.453632528017	12	257	6	262	12033	824841684	18319648	18020106	12038	825198923	18676887	18377345	357239	0.416699807000441	0.518588386809151	18498267.5	825020303.5	18198725.5	cela1_red_10_18020106	cela1_red_10_18377345
LG12.c.257.6	Female	-1896.56812725421	-1896.50801394213	12	257	6	262	12033	824841684	18319648	18020106	12038	825198923	18676887	18377345	357239	0.120226624175302	0.728788827241251	18498267.5	825020303.5	18198725.5	cela1_red_10_18020106	cela1_red_10_18377345
LG12.c.258.6	Both	-2818.05887716237	-2817.92895021588	12	258	6	263	12034	824963435	18441399	18141857	12039	825290045	18768009	18468467	326610	0.259853892979663	0.610220550028474	18604704	825126740	18305162	cela1_red_10_18141857	cela1_red_10_18468467
LG12.c.258.6	Male	-884.662605641828	-884.26561535358	12	258	6	263	12034	824963435	18441399	18141857	12039	825290045	18768009	18468467	326610	0.793980576496779	0.372899194094282	18604704	825126740	18305162	cela1_red_10_18141857	cela1_red_10_18468467
LG12.c.258.6	Female	-1896.56795206618	-1896.49666132024	12	258	6	263	12034	824963435	18441399	18141857	12039	825290045	18768009	18468467	326610	0.142581491885721	0.705728028466844	18604704	825126740	18305162	cela1_red_10_18141857	cela1_red_10_18468467
LG12.c.259.6	Both	-2818.06032807001	-2817.85966817851	12	259	6	264	12035	825009010	18486974	18187432	12040	825354377	18832341	18532799	345367	0.40131978298723	0.526408451983327	18659657.5	825181693.5	18360115.5	cela1_red_10_18187432	cela1_red_10_18532799
LG12.c.259.6	Male	-884.662690022745	-884.234304240047	12	259	6	264	12035	825009010	18486974	18187432	12040	825354377	18832341	18532799	345367	0.85677156539623	0.354643725894309	18659657.5	825181693.5	18360115.5	cela1_red_10_18187432	cela1_red_10_18532799
LG12.c.259.6	Female	-1896.56869491399	-1896.43341881674	12	259	6	264	12035	825009010	18486974	18187432	12040	825354377	18832341	18532799	345367	0.270552194508582	0.60296159592468	18659657.5	825181693.5	18360115.5	cela1_red_10_18187432	cela1_red_10_18532799
LG12.c.260.6	Both	-2818.05824025651	-2817.95140473289	12	260	6	265	12036	825146627	18624591	18325049	12041	825502708	18980672	18681130	356081	0.213671047245953	0.643905165253095	18802631.5	825324667.5	18503089.5	cela1_red_10_18325049	cela1_red_10_18681130
LG12.c.260.6	Male	-884.661962991674	-884.434720249993	12	260	6	265	12036	825146627	18624591	18325049	12041	825502708	18980672	18681130	356081	0.45448548336276	0.500212530700477	18802631.5	825324667.5	18503089.5	cela1_red_10_18325049	cela1_red_10_18681130
LG12.c.260.6	Female	-1896.56836773032	-1896.42255882328	12	260	6	265	12036	825146627	18624591	18325049	12041	825502708	18980672	18681130	356081	0.291617814070833	0.589185657447813	18802631.5	825324667.5	18503089.5	cela1_red_10_18325049	cela1_red_10_18681130
LG12.c.261.6	Both	-2818.05415518834	-2818.05415834138	12	261	6	266	12037	825167634	18645598	18346056	12042	825535388	19013352	18713810	367754	-6.30606609774986e-06	1	18829475	825351511	18529933	cela1_red_10_18346056	cela1_red_10_18713810
LG12.c.261.6	Male	-884.662661064571	-884.113564266471	12	261	6	266	12037	825167634	18645598	18346056	12042	825535388	19013352	18713810	367754	1.09819359619951	0.294662876448575	18829475	825351511	18529933	cela1_red_10_18346056	cela1_red_10_18713810
LG12.c.261.6	Female	-1896.5667580241	-1896.54351945066	12	261	6	266	12037	825167634	18645598	18346056	12042	825535388	19013352	18713810	367754	0.0464771468768959	0.829310788721554	18829475	825351511	18529933	cela1_red_10_18346056	cela1_red_10_18713810
LG12.c.262.6	Both	-2818.05322264191	-2818.05322767534	12	262	6	267	12038	825198923	18676887	18377345	12043	825537815	19015779	18716237	338892	-1.00668557934114e-05	1	18846333	825368369	18546791	cela1_red_10_18377345	cela1_red_10_18716237
LG12.c.262.6	Male	-884.66237184372	-884.27986598379	12	262	6	267	12038	825198923	18676887	18377345	12043	825537815	19015779	18716237	338892	0.765011719860468	0.381764654210981	18846333	825368369	18546791	cela1_red_10_18377345	cela1_red_10_18716237
LG12.c.262.6	Female	-1896.5656466551	-1896.56564777592	12	262	6	267	12038	825198923	18676887	18377345	12043	825537815	19015779	18716237	338892	-2.2416402316594e-06	1	18846333	825368369	18546791	cela1_red_10_18377345	cela1_red_10_18716237
LG12.c.263.6	Both	-2818.05425123909	-2818.05425458005	12	263	6	268	12039	825290045	18768009	18468467	12044	825573774	19051738	18752196	283729	-6.68193115416216e-06	1	18909873.5	825431909.5	18610331.5	cela1_red_10_18468467	cela1_red_10_18752196
LG12.c.263.6	Male	-884.662728062479	-884.104757542988	12	263	6	268	12039	825290045	18768009	18468467	12044	825573774	19051738	18752196	283729	1.11594103898301	0.290794134976051	18909873.5	825431909.5	18610331.5	cela1_red_10_18468467	cela1_red_10_18752196
LG12.c.263.6	Female	-1896.5655948094	-1896.56559788864	12	263	6	268	12039	825290045	18768009	18468467	12044	825573774	19051738	18752196	283729	-6.15847693552496e-06	1	18909873.5	825431909.5	18610331.5	cela1_red_10_18468467	cela1_red_10_18752196
LG12.c.264.6	Both	-2818.0577090302	-2818.01832748384	12	264	6	269	12040	825354377	18832341	18532799	12045	825600940	19078904	18779362	246563	0.0787630927306964	0.77898067939312	18955622.5	825477658.5	18656080.5	cela1_red_10_18532799	cela1_red_10_18779362
LG12.c.264.6	Male	-884.662150078265	-884.309323146287	12	264	6	269	12040	825354377	18832341	18532799	12045	825600940	19078904	18779362	246563	0.705653863955831	0.400890410407641	18955622.5	825477658.5	18656080.5	cela1_red_10_18532799	cela1_red_10_18779362
LG12.c.264.6	Female	-1896.56722915633	-1896.55074341379	12	264	6	269	12040	825354377	18832341	18532799	12045	825600940	19078904	18779362	246563	0.0329714850795426	0.855911937833744	18955622.5	825477658.5	18656080.5	cela1_red_10_18532799	cela1_red_10_18779362
LG12.c.265.6	Both	-2818.05878592567	-2817.96160853132	12	265	6	270	12041	825502708	18980672	18681130	12046	825641365	19119329	18819787	138657	0.194354788704914	0.659316612049617	19050000.5	825572036.5	18750458.5	cela1_red_10_18681130	cela1_red_10_18819787
LG12.c.265.6	Male	-884.66278655842	-883.994127789857	12	265	6	270	12041	825502708	18980672	18681130	12046	825641365	19119329	18819787	138657	1.33731753712618	0.247507580455672	19050000.5	825572036.5	18750458.5	cela1_red_10_18681130	cela1_red_10_18819787
LG12.c.265.6	Female	-1896.56694630748	-1896.55954504575	12	265	6	270	12041	825502708	18980672	18681130	12046	825641365	19119329	18819787	138657	0.0148025234657325	0.903163840953273	19050000.5	825572036.5	18750458.5	cela1_red_10_18681130	cela1_red_10_18819787
LG12.c.266.6	Both	-2818.05851761499	-2817.98860298452	12	266	6	271	12042	825535388	19013352	18713810	12047	825692791	19170755	18871213	157403	0.139829260940132	0.708450809024798	19092053.5	825614089.5	18792511.5	cela1_red_10_18713810	cela1_red_10_18871213
LG12.c.266.6	Male	-884.663026383369	-883.964317583567	12	266	6	271	12042	825535388	19013352	18713810	12047	825692791	19170755	18871213	157403	1.39741759960407	0.237156427547647	19092053.5	825614089.5	18792511.5	cela1_red_10_18713810	cela1_red_10_18871213
LG12.c.266.6	Female	-1896.56625376294	-1896.56625521967	12	266	6	271	12042	825535388	19013352	18713810	12047	825692791	19170755	18871213	157403	-2.91346123049152e-06	1	19092053.5	825614089.5	18792511.5	cela1_red_10_18713810	cela1_red_10_18871213
LG12.c.267.6	Both	-2818.05836861797	-2817.99480503473	12	267	6	272	12043	825537815	19015779	18716237	12048	825736758	19214722	18915180	198943	0.127127166478203	0.721429487266335	19115250.5	825637286.5	18815708.5	cela1_red_10_18716237	cela1_red_10_18915180
LG12.c.267.6	Male	-884.662546231935	-884.414549295325	12	267	6	272	12043	825537815	19015779	18716237	12048	825736758	19214722	18915180	198943	0.495993873220868	0.481265688365726	19115250.5	825637286.5	18815708.5	cela1_red_10_18716237	cela1_red_10_18915180
LG12.c.267.6	Female	-1896.56615673128	-1896.56615765934	12	267	6	272	12043	825537815	19015779	18716237	12048	825736758	19214722	18915180	198943	-1.85612225322984e-06	1	19115250.5	825637286.5	18815708.5	cela1_red_10_18716237	cela1_red_10_18915180
LG12.c.268.6	Both	-2818.0634074765	-2816.01046817437	12	268	6	273	12044	825573774	19051738	18752196	12049	825921011	19398975	19099433	347237	4.10587860426222	0.0427343819597972	19225356.5	825747392.5	18925814.5	cela1_red_10_18752196	cela1_red_10_19099433
LG12.c.268.6	Male	-884.662696931069	-884.264878107654	12	268	6	273	12044	825573774	19051738	18752196	12049	825921011	19398975	19099433	347237	0.795637646829391	0.372400850263629	19225356.5	825747392.5	18925814.5	cela1_red_10_18752196	cela1_red_10_19099433
LG12.c.268.6	Female	-1896.56903148046	-1894.85257088097	12	268	6	273	12044	825573774	19051738	18752196	12049	825921011	19398975	19099433	347237	3.43292119898069	0.0639089656093449	19225356.5	825747392.5	18925814.5	cela1_red_10_18752196	cela1_red_10_19099433
LG12.c.269.6	Both	-2818.06199414894	-2816.46985989161	12	269	6	274	12045	825600940	19078904	18779362	12050	826017428	19495392	19195850	416488	3.1842685146612	0.0743502672209482	19287148	825809184	18987606	cela1_red_10_18779362	cela1_red_10_19195850
LG12.c.269.6	Male	-884.662435408176	-884.24502470961	12	269	6	274	12045	825600940	19078904	18779362	12050	826017428	19495392	19195850	416488	0.8348213971326	0.360882066535481	19287148	825809184	18987606	cela1_red_10_18779362	cela1_red_10_19195850
LG12.c.269.6	Female	-1896.56836578394	-1895.51732180702	12	269	6	274	12045	825600940	19078904	18779362	12050	826017428	19495392	19195850	416488	2.10208795384142	0.147098147194058	19287148	825809184	18987606	cela1_red_10_18779362	cela1_red_10_19195850
LG12.c.270.6	Both	-2818.05976155548	-2817.09366671388	12	270	6	275	12046	825641365	19119329	18819787	12051	826034419	19512383	19212841	393054	1.93218968320434	0.164519081521234	19315856	825837892	19016314	cela1_red_10_18819787	cela1_red_10_19212841
LG12.c.270.6	Male	-884.662756533998	-884.048604631574	12	270	6	275	12046	825641365	19119329	18819787	12051	826034419	19512383	19212841	393054	1.22830380484675	0.267737161403675	19315856	825837892	19016314	cela1_red_10_18819787	cela1_red_10_19212841
LG12.c.270.6	Female	-1896.56694171343	-1896.43109416095	12	270	6	275	12046	825641365	19119329	18819787	12051	826034419	19512383	19212841	393054	0.271695104952869	0.602196941678759	19315856	825837892	19016314	cela1_red_10_18819787	cela1_red_10_19212841
LG12.c.271.6	Both	-2818.05761053927	-2817.69774117097	12	271	6	276	12047	825692791	19170755	18871213	12052	826089471	19567435	19267893	396680	0.71973873661409	0.39622962164478	19369095	825891131	19069553	cela1_red_10_18871213	cela1_red_10_19267893
LG12.c.271.6	Male	-884.661925955303	-884.202472574441	12	271	6	276	12047	825692791	19170755	18871213	12052	826089471	19567435	19267893	396680	0.918906761723065	0.337762184747784	19369095	825891131	19069553	cela1_red_10_18871213	cela1_red_10_19267893
LG12.c.271.6	Female	-1896.56661494237	-1896.56390008461	12	271	6	276	12047	825692791	19170755	18871213	12052	826089471	19567435	19267893	396680	0.00542971550157745	0.941259758848901	19369095	825891131	19069553	cela1_red_10_18871213	cela1_red_10_19267893
LG12.c.272.6	Both	-2818.06082825621	-2817.44252467161	12	272	6	277	12048	825736758	19214722	18915180	12053	826184774	19662738	19363196	448016	1.23660716921495	0.266125938354487	19438730	825960766	19139188	cela1_red_10_18915180	cela1_red_10_19363196
LG12.c.272.6	Male	-884.661625920182	-884.41343576384	12	272	6	277	12048	825736758	19214722	18915180	12053	826184774	19662738	19363196	448016	0.496380312683868	0.481094913812568	19438730	825960766	19139188	cela1_red_10_18915180	cela1_red_10_19363196
LG12.c.272.6	Female	-1896.56896049597	-1896.22060684257	12	272	6	277	12048	825736758	19214722	18915180	12053	826184774	19662738	19363196	448016	0.696707306793542	0.403892303631646	19438730	825960766	19139188	cela1_red_10_18915180	cela1_red_10_19363196
LG12.c.273.6	Both	-2818.07390837957	-2815.14179774699	12	273	6	278	12049	825921011	19398975	19099433	12054	826207323	19685287	19385745	286312	5.86422126515845	0.0154516930909174	19542131	826064167	19242589	cela1_red_10_19099433	cela1_red_10_19385745
LG12.c.273.6	Male	-884.661133259795	-884.661134495978	12	273	6	278	12049	825921011	19398975	19099433	12054	826207323	19685287	19385745	286312	-2.47236562245234e-06	1	19542131	826064167	19242589	cela1_red_10_19099433	cela1_red_10_19385745
LG12.c.273.6	Female	-1896.57533893156	-1894.65201876979	12	273	6	278	12049	825921011	19398975	19099433	12054	826207323	19685287	19385745	286312	3.84664032353066	0.0498457423301191	19542131	826064167	19242589	cela1_red_10_19099433	cela1_red_10_19385745
LG12.c.274.6	Both	-2818.06967970893	-2815.99273708612	12	274	6	279	12050	826017428	19495392	19195850	12055	826347441	19825405	19525863	330013	4.15388524562513	0.0415391081198643	19660398.5	826182434.5	19360856.5	cela1_red_10_19195850	cela1_red_10_19525863
LG12.c.274.6	Male	-884.661199750316	-884.661199926345	12	274	6	279	12050	826017428	19495392	19195850	12055	826347441	19825405	19525863	330013	-3.52058123098686e-07	1	19660398.5	826182434.5	19360856.5	cela1_red_10_19195850	cela1_red_10_19525863
LG12.c.274.6	Female	-1896.57267201071	-1895.35632672753	12	274	6	279	12050	826017428	19495392	19195850	12055	826347441	19825405	19525863	330013	2.43269056636927	0.118828785482284	19660398.5	826182434.5	19360856.5	cela1_red_10_19195850	cela1_red_10_19525863
LG12.c.275.6	Both	-2818.07120140381	-2816.09440306561	12	275	6	280	12051	826034419	19512383	19212841	12056	826380700	19858664	19559122	346281	3.95359667640332	0.046771300536589	19685523.5	826207559.5	19385981.5	cela1_red_10_19212841	cela1_red_10_19559122
LG12.c.275.6	Male	-884.661229895968	-884.66123016403	12	275	6	280	12051	826034419	19512383	19212841	12056	826380700	19858664	19559122	346281	-5.36123479832895e-07	1	19685523.5	826207559.5	19385981.5	cela1_red_10_19212841	cela1_red_10_19559122
LG12.c.275.6	Female	-1896.57400832374	-1895.37932896637	12	275	6	280	12051	826034419	19512383	19212841	12056	826380700	19858664	19559122	346281	2.38935871473677	0.122163733468105	19685523.5	826207559.5	19385981.5	cela1_red_10_19212841	cela1_red_10_19559122
LG12.c.276.6	Both	-2818.069965876	-2816.29170872094	12	276	6	281	12052	826089471	19567435	19267893	12057	826439273	19917237	19617695	349802	3.55651431012393	0.0593121658538712	19742336	826264372	19442794	cela1_red_10_19267893	cela1_red_10_19617695
LG12.c.276.6	Male	-884.660878788137	-884.660879983042	12	276	6	281	12052	826089471	19567435	19267893	12057	826439273	19917237	19617695	349802	-2.38980965150404e-06	1	19742336	826264372	19442794	cela1_red_10_19267893	cela1_red_10_19617695
LG12.c.276.6	Female	-1896.57379377709	-1895.44268415661	12	276	6	281	12052	826089471	19567435	19267893	12057	826439273	19917237	19617695	349802	2.26221924097536	0.132563970667832	19742336	826264372	19442794	cela1_red_10_19267893	cela1_red_10_19617695
LG12.c.277.6	Both	-2818.09126208463	-2810.26176839493	12	277	6	282	12053	826184774	19662738	19363196	12058	826519623	19997587	19698045	334849	15.6589873793992	7.58512597701655e-05	19830162.5	826352198.5	19530620.5	cela1_red_10_19363196	cela1_red_10_19698045
LG12.c.277.6	Male	-884.662366445865	-883.993989052402	12	277	6	282	12053	826184774	19662738	19363196	12058	826519623	19997587	19698045	334849	1.33675478692521	0.247607079850699	19830162.5	826352198.5	19530620.5	cela1_red_10_19363196	cela1_red_10_19698045
LG12.c.277.6	Female	-1896.58310811561	-1891.64679650224	12	277	6	282	12053	826184774	19662738	19363196	12058	826519623	19997587	19698045	334849	9.87262322673587	0.00167756160082178	19830162.5	826352198.5	19530620.5	cela1_red_10_19363196	cela1_red_10_19698045
LG12.c.278.6	Both	-2818.09679391094	-2804.91430903001	12	278	6	283	12054	826207323	19685287	19385745	12059	826583942	20061906	19762364	376619	26.3649697618503	2.82619941893714e-07	19873596.5	826395632.5	19574054.5	cela1_red_10_19385745	cela1_red_10_19762364
LG12.c.278.6	Male	-884.662634074691	-883.626783586539	12	278	6	283	12054	826207323	19685287	19385745	12059	826583942	20061906	19762364	376619	2.07170097630387	0.150054083078956	19873596.5	826395632.5	19574054.5	cela1_red_10_19385745	cela1_red_10_19762364
LG12.c.278.6	Female	-1896.58625918991	-1886.57839227733	12	278	6	283	12054	826207323	19685287	19385745	12059	826583942	20061906	19762364	376619	20.0157338251579	7.68075759038922e-06	19873596.5	826395632.5	19574054.5	cela1_red_10_19385745	cela1_red_10_19762364
LG12.c.279.6	Both	-2818.08695038987	-2807.07665291765	12	279	6	284	12055	826347441	19825405	19525863	12060	826649623	20127587	19828045	302182	22.0205949444326	2.69740522695905e-06	19976496	826498532	19676954	cela1_red_10_19525863	cela1_red_10_19828045
LG12.c.279.6	Male	-884.662309752345	-883.965701751552	12	279	6	284	12055	826347441	19825405	19525863	12060	826649623	20127587	19828045	302182	1.39321600158519	0.237862743927046	19976496	826498532	19676954	cela1_red_10_19525863	cela1_red_10_19828045
LG12.c.279.6	Female	-1896.58222719258	-1888.2795801698	12	279	6	284	12055	826347441	19825405	19525863	12060	826649623	20127587	19828045	302182	16.6052940455506	4.60223771970858e-05	19976496	826498532	19676954	cela1_red_10_19525863	cela1_red_10_19828045
LG12.c.280.6	Both	-2818.09242000852	-2807.98843104069	12	280	6	285	12056	826380700	19858664	19559122	12061	826673841	20151805	19852263	293141	20.2079779356582	6.94626390695952e-06	20005234.5	826527270.5	19705692.5	cela1_red_10_19559122	cela1_red_10_19852263
LG12.c.280.6	Male	-884.662372869305	-883.908027932077	12	280	6	285	12056	826380700	19858664	19559122	12061	826673841	20151805	19852263	293141	1.50868987445756	0.219339108788217	20005234.5	826527270.5	19705692.5	cela1_red_10_19559122	cela1_red_10_19852263
LG12.c.280.6	Female	-1896.58592015066	-1889.28850361262	12	280	6	285	12056	826380700	19858664	19559122	12061	826673841	20151805	19852263	293141	14.5948330760662	0.000133279478974346	20005234.5	826527270.5	19705692.5	cela1_red_10_19559122	cela1_red_10_19852263
LG12.c.281.6	Both	-2818.09142525267	-2809.5975749007	12	281	6	286	12057	826439273	19917237	19617695	12062	826833739	20311703	20012161	394466	16.9877007039377	3.76227463496637e-05	20114470	826636506	19814928	cela1_red_10_19617695	cela1_red_10_20012161
LG12.c.281.6	Male	-884.662295718405	-883.848389831855	12	281	6	286	12057	826439273	19917237	19617695	12062	826833739	20311703	20012161	394466	1.62781177310035	0.20200597840636	20114470	826636506	19814928	cela1_red_10_19617695	cela1_red_10_20012161
LG12.c.281.6	Female	-1896.58580764092	-1890.70601473808	12	281	6	286	12057	826439273	19917237	19617695	12062	826833739	20311703	20012161	394466	11.7595858056775	0.000605306943989636	20114470	826636506	19814928	cela1_red_10_19617695	cela1_red_10_20012161
LG12.c.282.6	Both	-2818.09856313898	-2806.16876951329	12	282	6	287	12058	826519623	19997587	19698045	12063	826892097	20370061	20070519	372474	23.8595872513943	1.03624493208443e-06	20183824	826705860	19884282	cela1_red_10_19698045	cela1_red_10_20070519
LG12.c.282.6	Male	-884.662306216869	-884.039867750325	12	282	6	287	12058	826519623	19997587	19698045	12063	826892097	20370061	20070519	372474	1.24487693308743	0.264533215829144	20183824	826705860	19884282	cela1_red_10_19698045	cela1_red_10_20070519
LG12.c.282.6	Female	-1896.5895694674	-1886.84896531884	12	282	6	287	12058	826519623	19997587	19698045	12063	826892097	20370061	20070519	372474	19.481208297118	1.01594250382364e-05	20183824	826705860	19884282	cela1_red_10_19698045	cela1_red_10_20070519
LG12.c.283.6	Both	-2818.07977261332	-2813.4620921391	12	283	6	288	12059	826583942	20061906	19762364	12064	826911513	20389477	20089935	327571	9.23536094845622	0.00237385603088092	20225691.5	826747727.5	19926149.5	cela1_red_10_19762364	cela1_red_10_20089935
LG12.c.283.6	Male	-884.66093457403	-884.66093580693	12	283	6	288	12059	826583942	20061906	19762364	12064	826911513	20389477	20089935	327571	-2.46579952545289e-06	1	20225691.5	826747727.5	19926149.5	cela1_red_10_19762364	cela1_red_10_20089935
LG12.c.283.6	Female	-1896.58168743593	-1892.08602483797	12	283	6	288	12059	826583942	20061906	19762364	12064	826911513	20389477	20089935	327571	8.9913251959224	0.0027126421330429	20225691.5	826747727.5	19926149.5	cela1_red_10_19762364	cela1_red_10_20089935
LG12.c.284.6	Both	-2818.07122264352	-2814.32607720123	12	284	6	289	12060	826649623	20127587	19828045	12065	827142310	20620274	20320732	492687	7.49029088458155	0.00620325348816952	20373930.5	826895966.5	20074388.5	cela1_red_10_19828045	cela1_red_10_20320732
LG12.c.284.6	Male	-884.660781781474	-884.660783487723	12	284	6	289	12060	826649623	20127587	19828045	12065	827142310	20620274	20320732	492687	-3.41249892699125e-06	1	20373930.5	826895966.5	20074388.5	cela1_red_10_19828045	cela1_red_10_20320732
LG12.c.284.6	Female	-1896.57647559813	-1892.97468236121	12	284	6	289	12060	826649623	20127587	19828045	12065	827142310	20620274	20320732	492687	7.20358647382864	0.00727580323416532	20373930.5	826895966.5	20074388.5	cela1_red_10_19828045	cela1_red_10_20320732
LG12.c.285.6	Both	-2818.08106869072	-2811.00915377288	12	285	6	290	12061	826673841	20151805	19852263	12066	827297855	20775819	20476277	624014	14.1438298356761	0.000169351618810043	20463812	826985848	20164270	cela1_red_10_19852263	cela1_red_10_20476277
LG12.c.285.6	Male	-884.661126746545	-884.661127854108	12	285	6	290	12061	826673841	20151805	19852263	12066	827297855	20775819	20476277	624014	-2.21512482312392e-06	1	20463812	826985848	20164270	cela1_red_10_19852263	cela1_red_10_20476277
LG12.c.285.6	Female	-1896.58023426731	-1890.43463332734	12	285	6	290	12061	826673841	20151805	19852263	12066	827297855	20775819	20476277	624014	12.2912018799266	0.000455098569349111	20463812	826985848	20164270	cela1_red_10_19852263	cela1_red_10_20476277
LG12.c.286.6	Both	-2818.07717765122	-2809.34805931684	12	286	6	291	12062	826833739	20311703	20012161	12067	827341085	20819049	20519507	507346	17.45823666877	2.9368902585869e-05	20565376	827087412	20265834	cela1_red_10_20012161	cela1_red_10_20519507
LG12.c.286.6	Male	-884.661167400869	-884.66116804405	12	286	6	291	12062	826833739	20311703	20012161	12067	827341085	20819049	20519507	507346	-1.2863627034676e-06	1	20565376	827087412	20265834	cela1_red_10_20012161	cela1_red_10_20519507
LG12.c.286.6	Female	-1896.57779653567	-1888.68674530851	12	286	6	291	12062	826833739	20311703	20012161	12067	827341085	20819049	20519507	507346	15.7821024543082	7.10716474686679e-05	20565376	827087412	20265834	cela1_red_10_20012161	cela1_red_10_20519507
LG12.c.287.6	Both	-2818.09568341863	-2807.79348700876	12	287	6	292	12063	826892097	20370061	20070519	12068	827404788	20882752	20583210	512691	20.6043928197359	5.64664003288584e-06	20626406.5	827148442.5	20326864.5	cela1_red_10_20070519	cela1_red_10_20583210
LG12.c.287.6	Male	-884.661864579413	-884.466645447203	12	287	6	292	12063	826892097	20370061	20070519	12068	827404788	20882752	20583210	512691	0.390438264418663	0.532069121322726	20626406.5	827148442.5	20326864.5	cela1_red_10_20070519	cela1_red_10_20583210
LG12.c.287.6	Female	-1896.58687204627	-1887.98045400554	12	287	6	292	12063	826892097	20370061	20070519	12068	827404788	20882752	20583210	512691	17.2128360814609	3.3417081258813e-05	20626406.5	827148442.5	20326864.5	cela1_red_10_20070519	cela1_red_10_20583210
LG12.c.288.6	Both	-2818.10502925055	-2805.37211192806	12	288	6	293	12064	826911513	20389477	20089935	12069	827436275	20914239	20614697	524762	25.4658346449687	4.50286645303777e-07	20651858	827173894	20352316	cela1_red_10_20089935	cela1_red_10_20614697
LG12.c.288.6	Male	-884.662538500717	-883.97974976692	12	288	6	293	12064	826911513	20389477	20089935	12069	827436275	20914239	20614697	524762	1.36557746759399	0.242573191695866	20651858	827173894	20352316	cela1_red_10_20089935	cela1_red_10_20614697
LG12.c.288.6	Female	-1896.5917623615	-1885.91923113742	12	288	6	293	12064	826911513	20389477	20089935	12069	827436275	20914239	20614697	524762	21.3450624481497	3.83607467324687e-06	20651858	827173894	20352316	cela1_red_10_20089935	cela1_red_10_20614697
LG12.c.289.6	Both	-2818.10482091668	-2804.51486154087	12	289	6	294	12065	827142310	20620274	20320732	12070	827465373	20943337	20643795	323063	27.1799187516144	1.85374137706695e-07	20781805.5	827303841.5	20482263.5	cela1_red_10_20320732	cela1_red_10_20643795
LG12.c.289.6	Male	-884.66245282083	-884.006270598304	12	289	6	294	12065	827142310	20620274	20320732	12070	827465373	20943337	20643795	323063	1.31236444505271	0.251967005561423	20781805.5	827303841.5	20482263.5	cela1_red_10_20320732	cela1_red_10_20643795
LG12.c.289.6	Female	-1896.59233318339	-1885.1218377404	12	289	6	294	12065	827142310	20620274	20320732	12070	827465373	20943337	20643795	323063	22.9409908859748	1.67051283195274e-06	20781805.5	827303841.5	20482263.5	cela1_red_10_20320732	cela1_red_10_20643795
LG12.c.290.6	Both	-2818.10435251119	-2804.70059987273	12	290	6	295	12066	827297855	20775819	20476277	12071	827573182	21051146	20751604	275327	26.8075052769027	2.24762720102412e-07	20913482.5	827435518.5	20613940.5	cela1_red_10_20476277	cela1_red_10_20751604
LG12.c.290.6	Male	-884.662481833675	-883.99236035324	12	290	6	295	12066	827297855	20775819	20476277	12071	827573182	21051146	20751604	275327	1.34024296087091	0.246991126124805	20913482.5	827435518.5	20613940.5	cela1_red_10_20476277	cela1_red_10_20751604
LG12.c.290.6	Female	-1896.59210283991	-1885.29466435012	12	290	6	295	12066	827297855	20775819	20476277	12071	827573182	21051146	20751604	275327	22.5948769795914	2.00017248108697e-06	20913482.5	827435518.5	20613940.5	cela1_red_10_20476277	cela1_red_10_20751604
LG12.c.291.6	Both	-2818.09533602368	-2805.79548963271	12	291	6	296	12067	827341085	20819049	20519507	12072	827611169	21089133	20789591	270084	24.599692781936	7.05629827346677e-07	20954091	827476127	20654549	cela1_red_10_20519507	cela1_red_10_20789591
LG12.c.291.6	Male	-884.662345738888	-884.030154515821	12	291	6	296	12067	827341085	20819049	20519507	12072	827611169	21089133	20789591	270084	1.2643824461336	0.26082318060192	20954091	827476127	20654549	cela1_red_10_20519507	cela1_red_10_20789591
LG12.c.291.6	Female	-1896.58722262145	-1886.16195636927	12	291	6	296	12067	827341085	20819049	20519507	12072	827611169	21089133	20789591	270084	20.8505325043675	4.96554187712217e-06	20954091	827476127	20654549	cela1_red_10_20519507	cela1_red_10_20789591
LG12.c.292.6	Both	-2818.09822897444	-2802.77629896496	12	292	6	297	12068	827404788	20882752	20583210	12073	827703171	21181135	20881593	298383	30.6438600189531	3.100060619321e-08	21031943.5	827553979.5	20732401.5	cela1_red_10_20583210	cela1_red_10_20881593
LG12.c.292.6	Male	-884.662153728139	-884.241720673564	12	292	6	297	12068	827404788	20882752	20583210	12073	827703171	21181135	20881593	298383	0.840866109148692	0.359149180628731	21031943.5	827553979.5	20732401.5	cela1_red_10_20583210	cela1_red_10_20881593
LG12.c.292.6	Female	-1896.58990753888	-1883.53197655957	12	292	6	297	12068	827404788	20882752	20583210	12073	827703171	21181135	20881593	298383	26.1158619586304	3.21531752889292e-07	21031943.5	827553979.5	20732401.5	cela1_red_10_20583210	cela1_red_10_20881593
LG12.c.293.6	Both	-2818.08501677997	-2805.90458900461	12	293	6	298	12069	827436275	20914239	20614697	12074	827741684	21219648	20920106	305409	24.3608555507171	7.98753556519038e-07	21066943.5	827588979.5	20767401.5	cela1_red_10_20614697	cela1_red_10_20920106
LG12.c.293.6	Male	-884.662171176237	-884.022733404237	12	293	6	298	12069	827436275	20914239	20614697	12074	827741684	21219648	20920106	305409	1.27887554400036	0.258108213573886	21066943.5	827588979.5	20767401.5	cela1_red_10_20614697	cela1_red_10_20920106
LG12.c.293.6	Female	-1896.58237335826	-1886.95911028636	12	293	6	298	12069	827436275	20914239	20614697	12074	827741684	21219648	20920106	305409	19.2465261437842	1.14879220807218e-05	21066943.5	827588979.5	20767401.5	cela1_red_10_20614697	cela1_red_10_20920106
LG12.c.294.6	Both	-2818.07869916262	-2809.18005959933	12	294	6	299	12070	827465373	20943337	20643795	12075	827760920	21238884	20939342	295547	17.7972791265938	2.4573439909692e-05	21091110.5	827613146.5	20791568.5	cela1_red_10_20643795	cela1_red_10_20939342
LG12.c.294.6	Male	-884.661342280587	-884.664018376151	12	294	6	299	12070	827465373	20943337	20643795	12075	827760920	21238884	20939342	295547	-0.00535219112725827	1	21091110.5	827613146.5	20791568.5	cela1_red_10_20643795	cela1_red_10_20939342
LG12.c.294.6	Female	-1896.5825951121	-1889.4298784064	12	294	6	299	12070	827465373	20943337	20643795	12075	827760920	21238884	20939342	295547	14.3054334114099	0.000155415639048306	21091110.5	827613146.5	20791568.5	cela1_red_10_20643795	cela1_red_10_20939342
LG12.c.295.6	Both	-2818.08342084549	-2808.67102884681	12	295	6	300	12071	827573182	21051146	20751604	12076	827798608	21276572	20977030	225426	18.8247839973492	1.43292978693754e-05	21163859	827685895	20864317	cela1_red_10_20751604	cela1_red_10_20977030
LG12.c.295.6	Male	-884.661699446278	-884.370922140502	12	295	6	300	12071	827573182	21051146	20751604	12076	827798608	21276572	20977030	225426	0.581554611552974	0.445703607207071	21163859	827685895	20864317	cela1_red_10_20751604	cela1_red_10_20977030
LG12.c.295.6	Female	-1896.58520325242	-1888.92741324072	12	295	6	300	12071	827573182	21051146	20751604	12076	827798608	21276572	20977030	225426	15.3155800234035	9.09631924644883e-05	21163859	827685895	20864317	cela1_red_10_20751604	cela1_red_10_20977030
LG12.c.296.6	Both	-2818.09301508124	-2804.84553939496	12	296	6	301	12072	827611169	21089133	20789591	12077	827822123	21300087	21000545	210954	26.4949513725605	2.64227760227165e-07	21194610	827716646	20895068	cela1_red_10_20789591	cela1_red_10_21000545
LG12.c.296.6	Male	-884.661944481254	-884.287008989481	12	296	6	301	12072	827611169	21089133	20789591	12077	827822123	21300087	21000545	210954	0.749870983544497	0.386517081216622	21194610	827716646	20895068	cela1_red_10_20789591	cela1_red_10_21000545
LG12.c.296.6	Female	-1896.59036532914	-1884.65156433797	12	296	6	301	12072	827611169	21089133	20789591	12077	827822123	21300087	21000545	210954	23.8776019823335	1.02659272671612e-06	21194610	827716646	20895068	cela1_red_10_20789591	cela1_red_10_21000545
LG12.c.297.6	Both	-2818.08931791619	-2809.16488231201	12	297	6	302	12073	827703171	21181135	20881593	12078	827877326	21355290	21055748	174155	17.8488712083608	2.39161095260121e-05	21268212.5	827790248.5	20968670.5	cela1_red_10_20881593	cela1_red_10_21055748
LG12.c.297.6	Male	-884.661790305391	-884.572286558786	12	297	6	302	12073	827703171	21181135	20881593	12078	827877326	21355290	21055748	174155	0.17900749320961	0.672227576171859	21268212.5	827790248.5	20968670.5	cela1_red_10_20881593	cela1_red_10_21055748
LG12.c.297.6	Female	-1896.58856441042	-1888.0589978594	12	297	6	302	12073	827703171	21181135	20881593	12078	827877326	21355290	21055748	174155	17.0591331020432	3.6233689722609e-05	21268212.5	827790248.5	20968670.5	cela1_red_10_20881593	cela1_red_10_21055748
LG12.c.298.6	Both	-2818.08613956192	-2807.55727837825	12	298	6	303	12074	827741684	21219648	20920106	12079	827914073	21392037	21092495	172389	21.0577223673317	4.45653123570811e-06	21305842.5	827827878.5	21006300.5	cela1_red_10_20920106	cela1_red_10_21092495
LG12.c.298.6	Male	-884.661731277181	-884.505650099524	12	298	6	303	12074	827741684	21219648	20920106	12079	827914073	21392037	21092495	172389	0.312162355314058	0.576356299156612	21305842.5	827827878.5	21006300.5	cela1_red_10_20920106	cela1_red_10_21092495
LG12.c.298.6	Female	-1896.58569623091	-1886.41161853755	12	298	6	303	12074	827741684	21219648	20920106	12079	827914073	21392037	21092495	172389	20.3481553867168	6.45552891220813e-06	21305842.5	827827878.5	21006300.5	cela1_red_10_20920106	cela1_red_10_21092495
LG12.c.299.6	Both	-2818.08174542372	-2809.7628252003	12	299	6	304	12075	827760920	21238884	20939342	12080	827936763	21414727	21115185	175843	16.6378404468487	4.52393893737302e-05	21326805.5	827848841.5	21027263.5	cela1_red_10_20939342	cela1_red_10_21115185
LG12.c.299.6	Male	-884.661091808739	-884.661092640265	12	299	6	304	12075	827760920	21238884	20939342	12080	827936763	21414727	21115185	175843	-1.66305039783765e-06	1	21326805.5	827848841.5	21027263.5	cela1_red_10_20939342	cela1_red_10_21115185
LG12.c.299.6	Female	-1896.58355513934	-1887.95584918653	12	299	6	304	12075	827760920	21238884	20939342	12080	827936763	21414727	21115185	175843	17.2554119056335	3.26765467824064e-05	21326805.5	827848841.5	21027263.5	cela1_red_10_20939342	cela1_red_10_21115185
LG12.c.300.6	Both	-2818.07286679286	-2814.01329313082	12	300	6	305	12076	827798608	21276572	20977030	12081	828003797	21481761	21182219	205189	8.11914732407604	0.0043800154938014	21379166.5	827901202.5	21079624.5	cela1_red_10_20977030	cela1_red_10_21182219
LG12.c.300.6	Male	-884.661059819777	-884.661060488828	12	300	6	305	12076	827798608	21276572	20977030	12081	828003797	21481761	21182219	205189	-1.33810203806206e-06	1	21379166.5	827901202.5	21079624.5	cela1_red_10_20977030	cela1_red_10_21182219
LG12.c.300.6	Female	-1896.57515477082	-1893.14799694234	12	300	6	305	12076	827798608	21276572	20977030	12081	828003797	21481761	21182219	205189	6.85431565694807	0.00884274191802414	21379166.5	827901202.5	21079624.5	cela1_red_10_20977030	cela1_red_10_21182219
LG12.c.301.6	Both	-2818.08885401512	-2809.27382705145	12	301	6	306	12077	827822123	21300087	21000545	12082	828064106	21542070	21242528	241983	17.6300539273334	2.68314492499755e-05	21421078.5	827943114.5	21121536.5	cela1_red_10_21000545	cela1_red_10_21242528
LG12.c.301.6	Male	-884.661084329649	-884.66108476132	12	301	6	306	12077	827822123	21300087	21000545	12082	828064106	21542070	21242528	241983	-8.6334193838411e-07	1	21421078.5	827943114.5	21121536.5	cela1_red_10_21000545	cela1_red_10_21242528
LG12.c.301.6	Female	-1896.58481734858	-1888.57027779889	12	301	6	306	12077	827822123	21300087	21000545	12082	828064106	21542070	21242528	241983	16.0290790993727	6.23770441768867e-05	21421078.5	827943114.5	21121536.5	cela1_red_10_21000545	cela1_red_10_21242528
LG12.c.302.6	Both	-2818.08942645146	-2808.15283363135	12	302	6	307	12078	827877326	21355290	21055748	12083	828116957	21594921	21295379	239631	19.8731856402201	8.27529344227251e-06	21475105.5	827997141.5	21175563.5	cela1_red_10_21055748	cela1_red_10_21295379
LG12.c.302.6	Male	-884.661916861012	-884.326533186911	12	302	6	307	12078	827877326	21355290	21055748	12083	828116957	21594921	21295379	239631	0.670767348202844	0.412784202421276	21475105.5	827997141.5	21175563.5	cela1_red_10_21055748	cela1_red_10_21295379
LG12.c.302.6	Female	-1896.58481679879	-1888.11298827224	12	302	6	307	12078	827877326	21355290	21055748	12083	828116957	21594921	21295379	239631	16.9436570530902	3.85057597573901e-05	21475105.5	827997141.5	21175563.5	cela1_red_10_21055748	cela1_red_10_21295379
LG12.c.303.6	Both	-2818.09296824917	-2807.53455706486	12	303	6	308	12079	827914073	21392037	21092495	12084	828194016	21671980	21372438	279943	21.1168223686118	4.32118014970229e-06	21532008.5	828054044.5	21232466.5	cela1_red_10_21092495	cela1_red_10_21372438
LG12.c.303.6	Male	-884.662306881706	-883.8005283761	12	303	6	308	12079	827914073	21392037	21092495	12084	828194016	21671980	21372438	279943	1.72355701121296	0.189235822677244	21532008.5	828054044.5	21232466.5	cela1_red_10_21092495	cela1_red_10_21372438
LG12.c.303.6	Female	-1896.58636304215	-1887.94089175842	12	303	6	308	12079	827914073	21392037	21092495	12084	828194016	21671980	21372438	279943	17.290942567467	3.2071190716132e-05	21532008.5	828054044.5	21232466.5	cela1_red_10_21092495	cela1_red_10_21372438
LG12.c.304.6	Both	-2818.09283403299	-2806.63922502319	12	304	6	309	12080	827936763	21414727	21115185	12085	828552536	22030500	21730958	615773	22.9072180196017	1.70012235445327e-06	21722613.5	828244649.5	21423071.5	cela1_red_10_21115185	cela1_red_10_21730958
LG12.c.304.6	Male	-884.662415968019	-883.59938430547	12	304	6	309	12080	827936763	21414727	21115185	12085	828552536	22030500	21730958	615773	2.12606332509904	0.144812252289198	21722613.5	828244649.5	21423071.5	cela1_red_10_21115185	cela1_red_10_21730958
LG12.c.304.6	Female	-1896.58607371587	-1887.14272107007	12	304	6	309	12080	827936763	21414727	21115185	12085	828552536	22030500	21730958	615773	18.8867052915966	1.38716044659759e-05	21722613.5	828244649.5	21423071.5	cela1_red_10_21115185	cela1_red_10_21730958
LG12.c.305.6	Both	-2818.09198500069	-2807.18765520822	12	305	6	310	12081	828003797	21481761	21182219	12086	828629574	22107538	21807996	625777	21.8086595849209	3.01237478805838e-06	21794649.5	828316685.5	21495107.5	cela1_red_10_21182219	cela1_red_10_21807996
LG12.c.305.6	Male	-884.662328482857	-883.47226824594	12	305	6	310	12081	828003797	21481761	21182219	12086	828629574	22107538	21807996	625777	2.38012047383449	0.12288806961389	21794649.5	828316685.5	21495107.5	cela1_red_10_21182219	cela1_red_10_21807996
LG12.c.305.6	Female	-1896.58627638091	-1887.53459336518	12	305	6	310	12081	828003797	21481761	21182219	12086	828629574	22107538	21807996	625777	18.1033660314715	2.09231229552076e-05	21794649.5	828316685.5	21495107.5	cela1_red_10_21182219	cela1_red_10_21807996
LG12.c.306.6	Both	-2818.11186691911	-2804.77348323815	12	306	6	311	12082	828064106	21542070	21242528	12087	828699985	22177949	21878407	635879	26.6767673619261	2.40495877323887e-07	21860009.5	828382045.5	21560467.5	cela1_red_10_21242528	cela1_red_10_21878407
LG12.c.306.6	Male	-884.663880009957	-882.149223066785	12	306	6	311	12082	828064106	21542070	21242528	12087	828699985	22177949	21878407	635879	5.0293138863442	0.0249217694234092	21860009.5	828382045.5	21560467.5	cela1_red_10_21242528	cela1_red_10_21878407
LG12.c.306.6	Female	-1896.59663410919	-1885.71614581969	12	306	6	311	12082	828064106	21542070	21242528	12087	828699985	22177949	21878407	635879	21.7609765790116	3.08817926863991e-06	21860009.5	828382045.5	21560467.5	cela1_red_10_21242528	cela1_red_10_21878407
LG12.c.307.6	Both	-2818.08854728633	-2810.50519125844	12	307	6	312	12083	828116957	21594921	21295379	12088	828740886	22218850	21919308	623929	15.1667120557859	9.84232882524916e-05	21906885.5	828428921.5	21607343.5	cela1_red_10_21295379	cela1_red_10_21919308
LG12.c.307.6	Male	-884.66349604829	-882.434427241136	12	307	6	312	12083	828116957	21594921	21295379	12088	828740886	22218850	21919308	623929	4.45813761430782	0.0347353490262681	21906885.5	828428921.5	21607343.5	cela1_red_10_21295379	cela1_red_10_21919308
LG12.c.307.6	Female	-1896.58217880775	-1891.96720520476	12	307	6	312	12083	828116957	21594921	21295379	12088	828740886	22218850	21919308	623929	9.22994720597899	0.0023808851221675	21906885.5	828428921.5	21607343.5	cela1_red_10_21295379	cela1_red_10_21919308
LG12.c.308.6	Both	-2818.08138308527	-2810.06420028714	12	308	6	313	12084	828194016	21671980	21372438	12089	828877208	22355172	22055630	683192	16.0343655962688	6.22031264605472e-05	22013576	828535612	21714034	cela1_red_10_21372438	cela1_red_10_22055630
LG12.c.308.6	Male	-884.662312523684	-883.697494218416	12	308	6	313	12084	828194016	21671980	21372438	12089	828877208	22355172	22055630	683192	1.92963661053477	0.164798207008369	22013576	828535612	21714034	cela1_red_10_21372438	cela1_red_10_22055630
LG12.c.308.6	Female	-1896.57942720481	-1890.81390231344	12	308	6	313	12084	828194016	21671980	21372438	12089	828877208	22355172	22055630	683192	11.5310497827404	0.00068443353949299	22013576	828535612	21714034	cela1_red_10_21372438	cela1_red_10_22055630
LG12.c.309.6	Both	-2818.07877198923	-2809.85033714944	12	309	6	314	12085	828552536	22030500	21730958	12090	828991652	22469616	22170074	439116	16.4568696795905	4.9769505985231e-05	22250058	828772094	21950516	cela1_red_10_21730958	cela1_red_10_22170074
LG12.c.309.6	Male	-884.661977064238	-883.739840379468	12	309	6	314	12085	828552536	22030500	21730958	12090	828991652	22469616	22170074	439116	1.84427336954013	0.174450907028699	22250058	828772094	21950516	cela1_red_10_21730958	cela1_red_10_22170074
LG12.c.309.6	Female	-1896.57822324216	-1890.55193177521	12	309	6	314	12085	828552536	22030500	21730958	12090	828991652	22469616	22170074	439116	12.0525829338894	0.000517206659017555	22250058	828772094	21950516	cela1_red_10_21730958	cela1_red_10_22170074
LG12.c.310.6	Both	-2818.0791010127	-2809.8616626513	12	310	6	315	12086	828629574	22107538	21807996	12091	829002214	22480178	22180636	372640	16.4348767228048	5.0350259311438e-05	22293858	828815894	21994316	cela1_red_10_21807996	cela1_red_10_22180636
LG12.c.310.6	Male	-884.662037711765	-884.082519818012	12	310	6	315	12086	828629574	22107538	21807996	12091	829002214	22480178	22180636	372640	1.15903578750681	0.28166559939018	22293858	828815894	21994316	cela1_red_10_21807996	cela1_red_10_22180636
LG12.c.310.6	Female	-1896.57831177119	-1890.34342352371	12	310	6	315	12086	828629574	22107538	21807996	12091	829002214	22480178	22180636	372640	12.4697764949715	0.000413589576555795	22293858	828815894	21994316	cela1_red_10_21807996	cela1_red_10_22180636
LG12.c.311.6	Both	-2818.07748981812	-2808.99098745983	12	311	6	316	12087	828699985	22177949	21878407	12092	829034123	22512087	22212545	334138	18.173004716582	2.01717918690836e-05	22345018	828867054	22045476	cela1_red_10_21878407	cela1_red_10_22212545
LG12.c.311.6	Male	-884.662120131595	-883.77159845097	12	311	6	316	12087	828699985	22177949	21878407	12092	829034123	22512087	22212545	334138	1.78104336124943	0.182021259866896	22345018	828867054	22045476	cela1_red_10_21878407	cela1_red_10_22212545
LG12.c.311.6	Female	-1896.57728499026	-1889.6882346815	12	311	6	316	12087	828699985	22177949	21878407	12092	829034123	22512087	22212545	334138	13.7781006175114	0.000205720322086322	22345018	828867054	22045476	cela1_red_10_21878407	cela1_red_10_22212545
LG12.c.312.6	Both	-2818.05653433003	-2817.85048236916	12	312	6	317	12088	828740886	22218850	21919308	12093	829187486	22665450	22365908	446600	0.412103921744347	0.520903564864647	22442150	828964186	22142608	cela1_red_10_21919308	cela1_red_10_22365908
LG12.c.312.6	Male	-884.660706887369	-884.660708499698	12	312	6	317	12088	828740886	22218850	21919308	12093	829187486	22665450	22365908	446600	-3.2246580303763e-06	1	22442150	828964186	22142608	cela1_red_10_21919308	cela1_red_10_22365908
LG12.c.312.6	Female	-1896.56657193777	-1896.53018696851	12	312	6	317	12088	828740886	22218850	21919308	12093	829187486	22665450	22365908	446600	0.0727699385033702	0.787345637914076	22442150	828964186	22142608	cela1_red_10_21919308	cela1_red_10_22365908
LG12.c.313.6	Both	-2818.05678851934	-2817.82723027786	12	313	6	318	12089	828877208	22355172	22055630	12094	829217360	22695324	22395782	340152	0.459116482954414	0.498037175716972	22525248	829047284	22225706	cela1_red_10_22055630	cela1_red_10_22395782
LG12.c.313.6	Male	-884.661548983036	-884.55709758653	12	313	6	318	12089	828877208	22355172	22055630	12094	829217360	22695324	22395782	340152	0.20890279301193	0.647628746031639	22525248	829047284	22225706	cela1_red_10_22055630	cela1_red_10_22395782
LG12.c.313.6	Female	-1896.56652953109	-1896.42230737024	12	313	6	318	12089	828877208	22355172	22055630	12094	829217360	22695324	22395782	340152	0.288444321708994	0.59121917441687	22525248	829047284	22225706	cela1_red_10_22055630	cela1_red_10_22395782
LG12.c.314.6	Both	-2818.05496563847	-2818.0549672129	12	314	6	319	12090	828991652	22469616	22170074	12095	829245916	22723880	22424338	254264	-3.14886528940406e-06	1	22596748	829118784	22297206	cela1_red_10_22170074	cela1_red_10_22424338
LG12.c.314.6	Male	-884.661796642691	-884.503341460216	12	314	6	319	12090	828991652	22469616	22170074	12095	829245916	22723880	22424338	254264	0.316910364948399	0.573470345390552	22596748	829118784	22297206	cela1_red_10_22170074	cela1_red_10_22424338
LG12.c.314.6	Female	-1896.56482516309	-1896.56482971463	12	314	6	319	12090	828991652	22469616	22170074	12095	829245916	22723880	22424338	254264	-9.10307699086843e-06	1	22596748	829118784	22297206	cela1_red_10_22170074	cela1_red_10_22424338
LG12.c.315.6	Both	-2818.05575427652	-2818.05563899141	12	315	6	320	12091	829002214	22480178	22180636	12096	829272271	22750235	22450693	270057	0.000230570227358839	0.987884956260813	22615206.5	829137242.5	22315664.5	cela1_red_10_22180636	cela1_red_10_22450693
LG12.c.315.6	Male	-884.66174809682	-884.520574133996	12	315	6	320	12091	829002214	22480178	22180636	12096	829272271	22750235	22450693	270057	0.282347925647855	0.59516641650763	22615206.5	829137242.5	22315664.5	cela1_red_10_22180636	cela1_red_10_22450693
LG12.c.315.6	Female	-1896.56591932158	-1896.5659250412	12	315	6	320	12091	829002214	22480178	22180636	12096	829272271	22750235	22450693	270057	-1.14392246359785e-05	1	22615206.5	829137242.5	22315664.5	cela1_red_10_22180636	cela1_red_10_22450693
LG12.c.316.6	Both	-2818.05608083416	-2818.02044659984	12	316	6	321	12092	829034123	22512087	22212545	12097	829789764	23267728	22968186	755641	0.0712684686350258	0.789498766421279	22889907.5	829411943.5	22590365.5	cela1_red_10_22212545	cela1_red_10_22968186
LG12.c.316.6	Male	-884.661636046123	-884.480765354067	12	316	6	321	12092	829034123	22512087	22212545	12097	829789764	23267728	22968186	755641	0.361741384111383	0.547540702397592	22889907.5	829411943.5	22590365.5	cela1_red_10_22212545	cela1_red_10_22968186
LG12.c.316.6	Female	-1896.56689399251	-1896.35931326706	12	316	6	321	12092	829034123	22512087	22212545	12097	829789764	23267728	22968186	755641	0.415161450890082	0.519361313944855	22889907.5	829411943.5	22590365.5	cela1_red_10_22212545	cela1_red_10_22968186
LG12.c.317.6	Both	-2818.05905803242	-2815.69409591986	12	317	6	322	12093	829187486	22665450	22365908	12098	829864468	23342432	23042890	676982	4.72992422512925	0.0296421911681223	23003941	829525977	22704399	cela1_red_10_22365908	cela1_sika_10_23042890
LG12.c.317.6	Male	-884.66173075135	-883.657603323891	12	317	6	322	12093	829187486	22665450	22365908	12098	829864468	23342432	23042890	676982	2.00825485491737	0.156445189197375	23003941	829525977	22704399	cela1_red_10_22365908	cela1_sika_10_23042890
LG12.c.317.6	Female	-1896.56847372415	-1894.4354034869	12	317	6	322	12093	829187486	22665450	22365908	12098	829864468	23342432	23042890	676982	4.26614047449539	0.038879142682256	23003941	829525977	22704399	cela1_red_10_22365908	cela1_sika_10_23042890
LG12.c.318.6	Both	-2818.06180364624	-2816.28011894534	12	318	6	323	12094	829217360	22695324	22395782	12099	829883178	23361142	23061600	665818	3.56336940179972	0.0590677267342019	23028233	829550269	22728691	cela1_red_10_22395782	cela1_red_10_23061600
LG12.c.318.6	Male	-884.66198060007	-882.845409545159	12	318	6	323	12094	829217360	22695324	22395782	12099	829883178	23361142	23061600	665818	3.63314210982344	0.0566397881966352	23028233	829550269	22728691	cela1_red_10_22395782	cela1_red_10_23061600
LG12.c.318.6	Female	-1896.56907183162	-1895.05449845425	12	318	6	323	12094	829217360	22695324	22395782	12099	829883178	23361142	23061600	665818	3.02914675473448	0.0817810126941397	23028233	829550269	22728691	cela1_red_10_22395782	cela1_red_10_23061600
LG12.c.319.6	Both	-2818.06166643317	-2816.46093080548	12	319	6	324	12095	829245916	22723880	22424338	12100	829908178	23386142	25661750	662262	3.20147125537642	0.073572057262179	23055011	829577047	24043044	cela1_red_10_22424338	cela1_red_10_25661750
LG12.c.319.6	Male	-884.661103516353	-884.661103747854	12	319	6	324	12095	829245916	22723880	22424338	12100	829908178	23386142	25661750	662262	-4.63000560557703e-07	1	23055011	829577047	24043044	cela1_red_10_22424338	cela1_red_10_25661750
LG12.c.319.6	Female	-1896.56920070574	-1895.26395026732	12	319	6	324	12095	829245916	22723880	22424338	12100	829908178	23386142	25661750	662262	2.61050087685726	0.106158227936943	23055011	829577047	24043044	cela1_red_10_22424338	cela1_red_10_25661750
LG12.c.320.6	Both	-2818.06118255841	-2816.43113998093	12	320	6	325	12096	829272271	22750235	22450693	12101	830044112	23522076	25797684	771841	3.2600851549505	0.0709854400278356	23136155.5	829658191.5	24124188.5	cela1_red_10_22450693	cela1_red_10_25797684
LG12.c.320.6	Male	-884.661057128058	-884.661059621052	12	320	6	325	12096	829272271	22750235	22450693	12101	830044112	23522076	25797684	771841	-4.98598637932446e-06	1	23136155.5	829658191.5	24124188.5	cela1_red_10_22450693	cela1_red_10_25797684
LG12.c.320.6	Female	-1896.56845670348	-1895.10290310229	12	320	6	325	12096	829272271	22750235	22450693	12101	830044112	23522076	25797684	771841	2.93110720237792	0.0868878850613658	23136155.5	829658191.5	24124188.5	cela1_red_10_22450693	cela1_red_10_25797684
LG12.c.321.6	Both	-2818.0606180643	-2817.12803484653	12	321	6	326	12097	829789764	23267728	22968186	12102	830074660	23552624	25828232	284896	1.86516643555206	0.172029701856528	23410176	829932212	24398209	cela1_red_10_22968186	cela1_red_10_25828232
LG12.c.321.6	Male	-884.66115853696	-884.661158642193	12	321	6	326	12097	829789764	23267728	22968186	12102	830074660	23552624	25828232	284896	-2.10465486816247e-07	1	23410176	829932212	24398209	cela1_red_10_22968186	cela1_red_10_25828232
LG12.c.321.6	Female	-1896.56760199027	-1896.31491889888	12	321	6	326	12097	829789764	23267728	22968186	12102	830074660	23552624	25828232	284896	0.505366182790112	0.477151709931503	23410176	829932212	24398209	cela1_red_10_22968186	cela1_red_10_25828232
LG12.c.322.6	Both	-2818.06036620406	-2815.229504023	12	322	6	327	12098	829864468	23342432	23042890	12103	830177011	23654975	25930583	312543	5.66172436212855	0.017339067825306	23498703.5	830020739.5	24486736.5	cela1_sika_10_23042890	cela1_red_10_25930583
LG12.c.322.6	Male	-884.661125630216	-884.661125859011	12	322	6	327	12098	829864468	23342432	23042890	12103	830177011	23654975	25930583	312543	-4.57588612334803e-07	1	23498703.5	830020739.5	24486736.5	cela1_sika_10_23042890	cela1_red_10_25930583
LG12.c.322.6	Female	-1896.56822553555	-1894.68545404756	12	322	6	327	12098	829864468	23342432	23042890	12103	830177011	23654975	25930583	312543	3.76554297598113	0.0523188688970385	23498703.5	830020739.5	24486736.5	cela1_sika_10_23042890	cela1_red_10_25930583
LG12.c.323.6	Both	-2818.05708230098	-2816.40711971341	12	323	6	328	12099	829883178	23361142	23061600	12104	830210632	23688596	25964204	327454	3.29992517514165	0.0692830391245203	23524869	830046905	24512902	cela1_red_10_23061600	cela1_red_10_25964204
LG12.c.323.6	Male	-884.660987247507	-884.660988240639	12	323	6	328	12099	829883178	23361142	23061600	12104	830210632	23688596	25964204	327454	-1.98626480596431e-06	1	23524869	830046905	24512902	cela1_red_10_23061600	cela1_red_10_25964204
LG12.c.323.6	Female	-1896.5665067122	-1895.49414643671	12	323	6	328	12099	829883178	23361142	23061600	12104	830210632	23688596	25964204	327454	2.14472055097167	0.143061083719855	23524869	830046905	24512902	cela1_red_10_23061600	cela1_red_10_25964204
LG12.c.324.6	Both	-2818.0546553565	-2818.05465675376	12	324	6	329	12100	829908178	23386142	25661750	12105	830251677	23729641	26005249	343499	-2.79451887763571e-06	1	23557891.5	830079927.5	25833499.5	cela1_red_10_25661750	cela1_red_10_26005249
LG12.c.324.6	Male	-884.660565845114	-884.660567870674	12	324	6	329	12100	829908178	23386142	25661750	12105	830251677	23729641	26005249	343499	-4.0511210954719e-06	1	23557891.5	830079927.5	25833499.5	cela1_red_10_25661750	cela1_red_10_26005249
LG12.c.324.6	Female	-1896.56639954363	-1896.5663901672	12	324	6	329	12100	829908178	23386142	25661750	12105	830251677	23729641	26005249	343499	1.8752862160909e-05	0.996544805618523	23557891.5	830079927.5	25833499.5	cela1_red_10_25661750	cela1_red_10_26005249
LG12.c.325.6	Both	-2818.05517036436	-2818.0551706147	12	325	6	330	12101	830044112	23522076	25797684	12106	830287903	23765867	26041475	243791	-5.00684109283611e-07	1	23643971.5	830166007.5	25919579.5	cela1_red_10_25797684	cela1_red_10_26041475
LG12.c.325.6	Male	-884.660666428769	-884.660667832333	12	325	6	330	12101	830044112	23522076	25797684	12106	830287903	23765867	26041475	243791	-2.80712720268639e-06	1	23643971.5	830166007.5	25919579.5	cela1_red_10_25797684	cela1_red_10_26041475
LG12.c.325.6	Female	-1896.56635035842	-1896.56635164266	12	325	6	330	12101	830044112	23522076	25797684	12106	830287903	23765867	26041475	243791	-2.56849079960375e-06	1	23643971.5	830166007.5	25919579.5	cela1_red_10_25797684	cela1_red_10_26041475
LG12.c.326.6	Both	-2818.05652959801	-2818.03425192226	12	326	6	331	12102	830074660	23552624	25828232	12107	830352700	23830664	26106272	278040	0.0445553515019128	0.832823764844647	23691644	830213680	25967252	cela1_red_10_25828232	cela1_red_10_26106272
LG12.c.326.6	Male	-884.660897024367	-884.660897476305	12	326	6	331	12102	830074660	23552624	25828232	12107	830352700	23830664	26106272	278040	-9.03875388758024e-07	1	23691644	830213680	25967252	cela1_red_10_25828232	cela1_red_10_26106272
LG12.c.326.6	Female	-1896.56739626669	-1896.52877724808	12	326	6	331	12102	830074660	23552624	25828232	12107	830352700	23830664	26106272	278040	0.0772380372136467	0.781075827392206	23691644	830213680	25967252	cela1_red_10_25828232	cela1_red_10_26106272
LG12.c.327.6	Both	-2818.05533206618	-2818.05533370137	12	327	6	332	12103	830177011	23654975	25930583	12108	830379758	23857722	26133330	202747	-3.27037378156092e-06	1	23756348.5	830278384.5	26031956.5	cela1_red_10_25930583	cela1_red_10_26133330
LG12.c.327.6	Male	-884.661101822156	-884.66110213257	12	327	6	332	12103	830177011	23654975	25930583	12108	830379758	23857722	26133330	202747	-6.20829496256192e-07	1	23756348.5	830278384.5	26031956.5	cela1_red_10_25930583	cela1_red_10_26133330
LG12.c.327.6	Female	-1896.56694042373	-1896.56001998537	12	327	6	332	12103	830177011	23654975	25930583	12108	830379758	23857722	26133330	202747	0.0138408767215878	0.906347160456469	23756348.5	830278384.5	26031956.5	cela1_red_10_25930583	cela1_red_10_26133330
LG12.c.328.6	Both	-2818.05718324734	-2817.23920312902	12	328	6	333	12104	830210632	23688596	25964204	12109	830387324	23865288	26140896	176692	1.63596023664559	0.200880642057022	23776942	830298978	26052550	cela1_red_10_25964204	cela1_red_10_26140896
LG12.c.328.6	Male	-884.661086015477	-884.661086247915	12	328	6	333	12104	830210632	23688596	25964204	12109	830387324	23865288	26140896	176692	-4.64874574390706e-07	1	23776942	830298978	26052550	cela1_red_10_25964204	cela1_red_10_26140896
LG12.c.328.6	Female	-1896.56769004203	-1895.86324042009	12	328	6	333	12104	830210632	23688596	25964204	12109	830387324	23865288	26140896	176692	1.4088992438783	0.235239210973233	23776942	830298978	26052550	cela1_red_10_25964204	cela1_red_10_26140896
LG12.c.329.6	Both	-2818.05722796508	-2817.15517388204	12	329	6	334	12105	830251677	23729641	26005249	12110	830414579	23892543	26168151	162902	1.80410816609401	0.17921663004628	23811092	830333128	26086700	cela1_red_10_26005249	cela1_red_10_26168151
LG12.c.329.6	Male	-884.661112268951	-884.66111266398	12	329	6	334	12105	830251677	23729641	26005249	12110	830414579	23892543	26168151	162902	-7.90057583799353e-07	1	23811092	830333128	26086700	cela1_red_10_26005249	cela1_red_10_26168151
LG12.c.329.6	Female	-1896.56783661853	-1895.68412990402	12	329	6	334	12105	830251677	23729641	26005249	12110	830414579	23892543	26168151	162902	1.76741342900823	0.183702511765637	23811092	830333128	26086700	cela1_red_10_26005249	cela1_red_10_26168151
LG12.c.330.6	Both	-2818.06151485725	-2816.27656665509	12	330	6	335	12106	830287903	23765867	26041475	12111	830622626	24100590	26376198	334723	3.56989640431129	0.0588359816708041	23933228.5	830455264.5	26208836.5	cela1_red_10_26041475	cela1_red_10_26376198
LG12.c.330.6	Male	-884.661083165573	-884.661083634788	12	330	6	335	12106	830287903	23765867	26041475	12111	830622626	24100590	26376198	334723	-9.38429366215132e-07	1	23933228.5	830455264.5	26208836.5	cela1_red_10_26041475	cela1_red_10_26376198
LG12.c.330.6	Female	-1896.57080316965	-1895.16848188896	12	330	6	335	12106	830287903	23765867	26041475	12111	830622626	24100590	26376198	334723	2.80464256138293	0.093991790450745	23933228.5	830455264.5	26208836.5	cela1_red_10_26041475	cela1_red_10_26376198
LG12.c.331.6	Both	-2818.06101782523	-2817.2612648283	12	331	6	336	12107	830352700	23830664	26106272	12112	830988050	24466014	26741622	635350	1.59950599385775	0.205973232650091	24148339	830670375	26423947	cela1_red_10_26106272	cela1_red_10_26741622
LG12.c.331.6	Male	-884.661332271249	-884.65915697061	12	331	6	336	12107	830352700	23830664	26106272	12112	830988050	24466014	26741622	635350	0.00435060127688303	0.947410397611977	24148339	830670375	26423947	cela1_red_10_26106272	cela1_red_10_26741622
LG12.c.331.6	Female	-1896.57085606483	-1895.69401313204	12	331	6	336	12107	830352700	23830664	26106272	12112	830988050	24466014	26741622	635350	1.75368586558761	0.185414037895716	24148339	830670375	26423947	cela1_red_10_26106272	cela1_red_10_26741622
LG12.c.332.6	Both	-2818.05917253292	-2816.02031832851	12	332	6	337	12108	830379758	23857722	26133330	12113	830997161	24475125	26750733	617403	4.07770840880585	0.0434525521743638	24166423.5	830688459.5	26442031.5	cela1_red_10_26133330	cela1_red_10_26750733
LG12.c.332.6	Male	-884.661006389821	-884.661007534319	12	332	6	337	12108	830379758	23857722	26133330	12113	830997161	24475125	26750733	617403	-2.28899648391234e-06	1	24166423.5	830688459.5	26442031.5	cela1_red_10_26133330	cela1_red_10_26750733
LG12.c.332.6	Female	-1896.56971911734	-1895.03621239943	12	332	6	337	12108	830379758	23857722	26133330	12113	830997161	24475125	26750733	617403	3.06701343581881	0.0798961280550936	24166423.5	830688459.5	26442031.5	cela1_red_10_26133330	cela1_red_10_26750733
LG12.c.333.6	Both	-2818.05934191946	-2815.89956642232	12	333	6	338	12109	830387324	23865288	26140896	12114	831042019	24519983	26795591	654695	4.31955099428706	0.0376768626321612	24192635.5	830714671.5	26468243.5	cela1_red_10_26140896	cela1_red_10_26795591
LG12.c.333.6	Male	-884.660799338269	-884.660801474392	12	333	6	338	12109	830387324	23865288	26140896	12114	831042019	24519983	26795591	654695	-4.27224631494028e-06	1	24192635.5	830714671.5	26468243.5	cela1_red_10_26140896	cela1_red_10_26795591
LG12.c.333.6	Female	-1896.56955049682	-1894.97938202014	12	333	6	338	12109	830387324	23865288	26140896	12114	831042019	24519983	26795591	654695	3.18033695334725	0.0745293592467047	24192635.5	830714671.5	26468243.5	cela1_red_10_26140896	cela1_red_10_26795591
LG12.c.334.6	Both	-2818.05550625552	-2816.99020370063	12	334	6	339	12110	830414579	23892543	26168151	12115	831178785	24656749	26932357	764206	2.13060510979722	0.144383748136956	24274646	830796682	26550254	cela1_red_10_26168151	cela1_red_10_26932357
LG12.c.334.6	Male	-884.66090335478	-884.660905006964	12	334	6	339	12110	830414579	23892543	26168151	12115	831178785	24656749	26932357	764206	-3.30436841977644e-06	1	24274646	830796682	26550254	cela1_red_10_26168151	cela1_red_10_26932357
LG12.c.334.6	Female	-1896.56602207221	-1896.06856079399	12	334	6	339	12110	830414579	23892543	26168151	12115	831178785	24656749	26932357	764206	0.994922556428719	0.318542227559561	24274646	830796682	26550254	cela1_red_10_26168151	cela1_red_10_26932357
LG12.c.335.6	Both	-2818.05831327312	-2816.19860644182	12	335	6	340	12111	830622626	24100590	26376198	12116	831222653	24700617	26976225	600027	3.71941366261035	0.0537832543330287	24400603.5	830922639.5	26676211.5	cela1_red_10_26376198	cela1_red_10_26976225
LG12.c.335.6	Male	-884.66098922722	-884.660990425545	12	335	6	340	12111	830622626	24100590	26376198	12116	831222653	24700617	26976225	600027	-2.39664905166137e-06	1	24400603.5	830922639.5	26676211.5	cela1_red_10_26376198	cela1_red_10_26976225
LG12.c.335.6	Female	-1896.56714269405	-1895.28919562864	12	335	6	340	12111	830622626	24100590	26376198	12116	831222653	24700617	26976225	600027	2.55589413082635	0.109883631675785	24400603.5	830922639.5	26676211.5	cela1_red_10_26376198	cela1_red_10_26976225
LG12.c.336.6	Both	-2818.05642746484	-2818.05549988313	12	336	6	341	12112	830988050	24466014	26741622	12117	831248607	24726571	27002179	260557	0.00185516341571201	0.965644451822088	24596292.5	831118328.5	26871900.5	cela1_red_10_26741622	cela1_sika_10_27002179
LG12.c.336.6	Male	-884.661174827969	-884.661175105566	12	336	6	341	12112	830988050	24466014	26741622	12117	831248607	24726571	27002179	260557	-5.55193992113345e-07	1	24596292.5	831118328.5	26871900.5	cela1_red_10_26741622	cela1_sika_10_27002179
LG12.c.336.6	Female	-1896.56491544069	-1896.56492219864	12	336	6	341	12112	830988050	24466014	26741622	12117	831248607	24726571	27002179	260557	-1.35158870762098e-05	1	24596292.5	831118328.5	26871900.5	cela1_red_10_26741622	cela1_sika_10_27002179
LG12.c.337.6	Both	-2818.0567633466	-2818.05430739684	12	337	6	342	12113	830997161	24475125	26750733	12118	831265275	24743239	27018847	268114	0.00491189952390414	0.944126049337877	24609182	831131218	26884790	cela1_red_10_26750733	cela1_red_10_27018847
LG12.c.337.6	Male	-884.661017702743	-884.661018721128	12	337	6	342	12113	830997161	24475125	26750733	12118	831265275	24743239	27018847	268114	-2.03677018362214e-06	1	24609182	831131218	26884790	cela1_red_10_26750733	cela1_red_10_27018847
LG12.c.337.6	Female	-1896.56492227623	-1896.56492898635	12	337	6	342	12113	830997161	24475125	26750733	12118	831265275	24743239	27018847	268114	-1.34202305162034e-05	1	24609182	831131218	26884790	cela1_red_10_26750733	cela1_red_10_27018847
LG12.c.338.6	Both	-2818.05646023071	-2818.05613962511	12	338	6	343	12114	831042019	24519983	26795591	12119	831326347	24804311	27079919	284328	0.000641211205220316	0.979798007636983	24662147	831184183	26937755	cela1_red_10_26795591	cela1_red_10_27079919
LG12.c.338.6	Male	-884.660981010212	-884.660982165477	12	338	6	343	12114	831042019	24519983	26795591	12119	831326347	24804311	27079919	284328	-2.3105308173399e-06	1	24662147	831184183	26937755	cela1_red_10_26795591	cela1_red_10_27079919
LG12.c.338.6	Female	-1896.56501950414	-1896.56502507465	12	338	6	343	12114	831042019	24519983	26795591	12119	831326347	24804311	27079919	284328	-1.11410186036665e-05	1	24662147	831184183	26937755	cela1_red_10_26795591	cela1_red_10_27079919
LG12.c.339.6	Both	-2818.05870513216	-2818.00718413168	12	339	6	344	12115	831178785	24656749	26932357	12120	831353467	24831431	27107039	174682	0.103042000947426	0.748209209386946	24744090	831266126	27019698	cela1_red_10_26932357	cela1_red_10_27107039
LG12.c.339.6	Male	-884.661167569038	-884.661167868839	12	339	6	344	12115	831178785	24656749	26932357	12120	831353467	24831431	27107039	174682	-5.99602117290488e-07	1	24744090	831266126	27019698	cela1_red_10_26932357	cela1_red_10_27107039
LG12.c.339.6	Female	-1896.56561158406	-1896.56561477458	12	339	6	344	12115	831178785	24656749	26932357	12120	831353467	24831431	27107039	174682	-6.38104802419548e-06	1	24744090	831266126	27019698	cela1_red_10_26932357	cela1_red_10_27107039
LG12.c.340.6	Both	-2818.05915986279	-2817.9468924225	12	340	6	345	12116	831222653	24700617	26976225	12121	831399885	24877849	27153457	177232	0.224534880579995	0.635606080268855	24789233	831311269	27064841	cela1_red_10_26976225	cela1_red_10_27153457
LG12.c.340.6	Male	-884.661070002129	-884.661070740545	12	340	6	345	12116	831222653	24700617	26976225	12121	831399885	24877849	27153457	177232	-1.47683113027597e-06	1	24789233	831311269	27064841	cela1_red_10_26976225	cela1_red_10_27153457
LG12.c.340.6	Female	-1896.56612542983	-1896.56612645957	12	340	6	345	12116	831222653	24700617	26976225	12121	831399885	24877849	27153457	177232	-2.0594766283466e-06	1	24789233	831311269	27064841	cela1_red_10_26976225	cela1_red_10_27153457
LG12.c.341.6	Both	-2818.0562153327	-2818.05190968007	12	341	6	346	12117	831248607	24726571	27002179	12122	831474423	24952387	27227995	225816	0.00861130524845066	0.926064740038977	24839479	831361515	27115087	cela1_sika_10_27002179	cela1_red_10_27227995
LG12.c.341.6	Male	-884.66101524737	-884.661015934217	12	341	6	346	12117	831248607	24726571	27002179	12122	831474423	24952387	27227995	225816	-1.37369511321594e-06	1	24839479	831361515	27115087	cela1_sika_10_27002179	cela1_red_10_27227995
LG12.c.341.6	Female	-1896.56495517932	-1896.56495818994	12	341	6	346	12117	831248607	24726571	27002179	12122	831474423	24952387	27227995	225816	-6.02123964199563e-06	1	24839479	831361515	27115087	cela1_sika_10_27002179	cela1_red_10_27227995
LG12.c.342.6	Both	-2818.05361323833	-2818.05362687417	12	342	6	347	12118	831265275	24743239	27018847	12123	831521901	24999865	27275473	256626	-2.72716688414221e-05	1	24871552	831393588	27147160	cela1_red_10_27018847	cela1_red_10_27275473
LG12.c.342.6	Male	-884.6608603848	-884.660861480027	12	342	6	347	12118	831265275	24743239	27018847	12123	831521901	24999865	27275473	256626	-2.19045364246995e-06	1	24871552	831393588	27147160	cela1_red_10_27018847	cela1_red_10_27275473
LG12.c.342.6	Female	-1896.56475452674	-1896.56476715098	12	342	6	347	12118	831265275	24743239	27018847	12123	831521901	24999865	27275473	256626	-2.52484719567292e-05	1	24871552	831393588	27147160	cela1_red_10_27018847	cela1_red_10_27275473
LG12.c.343.6	Both	-2818.05312323206	-2818.05312805478	12	343	6	348	12119	831326347	24804311	27079919	12124	831581161	25059125	27334733	254814	-9.64543869486079e-06	1	24931718	831453754	27207326	cela1_red_10_27079919	cela1_red_10_27334733
LG12.c.343.6	Male	-884.66081984226	-884.660821215512	12	343	6	348	12119	831326347	24804311	27079919	12124	831581161	25059125	27334733	254814	-2.74650324172399e-06	1	24931718	831453754	27207326	cela1_red_10_27079919	cela1_red_10_27334733
LG12.c.343.6	Female	-1896.56476725666	-1896.56477811061	12	343	6	348	12119	831326347	24804311	27079919	12124	831581161	25059125	27334733	254814	-2.17078950299765e-05	1	24931718	831453754	27207326	cela1_red_10_27079919	cela1_red_10_27334733
LG12.c.344.6	Both	-2818.05736098694	-2817.88391334921	12	344	6	349	12120	831353467	24831431	27107039	12125	831714008	25191972	27467580	360541	0.346895275459246	0.555875923024657	25011701.5	831533737.5	27287309.5	cela1_red_10_27107039	cela1_red_10_27467580
LG12.c.344.6	Male	-884.660802828877	-884.660804451433	12	344	6	349	12120	831353467	24831431	27107039	12125	831714008	25191972	27467580	360541	-3.24511211147183e-06	1	25011701.5	831533737.5	27287309.5	cela1_red_10_27107039	cela1_red_10_27467580
LG12.c.344.6	Female	-1896.56869162704	-1895.98931111794	12	344	6	349	12120	831353467	24831431	27107039	12125	831714008	25191972	27467580	360541	1.15876101819322	0.281722642608954	25011701.5	831533737.5	27287309.5	cela1_red_10_27107039	cela1_red_10_27467580
LG12.c.345.6	Both	-2818.05588288739	-2817.53551969714	12	345	6	350	12121	831399885	24877849	27153457	12126	831746398	25224362	27499970	346513	1.04072638048638	0.307652595197563	25051105.5	831573141.5	27326713.5	cela1_red_10_27153457	cela1_red_10_27499970
LG12.c.345.6	Male	-884.660477453895	-884.660479854004	12	345	6	350	12121	831399885	24877849	27153457	12126	831746398	25224362	27499970	346513	-4.80021708426648e-06	1	25051105.5	831573141.5	27326713.5	cela1_red_10_27153457	cela1_red_10_27499970
LG12.c.345.6	Female	-1896.56878391172	-1894.93156920855	12	345	6	350	12121	831399885	24877849	27153457	12126	831746398	25224362	27499970	346513	3.27442940633864	0.0703673921142814	25051105.5	831573141.5	27326713.5	cela1_red_10_27153457	cela1_red_10_27499970
LG12.c.346.6	Both	-2818.0557924141	-2818.01247548024	12	346	6	351	12122	831474423	24952387	27227995	12127	831804151	25282115	27557723	329728	0.0866338677324165	0.768500923822655	25117251	831639287	27392859	cela1_red_10_27227995	cela1_red_10_27557723
LG12.c.346.6	Male	-884.660487644815	-884.660490061888	12	346	6	351	12122	831474423	24952387	27227995	12127	831804151	25282115	27557723	329728	-4.83414623886347e-06	1	25117251	831639287	27392859	cela1_red_10_27227995	cela1_red_10_27557723
LG12.c.346.6	Female	-1896.56877043352	-1895.71897326713	12	346	6	351	12122	831474423	24952387	27227995	12127	831804151	25282115	27557723	329728	1.69959433276972	0.192341038080884	25117251	831639287	27392859	cela1_red_10_27227995	cela1_red_10_27557723
LG12.c.347.6	Both	-2818.0558030094	-2817.72427833145	12	347	6	352	12123	831521901	24999865	27275473	12128	831815770	25293734	27569342	293869	0.663049355898693	0.415485465704563	25146799.5	831668835.5	27422407.5	cela1_red_10_27275473	cela1_red_10_27569342
LG12.c.347.6	Male	-884.66035035296	-884.660353236873	12	347	6	352	12123	831521901	24999865	27275473	12128	831815770	25293734	27569342	293869	-5.76782622374594e-06	1	25146799.5	831668835.5	27422407.5	cela1_red_10_27275473	cela1_red_10_27569342
LG12.c.347.6	Female	-1896.56861519149	-1895.38477488991	12	347	6	352	12123	831521901	24999865	27275473	12128	831815770	25293734	27569342	293869	2.3676806031508	0.123870971984309	25146799.5	831668835.5	27422407.5	cela1_red_10_27275473	cela1_red_10_27569342
LG12.c.348.6	Both	-2818.05777503129	-2817.65965589435	12	348	6	353	12124	831581161	25059125	27334733	12129	831883960	25361924	27637532	302799	0.796238273891504	0.372220448975444	25210524.5	831732560.5	27486132.5	cela1_red_10_27334733	cela1_sika_10_27637532
LG12.c.348.6	Male	-884.6613956035	-884.660894636596	12	348	6	353	12124	831581161	25059125	27334733	12129	831883960	25361924	27637532	302799	0.0010019338078564	0.9747485070865	25210524.5	831732560.5	27486132.5	cela1_red_10_27334733	cela1_sika_10_27637532
LG12.c.348.6	Female	-1896.5680352687	-1896.14629967823	12	348	6	353	12124	831581161	25059125	27334733	12129	831883960	25361924	27637532	302799	0.84347118093001	0.358405894783976	25210524.5	831732560.5	27486132.5	cela1_red_10_27334733	cela1_sika_10_27637532
LG12.c.349.6	Both	-2818.0594483602	-2816.68110192435	12	349	6	354	12125	831714008	25191972	27467580	12130	831932150	25410114	27685722	218142	2.75669287169512	0.0968482555015761	25301043	831823079	27576651	cela1_red_10_27467580	cela1_red_10_27685722
LG12.c.349.6	Male	-884.661474896899	-884.654261974237	12	349	6	354	12125	831714008	25191972	27467580	12130	831932150	25410114	27685722	218142	0.0144258453253769	0.904397879903295	25301043	831823079	27576651	cela1_red_10_27467580	cela1_red_10_27685722
LG12.c.349.6	Female	-1896.56930509548	-1895.24965469234	12	349	6	354	12125	831714008	25191972	27467580	12130	831932150	25410114	27685722	218142	2.63930080627915	0.104249415272388	25301043	831823079	27576651	cela1_red_10_27467580	cela1_red_10_27685722
LG12.c.350.6	Both	-2818.0556255935	-2818.04440233885	12	350	6	355	12126	831746398	25224362	27499970	12131	832144120	25622084	27897692	397722	0.0224465093015169	0.880905374015892	25423223	831945259	27698831	cela1_red_10_27499970	cela1_red_10_27897692
LG12.c.350.6	Male	-884.661559278692	-884.575672217372	12	350	6	355	12126	831746398	25224362	27499970	12131	832144120	25622084	27897692	397722	0.171774122639135	0.678539878040123	25423223	831945259	27698831	cela1_red_10_27499970	cela1_red_10_27897692
LG12.c.350.6	Female	-1896.56545858815	-1896.56545983939	12	350	6	355	12126	831746398	25224362	27499970	12131	832144120	25622084	27897692	397722	-2.50247376243351e-06	1	25423223	831945259	27698831	cela1_red_10_27499970	cela1_red_10_27897692
LG12.c.351.6	Both	-2818.05757760929	-2818.00133708195	12	351	6	356	12127	831804151	25282115	27557723	12132	832145019	25622983	27898591	340868	0.112481054688942	0.737336979532404	25452549	831974585	27728157	cela1_red_10_27557723	cela1_sika_10_27898591
LG12.c.351.6	Male	-884.662553523824	-884.10308408698	12	351	6	356	12127	831804151	25282115	27557723	12132	832145019	25622983	27898591	340868	1.11893887368751	0.290147056642748	25452549	831974585	27728157	cela1_red_10_27557723	cela1_sika_10_27898591
LG12.c.351.6	Female	-1896.56592488922	-1896.5659255824	12	351	6	356	12127	831804151	25282115	27557723	12132	832145019	25622983	27898591	340868	-1.38636596602737e-06	1	25452549	831974585	27728157	cela1_red_10_27557723	cela1_sika_10_27898591
LG12.c.352.6	Both	-2818.0603958948	-2817.85330609666	12	352	6	357	12128	831815770	25293734	27569342	12133	832148597	25626561	27902169	332827	0.414179596277791	0.519855694304635	25460147.5	831982183.5	27735755.5	cela1_red_10_27569342	cela1_red_10_27902169
LG12.c.352.6	Male	-884.663555516339	-883.738388465083	12	352	6	357	12128	831815770	25293734	27569342	12133	832148597	25626561	27902169	332827	1.85033410251208	0.173744541260742	25460147.5	831982183.5	27735755.5	cela1_red_10_27569342	cela1_red_10_27902169
LG12.c.352.6	Female	-1896.5668894009	-1896.56382453982	12	352	6	357	12128	831815770	25293734	27569342	12133	832148597	25626561	27902169	332827	0.00612972216003982	0.937595349737536	25460147.5	831982183.5	27735755.5	cela1_red_10_27569342	cela1_red_10_27902169
LG12.c.353.6	Both	-2818.06150554475	-2817.8218933723	12	353	6	358	12129	831883960	25361924	27637532	12134	832150602	25628566	27904174	266642	0.479224344901922	0.488773866708395	25495245	832017281	27770853	cela1_sika_10_27637532	cela1_sika_10_27904174
LG12.c.353.6	Male	-884.663762939381	-883.693319516649	12	353	6	358	12129	831883960	25361924	27637532	12134	832150602	25628566	27904174	266642	1.94088684546455	0.163572274161011	25495245	832017281	27770853	cela1_sika_10_27637532	cela1_sika_10_27904174
LG12.c.353.6	Female	-1896.56749997435	-1896.54949906477	12	353	6	358	12129	831883960	25361924	27637532	12134	832150602	25628566	27904174	266642	0.0360018191663585	0.849511735650052	25495245	832017281	27770853	cela1_sika_10_27637532	cela1_sika_10_27904174
LG12.c.354.6	Both	-2818.05992823093	-2817.89323146054	12	354	6	359	12130	831932150	25410114	27685722	12135	832193180	25671144	27946752	261030	0.333393540776342	0.563667647897544	25540629	832062665	27816237	cela1_red_10_27685722	cela1_red_10_27946752
LG12.c.354.6	Male	-884.662721570082	-884.082681054367	12	354	6	359	12130	831932150	25410114	27685722	12135	832193180	25671144	27946752	261030	1.16008103142985	0.281448735862883	25540629	832062665	27816237	cela1_red_10_27685722	cela1_red_10_27946752
LG12.c.354.6	Female	-1896.5673946571	-1896.54965821119	12	354	6	359	12130	831932150	25410114	27685722	12135	832193180	25671144	27946752	261030	0.0354728918205183	0.850608182685042	25540629	832062665	27816237	cela1_red_10_27685722	cela1_red_10_27946752
LG12.c.355.6	Both	-2818.05849193998	-2817.99365066327	12	355	6	360	12131	832144120	25622084	27897692	12136	832220406	25698370	27973978	76286	0.12968255341093	0.718761405661376	25660227	832182263	27935835	cela1_red_10_27897692	cela1_red_10_27973978
LG12.c.355.6	Male	-884.662507960408	-884.186207691774	12	355	6	360	12131	832144120	25622084	27897692	12136	832220406	25698370	27973978	76286	0.952600537267244	0.32905823514151	25660227	832182263	27935835	cela1_red_10_27897692	cela1_red_10_27973978
LG12.c.355.6	Female	-1896.56621797996	-1896.56621896139	12	355	6	360	12131	832144120	25622084	27897692	12136	832220406	25698370	27973978	76286	-1.96284599951468e-06	1	25660227	832182263	27935835	cela1_red_10_27897692	cela1_red_10_27973978
LG12.c.356.6	Both	-2818.06018033822	-2817.87331490489	12	356	6	361	12132	832145019	25622983	27898591	12137	832255285	25733249	28008857	110266	0.37373086664229	0.540977616513814	25678116	832200152	27953724	cela1_sika_10_27898591	cela1_red_10_28008857
LG12.c.356.6	Male	-884.662717395094	-884.030064078021	12	356	6	361	12132	832145019	25622983	27898591	12137	832255285	25733249	28008857	110266	1.26530663414565	0.260649002185981	25678116	832200152	27953724	cela1_sika_10_27898591	cela1_red_10_28008857
LG12.c.356.6	Female	-1896.56647167967	-1896.56647193899	12	356	6	361	12132	832145019	25622983	27898591	12137	832255285	25733249	28008857	110266	-5.18649358127732e-07	1	25678116	832200152	27953724	cela1_sika_10_27898591	cela1_red_10_28008857
LG12.c.357.6	Both	-2818.05765071316	-2818.01683867291	12	357	6	362	12133	832148597	25626561	27902169	12138	832345265	25823229	28098837	196668	0.0816240805006601	0.775108453642493	25724895	832246931	28000503	cela1_red_10_27902169	cela1_red_10_28098837
LG12.c.357.6	Male	-884.661747054876	-884.438809894818	12	357	6	362	12133	832148597	25626561	27902169	12138	832345265	25823229	28098837	196668	0.445874320116445	0.504300713488219	25724895	832246931	28000503	cela1_red_10_27902169	cela1_red_10_28098837
LG12.c.357.6	Female	-1896.56573035674	-1896.56573191082	12	357	6	362	12133	832148597	25626561	27902169	12138	832345265	25823229	28098837	196668	-3.10816039927886e-06	1	25724895	832246931	28000503	cela1_red_10_27902169	cela1_red_10_28098837
LG12.c.358.6	Both	-2818.05413652414	-2818.0541392004	12	358	6	363	12134	832150602	25628566	27904174	12139	832426099	25904063	28179671	275497	-5.35250546818133e-06	1	25766314.5	832288350.5	28041922.5	cela1_sika_10_27904174	cela1_red_10_28179671
LG12.c.358.6	Male	-884.660695799693	-884.660697277824	12	358	6	363	12134	832150602	25628566	27904174	12139	832426099	25904063	28179671	275497	-2.95626250590431e-06	1	25766314.5	832288350.5	28041922.5	cela1_sika_10_27904174	cela1_red_10_28179671
LG12.c.358.6	Female	-1896.56461724348	-1896.56462072033	12	358	6	363	12134	832150602	25628566	27904174	12139	832426099	25904063	28179671	275497	-6.95370908943005e-06	1	25766314.5	832288350.5	28041922.5	cela1_sika_10_27904174	cela1_red_10_28179671
LG12.c.359.6	Both	-2818.05636871461	-2818.04258781344	12	359	6	364	12135	832193180	25671144	27946752	12140	832510063	25988027	28263635	316883	0.0275618023533752	0.86814319712441	25829585.5	832351621.5	28105193.5	cela1_red_10_27946752	cela1_red_10_28263635
LG12.c.359.6	Male	-884.661298731813	-884.509467264059	12	359	6	364	12135	832193180	25671144	27946752	12140	832510063	25988027	28263635	316883	0.303662935507873	0.581595149518347	25829585.5	832351621.5	28105193.5	cela1_red_10_27946752	cela1_red_10_28263635
LG12.c.359.6	Female	-1896.56531797663	-1896.56532007286	12	359	6	364	12135	832193180	25671144	27946752	12140	832510063	25988027	28263635	316883	-4.19247135141632e-06	1	25829585.5	832351621.5	28105193.5	cela1_red_10_27946752	cela1_red_10_28263635
LG12.c.360.6	Both	-2818.05684243439	-2818.00920736064	12	360	6	365	12136	832220406	25698370	27973978	12141	832510138	25988102	28263710	289732	0.0952701475043796	0.757581219530614	25843236	832365272	28118844	cela1_red_10_27973978	cela1_red_10_28263710
LG12.c.360.6	Male	-884.661276961454	-884.535412119596	12	360	6	365	12136	832220406	25698370	27973978	12141	832510138	25988102	28263710	289732	0.251729683716576	0.615859778786394	25843236	832365272	28118844	cela1_red_10_27973978	cela1_red_10_28263710
LG12.c.360.6	Female	-1896.56563374966	-1896.56563528471	12	360	6	365	12136	832220406	25698370	27973978	12141	832510138	25988102	28263710	289732	-3.07011578115635e-06	1	25843236	832365272	28118844	cela1_red_10_27973978	cela1_red_10_28263710
LG12.c.361.6	Both	-2818.07446259568	-2814.62680230887	12	361	6	366	12137	832255285	25733249	28008857	12142	832696782	26174746	28450354	441497	6.89532057362794	0.00864216640596138	25953997.5	832476033.5	28229605.5	cela1_red_10_28008857	cela1_red_10_28450354
LG12.c.361.6	Male	-884.663132400453	-883.167376221814	12	361	6	366	12137	832255285	25733249	28008857	12142	832696782	26174746	28450354	441497	2.991512357278	0.08370196260116	25953997.5	832476033.5	28229605.5	cela1_red_10_28008857	cela1_red_10_28450354
LG12.c.361.6	Female	-1896.57137001113	-1895.65027817122	12	361	6	366	12137	832255285	25733249	28008857	12142	832696782	26174746	28450354	441497	1.84218367982157	0.174695222151729	25953997.5	832476033.5	28229605.5	cela1_red_10_28008857	cela1_red_10_28450354
LG12.c.362.6	Both	-2818.07872183474	-2814.03015666498	12	362	6	367	12138	832345265	25823229	28098837	12143	832754748	26232712	28508320	409483	8.09713033951994	0.00443353969232119	26027970.5	832550006.5	28303578.5	cela1_red_10_28098837	cela1_red_10_28508320
LG12.c.362.6	Male	-884.665531783306	-881.013462078269	12	362	6	367	12138	832345265	25823229	28098837	12143	832754748	26232712	28508320	409483	7.30413941007396	0.006879593825314	26027970.5	832550006.5	28303578.5	cela1_red_10_28098837	cela1_red_10_28508320
LG12.c.362.6	Female	-1896.57209740746	-1895.70256162334	12	362	6	367	12138	832345265	25823229	28098837	12143	832754748	26232712	28508320	409483	1.73907156824134	0.187256508184693	26027970.5	832550006.5	28303578.5	cela1_red_10_28098837	cela1_red_10_28508320
LG12.c.363.6	Both	-2818.07878370516	-2813.94692396009	12	363	6	368	12139	832426099	25904063	28179671	12144	832795099	26273063	28548671	369000	8.26371949012901	0.00404451783007387	26088563	832610599	28364171	cela1_red_10_28179671	cela1_red_10_28548671
LG12.c.363.6	Male	-884.665660101688	-881.176018042785	12	363	6	368	12139	832426099	25904063	28179671	12144	832795099	26273063	28548671	369000	6.9792841178064	0.00824585869013961	26088563	832610599	28364171	cela1_red_10_28179671	cela1_red_10_28548671
LG12.c.363.6	Female	-1896.57257581868	-1895.46249391557	12	363	6	368	12139	832426099	25904063	28179671	12144	832795099	26273063	28548671	369000	2.22016380622517	0.136218606195089	26088563	832610599	28364171	cela1_red_10_28179671	cela1_red_10_28548671
LG12.c.364.6	Both	-2818.07923678633	-2813.9263130596	12	364	6	369	12140	832510063	25988027	28263635	12145	832939448	26417412	28693020	429385	8.30584745346641	0.00395176388430407	26202719.5	832724755.5	28478327.5	cela1_red_10_28263635	cela1_red_10_28693020
LG12.c.364.6	Male	-884.665651595382	-881.083237988279	12	364	6	369	12140	832510063	25988027	28263635	12145	832939448	26417412	28693020	429385	7.16482721420539	0.00743468516647527	26202719.5	832724755.5	28478327.5	cela1_red_10_28263635	cela1_red_10_28693020
LG12.c.364.6	Female	-1896.57269026326	-1895.55858461917	12	364	6	369	12140	832510063	25988027	28263635	12145	832939448	26417412	28693020	429385	2.02821128817959	0.154402235603372	26202719.5	832724755.5	28478327.5	cela1_red_10_28263635	cela1_red_10_28693020
LG12.c.365.6	Both	-2818.07587083427	-2813.89603108827	12	365	6	370	12141	832510138	25988102	28263710	12146	833081398	26559362	28834970	571260	8.35967949199767	0.00383638227560912	26273732	832795768	28549340	cela1_red_10_28263710	cela1_red_10_28834970
LG12.c.365.6	Male	-884.664842123601	-881.18483774186	12	365	6	370	12141	832510138	25988102	28263710	12146	833081398	26559362	28834970	571260	6.96000876348307	0.00833516246853694	26273732	832795768	28549340	cela1_red_10_28263710	cela1_red_10_28834970
LG12.c.365.6	Female	-1896.57148051116	-1895.57330653415	12	365	6	370	12141	832510138	25988102	28263710	12146	833081398	26559362	28834970	571260	1.99634795402244	0.15767872459086	26273732	832795768	28549340	cela1_red_10_28263710	cela1_red_10_28834970
LG12.c.366.6	Both	-2818.07511847403	-2813.72810198376	12	366	6	371	12142	832696782	26174746	28450354	12147	833177823	26655787	28931395	481041	8.69403298053749	0.00319253446990753	26415266.5	832937302.5	28690874.5	cela1_red_10_28450354	cela1_red_10_28931395
LG12.c.366.6	Male	-884.666149400894	-880.475812386503	12	366	6	371	12142	832696782	26174746	28450354	12147	833177823	26655787	28931395	481041	8.38067402878301	0.00379231757597442	26415266.5	832937302.5	28690874.5	cela1_red_10_28450354	cela1_red_10_28931395
LG12.c.366.6	Female	-1896.57077601	-1895.51731610222	12	366	6	371	12142	832696782	26174746	28450354	12147	833177823	26655787	28931395	481041	2.10691981555829	0.14663420618572	26415266.5	832937302.5	28690874.5	cela1_red_10_28450354	cela1_red_10_28931395
LG12.c.367.6	Both	-2818.06805907678	-2816.1307573606	12	367	6	372	12143	832754748	26232712	28508320	12148	833247707	26725671	29001279	492959	3.87460343235034	0.049021889614322	26479191.5	833001227.5	28754799.5	cela1_red_10_28508320	cela1_red_10_29001279
LG12.c.367.6	Male	-884.665486673095	-881.95472761796	12	367	6	372	12143	832754748	26232712	28508320	12148	833247707	26725671	29001279	492959	5.42151811026838	0.0198900585764816	26479191.5	833001227.5	28754799.5	cela1_red_10_28508320	cela1_red_10_29001279
LG12.c.367.6	Female	-1896.5705035655	-1895.79896466795	12	367	6	372	12143	832754748	26232712	28508320	12148	833247707	26725671	29001279	492959	1.54307779511873	0.214160262321237	26479191.5	833001227.5	28754799.5	cela1_red_10_28508320	cela1_red_10_29001279
LG12.c.368.6	Both	-2818.06357761651	-2816.9899147821	12	368	6	373	12144	832795099	26273063	28548671	12149	833333493	26811457	29087065	538394	2.14732566881776	0.142818468900651	26542260	833064296	28817868	cela1_red_10_28548671	cela1_red_10_29087065
LG12.c.368.6	Male	-884.664022495615	-883.254229365945	12	368	6	373	12144	832795099	26273063	28548671	12149	833333493	26811457	29087065	538394	2.81958625934112	0.0931204038441573	26542260	833064296	28817868	cela1_red_10_28548671	cela1_red_10_29087065
LG12.c.368.6	Female	-1896.56972034417	-1896.00967765811	12	368	6	373	12144	832795099	26273063	28548671	12149	833333493	26811457	29087065	538394	1.12008537211159	0.289900071863786	26542260	833064296	28817868	cela1_red_10_28548671	cela1_red_10_29087065
LG12.c.369.6	Both	-2818.0690035113	-2816.30040046266	12	369	6	374	12145	832939448	26417412	28693020	12150	833402530	26880494	29156102	463082	3.53720609728407	0.060006457980086	26648953	833170989	28924561	cela1_red_10_28693020	cela1_red_10_29156102
LG12.c.369.6	Male	-884.664151034338	-883.345717954209	12	369	6	374	12145	832939448	26417412	28693020	12150	833402530	26880494	29156102	463082	2.63686616025893	0.104409315519236	26648953	833170989	28924561	cela1_red_10_28693020	cela1_red_10_29156102
LG12.c.369.6	Female	-1896.57193839061	-1895.34495452333	12	369	6	374	12145	832939448	26417412	28693020	12150	833402530	26880494	29156102	463082	2.45396773455832	0.117228212528084	26648953	833170989	28924561	cela1_red_10_28693020	cela1_red_10_29156102
LG12.c.370.6	Both	-2818.07300224286	-2815.99276922601	12	370	6	375	12146	833081398	26559362	28834970	12151	833488128	26966092	29241700	406730	4.16046603368795	0.0413780176355496	26762727	833284763	29038335	cela1_red_10_28834970	cela1_red_10_29241700
LG12.c.370.6	Male	-884.666022915519	-882.77539517658	12	370	6	375	12146	833081398	26559362	28834970	12151	833488128	26966092	29241700	406730	3.78125547787931	0.0518297575436074	26762727	833284763	29038335	cela1_red_10_28834970	cela1_red_10_29241700
LG12.c.370.6	Female	-1896.57260719204	-1895.10257081336	12	370	6	375	12146	833081398	26559362	28834970	12151	833488128	26966092	29241700	406730	2.94007275734657	0.086406840821829	26762727	833284763	29038335	cela1_red_10_28834970	cela1_red_10_29241700
LG12.c.372.6	Both	-2818.0766608583	-2815.21222841248	12	372	6	377	12148	833247707	26725671	29001279	12153	833630856	27108820	29384428	383149	5.72886489164921	0.016688266159718	26917245.5	833439281.5	29192853.5	cela1_red_10_29001279	cela1_red_10_29384428
LG12.c.372.6	Male	-884.665098443437	-882.616609935152	12	372	6	377	12148	833247707	26725671	29001279	12153	833630856	27108820	29384428	383149	4.09697701656978	0.042959960025665	26917245.5	833439281.5	29192853.5	cela1_red_10_29001279	cela1_red_10_29384428
LG12.c.372.6	Female	-1896.57322402778	-1895.29228945369	12	372	6	377	12148	833247707	26725671	29001279	12153	833630856	27108820	29384428	383149	2.56186914818682	0.109469087887362	26917245.5	833439281.5	29192853.5	cela1_red_10_29001279	cela1_red_10_29384428
LG12.c.373.6	Both	-2818.07423488399	-2816.40145459512	12	373	6	378	12149	833333493	26811457	29087065	12154	833822955	27300919	29576527	489462	3.34556057774262	0.0673865219119956	27056188	833578224	29331796	cela1_red_10_29087065	cela1_red_10_29576527
LG12.c.373.6	Male	-884.665407907725	-882.123229704271	12	373	6	378	12149	833333493	26811457	29087065	12154	833822955	27300919	29576527	489462	5.08435640690846	0.0241426358553501	27056188	833578224	29331796	cela1_red_10_29087065	cela1_red_10_29576527
LG12.c.373.6	Female	-1896.56947618309	-1896.38248482246	12	373	6	378	12149	833333493	26811457	29087065	12154	833822955	27300919	29576527	489462	0.373982721273023	0.540841307239952	27056188	833578224	29331796	cela1_red_10_29087065	cela1_red_10_29576527
LG12.c.374.6	Both	-2818.07235989956	-2816.27140216431	12	374	6	379	12150	833402530	26880494	29156102	12155	833860763	27338727	29614335	458233	3.60191547049453	0.0577130379080998	27109610.5	833631646.5	29385218.5	cela1_red_10_29156102	cela1_red_10_29614335
LG12.c.374.6	Male	-884.664374935754	-882.372862873817	12	374	6	379	12150	833402530	26880494	29156102	12155	833860763	27338727	29614335	458233	4.58302412387252	0.0322901797007901	27109610.5	833631646.5	29385218.5	cela1_red_10_29156102	cela1_red_10_29614335
LG12.c.374.6	Female	-1896.56959026716	-1896.3113203918	12	374	6	379	12150	833402530	26880494	29156102	12155	833860763	27338727	29614335	458233	0.516539750714401	0.472321469867756	27109610.5	833631646.5	29385218.5	cela1_red_10_29156102	cela1_red_10_29614335
LG12.c.375.6	Both	-2818.0741495471	-2815.83461786748	12	375	6	380	12151	833488128	26966092	29241700	12156	833927484	27405448	29681056	439356	4.47906335925472	0.0343125206476818	27185770	833707806	29461378	cela1_red_10_29241700	cela1_red_10_29681056
LG12.c.375.6	Male	-884.666009658208	-881.768171981567	12	375	6	380	12151	833488128	26966092	29241700	12156	833927484	27405448	29681056	439356	5.79567535328283	0.0160656423864111	27185770	833707806	29461378	cela1_red_10_29241700	cela1_red_10_29681056
LG12.c.375.6	Female	-1896.5685226827	-1896.42201177043	12	375	6	380	12151	833488128	26966092	29241700	12156	833927484	27405448	29681056	439356	0.293021824542393	0.588290549892809	27185770	833707806	29461378	cela1_red_10_29241700	cela1_red_10_29681056
LG12.c.376.6	Both	-2818.07354794257	-2815.54390372637	12	376	6	381	12152	833547929	27025893	29301501	12157	834014988	27492952	29768560	467059	5.05928843240599	0.0244942929153756	27259422.5	833781458.5	29535030.5	cela1_red_10_29301501	cela1_red_10_29768560
LG12.c.376.6	Male	-884.665335628395	-881.906044401098	12	376	6	381	12152	833547929	27025893	29301501	12157	834014988	27492952	29768560	467059	5.51858245459493	0.0188154995341109	27259422.5	833781458.5	29535030.5	cela1_red_10_29301501	cela1_red_10_29768560
LG12.c.376.6	Female	-1896.56910725836	-1896.28334307965	12	376	6	381	12152	833547929	27025893	29301501	12157	834014988	27492952	29768560	467059	0.571528357409534	0.449652226270421	27259422.5	833781458.5	29535030.5	cela1_red_10_29301501	cela1_red_10_29768560
LG12.c.377.6	Both	-2818.07367104277	-2815.67569277337	12	377	6	382	12153	833630856	27108820	29384428	12158	834073348	27551312	29826920	442492	4.79595653880824	0.0285266123448149	27330066	833852102	29605674	cela1_red_10_29384428	cela1_red_10_29826920
LG12.c.377.6	Male	-884.665327652637	-881.67218205443	12	377	6	382	12153	833630856	27108820	29384428	12158	834073348	27551312	29826920	442492	5.98629119641419	0.0144174846502889	27330066	833852102	29605674	cela1_red_10_29384428	cela1_red_10_29826920
LG12.c.377.6	Female	-1896.56920926929	-1896.31680473614	12	377	6	382	12153	833630856	27108820	29384428	12158	834073348	27551312	29826920	442492	0.504809066299003	0.477394647318212	27330066	833852102	29605674	cela1_red_10_29384428	cela1_red_10_29826920
LG12.c.378.6	Both	-2818.08137233277	-2814.82380536549	12	378	6	383	12154	833822955	27300919	29576527	12159	834108532	27586496	29862104	285577	6.51513393455934	0.010696026603713	27443707.5	833965743.5	29719315.5	cela1_red_10_29576527	cela1_red_10_29862104
LG12.c.378.6	Male	-884.666267464198	-881.557654407811	12	378	6	383	12154	833822955	27300919	29576527	12159	834108532	27586496	29862104	285577	6.21722611277505	0.0126513173144263	27443707.5	833965743.5	29719315.5	cela1_red_10_29576527	cela1_red_10_29862104
LG12.c.378.6	Female	-1896.57387882015	-1895.49175387198	12	378	6	383	12154	833822955	27300919	29576527	12159	834108532	27586496	29862104	285577	2.16424989632651	0.141253535417406	27443707.5	833965743.5	29719315.5	cela1_red_10_29576527	cela1_red_10_29862104
LG12.c.379.6	Both	-2818.07306760831	-2815.96798216422	12	379	6	384	12155	833860763	27338727	29614335	12160	834179543	27657507	29933115	318780	4.21017088817825	0.0401822888254046	27498117	834020153	29773725	cela1_red_10_29614335	cela1_red_10_29933115
LG12.c.379.6	Male	-884.665231913064	-880.298549766056	12	379	6	384	12155	833860763	27338727	29614335	12160	834179543	27657507	29933115	318780	8.73336429401525	0.00312439472374837	27498117	834020153	29773725	cela1_red_10_29614335	cela1_red_10_29933115
LG12.c.379.6	Female	-1896.57196840092	-1895.90152142417	12	379	6	384	12155	833860763	27338727	29614335	12160	834179543	27657507	29933115	318780	1.34089395349974	0.246876379239761	27498117	834020153	29773725	cela1_red_10_29614335	cela1_red_10_29933115
LG12.c.380.6	Both	-2818.07300577248	-2816.19827668783	12	380	6	385	12156	833927484	27405448	29681056	12161	834198236	27676200	29951808	270752	3.7494581693054	0.0528246324663468	27540824	834062860	29816432	cela1_red_10_29681056	cela1_red_10_29951808
LG12.c.380.6	Male	-884.665013025921	-880.478484844537	12	380	6	385	12156	833927484	27405448	29681056	12161	834198236	27676200	29951808	270752	8.3730563627671	0.00380824620514253	27540824	834062860	29816432	cela1_red_10_29681056	cela1_red_10_29951808
LG12.c.380.6	Female	-1896.57162096707	-1896.08219682395	12	380	6	385	12156	833927484	27405448	29681056	12161	834198236	27676200	29951808	270752	0.978848286247285	0.322483311227662	27540824	834062860	29816432	cela1_red_10_29681056	cela1_red_10_29951808
LG12.c.381.6	Both	-2818.06667008452	-2815.79766503562	12	381	6	386	12157	834014988	27492952	29768560	12162	834230597	27708561	29984169	215609	4.53801009779818	0.0331501068887575	27600756.5	834122792.5	29876364.5	cela1_red_10_29768560	cela1_red_10_29984169
LG12.c.381.6	Male	-884.663124285451	-882.044149751089	12	381	6	386	12157	834014988	27492952	29768560	12162	834230597	27708561	29984169	215609	5.23794906872354	0.0220993120653923	27600756.5	834122792.5	29876364.5	cela1_red_10_29768560	cela1_red_10_29984169
LG12.c.381.6	Female	-1896.57030411842	-1895.96161128289	12	381	6	386	12157	834014988	27492952	29768560	12162	834230597	27708561	29984169	215609	1.2173856710524	0.269874325947527	27600756.5	834122792.5	29876364.5	cela1_red_10_29768560	cela1_red_10_29984169
LG12.c.382.6	Both	-2818.06604141222	-2814.95119430576	12	382	6	387	12158	834073348	27551312	29826920	12163	834310279	27788243	30063851	236931	6.22969421292782	0.0125625428274445	27669777.5	834191813.5	29945385.5	cela1_red_10_29826920	cela1_red_10_30063851
LG12.c.382.6	Male	-884.663482967891	-881.022866309308	12	382	6	387	12158	834073348	27551312	29826920	12163	834310279	27788243	30063851	236931	7.28123331716574	0.0069678680173294	27669777.5	834191813.5	29945385.5	cela1_red_10_29826920	cela1_red_10_30063851
LG12.c.382.6	Female	-1896.56918681458	-1895.87053689164	12	382	6	387	12158	834073348	27551312	29826920	12163	834310279	27788243	30063851	236931	1.39729984588757	0.237176188057356	27669777.5	834191813.5	29945385.5	cela1_red_10_29826920	cela1_red_10_30063851
LG12.c.383.6	Both	-2818.06621686658	-2815.10543258162	12	383	6	388	12159	834108532	27586496	29862104	12164	834338095	27816059	30091667	229563	5.92156856990096	0.0149566373871002	27701277.5	834223313.5	29976885.5	cela1_red_10_29862104	cela1_red_10_30091667
LG12.c.383.6	Male	-884.663345118216	-882.81797346992	12	383	6	388	12159	834108532	27586496	29862104	12164	834338095	27816059	30091667	229563	3.69074329659156	0.0547152278394369	27701277.5	834223313.5	29976885.5	cela1_red_10_29862104	cela1_red_10_30091667
LG12.c.383.6	Female	-1896.56995434297	-1895.57400059572	12	383	6	388	12159	834108532	27586496	29862104	12164	834338095	27816059	30091667	229563	1.99190749451873	0.158141576869705	27701277.5	834223313.5	29976885.5	cela1_red_10_29862104	cela1_red_10_30091667
LG12.c.384.6	Both	-2818.05907967379	-2817.47694314505	12	384	6	389	12160	834179543	27657507	29933115	12165	834378322	27856286	30131894	198779	1.16427305748584	0.280581105489786	27756896.5	834278932.5	30032504.5	cela1_red_10_29933115	cela1_red_10_30131894
LG12.c.384.6	Male	-884.663795543803	-883.151359399944	12	384	6	389	12160	834179543	27657507	29933115	12165	834378322	27856286	30131894	198779	3.02487228771952	0.0819967764735846	27756896.5	834278932.5	30032504.5	cela1_red_10_29933115	cela1_red_10_30131894
LG12.c.384.6	Female	-1896.56563211342	-1896.56563475182	12	384	6	389	12160	834179543	27657507	29933115	12165	834378322	27856286	30131894	198779	-5.2767959459743e-06	1	27756896.5	834278932.5	30032504.5	cela1_red_10_29933115	cela1_red_10_30131894
LG12.c.385.6	Both	-2818.06097026553	-2817.32227318372	12	385	6	390	12161	834198236	27676200	29951808	12166	834437182	27915146	30190754	238946	1.47739416361674	0.224182675049855	27795673	834317709	30071281	cela1_red_10_29951808	cela1_red_10_30190754
LG12.c.385.6	Male	-884.664564345176	-882.570395550371	12	385	6	390	12161	834198236	27676200	29951808	12166	834437182	27915146	30190754	238946	4.18833758961068	0.0407029922252893	27795673	834317709	30071281	cela1_red_10_29951808	cela1_red_10_30190754
LG12.c.385.6	Female	-1896.56569215853	-1896.56569401199	12	385	6	390	12161	834198236	27676200	29951808	12166	834437182	27915146	30190754	238946	-3.70692259821226e-06	1	27795673	834317709	30071281	cela1_red_10_29951808	cela1_red_10_30190754
LG12.c.386.6	Both	-2818.06452844654	-2816.75757516988	12	386	6	391	12162	834230597	27708561	29984169	12167	834600139	28078103	30353711	369542	2.61390655332434	0.105930520497854	27893332	834415368	30168940	cela1_red_10_29984169	cela1_red_10_30353711
LG12.c.386.6	Male	-884.666421147215	-881.45612763721	12	386	6	391	12162	834230597	27708561	29984169	12167	834600139	28078103	30353711	369542	6.42058702001032	0.0112804867347602	27893332	834415368	30168940	cela1_red_10_29984169	cela1_red_10_30353711
LG12.c.386.6	Female	-1896.56611041792	-1896.56611582607	12	386	6	391	12162	834230597	27708561	29984169	12167	834600139	28078103	30353711	369542	-1.08163144432183e-05	1	27893332	834415368	30168940	cela1_red_10_29984169	cela1_red_10_30353711
LG12.c.387.6	Both	-2818.06562346178	-2817.16613608482	12	387	6	392	12163	834310279	27788243	30063851	12168	834666628	28144592	30420200	356349	1.79897475391499	0.179836491565118	27966417.5	834488453.5	30242025.5	cela1_red_10_30063851	cela1_red_10_30420200
LG12.c.387.6	Male	-884.666523899337	-881.464615189582	12	387	6	392	12163	834310279	27788243	30063851	12168	834666628	28144592	30420200	356349	6.40381741950864	0.0113875249647274	27966417.5	834488453.5	30242025.5	cela1_red_10_30063851	cela1_red_10_30420200
LG12.c.387.6	Female	-1896.56718349846	-1896.55095444563	12	387	6	392	12163	834310279	27788243	30063851	12168	834666628	28144592	30420200	356349	0.0324581056497664	0.857025914037598	27966417.5	834488453.5	30242025.5	cela1_red_10_30063851	cela1_red_10_30420200
LG12.c.388.6	Both	-2818.06472749081	-2817.23935062923	12	388	6	393	12164	834338095	27816059	30091667	12169	834857318	28335282	30610890	519223	1.65075372315732	0.19885637638782	28075670.5	834597706.5	30351278.5	cela1_red_10_30091667	cela1_red_10_30610890
LG12.c.388.6	Male	-884.665107510377	-881.628996638342	12	388	6	393	12164	834338095	27816059	30091667	12169	834857318	28335282	30610890	519223	6.07222174407048	0.0137324120459019	28075670.5	834597706.5	30351278.5	cela1_red_10_30091667	cela1_red_10_30610890
LG12.c.388.6	Female	-1896.56823172982	-1896.47164498836	12	388	6	393	12164	834338095	27816059	30091667	12169	834857318	28335282	30610890	519223	0.193173482914517	0.660288376324843	28075670.5	834597706.5	30351278.5	cela1_red_10_30091667	cela1_red_10_30610890
LG12.c.389.6	Both	-2818.06495895801	-2817.6113981126	12	389	6	394	12165	834378322	27856286	30131894	12170	834907981	28385945	30661553	529659	0.907121690812346	0.340879274011464	28121115.5	834643151.5	30396723.5	cela1_red_10_30131894	cela1_red_10_30661553
LG12.c.389.6	Male	-884.665217873251	-881.411350078582	12	389	6	394	12165	834378322	27856286	30131894	12170	834907981	28385945	30661553	529659	6.50773558933793	0.0107406195902521	28121115.5	834643151.5	30396723.5	cela1_red_10_30131894	cela1_red_10_30661553
LG12.c.389.6	Female	-1896.56855459575	-1896.50829326298	12	389	6	394	12165	834378322	27856286	30131894	12170	834907981	28385945	30661553	529659	0.120522665532917	0.728468306594318	28121115.5	834643151.5	30396723.5	cela1_red_10_30131894	cela1_red_10_30661553
LG12.c.390.6	Both	-2818.06727170348	-2817.52974728469	12	390	6	395	12166	834437182	27915146	30190754	12171	834981606	28459570	30735178	544424	1.07504883759066	0.29980781122194	28187358	834709394	30462966	cela1_red_10_30190754	cela1_red_10_30735178
LG12.c.390.6	Male	-884.664264725737	-882.347794771637	12	390	6	395	12166	834437182	27915146	30190754	12171	834981606	28459570	30735178	544424	4.63293990819989	0.0313637771270536	28187358	834709394	30462966	cela1_red_10_30190754	cela1_red_10_30735178
LG12.c.390.6	Female	-1896.5693904465	-1896.46935754375	12	390	6	395	12166	834437182	27915146	30190754	12171	834981606	28459570	30735178	544424	0.200065805514441	0.654667734949363	28187358	834709394	30462966	cela1_red_10_30190754	cela1_red_10_30735178
LG12.c.391.6	Both	-2818.06547176512	-2817.65523824931	12	391	6	396	12167	834600139	28078103	30353711	12172	835164277	28642241	30917849	564138	0.820467031632688	0.365043652153302	28360172	834882208	30635780	cela1_red_10_30353711	cela1_red_10_30917849
LG12.c.391.6	Male	-884.663050566699	-883.482256526569	12	391	6	396	12167	834600139	28078103	30353711	12172	835164277	28642241	30917849	564138	2.36158808025993	0.124355536732206	28360172	834882208	30635780	cela1_red_10_30353711	cela1_red_10_30917849
LG12.c.391.6	Female	-1896.56936857185	-1896.46876270127	12	391	6	396	12167	834600139	28078103	30353711	12172	835164277	28642241	30917849	564138	0.201211741161842	0.653744536183637	28360172	834882208	30635780	cela1_red_10_30353711	cela1_red_10_30917849
LG12.c.392.6	Both	-2818.07308818789	-2816.6383896457	12	392	6	397	12168	834666628	28144592	30420200	12173	835218332	28696296	30971904	551704	2.86939708438422	0.0902786842129066	28420444	834942480	30696052	cela1_red_10_30420200	cela1_red_10_30971904
LG12.c.392.6	Male	-884.662264180843	-884.365887150419	12	392	6	397	12168	834666628	28144592	30420200	12173	835218332	28696296	30971904	551704	0.592754060849529	0.441356112204636	28420444	834942480	30696052	cela1_red_10_30420200	cela1_red_10_30971904
LG12.c.392.6	Female	-1896.57233625563	-1896.19312115199	12	392	6	397	12168	834666628	28144592	30420200	12173	835218332	28696296	30971904	551704	0.758430207290985	0.383820232134863	28420444	834942480	30696052	cela1_red_10_30420200	cela1_red_10_30971904
LG12.c.393.6	Both	-2818.072073774	-2816.68798533806	12	393	6	398	12169	834857318	28335282	30610890	12174	835249446	28727410	31003018	392128	2.7681768718885	0.0961556221727956	28531346	835053382	30806954	cela1_red_10_30610890	cela1_red_10_31003018
LG12.c.393.6	Male	-884.663689706314	-882.97612779619	12	393	6	398	12169	834857318	28335282	30610890	12174	835249446	28727410	31003018	392128	3.3751238202492	0.0661876060691505	28531346	835053382	30806954	cela1_red_10_30610890	cela1_red_10_31003018
LG12.c.393.6	Female	-1896.57076239276	-1896.3149697733	12	393	6	398	12169	834857318	28335282	30610890	12174	835249446	28727410	31003018	392128	0.511585238918542	0.474453422366559	28531346	835053382	30806954	cela1_red_10_30610890	cela1_red_10_31003018
LG12.c.394.6	Both	-2818.07003872028	-2816.7533542607	12	394	6	399	12170	834907981	28385945	30661553	12175	835293948	28771912	31047520	385967	2.63336891914787	0.104639474148741	28578928.5	835100964.5	30854536.5	cela1_red_10_30661553	cela1_red_10_31047520
LG12.c.394.6	Male	-884.663573508434	-883.098462476052	12	394	6	399	12170	834907981	28385945	30661553	12175	835293948	28771912	31047520	385967	3.13022206476489	0.0768532711685053	28578928.5	835100964.5	30854536.5	cela1_red_10_30661553	cela1_red_10_31047520
LG12.c.394.6	Female	-1896.56941824105	-1896.39923402684	12	394	6	399	12170	834907981	28385945	30661553	12175	835293948	28771912	31047520	385967	0.340368428423972	0.559616635225941	28578928.5	835100964.5	30854536.5	cela1_red_10_30661553	cela1_red_10_31047520
LG12.c.395.6	Both	-2818.06769436195	-2816.70108074865	12	395	6	400	12171	834981606	28459570	30735178	12176	835377835	28855799	31131407	396229	2.73322722659213	0.0982805072019487	28657684.5	835179720.5	30933292.5	cela1_red_10_30735178	cela1_red_10_31131407
LG12.c.395.6	Male	-884.66368516045	-883.052478285562	12	395	6	400	12171	834981606	28459570	30735178	12176	835377835	28855799	31131407	396229	3.22241374977443	0.0726364492405792	28657684.5	835179720.5	30933292.5	cela1_red_10_30735178	cela1_red_10_31131407
LG12.c.395.6	Female	-1896.56771170499	-1896.52025010153	12	395	6	400	12171	834981606	28459570	30735178	12176	835377835	28855799	31131407	396229	0.0949232069297068	0.758009208621832	28657684.5	835179720.5	30933292.5	cela1_red_10_30735178	cela1_red_10_31131407
LG12.c.396.6	Both	-2818.0632626624	-2816.69354649873	12	396	6	401	12172	835164277	28642241	30917849	12177	835418864	28896828	31172436	254587	2.73943232733836	0.0978995391172081	28769534.5	835291570.5	31045142.5	cela1_red_10_30917849	cela1_red_10_31172436
LG12.c.396.6	Male	-884.66323218679	-883.187018437426	12	396	6	401	12172	835164277	28642241	30917849	12177	835418864	28896828	31172436	254587	2.95242749872841	0.0857486675694232	28769534.5	835291570.5	31045142.5	cela1_red_10_30917849	cela1_red_10_31172436
LG12.c.396.6	Female	-1896.56709535683	-1896.5231080962	12	396	6	401	12172	835164277	28642241	30917849	12177	835418864	28896828	31172436	254587	0.0879745212500893	0.766768099270098	28769534.5	835291570.5	31045142.5	cela1_red_10_30917849	cela1_red_10_31172436
LG12.c.397.6	Both	-2818.06511845383	-2816.51003992813	12	397	6	402	12173	835218332	28696296	30971904	12178	835469777	28947741	31223349	251445	3.11015705140653	0.0778054576814935	28822018.5	835344054.5	31097626.5	cela1_red_10_30971904	cela1_red_10_31223349
LG12.c.397.6	Male	-884.663712872405	-883.073089635315	12	397	6	402	12173	835218332	28696296	30971904	12178	835469777	28947741	31223349	251445	3.18124647417926	0.0744878872482733	28822018.5	835344054.5	31097626.5	cela1_red_10_30971904	cela1_red_10_31223349
LG12.c.397.6	Female	-1896.56755434083	-1896.46341362963	12	397	6	402	12173	835218332	28696296	30971904	12178	835469777	28947741	31223349	251445	0.208281422398613	0.64811775494813	28822018.5	835344054.5	31097626.5	cela1_red_10_30971904	cela1_red_10_31223349
LG12.c.398.6	Both	-2818.05388351775	-2818.05388765547	12	398	6	403	12174	835249446	28727410	31003018	12179	835549102	29027066	31302674	299656	-8.27543226478156e-06	1	28877238	835399274	31152846	cela1_red_10_31003018	cela1_red_10_31302674
LG12.c.398.6	Male	-884.662530043415	-884.209030659486	12	398	6	403	12174	835249446	28727410	31003018	12179	835549102	29027066	31302674	299656	0.906998767859022	0.340911989948477	28877238	835399274	31152846	cela1_red_10_31003018	cela1_red_10_31302674
LG12.c.398.6	Female	-1896.5641461844	-1896.56415093756	12	398	6	403	12174	835249446	28727410	31003018	12179	835549102	29027066	31302674	299656	-9.50632738749846e-06	1	28877238	835399274	31152846	cela1_red_10_31003018	cela1_red_10_31302674
LG12.c.399.6	Both	-2818.05479107191	-2818.05479290759	12	399	6	404	12175	835293948	28771912	31047520	12180	835608514	29086478	31362086	314566	-3.67136362910969e-06	1	28929195	835451231	31204803	cela1_red_10_31047520	cela1_red_10_31362086
LG12.c.399.6	Male	-884.661229470535	-884.661229845021	12	399	6	404	12175	835293948	28771912	31047520	12180	835608514	29086478	31362086	314566	-7.48970933273085e-07	1	28929195	835451231	31204803	cela1_red_10_31047520	cela1_red_10_31362086
LG12.c.399.6	Female	-1896.56483121898	-1896.56483528087	12	399	6	404	12175	835293948	28771912	31047520	12180	835608514	29086478	31362086	314566	-8.12377538750297e-06	1	28929195	835451231	31204803	cela1_red_10_31047520	cela1_red_10_31362086
LG12.c.400.6	Both	-2818.0547938041	-2818.05479577985	12	400	6	405	12176	835377835	28855799	31131407	12181	835639232	29117196	31392804	261397	-3.95148708776105e-06	1	28986497.5	835508533.5	31262105.5	cela1_red_10_31131407	cela1_red_10_31392804
LG12.c.400.6	Male	-884.66165174201	-884.587029456898	12	400	6	405	12176	835377835	28855799	31131407	12181	835639232	29117196	31392804	261397	0.149244570225392	0.699258321748821	28986497.5	835508533.5	31262105.5	cela1_red_10_31131407	cela1_red_10_31392804
LG12.c.400.6	Female	-1896.56462400708	-1896.56462840141	12	400	6	405	12176	835377835	28855799	31131407	12181	835639232	29117196	31392804	261397	-8.78866330822348e-06	1	28986497.5	835508533.5	31262105.5	cela1_red_10_31131407	cela1_red_10_31392804
LG12.c.401.6	Both	-2818.05775414659	-2818.01823279031	12	401	6	406	12177	835418864	28896828	31172436	12182	835806465	29284429	31560037	387601	0.0790427125602946	0.778598912578228	29090628.5	835612664.5	31366236.5	cela1_red_10_31172436	cela1_red_10_31560037
LG12.c.401.6	Male	-884.662574246651	-884.118125462822	12	401	6	406	12177	835418864	28896828	31172436	12182	835806465	29284429	31560037	387601	1.08889756765848	0.296715601345633	29090628.5	835612664.5	31366236.5	cela1_red_10_31172436	cela1_red_10_31560037
LG12.c.401.6	Female	-1896.56496156842	-1896.56496559698	12	401	6	406	12177	835418864	28896828	31172436	12182	835806465	29284429	31560037	387601	-8.05713716545142e-06	1	29090628.5	835612664.5	31366236.5	cela1_red_10_31172436	cela1_red_10_31560037
LG12.c.241.10	Both	-2818.06441351415	-2816.10853202115	12	241	10	250	12017	823245831	16723795	16424253	12026	823800695	17278659	16979117	554864	3.91176298601204	0.0479492722244613	17001227	823523263	16701685	cela1_red_10_16424253	cela1_red_10_16979117
LG12.c.241.10	Male	-884.662332550492	-884.468076558772	12	241	10	250	12017	823245831	16723795	16424253	12026	823800695	17278659	16979117	554864	0.388511983441276	0.533082605157422	17001227	823523263	16701685	cela1_red_10_16424253	cela1_red_10_16979117
LG12.c.241.10	Female	-1896.57363938522	-1894.51127248969	12	241	10	250	12017	823245831	16723795	16424253	12026	823800695	17278659	16979117	554864	4.12473379106041	0.0422606691635096	17001227	823523263	16701685	cela1_red_10_16424253	cela1_red_10_16979117
LG12.c.242.10	Both	-2818.06467725033	-2815.96037453951	12	242	10	251	12018	823314234	16792198	16492656	12027	823992526	17470490	17170948	678292	4.20860542165792	0.0402193899741659	17131344	823653380	16831802	cela1_red_10_16492656	cela1_red_10_17170948
LG12.c.242.10	Male	-884.662590837355	-884.384455022984	12	242	10	251	12018	823314234	16792198	16492656	12027	823992526	17470490	17170948	678292	0.556271628743161	0.455766372754014	17131344	823653380	16831802	cela1_red_10_16492656	cela1_red_10_17170948
LG12.c.242.10	Female	-1896.57360808576	-1894.43789231932	12	242	10	251	12018	823314234	16792198	16492656	12027	823992526	17470490	17170948	678292	4.27143153288489	0.0387582651648112	17131344	823653380	16831802	cela1_red_10_16492656	cela1_red_10_17170948
LG12.c.243.10	Both	-2818.06160814984	-2816.58849141734	12	243	10	252	12019	823383174	16861138	16561596	12028	824141220	17619184	17319642	758046	2.94623346499611	0.0860779611668411	17240161	823762197	16940619	cela1_red_10_16561596	cela1_red_10_17319642
LG12.c.243.10	Male	-884.663416298996	-884.216624180096	12	243	10	252	12019	823383174	16861138	16561596	12028	824141220	17619184	17319642	758046	0.893584237799587	0.344507858214751	17240161	823762197	16940619	cela1_red_10_16561596	cela1_red_10_17319642
LG12.c.243.10	Female	-1896.57004117279	-1895.17100640752	12	243	10	252	12019	823383174	16861138	16561596	12028	824141220	17619184	17319642	758046	2.79806953054822	0.0943778775174914	17240161	823762197	16940619	cela1_red_10_16561596	cela1_red_10_17319642
LG12.c.244.10	Both	-2818.05910165045	-2817.61418735492	12	244	10	253	12020	823499653	16977617	16678075	12029	824338234	17816198	17516656	838581	0.889828591062724	0.345523762320382	17396907.5	823918943.5	17097365.5	cela1_red_10_16678075	cela1_red_10_17516656
LG12.c.244.10	Male	-884.662238096911	-884.496804853213	12	244	10	253	12020	823499653	16977617	16678075	12029	824338234	17816198	17516656	838581	0.330866487395724	0.565149313818878	17396907.5	823918943.5	17097365.5	cela1_red_10_16678075	cela1_red_10_17516656
LG12.c.244.10	Female	-1896.5703462854	-1895.82884239724	12	244	10	253	12020	823499653	16977617	16678075	12029	824338234	17816198	17516656	838581	1.48300777631857	0.223304520120538	17396907.5	823918943.5	17097365.5	cela1_red_10_16678075	cela1_red_10_17516656
LG12.c.245.10	Both	-2818.0590041414	-2817.5505599126	12	245	10	254	12021	823565535	17043499	16743957	12030	824367973	17845937	17546395	802438	1.01688845759872	0.313258214436503	17444718	823966754	17145176	cela1_red_10_16743957	cela1_red_10_17546395
LG12.c.245.10	Male	-884.662669862862	-884.411613312338	12	245	10	254	12021	823565535	17043499	16743957	12030	824367973	17845937	17546395	802438	0.502113101049417	0.478573112539042	17444718	823966754	17145176	cela1_red_10_16743957	cela1_red_10_17546395
LG12.c.245.10	Female	-1896.57038052997	-1895.74854628661	12	245	10	254	12021	823565535	17043499	16743957	12030	824367973	17845937	17546395	802438	1.64366848671534	0.199822879351357	17444718	823966754	17145176	cela1_red_10_16743957	cela1_red_10_17546395
LG12.c.246.10	Both	-2818.05510199514	-2817.67323382931	12	246	10	255	12022	823654578	17132542	16833000	12031	824524667	18002631	17703089	870089	0.7637363316544	0.382161770641018	17567586.5	824089622.5	17268044.5	cela1_red_10_16833000	cela1_red_10_17703089
LG12.c.246.10	Male	-884.662829227718	-884.409953943017	12	246	10	255	12022	823654578	17132542	16833000	12031	824524667	18002631	17703089	870089	0.505750569401698	0.476984210989608	17567586.5	824089622.5	17268044.5	cela1_red_10_16833000	cela1_red_10_17703089
LG12.c.246.10	Female	-1896.56737603415	-1895.8029271644	12	246	10	255	12022	823654578	17132542	16833000	12031	824524667	18002631	17703089	870089	1.52889773949983	0.216277949789417	17567586.5	824089622.5	17268044.5	cela1_red_10_16833000	cela1_red_10_17703089
LG12.c.247.10	Both	-2818.05598177946	-2817.42146441307	12	247	10	256	12023	823722824	17200788	16901246	12032	824753022	18230986	17931444	1030198	1.26903473277616	0.259947841491012	17715887	824237923	17416345	cela1_red_10_16901246	cela1_red_10_17931444
LG12.c.247.10	Male	-884.663280409578	-884.276707533267	12	247	10	256	12023	823722824	17200788	16901246	12032	824753022	18230986	17931444	1030198	0.77314575262244	0.379245644444571	17715887	824237923	17416345	cela1_red_10_16901246	cela1_red_10_17931444
LG12.c.247.10	Female	-1896.56775152423	-1895.47370034607	12	247	10	256	12023	823722824	17200788	16901246	12032	824753022	18230986	17931444	1030198	2.18810235631781	0.139080573329211	17715887	824237923	17416345	cela1_red_10_16901246	cela1_red_10_17931444
LG12.c.248.10	Both	-2818.04978274602	-2818.04979265532	12	248	10	257	12024	823745758	17223722	16924180	12033	824841684	18319648	18020106	1095926	-1.98186089619412e-05	1	17771685	824293721	17472143	cela1_red_10_16924180	cela1_red_10_18020106
LG12.c.248.10	Male	-884.663424032299	-884.237566814207	12	248	10	257	12024	823745758	17223722	16924180	12033	824841684	18319648	18020106	1095926	0.851714436183329	0.356067784140677	17771685	824293721	17472143	cela1_red_10_16924180	cela1_red_10_18020106
LG12.c.248.10	Female	-1896.56173566268	-1896.56174544139	12	248	10	257	12024	823745758	17223722	16924180	12033	824841684	18319648	18020106	1095926	-1.95574193639914e-05	1	17771685	824293721	17472143	cela1_red_10_16924180	cela1_red_10_18020106
LG12.c.249.10	Both	-2818.0494936592	-2818.04950410202	12	249	10	258	12025	823783238	17261202	16961660	12034	824963435	18441399	18141857	1180197	-2.08856363315135e-05	1	17851300.5	824373336.5	17551758.5	cela1_red_10_16961660	cela1_red_10_18141857
LG12.c.249.10	Male	-884.663491022774	-884.236529041605	12	249	10	258	12025	823783238	17261202	16961660	12034	824963435	18441399	18141857	1180197	0.853923962339195	0.35544463276632	17851300.5	824373336.5	17551758.5	cela1_red_10_16961660	cela1_red_10_18141857
LG12.c.249.10	Female	-1896.56153426471	-1896.5615445129	12	249	10	258	12025	823783238	17261202	16961660	12034	824963435	18441399	18141857	1180197	-2.04963680516812e-05	1	17851300.5	824373336.5	17551758.5	cela1_red_10_16961660	cela1_red_10_18141857
LG12.c.250.10	Both	-2818.05238688439	-2818.0523928794	12	250	10	259	12026	823800695	17278659	16979117	12035	825009010	18486974	18187432	1208315	-1.19900123536354e-05	1	17882816.5	824404852.5	17583274.5	cela1_red_10_16979117	cela1_red_10_18187432
LG12.c.250.10	Male	-884.664321585724	-884.060162536357	12	250	10	259	12026	823800695	17278659	16979117	12035	825009010	18486974	18187432	1208315	1.20831809873334	0.271665474116827	17882816.5	824404852.5	17583274.5	cela1_red_10_16979117	cela1_red_10_18187432
LG12.c.250.10	Female	-1896.56265866749	-1896.56266697605	12	250	10	259	12026	823800695	17278659	16979117	12035	825009010	18486974	18187432	1208315	-1.66171257660608e-05	1	17882816.5	824404852.5	17583274.5	cela1_red_10_16979117	cela1_red_10_18187432
LG12.c.251.10	Both	-2818.05595155866	-2818.05574780925	12	251	10	260	12027	823992526	17470490	17170948	12036	825146627	18624591	18325049	1154101	0.000407498829190445	0.983894517169567	18047540.5	824569576.5	17747998.5	cela1_red_10_17170948	cela1_red_10_18325049
LG12.c.251.10	Male	-884.663973153501	-884.129572985675	12	251	10	260	12027	823992526	17470490	17170948	12036	825146627	18624591	18325049	1154101	1.06880033565153	0.301216578836883	18047540.5	824569576.5	17747998.5	cela1_red_10_17170948	cela1_red_10_18325049
LG12.c.251.10	Female	-1896.56493420852	-1896.56493760667	12	251	10	260	12027	823992526	17470490	17170948	12036	825146627	18624591	18325049	1154101	-6.79630193189951e-06	1	18047540.5	824569576.5	17747998.5	cela1_red_10_17170948	cela1_red_10_18325049
LG12.c.252.10	Both	-2818.05648778942	-2818.05147487796	12	252	10	261	12028	824141220	17619184	17319642	12037	825167634	18645598	18346056	1026414	0.0100258229267638	0.920241887430515	18132391	824654427	17832849	cela1_red_10_17319642	cela1_red_10_18346056
LG12.c.252.10	Male	-884.663475784907	-884.208249126188	12	252	10	261	12028	824141220	17619184	17319642	12037	825167634	18645598	18346056	1026414	0.910453317439533	0.339994168875523	18132391	824654427	17832849	cela1_red_10_17319642	cela1_red_10_18346056
LG12.c.252.10	Female	-1896.56602935566	-1896.56603418804	12	252	10	261	12028	824141220	17619184	17319642	12037	825167634	18645598	18346056	1026414	-9.6647595455579e-06	1	18132391	824654427	17832849	cela1_red_10_17319642	cela1_red_10_18346056
LG12.c.253.10	Both	-2818.05680413474	-2818.04327162289	12	253	10	262	12029	824338234	17816198	17516656	12038	825198923	18676887	18377345	860689	0.0270650237089285	0.869326125741298	18246542.5	824768578.5	17947000.5	cela1_red_10_17516656	cela1_red_10_18377345
LG12.c.253.10	Male	-884.662693973259	-884.420836793669	12	253	10	262	12029	824338234	17816198	17516656	12038	825198923	18676887	18377345	860689	0.48371435918034	0.48674466428074	18246542.5	824768578.5	17947000.5	cela1_red_10_17516656	cela1_red_10_18377345
LG12.c.253.10	Female	-1896.56695341621	-1896.56005930308	12	253	10	262	12029	824338234	17816198	17516656	12038	825198923	18676887	18377345	860689	0.0137882262629319	0.906524638338406	18246542.5	824768578.5	17947000.5	cela1_red_10_17516656	cela1_red_10_18377345
LG12.c.254.10	Both	-2818.0559122273	-2818.05557360016	12	254	10	263	12030	824367973	17845937	17546395	12039	825290045	18768009	18468467	922072	0.000677254286529205	0.979238108188494	18306973	824829009	18007431	cela1_red_10_17546395	cela1_red_10_18468467
LG12.c.254.10	Male	-884.663528052838	-884.275886603518	12	254	10	263	12030	824367973	17845937	17546395	12039	825290045	18768009	18468467	922072	0.77528289864108	0.378587690745316	18306973	824829009	18007431	cela1_red_10_17546395	cela1_red_10_18468467
LG12.c.254.10	Female	-1896.56579098526	-1896.56579986035	12	254	10	263	12030	824367973	17845937	17546395	12039	825290045	18768009	18468467	922072	-1.77501738107821e-05	1	18306973	824829009	18007431	cela1_red_10_17546395	cela1_red_10_18468467
LG12.c.255.10	Both	-2818.05725832529	-2818.0399302691	12	255	10	264	12031	824524667	18002631	17703089	12040	825354377	18832341	18532799	829710	0.0346561123860738	0.852318097209372	18417486	824939522	18117944	cela1_red_10_17703089	cela1_red_10_18532799
LG12.c.255.10	Male	-884.662903341798	-884.413669111196	12	255	10	264	12031	824524667	18002631	17703089	12040	825354377	18832341	18532799	829710	0.498468461204538	0.480173841094107	18417486	824939522	18117944	cela1_red_10_17703089	cela1_red_10_18532799
LG12.c.255.10	Female	-1896.56651352253	-1896.56651357872	12	255	10	264	12031	824524667	18002631	17703089	12040	825354377	18832341	18532799	829710	-1.12368070404045e-07	1	18417486	824939522	18117944	cela1_red_10_17703089	cela1_red_10_18532799
LG12.c.256.10	Both	-2818.05776607839	-2818.03008298374	12	256	10	265	12032	824753022	18230986	17931444	12041	825502708	18980672	18681130	749686	0.0553661893036406	0.813975731353356	18605829	825127865	18306287	cela1_red_10_17931444	cela1_red_10_18681130
LG12.c.256.10	Male	-884.66275516846	-884.436098128782	12	256	10	265	12032	824753022	18230986	17931444	12041	825502708	18980672	18681130	749686	0.45331407935646	0.500765338068479	18605829	825127865	18306287	cela1_red_10_17931444	cela1_red_10_18681130
LG12.c.256.10	Female	-1896.56716972418	-1896.55925626032	12	256	10	265	12032	824753022	18230986	17931444	12041	825502708	18980672	18681130	749686	0.0158269277117142	0.899886190397688	18605829	825127865	18306287	cela1_red_10_17931444	cela1_red_10_18681130
LG12.c.257.10	Both	-2818.05698715878	-2818.04209121379	12	257	10	266	12033	824841684	18319648	18020106	12042	825535388	19013352	18713810	693704	0.0297918899777869	0.862963278742475	18666500	825188536	18366958	cela1_red_10_18020106	cela1_red_10_18713810
LG12.c.257.10	Male	-884.663551305708	-884.219490805504	12	257	10	266	12033	824841684	18319648	18020106	12042	825535388	19013352	18713810	693704	0.888121000407864	0.345987007362489	18666500	825188536	18366958	cela1_red_10_18020106	cela1_red_10_18713810
LG12.c.257.10	Female	-1896.56745598484	-1896.51934313812	12	257	10	266	12033	824841684	18319648	18020106	12042	825535388	19013352	18713810	693704	0.096225693438555	0.756406843969614	18666500	825188536	18366958	cela1_red_10_18020106	cela1_red_10_18713810
LG12.c.258.10	Both	-2818.05661104612	-2818.05039764848	12	258	10	267	12034	824963435	18441399	18141857	12043	825537815	19015779	18716237	574380	0.0124267952778609	0.911239263577519	18728589	825250625	18429047	cela1_red_10_18141857	cela1_red_10_18716237
LG12.c.258.10	Male	-884.663283337126	-884.253316528716	12	258	10	267	12034	824963435	18441399	18141857	12043	825537815	19015779	18716237	574380	0.819933616819981	0.365199575426092	18728589	825250625	18429047	cela1_red_10_18141857	cela1_red_10_18716237
LG12.c.258.10	Female	-1896.56728424019	-1896.54453434931	12	258	10	267	12034	824963435	18441399	18141857	12043	825537815	19015779	18716237	574380	0.0454997817569165	0.831087686736738	18728589	825250625	18429047	cela1_red_10_18141857	cela1_red_10_18716237
LG12.c.259.10	Both	-2818.05943492798	-2817.97493081684	12	259	10	268	12035	825009010	18486974	18187432	12044	825573774	19051738	18752196	564764	0.169008222276716	0.680994740108964	18769356	825291392	18469814	cela1_red_10_18187432	cela1_red_10_18752196
LG12.c.259.10	Male	-884.663541370682	-884.198974295804	12	259	10	268	12035	825009010	18486974	18187432	12044	825573774	19051738	18752196	564764	0.92913414975601	0.335088016830281	18769356	825291392	18469814	cela1_red_10_18187432	cela1_red_10_18752196
LG12.c.259.10	Female	-1896.56831115028	-1896.47238040909	12	259	10	268	12035	825009010	18486974	18187432	12044	825573774	19051738	18752196	564764	0.191861482389413	0.661371816826089	18769356	825291392	18469814	cela1_red_10_18187432	cela1_red_10_18752196
LG12.c.260.10	Both	-2818.06026696571	-2817.95490514636	12	260	10	269	12036	825146627	18624591	18325049	12045	825600940	19078904	18779362	454313	0.21072363870735	0.646200813760857	18851747.5	825373783.5	18552205.5	cela1_red_10_18325049	cela1_red_10_18779362
LG12.c.260.10	Male	-884.663027933088	-884.297963658826	12	260	10	269	12036	825146627	18624591	18325049	12045	825600940	19078904	18779362	454313	0.730128548524135	0.392841524087673	18851747.5	825373783.5	18552205.5	cela1_red_10_18325049	cela1_red_10_18779362
LG12.c.260.10	Female	-1896.56896338249	-1896.45119979248	12	260	10	269	12036	825146627	18624591	18325049	12045	825600940	19078904	18779362	454313	0.23552718001929	0.627455451780096	18851747.5	825373783.5	18552205.5	cela1_red_10_18325049	cela1_red_10_18779362
LG12.c.261.10	Both	-2818.05857234038	-2818.01552309348	12	261	10	270	12037	825167634	18645598	18346056	12046	825641365	19119329	18819787	473731	0.0860984938108231	0.769196975999333	18882463.5	825404499.5	18582921.5	cela1_red_10_18346056	cela1_red_10_18819787
LG12.c.261.10	Male	-884.663272200795	-884.210690860834	12	261	10	270	12037	825167634	18645598	18346056	12046	825641365	19119329	18819787	473731	0.905162679921432	0.341401168349385	18882463.5	825404499.5	18582921.5	cela1_red_10_18346056	cela1_red_10_18819787
LG12.c.261.10	Female	-1896.56717246939	-1896.55794367737	12	261	10	270	12037	825167634	18645598	18346056	12046	825641365	19119329	18819787	473731	0.0184575840248726	0.891932992113301	18882463.5	825404499.5	18582921.5	cela1_red_10_18346056	cela1_red_10_18819787
LG12.c.262.10	Both	-2818.05808780622	-2818.03194413846	12	262	10	271	12038	825198923	18676887	18377345	12047	825692791	19170755	18871213	493868	0.0522873355203046	0.819129889282554	18923821	825445857	18624279	cela1_red_10_18377345	cela1_red_10_18871213
LG12.c.262.10	Male	-884.663324496761	-884.273003167383	12	262	10	271	12038	825198923	18676887	18377345	12047	825692791	19170755	18871213	493868	0.780642658754914	0.376944663950184	18923821	825445857	18624279	cela1_red_10_18377345	cela1_red_10_18871213
LG12.c.262.10	Female	-1896.56602863492	-1896.56602988033	12	262	10	271	12038	825198923	18676887	18377345	12047	825692791	19170755	18871213	493868	-2.49080130743096e-06	1	18923821	825445857	18624279	cela1_red_10_18377345	cela1_red_10_18871213
LG12.c.263.10	Both	-2818.05627177499	-2818.05369069273	12	263	10	272	12039	825290045	18768009	18468467	12048	825736758	19214722	18915180	446713	0.00516216453343077	0.942722710032715	18991365.5	825513401.5	18691823.5	cela1_red_10_18468467	cela1_red_10_18915180
LG12.c.263.10	Male	-884.664112125656	-884.097676571827	12	263	10	272	12039	825290045	18768009	18468467	12048	825736758	19214722	18915180	446713	1.13287110765782	0.287163754041975	18991365.5	825513401.5	18691823.5	cela1_red_10_18468467	cela1_red_10_18915180
LG12.c.263.10	Female	-1896.56548649772	-1896.56548830392	12	263	10	272	12039	825290045	18768009	18468467	12048	825736758	19214722	18915180	446713	-3.61238335244707e-06	1	18991365.5	825513401.5	18691823.5	cela1_red_10_18468467	cela1_red_10_18915180
LG12.c.264.10	Both	-2818.06113969233	-2817.12167819975	12	264	10	273	12040	825354377	18832341	18532799	12049	825921011	19398975	19099433	566634	1.87892298516454	0.170456607996406	19115658	825637694	18816116	cela1_red_10_18532799	cela1_red_10_19099433
LG12.c.264.10	Male	-884.663373236352	-883.739527337799	12	264	10	273	12040	825354377	18832341	18532799	12049	825921011	19398975	19099433	566634	1.8476917971052	0.174052090838989	19115658	825637694	18816116	cela1_red_10_18532799	cela1_red_10_19099433
LG12.c.264.10	Female	-1896.56836084228	-1895.64726529524	12	264	10	273	12040	825354377	18832341	18532799	12049	825921011	19398975	19099433	566634	1.84219109407786	0.174694354621035	19115658	825637694	18816116	cela1_red_10_18532799	cela1_red_10_19099433
LG12.c.265.10	Both	-2818.0610887216	-2817.20794150927	12	265	10	274	12041	825502708	18980672	18681130	12050	826017428	19495392	19195850	514720	1.70629442465906	0.191466856661394	19238032	825760068	18938490	cela1_red_10_18681130	cela1_red_10_19195850
LG12.c.265.10	Male	-884.663285862487	-883.628082906342	12	265	10	274	12041	825502708	18980672	18681130	12050	826017428	19495392	19195850	514720	2.07040591229065	0.150181545489405	19238032	825760068	18938490	cela1_red_10_18681130	cela1_red_10_19195850
LG12.c.265.10	Female	-1896.56797769409	-1895.9333630299	12	265	10	274	12041	825502708	18980672	18681130	12050	826017428	19495392	19195850	514720	1.26922932839307	0.259911307156647	19238032	825760068	18938490	cela1_red_10_18681130	cela1_red_10_19195850
LG12.c.266.10	Both	-2818.06175781204	-2817.16418145356	12	266	10	275	12042	825535388	19013352	18713810	12051	826034419	19512383	19212841	499031	1.79515271696164	0.180299614166975	19262867.5	825784903.5	18963325.5	cela1_red_10_18713810	cela1_red_10_19212841
LG12.c.266.10	Male	-884.66381871291	-883.409052199021	12	266	10	275	12042	825535388	19013352	18713810	12051	826034419	19512383	19212841	499031	2.50953302777953	0.113159458767643	19262867.5	825784903.5	18963325.5	cela1_red_10_18713810	cela1_red_10_19212841
LG12.c.266.10	Female	-1896.56752051851	-1896.13279450404	12	266	10	275	12042	825535388	19013352	18713810	12051	826034419	19512383	19212841	499031	0.869452028955948	0.351107054849176	19262867.5	825784903.5	18963325.5	cela1_red_10_18713810	cela1_red_10_19212841
LG12.c.267.10	Both	-2818.06200339654	-2817.18400562551	12	267	10	276	12043	825537815	19015779	18716237	12052	826089471	19567435	19267893	551656	1.75599554206292	0.185124781063927	19291607	825813643	18992065	cela1_red_10_18716237	cela1_red_10_19267893
LG12.c.267.10	Male	-884.66253783386	-884.3784379107	12	267	10	276	12043	825537815	19015779	18716237	12052	826089471	19567435	19267893	551656	0.568199846321477	0.450975137477311	19291607	825813643	18992065	cela1_red_10_18716237	cela1_red_10_19267893
LG12.c.267.10	Female	-1896.56701739984	-1896.22837247764	12	267	10	276	12043	825537815	19015779	18716237	12052	826089471	19567435	19267893	551656	0.677289844411007	0.410521521450716	19291607	825813643	18992065	cela1_red_10_18716237	cela1_red_10_19267893
LG12.c.268.10	Both	-2818.06565761897	-2816.93466167424	12	268	10	277	12044	825573774	19051738	18752196	12053	826184774	19662738	19363196	611000	2.26199188945884	0.132583430608219	19357238	825879274	19057696	cela1_red_10_18752196	cela1_red_10_19363196
LG12.c.268.10	Male	-884.662579200253	-884.357220966664	12	268	10	277	12044	825573774	19051738	18752196	12053	826184774	19662738	19363196	611000	0.610716467176871	0.434518175068819	19357238	825879274	19057696	cela1_red_10_18752196	cela1_red_10_19363196
LG12.c.268.10	Female	-1896.56932926512	-1895.92728228356	12	268	10	277	12044	825573774	19051738	18752196	12053	826184774	19662738	19363196	611000	1.28409396312691	0.257139217620723	19357238	825879274	19057696	cela1_red_10_18752196	cela1_red_10_19363196
LG12.c.269.10	Both	-2818.07590277889	-2815.72887673805	12	269	10	278	12045	825600940	19078904	18779362	12054	826207323	19685287	19385745	606383	4.69405208169883	0.0302671899202126	19382095.5	825904131.5	19082553.5	cela1_red_10_18779362	cela1_red_10_19385745
LG12.c.269.10	Male	-884.662518848711	-884.24445714932	12	269	10	278	12045	825600940	19078904	18779362	12054	826207323	19685287	19385745	606383	0.836123398780501	0.360507839568811	19382095.5	825904131.5	19082553.5	cela1_red_10_18779362	cela1_red_10_19385745
LG12.c.269.10	Female	-1896.57523313633	-1894.95592505526	12	269	10	278	12045	825600940	19078904	18779362	12054	826207323	19685287	19385745	606383	3.23861616213571	0.0719213625027841	19382095.5	825904131.5	19082553.5	cela1_red_10_18779362	cela1_red_10_19385745
LG12.c.270.10	Both	-2818.07312931905	-2816.00958606614	12	270	10	279	12046	825641365	19119329	18819787	12055	826347441	19825405	19525863	706076	4.12708650580771	0.0422019486974291	19472367	825994403	19172825	cela1_red_10_18819787	cela1_red_10_19525863
LG12.c.270.10	Male	-884.662422843209	-884.162244226613	12	270	10	279	12046	825641365	19119329	18819787	12055	826347441	19825405	19525863	706076	1.00035723319252	0.317224083325355	19472367	825994403	19172825	cela1_red_10_18819787	cela1_red_10_19525863
LG12.c.270.10	Female	-1896.57382093923	-1895.33452056662	12	270	10	279	12046	825641365	19119329	18819787	12055	826347441	19825405	19525863	706076	2.47860074521896	0.115404881579166	19472367	825994403	19172825	cela1_red_10_18819787	cela1_red_10_19525863
LG12.c.271.10	Both	-2818.07355954503	-2816.41291936478	12	271	10	280	12047	825692791	19170755	18871213	12056	826380700	19858664	19559122	687909	3.32128036050381	0.0683885491206223	19514709.5	826036745.5	19215167.5	cela1_red_10_18871213	cela1_red_10_19559122
LG12.c.271.10	Male	-884.661729501155	-884.490786172117	12	271	10	280	12047	825692791	19170755	18871213	12056	826380700	19858664	19559122	687909	0.341886658075737	0.558742226309983	19514709.5	826036745.5	19215167.5	cela1_red_10_18871213	cela1_red_10_19559122
LG12.c.271.10	Female	-1896.57506203711	-1895.51540095303	12	271	10	280	12047	825692791	19170755	18871213	12056	826380700	19858664	19559122	687909	2.11932216816604	0.145450904762301	19514709.5	826036745.5	19215167.5	cela1_red_10_18871213	cela1_red_10_19559122
LG12.c.272.10	Both	-2818.07325760459	-2816.43870631544	12	272	10	281	12048	825736758	19214722	18915180	12057	826439273	19917237	19617695	702515	3.26910257829786	0.070596232626212	19565979.5	826088015.5	19266437.5	cela1_red_10_18915180	cela1_red_10_19617695
LG12.c.272.10	Male	-884.661673345265	-884.473724715061	12	272	10	281	12048	825736758	19214722	18915180	12057	826439273	19917237	19617695	702515	0.37589726040801	0.53980717350392	19565979.5	826088015.5	19266437.5	cela1_red_10_18915180	cela1_red_10_19617695
LG12.c.272.10	Female	-1896.5750813354	-1895.51742507243	12	272	10	281	12048	825736758	19214722	18915180	12057	826439273	19917237	19617695	702515	2.11531252594068	0.145832280693295	19565979.5	826088015.5	19266437.5	cela1_red_10_18915180	cela1_red_10_19617695
LG12.c.273.10	Both	-2818.09495979392	-2810.65069714581	12	273	10	282	12049	825921011	19398975	19099433	12058	826519623	19997587	19698045	598612	14.8885252962164	0.000114054648580275	19698281	826220317	19398739	cela1_red_10_19099433	cela1_red_10_19698045
LG12.c.273.10	Male	-884.662358684938	-884.177466863587	12	273	10	282	12049	825921011	19398975	19099433	12058	826519623	19997587	19698045	598612	0.969783642702168	0.324734143706182	19698281	826220317	19398739	cela1_red_10_19099433	cela1_red_10_19698045
LG12.c.273.10	Female	-1896.58399120534	-1891.55333560993	12	273	10	282	12049	825921011	19398975	19099433	12058	826519623	19997587	19698045	598612	10.0613111908319	0.00151415426365265	19698281	826220317	19398739	cela1_red_10_19099433	cela1_red_10_19698045
LG12.c.274.10	Both	-2818.09907361664	-2806.83818298105	12	274	10	283	12050	826017428	19495392	19195850	12059	826583942	20061906	19762364	566514	22.5217812711708	2.07774287686036e-06	19778649	826300685	19479107	cela1_red_10_19195850	cela1_red_10_19762364
LG12.c.274.10	Male	-884.662516483165	-883.93209408356	12	274	10	283	12050	826017428	19495392	19195850	12059	826583942	20061906	19762364	566514	1.46084479920978	0.226795752197349	19778649	826300685	19479107	cela1_red_10_19195850	cela1_red_10_19762364
LG12.c.274.10	Female	-1896.58657038121	-1887.79022452093	12	274	10	283	12050	826017428	19495392	19195850	12059	826583942	20061906	19762364	566514	17.5926917205607	2.73637928719372e-05	19778649	826300685	19479107	cela1_red_10_19195850	cela1_red_10_19762364
LG12.c.275.10	Both	-2818.10079811201	-2806.01793486326	12	275	10	284	12051	826034419	19512383	19212841	12060	826649623	20127587	19828045	615204	24.1657264974929	8.83913969018657e-07	19819985	826342021	19520443	cela1_red_10_19212841	cela1_red_10_19828045
LG12.c.275.10	Male	-884.662394740269	-883.91520996548	12	275	10	284	12051	826034419	19512383	19212841	12060	826649623	20127587	19828045	615204	1.49436954957878	0.221539735271221	19819985	826342021	19520443	cela1_red_10_19212841	cela1_red_10_19828045
LG12.c.275.10	Female	-1896.58906969099	-1887.08115033274	12	275	10	284	12051	826034419	19512383	19212841	12060	826649623	20127587	19828045	615204	19.0158387164938	1.29637898911295e-05	19819985	826342021	19520443	cela1_red_10_19212841	cela1_red_10_19828045
LG12.c.276.10	Both	-2818.10570457819	-2805.94689262973	12	276	10	285	12052	826089471	19567435	19267893	12061	826673841	20151805	19852263	584370	24.3176238969299	8.16882347876025e-07	19859620	826381656	19560078	cela1_red_10_19267893	cela1_red_10_19852263
LG12.c.276.10	Male	-884.662040302108	-884.263904001268	12	276	10	285	12052	826089471	19567435	19267893	12061	826673841	20151805	19852263	584370	0.796272601680357	0.372210142147671	19859620	826381656	19560078	cela1_red_10_19267893	cela1_red_10_19852263
LG12.c.276.10	Female	-1896.59276521591	-1887.18340436294	12	276	10	285	12052	826089471	19567435	19267893	12061	826673841	20151805	19852263	584370	18.8187217059399	1.43749147227812e-05	19859620	826381656	19560078	cela1_red_10_19267893	cela1_red_10_19852263
LG12.c.277.10	Both	-2818.10724419203	-2805.19267309258	12	277	10	286	12053	826184774	19662738	19363196	12062	826833739	20311703	20012161	648965	25.8291421989043	3.73013792964727e-07	19987220.5	826509256.5	19687678.5	cela1_red_10_19363196	cela1_red_10_20012161
LG12.c.277.10	Male	-884.66209861263	-884.245830844732	12	277	10	286	12053	826184774	19662738	19363196	12062	826833739	20311703	20012161	648965	0.832535535796069	0.361540375636706	19987220.5	826509256.5	19687678.5	cela1_red_10_19363196	cela1_red_10_20012161
LG12.c.277.10	Female	-1896.59419647139	-1886.60947719115	12	277	10	286	12053	826184774	19662738	19363196	12062	826833739	20311703	20012161	648965	19.9694385604739	7.86898720628315e-06	19987220.5	826509256.5	19687678.5	cela1_red_10_19363196	cela1_red_10_20012161
LG12.c.278.10	Both	-2818.11090309473	-2805.19490628385	12	278	10	287	12054	826207323	19685287	19385745	12063	826892097	20370061	20070519	684774	25.8319936217667	3.72463152431557e-07	20027674	826549710	19728132	cela1_red_10_19385745	cela1_red_10_20070519
LG12.c.278.10	Male	-884.662353525039	-884.18264324324	12	278	10	287	12054	826207323	19685287	19385745	12063	826892097	20370061	20070519	684774	0.959420563597405	0.327332909556462	20027674	826549710	19728132	cela1_red_10_19385745	cela1_red_10_20070519
LG12.c.278.10	Female	-1896.59565192605	-1886.33388310171	12	278	10	287	12054	826207323	19685287	19385745	12063	826892097	20370061	20070519	684774	20.5235376486694	5.89024648289804e-06	20027674	826549710	19728132	cela1_red_10_19385745	cela1_red_10_20070519
LG12.c.279.10	Both	-2818.10078562529	-2806.67551306808	12	279	10	288	12055	826347441	19825405	19525863	12064	826911513	20389477	20089935	564072	22.8505451144074	1.75099660471023e-06	20107441	826629477	19807899	cela1_red_10_19525863	cela1_red_10_20089935
LG12.c.279.10	Male	-884.66216079388	-884.249875763713	12	279	10	288	12055	826347441	19825405	19525863	12064	826911513	20389477	20089935	564072	0.824570060334963	0.363847366932282	20107441	826629477	19807899	cela1_red_10_19525863	cela1_red_10_20089935
LG12.c.279.10	Female	-1896.59032197603	-1887.42333386606	12	279	10	288	12055	826347441	19825405	19525863	12064	826911513	20389477	20089935	564072	18.3339762199512	1.85371518557353e-05	20107441	826629477	19807899	cela1_red_10_19525863	cela1_red_10_20089935
LG12.c.280.10	Both	-2818.10065523311	-2806.54576459948	12	280	10	289	12056	826380700	19858664	19559122	12065	827142310	20620274	20320732	761610	23.1097812672606	1.53010347714311e-06	20239469	826761505	19939927	cela1_red_10_19559122	cela1_red_10_20320732
LG12.c.280.10	Male	-884.662101041404	-884.284934250056	12	280	10	289	12056	826380700	19858664	19559122	12065	827142310	20620274	20320732	761610	0.754333582695608	0.385107651699304	20239469	826761505	19939927	cela1_red_10_19559122	cela1_red_10_20320732
LG12.c.280.10	Female	-1896.59038306788	-1887.53892259191	12	280	10	289	12056	826380700	19858664	19559122	12065	827142310	20620274	20320732	761610	18.1029209519425	2.09280142409174e-05	20239469	826761505	19939927	cela1_red_10_19559122	cela1_red_10_20320732
LG12.c.281.10	Both	-2818.11069770651	-2805.04432016579	12	281	10	290	12057	826439273	19917237	19617695	12066	827297855	20775819	20476277	858582	26.1327550814458	3.1873098260693e-07	20346528	826868564	20046986	cela1_red_10_19617695	cela1_red_10_20476277
LG12.c.281.10	Male	-884.662292545779	-884.166217566253	12	281	10	290	12057	826439273	19917237	19617695	12066	827297855	20775819	20476277	858582	0.99214995905254	0.319217472854435	20346528	826868564	20046986	cela1_red_10_19617695	cela1_red_10_20476277
LG12.c.281.10	Female	-1896.59530586243	-1886.00352302898	12	281	10	290	12057	826439273	19917237	19617695	12066	827297855	20775819	20476277	858582	21.1835656668986	4.17327732471495e-06	20346528	826868564	20046986	cela1_red_10_19617695	cela1_red_10_20476277
LG12.c.282.10	Both	-2818.11295712239	-2804.8864212685	12	282	10	291	12058	826519623	19997587	19698045	12067	827341085	20819049	20519507	821462	26.4530717077696	2.70018757908552e-07	20408318	826930354	20108776	cela1_red_10_19698045	cela1_red_10_20519507
LG12.c.282.10	Male	-884.662328287851	-884.200917258077	12	282	10	291	12058	826519623	19997587	19698045	12067	827341085	20819049	20519507	821462	0.922822059547343	0.336735080976769	20408318	826930354	20108776	cela1_red_10_19698045	cela1_red_10_20519507
LG12.c.282.10	Female	-1896.59678011198	-1885.89799192854	12	282	10	291	12058	826519623	19997587	19698045	12067	827341085	20819049	20519507	821462	21.3975763668795	3.73242701212639e-06	20408318	826930354	20108776	cela1_red_10_19698045	cela1_red_10_20519507
LG12.c.283.10	Both	-2818.11170571208	-2807.85915681027	12	283	10	292	12059	826583942	20061906	19762364	12068	827404788	20882752	20583210	820846	20.5050978036243	5.94726461677908e-06	20472329	826994365	20172787	cela1_red_10_19762364	cela1_red_10_20583210
LG12.c.283.10	Male	-884.661596910137	-884.621227846487	12	283	10	292	12059	826583942	20061906	19762364	12068	827404788	20882752	20583210	820846	0.0807381273000374	0.776299604658953	20472329	826994365	20172787	cela1_red_10_19762364	cela1_red_10_20583210
LG12.c.283.10	Female	-1896.59797171047	-1887.62734502631	12	283	10	292	12059	826583942	20061906	19762364	12068	827404788	20882752	20583210	820846	17.9412533683217	2.27828967733767e-05	20472329	826994365	20172787	cela1_red_10_19762364	cela1_red_10_20583210
LG12.c.284.10	Both	-2818.11912347071	-2806.1482243739	12	284	10	293	12060	826649623	20127587	19828045	12069	827436275	20914239	20614697	786652	23.9417981936012	9.92923953280211e-07	20520913	827042949	20221371	cela1_red_10_19828045	cela1_red_10_20614697
LG12.c.284.10	Male	-884.662257898663	-884.397061499469	12	284	10	293	12060	826649623	20127587	19828045	12069	827436275	20914239	20614697	786652	0.530392798387766	0.466441765707542	20520913	827042949	20221371	cela1_red_10_19828045	cela1_red_10_20614697
LG12.c.284.10	Female	-1896.60114520832	-1886.13599206143	12	284	10	293	12060	826649623	20127587	19828045	12069	827436275	20914239	20614697	786652	20.9303062937806	4.76299221785492e-06	20520913	827042949	20221371	cela1_red_10_19828045	cela1_red_10_20614697
LG12.c.285.10	Both	-2818.1186602666	-2805.64615096508	12	285	10	294	12061	826673841	20151805	19852263	12070	827465373	20943337	20643795	791532	24.9450186030399	5.89887479640616e-07	20547571	827069607	20248029	cela1_red_10_19852263	cela1_red_10_20643795
LG12.c.285.10	Male	-884.662303735635	-884.381121057579	12	285	10	294	12061	826673841	20151805	19852263	12070	827465373	20943337	20643795	791532	0.562365356113332	0.453308771561611	20547571	827069607	20248029	cela1_red_10_19852263	cela1_red_10_20643795
LG12.c.285.10	Female	-1896.60042095661	-1885.73773406108	12	285	10	294	12061	826673841	20151805	19852263	12070	827465373	20943337	20643795	791532	21.7253737910496	3.14602461004565e-06	20547571	827069607	20248029	cela1_red_10_19852263	cela1_red_10_20643795
LG12.c.286.10	Both	-2818.11259420256	-2805.81796134701	12	286	10	295	12062	826833739	20311703	20012161	12071	827573182	21051146	20751604	739443	24.5892657111053	7.09458346181968e-07	20681424.5	827203460.5	20381882.5	cela1_red_10_20012161	cela1_red_10_20751604
LG12.c.286.10	Male	-884.66220987311	-884.368730662382	12	286	10	295	12062	826833739	20311703	20012161	12071	827573182	21051146	20751604	739443	0.586958421456529	0.44359769432617	20681424.5	827203460.5	20381882.5	cela1_red_10_20012161	cela1_red_10_20751604
LG12.c.286.10	Female	-1896.59656287758	-1885.93660225884	12	286	10	295	12062	826833739	20311703	20012161	12071	827573182	21051146	20751604	739443	21.3199212374757	3.88671387585582e-06	20681424.5	827203460.5	20381882.5	cela1_red_10_20012161	cela1_red_10_20751604
LG12.c.287.10	Both	-2818.11467576058	-2805.36335630383	12	287	10	296	12063	826892097	20370061	20070519	12072	827611169	21089133	20789591	719072	25.5026389135155	4.41778255533265e-07	20729597	827251633	20430055	cela1_red_10_20070519	cela1_red_10_20789591
LG12.c.287.10	Male	-884.662343701683	-884.313519372055	12	287	10	296	12063	826892097	20370061	20070519	12072	827611169	21089133	20789591	719072	0.697648659255265	0.403574908499691	20729597	827251633	20430055	cela1_red_10_20070519	cela1_red_10_20789591
LG12.c.287.10	Female	-1896.59674315401	-1885.45108861296	12	287	10	296	12063	826892097	20370061	20070519	12072	827611169	21089133	20789591	719072	22.291309082093	2.34264462894984e-06	20729597	827251633	20430055	cela1_red_10_20070519	cela1_red_10_20789591
LG12.c.288.10	Both	-2818.11263732715	-2803.33506807529	12	288	10	297	12064	826911513	20389477	20089935	12073	827703171	21181135	20881593	791658	29.555138503717	5.43483787973642e-08	20785306	827307342	20485764	cela1_red_10_20089935	cela1_red_10_20881593
LG12.c.288.10	Male	-884.662174746542	-884.359419770292	12	288	10	297	12064	826911513	20389477	20089935	12073	827703171	21181135	20881593	791658	0.605509952499688	0.436483418526462	20785306	827307342	20485764	cela1_red_10_20089935	cela1_red_10_20881593
LG12.c.288.10	Female	-1896.5971200873	-1883.75283030075	12	288	10	297	12064	826911513	20389477	20089935	12073	827703171	21181135	20881593	791658	25.6885795730923	4.01194231836044e-07	20785306	827307342	20485764	cela1_red_10_20089935	cela1_red_10_20881593
LG12.c.289.10	Both	-2818.11692764628	-2802.42536826826	12	289	10	298	12065	827142310	20620274	20320732	12074	827741684	21219648	20920106	599374	31.3831187560463	2.11814565886925e-08	20919961	827441997	20620419	cela1_red_10_20320732	cela1_red_10_20920106
LG12.c.289.10	Male	-884.66283169384	-884.065605578353	12	289	10	298	12065	827142310	20620274	20320732	12074	827741684	21219648	20920106	599374	1.19445223097432	0.274433324682189	20919961	827441997	20620419	cela1_red_10_20320732	cela1_red_10_20920106
LG12.c.289.10	Female	-1896.59864691373	-1883.10932199902	12	289	10	298	12065	827142310	20620274	20320732	12074	827741684	21219648	20920106	599374	26.9786498294188	2.05715210421786e-07	20919961	827441997	20620419	cela1_red_10_20320732	cela1_red_10_20920106
LG12.c.290.10	Both	-2818.12654634088	-2801.97821024069	12	290	10	299	12066	827297855	20775819	20476277	12075	827760920	21238884	20939342	463065	32.2966722003948	1.32339791347746e-08	21007351.5	827529387.5	20707809.5	cela1_red_10_20476277	cela1_red_10_20939342
LG12.c.290.10	Male	-884.662816092957	-884.124808985978	12	290	10	299	12066	827297855	20775819	20476277	12075	827760920	21238884	20939342	463065	1.07601421395839	0.299590917752331	21007351.5	827529387.5	20707809.5	cela1_red_10_20476277	cela1_red_10_20939342
LG12.c.290.10	Female	-1896.60722052318	-1882.53563729408	12	290	10	299	12066	827297855	20775819	20476277	12075	827760920	21238884	20939342	463065	28.1431664582033	1.1266476129812e-07	21007351.5	827529387.5	20707809.5	cela1_red_10_20476277	cela1_red_10_20939342
LG12.c.291.10	Both	-2818.12103085281	-2803.93209842699	12	291	10	300	12067	827341085	20819049	20519507	12076	827798608	21276572	20977030	457523	28.3778648516363	9.97999071161715e-08	21047810.5	827569846.5	20748268.5	cela1_red_10_20519507	cela1_red_10_20977030
LG12.c.291.10	Male	-884.662875767159	-884.131574816819	12	291	10	300	12067	827341085	20819049	20519507	12076	827798608	21276572	20977030	457523	1.06260190068019	0.302622501093226	21047810.5	827569846.5	20748268.5	cela1_red_10_20519507	cela1_red_10_20977030
LG12.c.291.10	Female	-1896.60536866171	-1884.14051427824	12	291	10	300	12067	827341085	20819049	20519507	12076	827798608	21276572	20977030	457523	24.9297087669279	5.94590499058967e-07	21047810.5	827569846.5	20748268.5	cela1_red_10_20519507	cela1_red_10_20977030
LG12.c.292.10	Both	-2818.12848770415	-2803.41786016677	12	292	10	301	12068	827404788	20882752	20583210	12077	827822123	21300087	21000545	417335	29.4212550747525	5.82354193756629e-08	21091419.5	827613455.5	20791877.5	cela1_red_10_20583210	cela1_red_10_21000545
LG12.c.292.10	Male	-884.662986927784	-884.123514200547	12	292	10	301	12068	827404788	20882752	20583210	12077	827822123	21300087	21000545	417335	1.07894545447266	0.298933584831483	21091419.5	827613455.5	20791877.5	cela1_red_10_20583210	cela1_red_10_21000545
LG12.c.292.10	Female	-1896.60911323277	-1883.05509924904	12	292	10	301	12068	827404788	20882752	20583210	12077	827822123	21300087	21000545	417335	27.1080279674438	1.92397302312131e-07	21091419.5	827613455.5	20791877.5	cela1_red_10_20583210	cela1_red_10_21000545
LG12.c.293.10	Both	-2818.10835143496	-2805.10099591997	12	293	10	302	12069	827436275	20914239	20614697	12078	827877326	21355290	21055748	441051	26.0147110299858	3.38825682288935e-07	21134764.5	827656800.5	20835222.5	cela1_red_10_20614697	cela1_red_10_21055748
LG12.c.293.10	Male	-884.662270022302	-884.343186946292	12	293	10	302	12069	827436275	20914239	20614697	12078	827877326	21355290	21055748	441051	0.638166152019721	0.424375641217052	21134764.5	827656800.5	20835222.5	cela1_red_10_20614697	cela1_red_10_21055748
LG12.c.293.10	Female	-1896.59844479592	-1884.77802470011	12	293	10	302	12069	827436275	20914239	20614697	12078	827877326	21355290	21055748	441051	23.6408401916156	1.16097207447652e-06	21134764.5	827656800.5	20835222.5	cela1_red_10_20614697	cela1_red_10_21055748
LG12.c.294.10	Both	-2818.0937939963	-2805.90234895859	12	294	10	303	12070	827465373	20943337	20643795	12079	827914073	21392037	21092495	448700	24.3828900754252	7.8966935512792e-07	21167687	827689723	20868145	cela1_red_10_20643795	cela1_red_10_21092495
LG12.c.294.10	Male	-884.661367221434	-884.640985008848	12	294	10	303	12070	827465373	20943337	20643795	12079	827914073	21392037	21092495	448700	0.0407644251727106	0.839993323848751	21167687	827689723	20868145	cela1_red_10_20643795	cela1_red_10_21092495
LG12.c.294.10	Female	-1896.59108017994	-1885.2671422804	12	294	10	303	12070	827465373	20943337	20643795	12079	827914073	21392037	21092495	448700	22.6478757990944	1.94575214940151e-06	21167687	827689723	20868145	cela1_red_10_20643795	cela1_red_10_21092495
LG12.c.295.10	Both	-2818.0938754571	-2806.96943272706	12	295	10	304	12071	827573182	21051146	20751604	12080	827936763	21414727	21115185	363581	22.2488854600761	2.39497761278518e-06	21232936.5	827754972.5	20933394.5	cela1_red_10_20751604	cela1_red_10_21115185
LG12.c.295.10	Male	-884.661471330106	-884.604117094716	12	295	10	304	12071	827573182	21051146	20751604	12080	827936763	21414727	21115185	363581	0.114708470781807	0.734845994538964	21232936.5	827754972.5	20933394.5	cela1_red_10_20751604	cela1_red_10_21115185
LG12.c.295.10	Female	-1896.58988470038	-1886.62850710786	12	295	10	304	12071	827573182	21051146	20751604	12080	827936763	21414727	21115185	363581	19.9227551850531	8.06348486248609e-06	21232936.5	827754972.5	20933394.5	cela1_red_10_20751604	cela1_red_10_21115185
LG12.c.296.10	Both	-2818.0950766491	-2806.97072079793	12	296	10	305	12072	827611169	21089133	20789591	12081	828003797	21481761	21182219	392628	22.2487117023411	2.39519435107916e-06	21285447	827807483	20985905	cela1_red_10_20789591	cela1_red_10_21182219
LG12.c.296.10	Male	-884.661394718317	-884.641298218185	12	296	10	305	12072	827611169	21089133	20789591	12081	828003797	21481761	21182219	392628	0.0401930002631161	0.841103696677673	21285447	827807483	20985905	cela1_red_10_20789591	cela1_red_10_21182219
LG12.c.296.10	Female	-1896.59030642187	-1886.40992128894	12	296	10	305	12072	827611169	21089133	20789591	12081	828003797	21481761	21182219	392628	20.3607702658487	6.41311105864517e-06	21285447	827807483	20985905	cela1_red_10_20789591	cela1_red_10_21182219
LG12.c.297.10	Both	-2818.11451162835	-2805.95978675827	12	297	10	306	12073	827703171	21181135	20881593	12082	828064106	21542070	21242528	360935	24.3094497401562	8.20356204189743e-07	21361602.5	827883638.5	21062060.5	cela1_red_10_20881593	cela1_red_10_21242528
LG12.c.297.10	Male	-884.661614452848	-884.630302637417	12	297	10	306	12073	827703171	21181135	20881593	12082	828064106	21542070	21242528	360935	0.0626236308626176	0.802396232556503	21361602.5	827883638.5	21062060.5	cela1_red_10_20881593	cela1_red_10_21242528
LG12.c.297.10	Female	-1896.60295609665	-1884.40334879557	12	297	10	306	12073	827703171	21181135	20881593	12082	828064106	21542070	21242528	360935	24.3992146021506	7.83006091742422e-07	21361602.5	827883638.5	21062060.5	cela1_red_10_20881593	cela1_red_10_21242528
LG12.c.298.10	Both	-2818.11968541259	-2806.78689415105	12	298	10	307	12074	827741684	21219648	20920106	12083	828116957	21594921	21295379	375273	22.6655825230773	1.92790351460914e-06	21407284.5	827929320.5	21107742.5	cela1_red_10_20920106	cela1_red_10_21295379
LG12.c.298.10	Male	-884.662751003092	-884.326198155387	12	298	10	307	12074	827741684	21219648	20920106	12083	828116957	21594921	21295379	375273	0.673105695410413	0.411970911282004	21407284.5	827929320.5	21107742.5	cela1_red_10_20920106	cela1_red_10_21295379
LG12.c.298.10	Female	-1896.60403225014	-1884.95808203256	12	298	10	307	12074	827741684	21219648	20920106	12083	828116957	21594921	21295379	375273	23.2919004351556	1.39184903735767e-06	21407284.5	827929320.5	21107742.5	cela1_red_10_20920106	cela1_red_10_21295379
LG12.c.299.10	Both	-2818.11629298169	-2806.66202986263	12	299	10	308	12075	827760920	21238884	20939342	12084	828194016	21671980	21372438	433096	22.9085262381232	1.69896566504235e-06	21455432	827977468	21155890	cela1_red_10_20939342	cela1_red_10_21372438
LG12.c.299.10	Male	-884.662404331197	-884.302587894121	12	299	10	308	12075	827760920	21238884	20939342	12084	828194016	21671980	21372438	433096	0.719632874151785	0.396264359484103	21455432	827977468	21155890	cela1_red_10_20939342	cela1_red_10_21372438
LG12.c.299.10	Female	-1896.60242170635	-1885.10512058274	12	299	10	308	12075	827760920	21238884	20939342	12084	828194016	21671980	21372438	433096	22.994602247205	1.62456893937346e-06	21455432	827977468	21155890	cela1_red_10_20939342	cela1_red_10_21372438
LG12.c.300.10	Both	-2818.10800746432	-2809.4896728717	12	300	10	309	12076	827798608	21276572	20977030	12085	828552536	22030500	21730958	753928	17.236669185243	3.30004905720882e-05	21653536	828175572	21353994	cela1_red_10_20977030	cela1_red_10_21730958
LG12.c.300.10	Male	-884.66244168515	-884.265619144553	12	300	10	309	12076	827798608	21276572	20977030	12085	828552536	22030500	21730958	753928	0.793645081195336	0.3730002038196	21653536	828175572	21353994	cela1_red_10_20977030	cela1_red_10_21730958
LG12.c.300.10	Female	-1896.5945877221	-1889.32276210009	12	300	10	309	12076	827798608	21276572	20977030	12085	828552536	22030500	21730958	753928	14.5436512440178	0.000136949345924675	21653536	828175572	21353994	cela1_red_10_20977030	cela1_red_10_21730958
LG12.c.301.10	Both	-2818.10248648494	-2809.55686427756	12	301	10	310	12077	827822123	21300087	21000545	12086	828629574	22107538	21807996	807451	17.0912444147716	3.56261698331028e-05	21703812.5	828225848.5	21404270.5	cela1_red_10_21000545	cela1_red_10_21807996
LG12.c.301.10	Male	-884.662100888901	-884.35263247325	12	301	10	310	12077	827822123	21300087	21000545	12086	828629574	22107538	21807996	807451	0.61893683130188	0.431442640625559	21703812.5	828225848.5	21404270.5	cela1_red_10_21000545	cela1_red_10_21807996
LG12.c.301.10	Female	-1896.590977824	-1889.28215916309	12	301	10	310	12077	827822123	21300087	21000545	12086	828629574	22107538	21807996	807451	14.6176373218123	0.000131676397234992	21703812.5	828225848.5	21404270.5	cela1_red_10_21000545	cela1_red_10_21807996
LG12.c.302.10	Both	-2818.11392771925	-2808.13431615668	12	302	10	311	12078	827877326	21355290	21055748	12087	828699985	22177949	21878407	822659	19.9592231251399	7.91114139431226e-06	21766619.5	828288655.5	21467077.5	cela1_red_10_21055748	cela1_red_10_21878407
LG12.c.302.10	Male	-884.663333119489	-883.658603107004	12	302	10	311	12078	827877326	21355290	21055748	12087	828699985	22177949	21878407	822659	2.00946002496994	0.156320947892035	21766619.5	828288655.5	21467077.5	cela1_red_10_21055748	cela1_red_10_21878407
LG12.c.302.10	Female	-1896.59657257127	-1888.0113800158	12	302	10	311	12078	827877326	21355290	21055748	12087	828699985	22177949	21878407	822659	17.1703851109287	3.4172239179453e-05	21766619.5	828288655.5	21467077.5	cela1_red_10_21055748	cela1_red_10_21878407
LG12.c.303.10	Both	-2818.1137631344	-2808.85139826267	12	303	10	312	12079	827914073	21392037	21092495	12088	828740886	22218850	21919308	826813	18.5247297434644	1.67714053653789e-05	21805443.5	828327479.5	21505901.5	cela1_red_10_21092495	cela1_red_10_21919308
LG12.c.303.10	Male	-884.66332190803	-883.671514101833	12	303	10	312	12079	827914073	21392037	21092495	12088	828740886	22218850	21919308	826813	1.98361561239358	0.159010027161569	21805443.5	828327479.5	21505901.5	cela1_red_10_21092495	cela1_red_10_21919308
LG12.c.303.10	Female	-1896.59659608524	-1888.88319095756	12	303	10	312	12079	827914073	21392037	21092495	12088	828740886	22218850	21919308	826813	15.4268102553697	8.5762868042405e-05	21805443.5	828327479.5	21505901.5	cela1_red_10_21092495	cela1_red_10_21919308
LG12.c.304.10	Both	-2818.11493302425	-2808.65666296339	12	304	10	313	12080	827936763	21414727	21115185	12089	828877208	22355172	22055630	940445	18.9165401217188	1.36563494123054e-05	21884949.5	828406985.5	21585407.5	cela1_red_10_21115185	cela1_red_10_22055630
LG12.c.304.10	Male	-884.663328971285	-883.603457121634	12	304	10	313	12080	827936763	21414727	21115185	12089	828877208	22355172	22055630	940445	2.11974369930203	0.145410876299386	21884949.5	828406985.5	21585407.5	cela1_red_10_21115185	cela1_red_10_22055630
LG12.c.304.10	Female	-1896.59778961418	-1888.77024683043	12	304	10	313	12080	827936763	21414727	21115185	12089	828877208	22355172	22055630	940445	15.6550855674968	7.60079130240898e-05	21884949.5	828406985.5	21585407.5	cela1_red_10_21115185	cela1_red_10_22055630
LG12.c.305.10	Both	-2818.11335726231	-2808.559337703	12	305	10	314	12081	828003797	21481761	21182219	12090	828991652	22469616	22170074	987855	19.1080391186097	1.23523486754706e-05	21975688.5	828497724.5	21676146.5	cela1_red_10_21182219	cela1_red_10_22170074
LG12.c.305.10	Male	-884.663288363646	-883.568790326207	12	305	10	314	12081	828003797	21481761	21182219	12090	828991652	22469616	22170074	987855	2.18899607487742	0.138999887871062	21975688.5	828497724.5	21676146.5	cela1_red_10_21182219	cela1_red_10_22170074
LG12.c.305.10	Female	-1896.59712184941	-1888.63286220575	12	305	10	314	12081	828003797	21481761	21182219	12090	828991652	22469616	22170074	987855	15.9285192873194	6.5780046926367e-05	21975688.5	828497724.5	21676146.5	cela1_red_10_21182219	cela1_red_10_22170074
LG12.c.306.10	Both	-2818.11427303751	-2808.13325918663	12	306	10	315	12082	828064106	21542070	21242528	12091	829002214	22480178	22180636	938108	19.9620277017711	7.89954573077178e-06	22011124	828533160	21711582	cela1_red_10_21242528	cela1_red_10_22180636
LG12.c.306.10	Male	-884.6634161415	-883.406000792483	12	306	10	315	12082	828064106	21542070	21242528	12091	829002214	22480178	22180636	938108	2.51483069803362	0.112779744969647	22011124	828533160	21711582	cela1_red_10_21242528	cela1_red_10_22180636
LG12.c.306.10	Female	-1896.59775440098	-1888.00868940964	12	306	10	315	12082	828064106	21542070	21242528	12091	829002214	22480178	22180636	938108	17.178129982698	3.40331981495412e-05	22011124	828533160	21711582	cela1_red_10_21242528	cela1_red_10_22180636
LG12.c.307.10	Both	-2818.09114299354	-2810.85655402421	12	307	10	316	12083	828116957	21594921	21295379	12092	829034123	22512087	22212545	917166	14.4691779386603	0.000142471794183252	22053504	828575540	21753962	cela1_red_10_21295379	cela1_red_10_22212545
LG12.c.307.10	Male	-884.663135125123	-883.351927024252	12	307	10	316	12083	828116957	21594921	21295379	12092	829034123	22512087	22212545	917166	2.62241620174223	0.105363892957907	22053504	828575540	21753962	cela1_red_10_21295379	cela1_red_10_22212545
LG12.c.307.10	Female	-1896.58345528313	-1891.56754407314	12	307	10	316	12083	828116957	21594921	21295379	12092	829034123	22512087	22212545	917166	10.0318224199868	0.00153858735785073	22053504	828575540	21753962	cela1_red_10_21295379	cela1_red_10_22212545
LG12.c.308.10	Both	-2818.08098775458	-2811.33966143494	12	308	10	317	12084	828194016	21671980	21372438	12093	829187486	22665450	22365908	993470	13.4826526392771	0.000240779166745586	22168715	828690751	21869173	cela1_red_10_21372438	cela1_red_10_22365908
LG12.c.308.10	Male	-884.662126098204	-884.118727786925	12	308	10	317	12084	828194016	21671980	21372438	12093	829187486	22665450	22365908	993470	1.08679662255804	0.297182065154024	22168715	828690751	21869173	cela1_red_10_21372438	cela1_red_10_22365908
LG12.c.308.10	Female	-1896.57832259667	-1891.87159706599	12	308	10	317	12084	828194016	21671980	21372438	12093	829187486	22665450	22365908	993470	9.41345106135168	0.00215399440064912	22168715	828690751	21869173	cela1_red_10_21372438	cela1_red_10_22365908
LG12.c.309.10	Both	-2818.07753900264	-2810.87051291006	12	309	10	318	12085	828552536	22030500	21730958	12094	829217360	22695324	22395782	664824	14.4140521851623	0.000146703502310608	22362912	828884948	22063370	cela1_red_10_21730958	cela1_red_10_22395782
LG12.c.309.10	Male	-884.662565437533	-883.396794352897	12	309	10	318	12085	828552536	22030500	21730958	12094	829217360	22695324	22395782	664824	2.53154216927214	0.111591105988068	22362912	828884948	22063370	cela1_red_10_21730958	cela1_red_10_22395782
LG12.c.309.10	Female	-1896.57675472751	-1890.21776865905	12	309	10	318	12085	828552536	22030500	21730958	12094	829217360	22695324	22395782	664824	12.717972136923	0.000362158260413747	22362912	828884948	22063370	cela1_red_10_21730958	cela1_red_10_22395782
LG12.c.310.10	Both	-2818.07700560281	-2811.16546797165	12	310	10	319	12086	828629574	22107538	21807996	12095	829245916	22723880	22424338	616342	13.8230752623122	0.000200854233178727	22415709	828937745	22116167	cela1_red_10_21807996	cela1_red_10_22424338
LG12.c.310.10	Male	-884.662711400412	-883.939775398693	12	310	10	319	12086	828629574	22107538	21807996	12095	829245916	22723880	22424338	616342	1.44587200343744	0.229191481182603	22415709	828937745	22116167	cela1_red_10_21807996	cela1_red_10_22424338
LG12.c.310.10	Female	-1896.57653208166	-1890.3773696844	12	310	10	319	12086	828629574	22107538	21807996	12095	829245916	22723880	22424338	616342	12.398324794518	0.000429719183569932	22415709	828937745	22116167	cela1_red_10_21807996	cela1_red_10_22424338
LG12.c.311.10	Both	-2818.07708246051	-2811.02223850278	12	311	10	320	12087	828699985	22177949	21878407	12096	829272271	22750235	22450693	572286	14.1096879154493	0.000172453292661023	22464092	828986128	22164550	cela1_red_10_21878407	cela1_red_10_22450693
LG12.c.311.10	Male	-884.662707524211	-883.586170118272	12	311	10	320	12087	828699985	22177949	21878407	12096	829272271	22750235	22450693	572286	2.15307481187801	0.14228468672881	22464092	828986128	22164550	cela1_red_10_21878407	cela1_red_10_22450693
LG12.c.311.10	Female	-1896.57675814944	-1890.01461302275	12	311	10	320	12087	828699985	22177949	21878407	12096	829272271	22750235	22450693	572286	13.1242902533927	0.00029149176294585	22464092	828986128	22164550	cela1_red_10_21878407	cela1_red_10_22450693
LG12.c.312.10	Both	-2818.05844843096	-2817.06321595854	12	312	10	321	12088	828740886	22218850	21919308	12097	829789764	23267728	22968186	1048878	1.99046494483082	0.158292273777213	22743289	829265325	22443747	cela1_red_10_21919308	cela1_red_10_22968186
LG12.c.312.10	Male	-884.661171101188	-884.661171825005	12	312	10	321	12088	828740886	22218850	21919308	12097	829789764	23267728	22968186	1048878	-1.44763384923863e-06	1	22743289	829265325	22443747	cela1_red_10_21919308	cela1_red_10_22968186
LG12.c.312.10	Female	-1896.56799845345	-1895.3883194208	12	312	10	321	12088	828740886	22218850	21919308	12097	829789764	23267728	22968186	1048878	2.35935806530142	0.124533425347831	22743289	829265325	22443747	cela1_red_10_21919308	cela1_red_10_22968186
LG12.c.313.10	Both	-2818.06163105892	-2816.28983525262	12	313	10	322	12089	828877208	22355172	22055630	12098	829864468	23342432	23042890	987260	3.54359161259708	0.0597758934957455	22848802	829370838	22549260	cela1_red_10_22055630	cela1_sika_10_23042890
LG12.c.313.10	Male	-884.661368243986	-884.532361753298	12	313	10	322	12089	828877208	22355172	22055630	12098	829864468	23342432	23042890	987260	0.258012981375941	0.611488561174616	22848802	829370838	22549260	cela1_red_10_22055630	cela1_sika_10_23042890
LG12.c.313.10	Female	-1896.56974300097	-1894.8111429025	12	313	10	322	12089	828877208	22355172	22055630	12098	829864468	23342432	23042890	987260	3.51720019693357	0.0607349650530825	22848802	829370838	22549260	cela1_red_10_22055630	cela1_sika_10_23042890
LG12.c.314.10	Both	-2818.06139338985	-2816.75646309783	12	314	10	323	12090	828991652	22469616	22170074	12099	829883178	23361142	23061600	891526	2.60986058403159	0.106201098567567	22915379	829437415	22615837	cela1_red_10_22170074	cela1_red_10_23061600
LG12.c.314.10	Male	-884.66179330793	-883.82442565426	12	314	10	323	12090	828991652	22469616	22170074	12099	829883178	23361142	23061600	891526	1.67473530733969	0.195625477677637	22915379	829437415	22615837	cela1_red_10_22170074	cela1_red_10_23061600
LG12.c.314.10	Female	-1896.56795875575	-1895.66318914473	12	314	10	323	12090	828991652	22469616	22170074	12099	829883178	23361142	23061600	891526	1.80953922204026	0.178563514415744	22915379	829437415	22615837	cela1_red_10_22170074	cela1_red_10_23061600
LG12.c.315.10	Both	-2818.06041950282	-2816.95197321614	12	315	10	324	12091	829002214	22480178	22180636	12100	829908178	23386142	25661750	905964	2.21689257336857	0.13650756896783	22933160	829455196	23921193	cela1_red_10_22180636	cela1_red_10_25661750
LG12.c.315.10	Male	-884.661692235328	-883.980757127179	12	315	10	324	12091	829002214	22480178	22180636	12100	829908178	23386142	25661750	905964	1.36187021629848	0.24321361961828	22933160	829455196	23921193	cela1_red_10_22180636	cela1_red_10_25661750
LG12.c.315.10	Female	-1896.56773018997	-1895.84017590571	12	315	10	324	12091	829002214	22480178	22180636	12100	829908178	23386142	25661750	905964	1.4551085685107	0.227710005072374	22933160	829455196	23921193	cela1_red_10_22180636	cela1_red_10_25661750
LG12.c.316.10	Both	-2818.05905207386	-2817.40270754347	12	316	10	325	12092	829034123	22512087	22212545	12101	830044112	23522076	25797684	1009989	1.31268906078913	0.251908362856794	23017081.5	829539117.5	24005114.5	cela1_red_10_22212545	cela1_red_10_25797684
LG12.c.316.10	Male	-884.661731375719	-883.88797657467	12	316	10	325	12092	829034123	22512087	22212545	12101	830044112	23522076	25797684	1009989	1.54750960209708	0.213503467925555	23017081.5	829539117.5	24005114.5	cela1_red_10_22212545	cela1_red_10_25797684
LG12.c.316.10	Female	-1896.56666810251	-1896.25973228692	12	316	10	325	12092	829034123	22512087	22212545	12101	830044112	23522076	25797684	1009989	0.613871631182519	0.43333378549828	23017081.5	829539117.5	24005114.5	cela1_red_10_22212545	cela1_red_10_25797684
LG12.c.317.10	Both	-2818.06015673122	-2817.00850919964	12	317	10	326	12093	829187486	22665450	22365908	12102	830074660	23552624	25828232	887174	2.10329506315429	0.146982089150922	23109037	829631073	24097070	cela1_red_10_22365908	cela1_red_10_25828232
LG12.c.317.10	Male	-884.661746445952	-883.975907353866	12	317	10	326	12093	829187486	22665450	22365908	12102	830074660	23552624	25828232	887174	1.37167818417242	0.241523757624	23109037	829631073	24097070	cela1_red_10_22365908	cela1_red_10_25828232
LG12.c.317.10	Female	-1896.56705925131	-1896.07259878146	12	317	10	326	12093	829187486	22665450	22365908	12102	830074660	23552624	25828232	887174	0.988920939690161	0.320006249331202	23109037	829631073	24097070	cela1_red_10_22365908	cela1_red_10_25828232
LG12.c.318.10	Both	-2818.06227037672	-2815.29877582782	12	318	10	327	12094	829217360	22695324	22395782	12103	830177011	23654975	25930583	959651	5.52698909779974	0.0187253016487819	23175149.5	829697185.5	24163182.5	cela1_red_10_22395782	cela1_red_10_25930583
LG12.c.318.10	Male	-884.661587868295	-884.211259635806	12	318	10	327	12094	829217360	22695324	22395782	12103	830177011	23654975	25930583	959651	0.900656464979193	0.342605749745076	23175149.5	829697185.5	24163182.5	cela1_red_10_22395782	cela1_red_10_25930583
LG12.c.318.10	Female	-1896.56965092909	-1893.93007390526	12	318	10	327	12094	829217360	22695324	22395782	12103	830177011	23654975	25930583	959651	5.2791540476519	0.0215822315568815	23175149.5	829697185.5	24163182.5	cela1_red_10_22395782	cela1_red_10_25930583
LG12.c.319.10	Both	-2818.06192386882	-2814.73262262332	12	319	10	328	12095	829245916	22723880	22424338	12104	830210632	23688596	25964204	964716	6.65860249099114	0.00986782727999025	23206238	829728274	24194271	cela1_red_10_22424338	cela1_red_10_25964204
LG12.c.319.10	Male	-884.660805143726	-884.660811586556	12	319	10	328	12095	829245916	22723880	22424338	12104	830210632	23688596	25964204	964716	-1.28856590890791e-05	1	23206238	829728274	24194271	cela1_red_10_22424338	cela1_red_10_25964204
LG12.c.319.10	Female	-1896.56972153581	-1893.17970313316	12	319	10	328	12095	829245916	22723880	22424338	12104	830210632	23688596	25964204	964716	6.78003680529764	0.0092182989256181	23206238	829728274	24194271	cela1_red_10_22424338	cela1_red_10_25964204
LG12.c.320.10	Both	-2818.06107588631	-2814.64682359746	12	320	10	329	12096	829272271	22750235	22450693	12105	830251677	23729641	26005249	979406	6.82850457771383	0.00897143469548423	23239938	829761974	24227971	cela1_red_10_22450693	cela1_red_10_26005249
LG12.c.320.10	Male	-884.660562099783	-884.660563802657	12	320	10	329	12096	829272271	22750235	22450693	12105	830251677	23729641	26005249	979406	-3.40574706569896e-06	1	23239938	829761974	24227971	cela1_red_10_22450693	cela1_red_10_26005249
LG12.c.320.10	Female	-1896.56952985567	-1893.17073278554	12	320	10	329	12096	829272271	22750235	22450693	12105	830251677	23729641	26005249	979406	6.79759414026239	0.00912807930314874	23239938	829761974	24227971	cela1_red_10_22450693	cela1_red_10_26005249
LG12.c.321.10	Both	-2818.05985441037	-2816.7585350666	12	321	10	330	12097	829789764	23267728	22968186	12106	830287903	23765867	26041475	498139	2.60263868753736	0.106685955850371	23516797.5	830038833.5	24504830.5	cela1_red_10_22968186	cela1_red_10_26041475
LG12.c.321.10	Male	-884.660612485059	-884.660613958102	12	321	10	330	12097	829789764	23267728	22968186	12106	830287903	23765867	26041475	498139	-2.94608571493882e-06	1	23516797.5	830038833.5	24504830.5	cela1_red_10_22968186	cela1_red_10_26041475
LG12.c.321.10	Female	-1896.56816730602	-1896.16984655011	12	321	10	330	12097	829789764	23267728	22968186	12106	830287903	23765867	26041475	498139	0.796641511819871	0.372099403037823	23516797.5	830038833.5	24504830.5	cela1_red_10_22968186	cela1_red_10_26041475
LG12.c.322.10	Both	-2818.05947906758	-2816.65733745	12	322	10	331	12098	829864468	23342432	23042890	12107	830352700	23830664	26106272	488232	2.80428323514752	0.0940128521188281	23586548	830108584	24574581	cela1_sika_10_23042890	cela1_red_10_26106272
LG12.c.322.10	Male	-884.66099270528	-884.660995960401	12	322	10	331	12098	829864468	23342432	23042890	12107	830352700	23830664	26106272	488232	-6.51024220132967e-06	1	23586548	830108584	24574581	cela1_sika_10_23042890	cela1_red_10_26106272
LG12.c.322.10	Female	-1896.56716445973	-1896.21771849342	12	322	10	331	12098	829864468	23342432	23042890	12107	830352700	23830664	26106272	488232	0.698891932615879	0.403156271593728	23586548	830108584	24574581	cela1_sika_10_23042890	cela1_red_10_26106272
LG12.c.323.10	Both	-2818.05640384164	-2817.91749256122	12	323	10	332	12099	829883178	23361142	23061600	12108	830379758	23857722	26133330	496580	0.277822560838104	0.598131951866675	23609432	830131468	24597465	cela1_red_10_23061600	cela1_red_10_26133330
LG12.c.323.10	Male	-884.661118354348	-884.661118646347	12	323	10	332	12099	829883178	23361142	23061600	12108	830379758	23857722	26133330	496580	-5.8399837143952e-07	1	23609432	830131468	24597465	cela1_red_10_23061600	cela1_red_10_26133330
LG12.c.323.10	Female	-1896.56551571663	-1896.56551801114	12	323	10	332	12099	829883178	23361142	23061600	12108	830379758	23857722	26133330	496580	-4.58901922684163e-06	1	23609432	830131468	24597465	cela1_red_10_23061600	cela1_red_10_26133330
LG12.c.324.10	Both	-2818.0576616663	-2817.73283047698	12	324	10	333	12100	829908178	23386142	25661750	12109	830387324	23865288	26140896	479146	0.649662378656103	0.420233413842729	23625715	830147751	25901323	cela1_red_10_25661750	cela1_red_10_26140896
LG12.c.324.10	Male	-884.660693455566	-884.660694573212	12	324	10	333	12100	829908178	23386142	25661750	12109	830387324	23865288	26140896	479146	-2.23529241338838e-06	1	23625715	830147751	25901323	cela1_red_10_25661750	cela1_red_10_26140896
LG12.c.324.10	Female	-1896.56827620327	-1896.30291258489	12	324	10	333	12100	829908178	23386142	25661750	12109	830387324	23865288	26140896	479146	0.530727236759049	0.466301274459693	23625715	830147751	25901323	cela1_red_10_25661750	cela1_red_10_26140896
LG12.c.325.10	Both	-2818.05749740969	-2817.75059061846	12	325	10	334	12101	830044112	23522076	25797684	12110	830414579	23892543	26168151	370467	0.613813582462171	0.433355531527797	23707309.5	830229345.5	25982917.5	cela1_red_10_25797684	cela1_red_10_26168151
LG12.c.325.10	Male	-884.660814223674	-884.660815209185	12	325	10	334	12101	830044112	23522076	25797684	12110	830414579	23892543	26168151	370467	-1.97102212950995e-06	1	23707309.5	830229345.5	25982917.5	cela1_red_10_25797684	cela1_red_10_26168151
LG12.c.325.10	Female	-1896.56836573351	-1896.30850285535	12	325	10	334	12101	830044112	23522076	25797684	12110	830414579	23892543	26168151	370467	0.519725756333628	0.47095868997135	23707309.5	830229345.5	25982917.5	cela1_red_10_25797684	cela1_red_10_26168151
LG12.c.326.10	Both	-2818.06144240096	-2817.1825298483	12	326	10	335	12102	830074660	23552624	25828232	12111	830622626	24100590	26376198	547966	1.75782510532008	0.184896023998856	23826607	830348643	26102215	cela1_red_10_25828232	cela1_red_10_26376198
LG12.c.326.10	Male	-884.660588208518	-884.66058976036	12	326	10	335	12102	830074660	23552624	25828232	12111	830622626	24100590	26376198	547966	-3.10368318423571e-06	1	23826607	830348643	26102215	cela1_red_10_25828232	cela1_red_10_26376198
LG12.c.326.10	Female	-1896.57188846114	-1895.6478375218	12	326	10	335	12102	830074660	23552624	25828232	12111	830622626	24100590	26376198	547966	1.8481018786747	0.174004318582208	23826607	830348643	26102215	cela1_red_10_25828232	cela1_red_10_26376198
LG12.c.328.10	Both	-2818.05827999271	-2817.03793643991	12	328	10	337	12104	830210632	23688596	25964204	12113	830997161	24475125	26750733	786529	2.04068710559295	0.153140458832053	24081860.5	830603896.5	26357468.5	cela1_red_10_25964204	cela1_red_10_26750733
LG12.c.328.10	Male	-884.660872801224	-884.660873830028	12	328	10	337	12104	830210632	23688596	25964204	12113	830997161	24475125	26750733	786529	-2.05760875360284e-06	1	24081860.5	830603896.5	26357468.5	cela1_red_10_25964204	cela1_red_10_26750733
LG12.c.328.10	Female	-1896.56865370126	-1895.85097970082	12	328	10	337	12104	830210632	23688596	25964204	12113	830997161	24475125	26750733	786529	1.43534800088401	0.23089362100119	24081860.5	830603896.5	26357468.5	cela1_red_10_25964204	cela1_red_10_26750733
LG12.c.329.10	Both	-2818.05865358417	-2816.89035884948	12	329	10	338	12105	830251677	23729641	26005249	12114	831042019	24519983	26795591	790342	2.33658946937885	0.126365947735169	24124812	830646848	26400420	cela1_red_10_26005249	cela1_red_10_26795591
LG12.c.329.10	Male	-884.66093154081	-884.660932464085	12	329	10	338	12105	830251677	23729641	26005249	12114	831042019	24519983	26795591	790342	-1.84655027624103e-06	1	24124812	830646848	26400420	cela1_red_10_26005249	cela1_red_10_26795591
LG12.c.329.10	Female	-1896.56855383418	-1895.76902653716	12	329	10	338	12105	830251677	23729641	26005249	12114	831042019	24519983	26795591	790342	1.5990545940349	0.206037240001539	24124812	830646848	26400420	cela1_red_10_26005249	cela1_red_10_26795591
LG12.c.330.10	Both	-2818.05850510911	-2817.04804535846	12	330	10	339	12106	830287903	23765867	26041475	12115	831178785	24656749	26932357	890882	2.02091950129397	0.155145169190941	24211308	830733344	26486916	cela1_red_10_26041475	cela1_red_10_26932357
LG12.c.330.10	Male	-884.661032543248	-884.661033107396	12	330	10	339	12106	830287903	23765867	26041475	12115	831178785	24656749	26932357	890882	-1.1282959349046e-06	1	24211308	830733344	26486916	cela1_red_10_26041475	cela1_red_10_26932357
LG12.c.330.10	Female	-1896.56789853452	-1895.94763880374	12	330	10	339	12106	830287903	23765867	26041475	12115	831178785	24656749	26932357	890882	1.24051946154577	0.26537096440307	24211308	830733344	26486916	cela1_red_10_26041475	cela1_red_10_26932357
LG12.c.331.10	Both	-2818.06063037766	-2816.54134147657	12	331	10	340	12107	830352700	23830664	26106272	12116	831222653	24700617	26976225	869953	3.03857780217731	0.0813071221534086	24265640.5	830787676.5	26541248.5	cela1_red_10_26106272	cela1_red_10_26976225
LG12.c.331.10	Male	-884.661137309893	-884.661137559123	12	331	10	340	12107	830352700	23830664	26106272	12116	831222653	24700617	26976225	869953	-4.98460394737776e-07	1	24265640.5	830787676.5	26541248.5	cela1_red_10_26106272	cela1_red_10_26976225
LG12.c.331.10	Female	-1896.56915585892	-1895.39450936274	12	331	10	340	12107	830352700	23830664	26106272	12116	831222653	24700617	26976225	869953	2.34929299237047	0.125339842095784	24265640.5	830787676.5	26541248.5	cela1_red_10_26106272	cela1_red_10_26976225
LG12.c.332.10	Both	-2818.06126429423	-2816.34168647538	12	332	10	341	12108	830379758	23857722	26133330	12117	831248607	24726571	27002179	868849	3.43915563771134	0.0636682232668321	24292146.5	830814182.5	26567754.5	cela1_red_10_26133330	cela1_sika_10_27002179
LG12.c.332.10	Male	-884.660867483034	-884.660868797015	12	332	10	341	12108	830379758	23857722	26133330	12117	831248607	24726571	27002179	868849	-2.62796129391063e-06	1	24292146.5	830814182.5	26567754.5	cela1_red_10_26133330	cela1_sika_10_27002179
LG12.c.332.10	Female	-1896.56938170701	-1895.22950455957	12	332	10	341	12108	830379758	23857722	26133330	12117	831248607	24726571	27002179	868849	2.67975429487979	0.101631408052278	24292146.5	830814182.5	26567754.5	cela1_red_10_26133330	cela1_sika_10_27002179
LG12.c.333.10	Both	-2818.06163534858	-2816.39808146332	12	333	10	342	12109	830387324	23865288	26140896	12118	831265275	24743239	27018847	877951	3.32710777050943	0.0681466116286464	24304263.5	830826299.5	26579871.5	cela1_red_10_26140896	cela1_red_10_27018847
LG12.c.333.10	Male	-884.660700270557	-884.660702064796	12	333	10	342	12109	830387324	23865288	26140896	12118	831265275	24743239	27018847	877951	-3.58847819370567e-06	1	24304263.5	830826299.5	26579871.5	cela1_red_10_26140896	cela1_red_10_27018847
LG12.c.333.10	Female	-1896.56938631773	-1895.32807933366	12	333	10	342	12109	830387324	23865288	26140896	12118	831265275	24743239	27018847	877951	2.48261396813223	0.115110800245631	24304263.5	830826299.5	26579871.5	cela1_red_10_26140896	cela1_red_10_27018847
LG12.c.334.10	Both	-2818.05752891144	-2817.3488304198	12	334	10	343	12110	830414579	23892543	26168151	12119	831326347	24804311	27079919	911768	1.41739698326182	0.233832322414777	24348427	830870463	26624035	cela1_red_10_26168151	cela1_red_10_27079919
LG12.c.334.10	Male	-884.660768309222	-884.660769876216	12	334	10	343	12110	830414579	23892543	26168151	12119	831326347	24804311	27079919	911768	-3.13398777507246e-06	1	24348427	830870463	26624035	cela1_red_10_26168151	cela1_red_10_27079919
LG12.c.334.10	Female	-1896.56596393873	-1896.28805225522	12	334	10	343	12110	830414579	23892543	26168151	12119	831326347	24804311	27079919	911768	0.555823367033554	0.455947983522661	24348427	830870463	26624035	cela1_red_10_26168151	cela1_red_10_27079919
LG12.c.335.10	Both	-2818.06011619367	-2817.25954953934	12	335	10	344	12111	830622626	24100590	26376198	12120	831353467	24831431	27107039	730841	1.60113330864988	0.205742678304221	24466010.5	830988046.5	26741618.5	cela1_red_10_26376198	cela1_red_10_27107039
LG12.c.335.10	Male	-884.660985879516	-884.660986647433	12	335	10	344	12111	830622626	24100590	26376198	12120	831353467	24831431	27107039	730841	-1.53583482642716e-06	1	24466010.5	830988046.5	26741618.5	cela1_red_10_26376198	cela1_red_10_27107039
LG12.c.335.10	Female	-1896.56631189888	-1896.38419169563	12	335	10	344	12111	830622626	24100590	26376198	12120	831353467	24831431	27107039	730841	0.36424040649672	0.546160601933298	24466010.5	830988046.5	26741618.5	cela1_red_10_26376198	cela1_red_10_27107039
LG12.c.336.10	Both	-2818.05621560996	-2818.05605680061	12	336	10	345	12112	830988050	24466014	26741622	12121	831399885	24877849	27153457	411835	0.000317618693770783	0.985780965772362	24671931.5	831193967.5	26947539.5	cela1_red_10_26741622	cela1_red_10_27153457
LG12.c.336.10	Male	-884.661018551788	-884.661019220514	12	336	10	345	12112	830988050	24466014	26741622	12121	831399885	24877849	27153457	411835	-1.33745174935029e-06	1	24671931.5	831193967.5	26947539.5	cela1_red_10_26741622	cela1_red_10_27153457
LG12.c.336.10	Female	-1896.56323241495	-1896.5632396675	12	336	10	345	12112	830988050	24466014	26741622	12121	831399885	24877849	27153457	411835	-1.45050994433404e-05	1	24671931.5	831193967.5	26947539.5	cela1_red_10_26741622	cela1_red_10_27153457
LG12.c.337.10	Both	-2818.05591107952	-2818.05591149233	12	337	10	346	12113	830997161	24475125	26750733	12122	831474423	24952387	27227995	477262	-8.25623828859534e-07	1	24713756	831235792	26989364	cela1_red_10_26750733	cela1_red_10_27227995
LG12.c.337.10	Male	-884.660820906657	-884.66082219485	12	337	10	346	12113	830997161	24475125	26750733	12122	831474423	24952387	27227995	477262	-2.57638748735189e-06	1	24713756	831235792	26989364	cela1_red_10_26750733	cela1_red_10_27227995
LG12.c.337.10	Female	-1896.56327543868	-1896.56328255938	12	337	10	346	12113	830997161	24475125	26750733	12122	831474423	24952387	27227995	477262	-1.42414019137505e-05	1	24713756	831235792	26989364	cela1_red_10_26750733	cela1_red_10_27227995
LG12.c.338.10	Both	-2818.05577658529	-2818.05577703739	12	338	10	347	12114	831042019	24519983	26795591	12123	831521901	24999865	27275473	479882	-9.04215085029136e-07	1	24759924	831281960	27035532	cela1_red_10_26795591	cela1_red_10_27275473
LG12.c.338.10	Male	-884.660721293348	-884.660722877094	12	338	10	347	12114	831042019	24519983	26795591	12123	831521901	24999865	27275473	479882	-3.16749128614902e-06	1	24759924	831281960	27035532	cela1_red_10_26795591	cela1_red_10_27275473
LG12.c.338.10	Female	-1896.56444474394	-1896.56444875397	12	338	10	347	12114	831042019	24519983	26795591	12123	831521901	24999865	27275473	479882	-8.02005297373398e-06	1	24759924	831281960	27035532	cela1_red_10_26795591	cela1_red_10_27275473
LG12.c.339.10	Both	-2818.0554675431	-2818.05546822319	12	339	10	348	12115	831178785	24656749	26932357	12124	831581161	25059125	27334733	402376	-1.36016933538485e-06	1	24857937	831379973	27133545	cela1_red_10_26932357	cela1_red_10_27334733
LG12.c.339.10	Male	-884.660721280806	-884.660722741157	12	339	10	348	12115	831178785	24656749	26932357	12124	831581161	25059125	27334733	402376	-2.92070262730704e-06	1	24857937	831379973	27133545	cela1_red_10_26932357	cela1_red_10_27334733
LG12.c.339.10	Female	-1896.56462637256	-1896.56462941634	12	339	10	348	12115	831178785	24656749	26932357	12124	831581161	25059125	27334733	402376	-6.08756045039627e-06	1	24857937	831379973	27133545	cela1_red_10_26932357	cela1_red_10_27334733
LG12.c.340.10	Both	-2818.05940236517	-2817.94349261772	12	340	10	349	12116	831222653	24700617	26976225	12125	831714008	25191972	27467580	491355	0.231819494900265	0.630177970156652	24946294.5	831468330.5	27221902.5	cela1_red_10_26976225	cela1_red_10_27467580
LG12.c.340.10	Male	-884.660666924266	-884.660668512569	12	340	10	349	12116	831222653	24700617	26976225	12125	831714008	25191972	27467580	491355	-3.17660624205018e-06	1	24946294.5	831468330.5	27221902.5	cela1_red_10_26976225	cela1_red_10_27467580
LG12.c.340.10	Female	-1896.56864823948	-1896.45821499884	12	340	10	349	12116	831222653	24700617	26976225	12125	831714008	25191972	27467580	491355	0.220866481272424	0.638380494784156	24946294.5	831468330.5	27221902.5	cela1_red_10_26976225	cela1_red_10_27467580
LG12.c.341.10	Both	-2818.05767117948	-2817.85557608984	12	341	10	350	12117	831248607	24726571	27002179	12126	831746398	25224362	27499970	497791	0.404190179274337	0.524933169302425	24975466.5	831497502.5	27251074.5	cela1_sika_10_27002179	cela1_red_10_27499970
LG12.c.341.10	Male	-884.660473620948	-884.660475397534	12	341	10	350	12117	831248607	24726571	27002179	12126	831746398	25224362	27499970	497791	-3.55317342837225e-06	1	24975466.5	831497502.5	27251074.5	cela1_sika_10_27002179	cela1_red_10_27499970
LG12.c.341.10	Female	-1896.5679552791	-1896.28444455101	12	341	10	350	12117	831248607	24726571	27002179	12126	831746398	25224362	27499970	497791	0.567021456180555	0.451444943844041	24975466.5	831497502.5	27251074.5	cela1_sika_10_27002179	cela1_red_10_27499970
LG12.c.342.10	Both	-2818.0555636845	-2818.05927676339	12	342	10	351	12118	831265275	24743239	27018847	12127	831804151	25282115	27557723	538876	-0.00742615778926847	1	25012677	831534713	27288285	cela1_red_10_27018847	cela1_red_10_27557723
LG12.c.342.10	Male	-884.660330873573	-884.660332924428	12	342	10	351	12118	831265275	24743239	27018847	12127	831804151	25282115	27557723	538876	-4.10170832765289e-06	1	25012677	831534713	27288285	cela1_red_10_27018847	cela1_red_10_27557723
LG12.c.342.10	Female	-1896.56708632907	-1896.46588901174	12	342	10	351	12118	831265275	24743239	27018847	12127	831804151	25282115	27557723	538876	0.202394634643952	0.652794869454181	25012677	831534713	27288285	cela1_red_10_27018847	cela1_red_10_27557723
LG12.c.343.10	Both	-2818.05493083222	-2818.05493279082	12	343	10	352	12119	831326347	24804311	27079919	12128	831815770	25293734	27569342	489423	-3.91720095649362e-06	1	25049022.5	831571058.5	27324630.5	cela1_red_10_27079919	cela1_red_10_27569342
LG12.c.343.10	Male	-884.660151881077	-884.66015432571	12	343	10	352	12119	831326347	24804311	27079919	12128	831815770	25293734	27569342	489423	-4.88926480102236e-06	1	25049022.5	831571058.5	27324630.5	cela1_red_10_27079919	cela1_red_10_27569342
LG12.c.343.10	Female	-1896.56696409117	-1896.48285742316	12	343	10	352	12119	831326347	24804311	27079919	12128	831815770	25293734	27569342	489423	0.168213336017288	0.681704578298514	25049022.5	831571058.5	27324630.5	cela1_red_10_27079919	cela1_red_10_27569342
LG12.c.344.10	Both	-2818.05707799149	-2817.97380036264	12	344	10	353	12120	831353467	24831431	27107039	12129	831883960	25361924	27637532	530493	0.166555257709661	0.683191582521032	25096677.5	831618713.5	27372285.5	cela1_red_10_27107039	cela1_sika_10_27637532
LG12.c.344.10	Male	-884.661135575642	-884.661135769925	12	344	10	353	12120	831353467	24831431	27107039	12129	831883960	25361924	27637532	530493	-3.88566149922553e-07	1	25096677.5	831618713.5	27372285.5	cela1_red_10_27107039	cela1_sika_10_27637532
LG12.c.344.10	Female	-1896.56745866474	-1896.4000002839	12	344	10	353	12120	831353467	24831431	27107039	12129	831883960	25361924	27637532	530493	0.334916761679324	0.562778163442416	25096677.5	831618713.5	27372285.5	cela1_red_10_27107039	cela1_sika_10_27637532
LG12.c.345.10	Both	-2818.05620563189	-2817.5088958751	12	345	10	354	12121	831399885	24877849	27153457	12130	831932150	25410114	27685722	532265	1.09461951358207	0.295449935813038	25143981.5	831666017.5	27419589.5	cela1_red_10_27153457	cela1_red_10_27685722
LG12.c.345.10	Male	-884.661027897681	-884.661028255124	12	345	10	354	12121	831399885	24877849	27153457	12130	831932150	25410114	27685722	532265	-7.14885118213715e-07	1	25143981.5	831666017.5	27419589.5	cela1_red_10_27153457	cela1_red_10_27685722
LG12.c.345.10	Female	-1896.56832415908	-1895.928334036	12	345	10	354	12121	831399885	24877849	27153457	12130	831932150	25410114	27685722	532265	1.27998024616954	0.257902708214757	25143981.5	831666017.5	27419589.5	cela1_red_10_27153457	cela1_red_10_27685722
LG12.c.346.10	Both	-2818.05587180492	-2818.0452185351	12	346	10	355	12122	831474423	24952387	27227995	12131	832144120	25622084	27897692	669697	0.0213065396555976	0.883946967492387	25287235.5	831809271.5	27562843.5	cela1_red_10_27227995	cela1_red_10_27897692
LG12.c.346.10	Male	-884.661156715731	-884.66115786274	12	346	10	355	12122	831474423	24952387	27227995	12131	832144120	25622084	27897692	669697	-2.29401734941348e-06	1	25287235.5	831809271.5	27562843.5	cela1_red_10_27227995	cela1_red_10_27897692
LG12.c.346.10	Female	-1896.56798544814	-1896.39708559609	12	346	10	355	12122	831474423	24952387	27227995	12131	832144120	25622084	27897692	669697	0.34179970410969	0.558792236176809	25287235.5	831809271.5	27562843.5	cela1_red_10_27227995	cela1_red_10_27897692
LG12.c.347.10	Both	-2818.05904236784	-2817.77443149702	12	347	10	356	12123	831521901	24999865	27275473	12132	832145019	25622983	27898591	623118	0.569221741626279	0.450568341341047	25311424	831833460	27587032	cela1_red_10_27275473	cela1_sika_10_27898591
LG12.c.347.10	Male	-884.662013911004	-884.473833512145	12	347	10	356	12123	831521901	24999865	27275473	12132	832145019	25622983	27898591	623118	0.37636079771778	0.539557339826188	25311424	831833460	27587032	cela1_red_10_27275473	cela1_sika_10_27898591
LG12.c.347.10	Female	-1896.56893237438	-1896.29388084838	12	347	10	356	12123	831521901	24999865	27275473	12132	832145019	25622983	27898591	623118	0.550103052006762	0.458275590200491	25311424	831833460	27587032	cela1_red_10_27275473	cela1_sika_10_27898591
LG12.c.348.10	Both	-2818.06236103156	-2817.69292818169	12	348	10	357	12124	831581161	25059125	27334733	12133	832148597	25626561	27902169	567436	0.738865699737289	0.39002447736443	25342843	831864879	27618451	cela1_red_10_27334733	cela1_red_10_27902169
LG12.c.348.10	Male	-884.663030446004	-884.173984089739	12	348	10	357	12124	831581161	25059125	27334733	12133	832148597	25626561	27902169	567436	0.978092712528905	0.322670138764258	25342843	831864879	27618451	cela1_red_10_27334733	cela1_red_10_27902169
LG12.c.348.10	Female	-1896.56922632578	-1896.38131035751	12	348	10	357	12124	831581161	25059125	27334733	12133	832148597	25626561	27902169	567436	0.375831936532904	0.53984239828756	25342843	831864879	27618451	cela1_red_10_27334733	cela1_red_10_27902169
LG12.c.349.10	Both	-2818.06332449171	-2817.67531658572	12	349	10	358	12125	831714008	25191972	27467580	12134	832150602	25628566	27904174	436594	0.776015811981779	0.378362422550852	25410269	831932305	27685877	cela1_red_10_27467580	cela1_sika_10_27904174
LG12.c.349.10	Male	-884.663101172479	-884.24641995394	12	349	10	358	12125	831714008	25191972	27467580	12134	832150602	25628566	27904174	436594	0.83336243707754	0.361302043844726	25410269	831932305	27685877	cela1_red_10_27467580	cela1_sika_10_27904174
LG12.c.349.10	Female	-1896.56969995917	-1896.35314339099	12	349	10	358	12125	831714008	25191972	27467580	12134	832150602	25628566	27904174	436594	0.433113136373777	0.510465320115667	25410269	831932305	27685877	cela1_red_10_27467580	cela1_sika_10_27904174
LG12.c.350.10	Both	-2818.05966111149	-2817.97012014632	12	350	10	359	12126	831746398	25224362	27499970	12135	832193180	25671144	27946752	446782	0.179081930341454	0.672163405012589	25447753	831969789	27723361	cela1_red_10_27499970	cela1_red_10_27946752
LG12.c.350.10	Male	-884.663054052274	-884.235576218456	12	350	10	359	12126	831746398	25224362	27499970	12135	832193180	25671144	27946752	446782	0.854955667635068	0.355154173139872	25447753	831969789	27723361	cela1_red_10_27499970	cela1_red_10_27946752
LG12.c.350.10	Female	-1896.56616496317	-1896.56616556291	12	350	10	359	12126	831746398	25224362	27499970	12135	832193180	25671144	27946752	446782	-1.19948617793852e-06	1	25447753	831969789	27723361	cela1_red_10_27499970	cela1_red_10_27946752
LG12.c.351.10	Both	-2818.058838053	-2818.01657702985	12	351	10	360	12127	831804151	25282115	27557723	12136	832220406	25698370	27973978	416255	0.0845220462988436	0.771260307185956	25490242.5	832012278.5	27765850.5	cela1_red_10_27557723	cela1_red_10_27973978
LG12.c.351.10	Male	-884.66305727826	-884.270013651237	12	351	10	360	12127	831804151	25282115	27557723	12136	832220406	25698370	27973978	416255	0.786087254045924	0.375285882414909	25490242.5	832012278.5	27765850.5	cela1_red_10_27557723	cela1_red_10_27973978
LG12.c.351.10	Female	-1896.56575849417	-1896.56575974735	12	351	10	360	12127	831804151	25282115	27557723	12136	832220406	25698370	27973978	416255	-2.50635594056803e-06	1	25490242.5	832012278.5	27765850.5	cela1_red_10_27557723	cela1_red_10_27973978
LG12.c.352.10	Both	-2818.06027527239	-2817.93705300812	12	352	10	361	12128	831815770	25293734	27569342	12137	832255285	25733249	28008857	439515	0.246444528545908	0.619589796192	25513491.5	832035527.5	27789099.5	cela1_red_10_27569342	cela1_red_10_28008857
LG12.c.352.10	Male	-884.663383143611	-883.86219683121	12	352	10	361	12128	831815770	25293734	27569342	12137	832255285	25733249	28008857	439515	1.60237262480177	0.205567299060287	25513491.5	832035527.5	27789099.5	cela1_red_10_27569342	cela1_red_10_28008857
LG12.c.352.10	Female	-1896.56568678111	-1896.56568801584	12	352	10	361	12128	831815770	25293734	27569342	12137	832255285	25733249	28008857	439515	-2.46946501647471e-06	1	25513491.5	832035527.5	27789099.5	cela1_red_10_27569342	cela1_red_10_28008857
LG12.c.353.10	Both	-2818.06091395244	-2817.91601676084	12	353	10	362	12129	831883960	25361924	27637532	12138	832345265	25823229	28098837	461305	0.289794383190383	0.590352324478447	25592576.5	832114612.5	27868184.5	cela1_sika_10_27637532	cela1_red_10_28098837
LG12.c.353.10	Male	-884.663406343037	-883.729975508473	12	353	10	362	12129	831883960	25361924	27637532	12138	832345265	25823229	28098837	461305	1.86686166912773	0.171834949648011	25592576.5	832114612.5	27868184.5	cela1_sika_10_27637532	cela1_red_10_28098837
LG12.c.353.10	Female	-1896.56604896983	-1896.56604980115	12	353	10	362	12129	831883960	25361924	27637532	12138	832345265	25823229	28098837	461305	-1.66262907441705e-06	1	25592576.5	832114612.5	27868184.5	cela1_sika_10_27637532	cela1_red_10_28098837
LG12.c.354.10	Both	-2818.05871490939	-2817.99820741595	12	354	10	363	12130	831932150	25410114	27685722	12139	832426099	25904063	28179671	493949	0.12101498688844	0.727936251084195	25657088.5	832179124.5	27932696.5	cela1_red_10_27685722	cela1_red_10_28179671
LG12.c.354.10	Male	-884.662332086952	-884.274102884282	12	354	10	363	12130	831932150	25410114	27685722	12139	832426099	25904063	28179671	493949	0.776458405338417	0.378226478559297	25657088.5	832179124.5	27932696.5	cela1_red_10_27685722	cela1_red_10_28179671
LG12.c.354.10	Female	-1896.56580593005	-1896.56580709544	12	354	10	363	12130	831932150	25410114	27685722	12139	832426099	25904063	28179671	493949	-2.33076980293845e-06	1	25657088.5	832179124.5	27932696.5	cela1_red_10_27685722	cela1_red_10_28179671
LG12.c.355.10	Both	-2818.06024675093	-2817.95649229331	12	355	10	364	12131	832144120	25622084	27897692	12140	832510063	25988027	28263635	365943	0.207508915238577	0.648726936488097	25805055.5	832327091.5	28080663.5	cela1_red_10_27897692	cela1_red_10_28263635
LG12.c.355.10	Male	-884.66292575578	-883.982909742676	12	355	10	364	12131	832144120	25622084	27897692	12140	832510063	25988027	28263635	365943	1.36003202620873	0.243531931246264	25805055.5	832327091.5	28080663.5	cela1_red_10_27897692	cela1_red_10_28263635
LG12.c.355.10	Female	-1896.56571136182	-1896.56571282694	12	355	10	364	12131	832144120	25622084	27897692	12140	832510063	25988027	28263635	365943	-2.93022276309785e-06	1	25805055.5	832327091.5	28080663.5	cela1_red_10_27897692	cela1_red_10_28263635
LG12.c.356.10	Both	-2818.06088432235	-2817.92521089811	12	356	10	365	12132	832145019	25622983	27898591	12141	832510138	25988102	28263710	365119	0.271346848470785	0.602429722704122	25805542.5	832327578.5	28081150.5	cela1_sika_10_27898591	cela1_red_10_28263710
LG12.c.356.10	Male	-884.662772799618	-884.127822149384	12	356	10	365	12132	832145019	25622983	27898591	12141	832510138	25988102	28263710	365119	1.06990130046916	0.300967740749798	25805542.5	832327578.5	28081150.5	cela1_sika_10_27898591	cela1_red_10_28263710
LG12.c.356.10	Female	-1896.56634559078	-1896.56634605227	12	356	10	365	12132	832145019	25622983	27898591	12141	832510138	25988102	28263710	365119	-9.22981598705519e-07	1	25805542.5	832327578.5	28081150.5	cela1_sika_10_27898591	cela1_red_10_28263710
LG12.c.357.10	Both	-2818.07572882533	-2815.82613522674	12	357	10	366	12133	832148597	25626561	27902169	12142	832696782	26174746	28450354	548185	4.49918719717243	0.0339109686725962	25900653.5	832422689.5	28176261.5	cela1_red_10_27902169	cela1_red_10_28450354
LG12.c.357.10	Male	-884.663633015515	-883.215637089434	12	357	10	366	12133	832148597	25626561	27902169	12142	832696782	26174746	28450354	548185	2.89599185216048	0.0888001057179939	25900653.5	832422689.5	28176261.5	cela1_red_10_27902169	cela1_red_10_28450354
LG12.c.357.10	Female	-1896.5712115104	-1896.25639151146	12	357	10	366	12133	832148597	25626561	27902169	12142	832696782	26174746	28450354	548185	0.629639997864615	0.427487395780598	25900653.5	832422689.5	28176261.5	cela1_red_10_27902169	cela1_red_10_28450354
LG12.c.358.10	Both	-2818.07860448225	-2815.01101491896	12	358	10	367	12134	832150602	25628566	27904174	12143	832754748	26232712	28508320	604146	6.13517912658062	0.0132518121578157	25930639	832452675	28206247	cela1_sika_10_27904174	cela1_red_10_28508320
LG12.c.358.10	Male	-884.665360488379	-881.718421013839	12	358	10	367	12134	832150602	25628566	27904174	12143	832754748	26232712	28508320	604146	5.893878949081	0.0151935979161059	25930639	832452675	28206247	cela1_sika_10_27904174	cela1_red_10_28508320
LG12.c.358.10	Female	-1896.57089602848	-1896.21283415806	12	358	10	367	12134	832150602	25628566	27904174	12143	832754748	26232712	28508320	604146	0.716123740838611	0.397418343410377	25930639	832452675	28206247	cela1_sika_10_27904174	cela1_red_10_28508320
LG12.c.359.10	Both	-2818.07819273296	-2814.72305971947	12	359	10	368	12135	832193180	25671144	27946752	12144	832795099	26273063	28548671	601919	6.71026602699112	0.00958594231881538	25972103.5	832494139.5	28247711.5	cela1_red_10_27946752	cela1_red_10_28548671
LG12.c.359.10	Male	-884.665305208201	-881.681029798237	12	359	10	368	12135	832193180	25671144	27946752	12144	832795099	26273063	28548671	601919	5.96855081992794	0.0145632443668001	25972103.5	832494139.5	28247711.5	cela1_red_10_27946752	cela1_red_10_28548671
LG12.c.359.10	Female	-1896.57112774885	-1896.08430444586	12	359	10	368	12135	832193180	25671144	27946752	12144	832795099	26273063	28548671	601919	0.973646605970316	0.323772406703232	25972103.5	832494139.5	28247711.5	cela1_red_10_27946752	cela1_red_10_28548671
LG12.c.360.10	Both	-2818.07802437215	-2814.76080451315	12	360	10	369	12136	832220406	25698370	27973978	12145	832939448	26417412	28693020	719042	6.63443971800189	0.0100025651076499	26057891	832579927	28333499	cela1_red_10_27973978	cela1_red_10_28693020
LG12.c.360.10	Male	-884.66526688545	-881.633069144332	12	360	10	369	12136	832220406	25698370	27973978	12145	832939448	26417412	28693020	719042	6.06439548223489	0.0137933958523092	26057891	832579927	28333499	cela1_red_10_27973978	cela1_red_10_28693020
LG12.c.360.10	Female	-1896.57110101106	-1896.10853765192	12	360	10	369	12136	832220406	25698370	27973978	12145	832939448	26417412	28693020	719042	0.925126718272622	0.336132454242518	26057891	832579927	28333499	cela1_red_10_27973978	cela1_red_10_28693020
LG12.c.361.10	Both	-2818.07762412174	-2814.80080927416	12	361	10	370	12137	832255285	25733249	28008857	12146	833081398	26559362	28834970	826113	6.55362969516136	0.0104670416419903	26146305.5	832668341.5	28421913.5	cela1_red_10_28008857	cela1_red_10_28834970
LG12.c.361.10	Male	-884.665258417591	-881.709853000026	12	361	10	370	12137	832255285	25733249	28008857	12146	833081398	26559362	28834970	826113	5.91081083512995	0.0150482438949123	26146305.5	832668341.5	28421913.5	cela1_red_10_28008857	cela1_red_10_28834970
LG12.c.361.10	Female	-1896.57097368333	-1896.10320503287	12	361	10	370	12137	832255285	25733249	28008857	12146	833081398	26559362	28834970	826113	0.935537300917531	0.333428182470752	26146305.5	832668341.5	28421913.5	cela1_red_10_28008857	cela1_red_10_28834970
LG12.c.362.10	Both	-2818.07581705973	-2815.06335437325	12	362	10	371	12138	832345265	25823229	28098837	12147	833177823	26655787	28931395	832558	6.0249253729753	0.014105228128005	26239508	832761544	28515116	cela1_red_10_28098837	cela1_red_10_28931395
LG12.c.362.10	Male	-884.666204224284	-881.461874717131	12	362	10	371	12138	832345265	25823229	28098837	12147	833177823	26655787	28931395	832558	6.40865901430698	0.011356515079644	26239508	832761544	28515116	cela1_red_10_28098837	cela1_red_10_28931395
LG12.c.362.10	Female	-1896.5706471859	-1896.1288407271	12	362	10	371	12138	832345265	25823229	28098837	12147	833177823	26655787	28931395	832558	0.883612917594292	0.347214036241801	26239508	832761544	28515116	cela1_red_10_28098837	cela1_red_10_28931395
LG12.c.363.10	Both	-2818.08614455376	-2814.3424609368	12	363	10	372	12139	832426099	25904063	28179671	12148	833247707	26725671	29001279	821608	7.48736723392631	0.0062133332452966	26314867	832836903	28590475	cela1_red_10_28179671	cela1_red_10_29001279
LG12.c.363.10	Male	-884.667357554657	-881.537480863717	12	363	10	372	12139	832426099	25904063	28179671	12148	833247707	26725671	29001279	821608	6.25975338187936	0.0123511396132292	26314867	832836903	28590475	cela1_red_10_28179671	cela1_red_10_29001279
LG12.c.363.10	Female	-1896.57598422536	-1895.3152662464	12	363	10	372	12139	832426099	25904063	28179671	12148	833247707	26725671	29001279	821608	2.52143595791995	0.112308273564222	26314867	832836903	28590475	cela1_red_10_28179671	cela1_red_10_29001279
LG12.c.364.10	Both	-2818.08808546518	-2814.28269938169	12	364	10	373	12140	832510063	25988027	28263635	12149	833333493	26811457	29087065	823430	7.61077216697231	0.00580206329256827	26399742	832921778	28675350	cela1_red_10_28263635	cela1_red_10_29087065
LG12.c.364.10	Male	-884.668651871151	-881.36798611848	12	364	10	373	12140	832510063	25988027	28263635	12149	833333493	26811457	29087065	823430	6.60133150534148	0.0101902534806002	26399742	832921778	28675350	cela1_red_10_28263635	cela1_red_10_29087065
LG12.c.364.10	Female	-1896.57600123522	-1895.30769795869	12	364	10	373	12140	832510063	25988027	28263635	12149	833333493	26811457	29087065	823430	2.5366065530693	0.111233619192523	26399742	832921778	28675350	cela1_red_10_28263635	cela1_red_10_29087065
LG12.c.365.10	Both	-2818.09085936414	-2814.0459697945	12	365	10	374	12141	832510138	25988102	28263710	12150	833402530	26880494	29156102	892392	8.08977913927265	0.00445155867622837	26434298	832956334	28709906	cela1_red_10_28263710	cela1_red_10_29156102
LG12.c.365.10	Male	-884.668129689878	-881.343306434425	12	365	10	374	12141	832510138	25988102	28263710	12150	833402530	26880494	29156102	892392	6.64964651090577	0.00991754983581239	26434298	832956334	28709906	cela1_red_10_28263710	cela1_red_10_29156102
LG12.c.365.10	Female	-1896.57775173056	-1894.96884928694	12	365	10	374	12141	832510138	25988102	28263710	12150	833402530	26880494	29156102	892392	3.21780488724244	0.0728412496602062	26434298	832956334	28709906	cela1_red_10_28263710	cela1_red_10_29156102
LG12.c.366.10	Both	-2818.09424000983	-2813.81989989553	12	366	10	375	12142	832696782	26174746	28450354	12151	833488128	26966092	29241700	791346	8.54868022859773	0.00345772824333179	26570419	833092455	28846027	cela1_red_10_28450354	cela1_red_10_29241700
LG12.c.366.10	Male	-884.669967711298	-880.915082135581	12	366	10	375	12142	832696782	26174746	28450354	12151	833488128	26966092	29241700	791346	7.50977115143428	0.00613651679838523	26570419	833092455	28846027	cela1_red_10_28450354	cela1_red_10_29241700
LG12.c.366.10	Female	-1896.57808194192	-1894.90035864548	12	366	10	375	12142	832696782	26174746	28450354	12151	833488128	26966092	29241700	791346	3.35544659288007	0.0669830395929528	26570419	833092455	28846027	cela1_red_10_28450354	cela1_red_10_29241700
LG12.c.367.10	Both	-2818.07839588668	-2815.67446984191	12	367	10	376	12143	832754748	26232712	28508320	12152	833547929	27025893	29301501	793181	4.80785208952784	0.028330335718331	26629302.5	833151338.5	28904910.5	cela1_red_10_28508320	cela1_red_10_29301501
LG12.c.367.10	Male	-884.668309726316	-882.099393969401	12	367	10	376	12143	832754748	26232712	28508320	12152	833547929	27025893	29301501	793181	5.1378315138295	0.0234098715134099	26629302.5	833151338.5	28904910.5	cela1_red_10_28508320	cela1_red_10_29301501
LG12.c.367.10	Female	-1896.57268281822	-1895.64507553019	12	367	10	376	12143	832754748	26232712	28508320	12152	833547929	27025893	29301501	793181	1.85521457606228	0.1731781243017	26629302.5	833151338.5	28904910.5	cela1_red_10_28508320	cela1_red_10_29301501
LG12.c.368.10	Both	-2818.07375303745	-2816.12994740085	12	368	10	377	12144	832795099	26273063	28548671	12153	833630856	27108820	29384428	835757	3.88761127321413	0.0486435628970598	26690941.5	833212977.5	28966549.5	cela1_red_10_28548671	cela1_red_10_29384428
LG12.c.368.10	Male	-884.665772276594	-882.907452930159	12	368	10	377	12144	832795099	26273063	28548671	12153	833630856	27108820	29384428	835757	3.5166386928704	0.0607555472821397	26690941.5	833212977.5	28966549.5	cela1_red_10_28548671	cela1_red_10_29384428
LG12.c.368.10	Female	-1896.57177081152	-1895.88358008571	12	368	10	377	12144	832795099	26273063	28548671	12153	833630856	27108820	29384428	835757	1.3763814516069	0.240718480648435	26690941.5	833212977.5	28966549.5	cela1_red_10_28548671	cela1_red_10_29384428
LG12.c.369.10	Both	-2818.08157455517	-2815.79137773934	12	369	10	378	12145	832939448	26417412	28693020	12154	833822955	27300919	29576527	883507	4.58039363165972	0.0323397849857465	26859165.5	833381201.5	29134773.5	cela1_red_10_28693020	cela1_red_10_29576527
LG12.c.369.10	Male	-884.667107546782	-882.366794342164	12	369	10	378	12145	832939448	26417412	28693020	12154	833822955	27300919	29576527	883507	4.6006264092357	0.0319602765445394	26859165.5	833381201.5	29134773.5	cela1_red_10_28693020	cela1_red_10_29576527
LG12.c.369.10	Female	-1896.5728735362	-1895.83416962379	12	369	10	378	12145	832939448	26417412	28693020	12154	833822955	27300919	29576527	883507	1.47740782483015	0.224180532965356	26859165.5	833381201.5	29134773.5	cela1_red_10_28693020	cela1_red_10_29576527
LG12.c.370.10	Both	-2818.08119992818	-2815.91892067582	12	370	10	379	12146	833081398	26559362	28834970	12155	833860763	27338727	29614335	779365	4.32455850471615	0.0375661582745072	26949044.5	833471080.5	29224652.5	cela1_red_10_28834970	cela1_red_10_29614335
LG12.c.370.10	Male	-884.667384021949	-882.366480409289	12	370	10	379	12146	833081398	26559362	28834970	12155	833860763	27338727	29614335	779365	4.60180722531936	0.0319382718953288	26949044.5	833471080.5	29224652.5	cela1_red_10_28834970	cela1_red_10_29614335
LG12.c.370.10	Female	-1896.5728970174	-1895.84120979815	12	370	10	379	12146	833081398	26559362	28834970	12155	833860763	27338727	29614335	779365	1.46337443849598	0.226393974583136	26949044.5	833471080.5	29224652.5	cela1_red_10_28834970	cela1_red_10_29614335
LG12.c.371.10	Both	-2818.08917360087	-2815.3624471472	12	371	10	380	12147	833177823	26655787	28931395	12156	833927484	27405448	29681056	749661	5.45345290734258	0.0195296899511257	27030617.5	833552653.5	29306225.5	cela1_red_10_28931395	cela1_red_10_29681056
LG12.c.371.10	Male	-884.669288660716	-881.89224919768	12	371	10	380	12147	833177823	26655787	28931395	12156	833927484	27405448	29681056	749661	5.5540789260715	0.0184376719848692	27030617.5	833552653.5	29306225.5	cela1_red_10_28931395	cela1_red_10_29681056
LG12.c.371.10	Female	-1896.57480163573	-1895.63385832274	12	371	10	380	12147	833177823	26655787	28931395	12156	833927484	27405448	29681056	749661	1.88188662596349	0.170119875248206	27030617.5	833552653.5	29306225.5	cela1_red_10_28931395	cela1_red_10_29681056
LG12.c.372.10	Both	-2818.09270579629	-2815.19359689639	12	372	10	381	12148	833247707	26725671	29001279	12157	834014988	27492952	29768560	767281	5.79821779978829	0.0160424272453124	27109311.5	833631347.5	29384919.5	cela1_red_10_29001279	cela1_red_10_29768560
LG12.c.372.10	Male	-884.669161005491	-881.698201965234	12	372	10	381	12148	833247707	26725671	29001279	12157	834014988	27492952	29768560	767281	5.94191808051278	0.0147849201755187	27109311.5	833631347.5	29384919.5	cela1_red_10_29001279	cela1_red_10_29768560
LG12.c.372.10	Female	-1896.57642572766	-1895.61908192131	12	372	10	381	12148	833247707	26725671	29001279	12157	834014988	27492952	29768560	767281	1.91468761270198	0.166443479449064	27109311.5	833631347.5	29384919.5	cela1_red_10_29001279	cela1_red_10_29768560
LG12.c.373.10	Both	-2818.08406294619	-2816.20156782648	12	373	10	382	12149	833333493	26811457	29087065	12158	834073348	27551312	29826920	739855	3.76499023942324	0.0523361636011497	27181384.5	833703420.5	29456992.5	cela1_red_10_29087065	cela1_red_10_29826920
LG12.c.373.10	Male	-884.668150337826	-881.992269359921	12	373	10	382	12149	833333493	26811457	29087065	12158	834073348	27551312	29826920	739855	5.35176195580902	0.0207013409866308	27181384.5	833703420.5	29456992.5	cela1_red_10_29087065	cela1_red_10_29826920
LG12.c.373.10	Female	-1896.57140211801	-1896.328238143	12	373	10	382	12149	833333493	26811457	29087065	12158	834073348	27551312	29826920	739855	0.486327950009581	0.485569910450404	27181384.5	833703420.5	29456992.5	cela1_red_10_29087065	cela1_red_10_29826920
LG12.c.374.10	Both	-2818.0916228027	-2815.37480820354	12	374	10	383	12150	833402530	26880494	29156102	12159	834108532	27586496	29862104	706002	5.43362919832362	0.0197525883347779	27233495	833755531	29509103	cela1_red_10_29156102	cela1_red_10_29862104
LG12.c.374.10	Male	-884.668008128166	-881.738415229377	12	374	10	383	12150	833402530	26880494	29156102	12159	834108532	27586496	29862104	706002	5.85918579757822	0.0154959606280386	27233495	833755531	29509103	cela1_red_10_29156102	cela1_red_10_29862104
LG12.c.374.10	Female	-1896.57594864896	-1895.84200748153	12	374	10	383	12150	833402530	26880494	29156102	12159	834108532	27586496	29862104	706002	1.4678823348645	0.225680110978284	27233495	833755531	29509103	cela1_red_10_29156102	cela1_red_10_29862104
LG12.c.375.10	Both	-2818.08563462224	-2815.28192056286	12	375	10	384	12151	833488128	26966092	29241700	12160	834179543	27657507	29933115	691415	5.60742811875025	0.0178844938613274	27311799.5	833833835.5	29587407.5	cela1_red_10_29241700	cela1_red_10_29933115
LG12.c.375.10	Male	-884.668177761177	-880.431390596269	12	375	10	384	12151	833488128	26966092	29241700	12160	834179543	27657507	29933115	691415	8.47357432981494	0.00360342682922865	27311799.5	833833835.5	29587407.5	cela1_red_10_29241700	cela1_red_10_29933115
LG12.c.375.10	Female	-1896.57290550389	-1896.04528851564	12	375	10	384	12151	833488128	26966092	29241700	12160	834179543	27657507	29933115	691415	1.05523397650222	0.304304727006938	27311799.5	833833835.5	29587407.5	cela1_red_10_29241700	cela1_red_10_29933115
LG12.c.376.10	Both	-2818.08117168983	-2815.39955672858	12	376	10	385	12152	833547929	27025893	29301501	12161	834198236	27676200	29951808	650307	5.3632299225028	0.0205656500059788	27351046.5	833873082.5	29626654.5	cela1_red_10_29301501	cela1_red_10_29951808
LG12.c.376.10	Male	-884.666375600273	-880.961799674532	12	376	10	385	12152	833547929	27025893	29301501	12161	834198236	27676200	29951808	650307	7.40915185148287	0.00648929089138317	27351046.5	833873082.5	29626654.5	cela1_red_10_29301501	cela1_red_10_29951808
LG12.c.376.10	Female	-1896.57190349589	-1896.09244379894	12	376	10	385	12152	833547929	27025893	29301501	12161	834198236	27676200	29951808	650307	0.95891939390458	0.327459285953626	27351046.5	833873082.5	29626654.5	cela1_red_10_29301501	cela1_red_10_29951808
LG12.c.377.10	Both	-2818.08057331249	-2815.33314239985	12	377	10	386	12153	833630856	27108820	29384428	12162	834230597	27708561	29984169	599741	5.49486182527744	0.0190724349038772	27408690.5	833930726.5	29684298.5	cela1_red_10_29384428	cela1_red_10_29984169
LG12.c.377.10	Male	-884.6662375427	-880.732314618334	12	377	10	386	12153	833630856	27108820	29384428	12162	834230597	27708561	29984169	599741	7.86784584873135	0.00503215651525901	27408690.5	833930726.5	29684298.5	cela1_red_10_29384428	cela1_red_10_29984169
LG12.c.377.10	Female	-1896.5720148678	-1896.04778327376	12	377	10	386	12153	833630856	27108820	29384428	12162	834230597	27708561	29984169	599741	1.04846318807449	0.305861294091904	27408690.5	833930726.5	29684298.5	cela1_red_10_29384428	cela1_red_10_29984169
LG12.c.378.10	Both	-2818.0820166785	-2815.22784388758	12	378	10	387	12154	833822955	27300919	29576527	12163	834310279	27788243	30063851	487324	5.70834558184924	0.0168844445433273	27544581	834066617	29820189	cela1_red_10_29576527	cela1_red_10_30063851
LG12.c.378.10	Male	-884.667560458986	-880.514447155761	12	378	10	387	12154	833822955	27300919	29576527	12163	834310279	27788243	30063851	487324	8.30622660644872	0.003950938997061	27544581	834066617	29820189	cela1_red_10_29576527	cela1_red_10_30063851
LG12.c.378.10	Female	-1896.57237570449	-1895.9861048849	12	378	10	387	12154	833822955	27300919	29576527	12163	834310279	27788243	30063851	487324	1.17254163917733	0.278879616928092	27544581	834066617	29820189	cela1_red_10_29576527	cela1_red_10_30063851
LG12.c.379.10	Both	-2818.07599387626	-2815.59419035164	12	379	10	388	12155	833860763	27338727	29614335	12164	834338095	27816059	30091667	477332	4.96360704923882	0.0258861567437124	27577393	834099429	29853001	cela1_red_10_29614335	cela1_red_10_30091667
LG12.c.379.10	Male	-884.666100870569	-881.271990773952	12	379	10	388	12155	833860763	27338727	29614335	12164	834338095	27816059	30091667	477332	6.78822019323366	0.00917613492618663	27577393	834099429	29853001	cela1_red_10_29614335	cela1_red_10_30091667
LG12.c.379.10	Female	-1896.57187385541	-1895.94424866595	12	379	10	388	12155	833860763	27338727	29614335	12164	834338095	27816059	30091667	477332	1.25525037892385	0.262552047524291	27577393	834099429	29853001	cela1_red_10_29614335	cela1_red_10_30091667
LG12.c.380.10	Both	-2818.0782634855	-2815.50270631438	12	380	10	389	12156	833927484	27405448	29681056	12165	834378322	27856286	30131894	450838	5.15111434224036	0.0232314598338667	27630867	834152903	29906475	cela1_red_10_29681056	cela1_red_10_30131894
LG12.c.380.10	Male	-884.667432138065	-881.105297428852	12	380	10	389	12156	833927484	27405448	29681056	12165	834378322	27856286	30131894	450838	7.12426941842546	0.00760473962716246	27630867	834152903	29906475	cela1_red_10_29681056	cela1_red_10_30131894
LG12.c.380.10	Female	-1896.57197645439	-1896.05677591281	12	380	10	389	12156	833927484	27405448	29681056	12165	834378322	27856286	30131894	450838	1.03040108315599	0.310064483394906	27630867	834152903	29906475	cela1_red_10_29681056	cela1_red_10_30131894
LG12.c.381.10	Both	-2818.07240520676	-2815.85169753652	12	381	10	390	12157	834014988	27492952	29768560	12166	834437182	27915146	30190754	422194	4.44141534047867	0.0350771565665348	27704049	834226085	29979657	cela1_red_10_29768560	cela1_red_10_30190754
LG12.c.381.10	Male	-884.666741209667	-881.274892058487	12	381	10	390	12157	834014988	27492952	29768560	12166	834437182	27915146	30190754	422194	6.78369830235852	0.009199408995192	27704049	834226085	29979657	cela1_red_10_29768560	cela1_red_10_30190754
LG12.c.381.10	Female	-1896.57006340105	-1896.21576056171	12	381	10	390	12157	834014988	27492952	29768560	12166	834437182	27915146	30190754	422194	0.708605678678396	0.399907081723692	27704049	834226085	29979657	cela1_red_10_29768560	cela1_red_10_30190754
LG12.c.382.10	Both	-2818.07212292648	-2815.95237842285	12	382	10	391	12158	834073348	27551312	29826920	12167	834600139	28078103	30353711	526791	4.23948900726737	0.0394940522162791	27814707.5	834336743.5	30090315.5	cela1_red_10_29826920	cela1_red_10_30353711
LG12.c.382.10	Male	-884.667458679156	-881.13783197332	12	382	10	391	12158	834073348	27551312	29826920	12167	834600139	28078103	30353711	526791	7.05925341167085	0.00788568541880486	27814707.5	834336743.5	30090315.5	cela1_red_10_29826920	cela1_red_10_30353711
LG12.c.382.10	Female	-1896.56889806517	-1896.3450585474	12	382	10	391	12158	834073348	27551312	29826920	12167	834600139	28078103	30353711	526791	0.447679035552483	0.503439209026953	27814707.5	834336743.5	30090315.5	cela1_red_10_29826920	cela1_red_10_30353711
LG12.c.383.10	Both	-2818.07251441499	-2816.29240356032	12	383	10	392	12159	834108532	27586496	29862104	12168	834666628	28144592	30420200	558096	3.56022170934375	0.0591798340277301	27865544	834387580	30141152	cela1_red_10_29862104	cela1_red_10_30420200
LG12.c.383.10	Male	-884.667432046885	-881.602968662756	12	383	10	392	12159	834108532	27586496	29862104	12168	834666628	28144592	30420200	558096	6.12892676825709	0.0132987575365422	27865544	834387580	30141152	cela1_red_10_29862104	cela1_red_10_30420200
LG12.c.383.10	Female	-1896.56998406758	-1896.26854878122	12	383	10	392	12159	834108532	27586496	29862104	12168	834666628	28144592	30420200	558096	0.602870572704887	0.437484863841069	27865544	834387580	30141152	cela1_red_10_29862104	cela1_red_10_30420200
LG12.c.384.10	Both	-2818.06537743456	-2817.37662728552	12	384	10	393	12160	834179543	27657507	29933115	12169	834857318	28335282	30610890	677775	1.37750029808831	0.240527396777285	27996394.5	834518430.5	30272002.5	cela1_red_10_29933115	cela1_red_10_30610890
LG12.c.384.10	Male	-884.66640470204	-882.087373021559	12	384	10	393	12160	834179543	27657507	29933115	12169	834857318	28335282	30610890	677775	5.15806336096307	0.0231386845881895	27996394.5	834518430.5	30272002.5	cela1_red_10_29933115	cela1_red_10_30610890
LG12.c.384.10	Female	-1896.56672883278	-1896.56672899208	12	384	10	393	12160	834179543	27657507	29933115	12169	834857318	28335282	30610890	677775	-3.18595539283706e-07	1	27996394.5	834518430.5	30272002.5	cela1_red_10_29933115	cela1_red_10_30610890
LG12.c.385.10	Both	-2818.0678966953	-2817.26955019258	12	385	10	394	12161	834198236	27676200	29951808	12170	834907981	28385945	30661553	709745	1.59669300544192	0.206372490374622	28031072.5	834553108.5	30306680.5	cela1_red_10_29951808	cela1_red_10_30661553
LG12.c.385.10	Male	-884.666087601292	-882.286780425719	12	385	10	394	12161	834198236	27676200	29951808	12170	834907981	28385945	30661553	709745	4.75861435114689	0.02915200770105	28031072.5	834553108.5	30306680.5	cela1_red_10_29951808	cela1_red_10_30661553
LG12.c.385.10	Female	-1896.56846389705	-1896.5146178554	12	385	10	394	12161	834198236	27676200	29951808	12170	834907981	28385945	30661553	709745	0.107692083299753	0.742787121586343	28031072.5	834553108.5	30306680.5	cela1_red_10_29951808	cela1_red_10_30661553
LG12.c.386.10	Both	-2818.07253305249	-2817.06927922521	12	386	10	395	12162	834230597	27708561	29984169	12171	834981606	28459570	30735178	751009	2.00650765455885	0.156625507819719	28084065.5	834606101.5	30359673.5	cela1_red_10_29984169	cela1_red_10_30735178
LG12.c.386.10	Male	-884.666686847245	-882.105266133372	12	386	10	395	12162	834230597	27708561	29984169	12171	834981606	28459570	30735178	751009	5.12284142774502	0.0236129221648195	28084065.5	834606101.5	30359673.5	cela1_red_10_29984169	cela1_red_10_30735178
LG12.c.386.10	Female	-1896.56974840739	-1896.4572155928	12	386	10	395	12162	834230597	27708561	29984169	12171	834981606	28459570	30735178	751009	0.225065629173969	0.635206976479155	28084065.5	834606101.5	30359673.5	cela1_red_10_29984169	cela1_red_10_30735178
LG12.c.387.10	Both	-2818.07122122959	-2817.32756860047	12	387	10	396	12163	834310279	27788243	30063851	12172	835164277	28642241	30917849	853998	1.48730525822702	0.22263503538441	28215242	834737278	30490850	cela1_red_10_30063851	cela1_red_10_30917849
LG12.c.387.10	Male	-884.666665280729	-882.146137257316	12	387	10	396	12163	834310279	27788243	30063851	12172	835164277	28642241	30917849	853998	5.0410560468265	0.0247533955180947	28215242	834737278	30490850	cela1_red_10_30063851	cela1_red_10_30917849
LG12.c.387.10	Female	-1896.56912916406	-1896.50276022018	12	387	10	396	12163	834310279	27788243	30063851	12172	835164277	28642241	30917849	853998	0.132737887764506	0.715610023414327	28215242	834737278	30490850	cela1_red_10_30063851	cela1_red_10_30917849
LG12.c.388.10	Both	-2818.07919339299	-2816.72095163007	12	388	10	397	12164	834338095	27816059	30091667	12173	835218332	28696296	30971904	880237	2.71648352583634	0.0993165976642308	28256177.5	834778213.5	30531785.5	cela1_red_10_30091667	cela1_red_10_30971904
LG12.c.388.10	Male	-884.666251632689	-881.923025082116	12	388	10	397	12164	834338095	27816059	30091667	12173	835218332	28696296	30971904	880237	5.4864531011458	0.0191643839745237	28256177.5	834778213.5	30531785.5	cela1_red_10_30091667	cela1_red_10_30971904
LG12.c.388.10	Female	-1896.57205110051	-1896.33000348444	12	388	10	397	12164	834338095	27816059	30091667	12173	835218332	28696296	30971904	880237	0.484095232154232	0.486573177092248	28256177.5	834778213.5	30531785.5	cela1_red_10_30091667	cela1_red_10_30971904
LG12.c.389.10	Both	-2818.07844431928	-2817.01029608085	12	389	10	398	12165	834378322	27856286	30131894	12174	835249446	28727410	31003018	871124	2.13629647686048	0.143848798651948	28291848	834813884	30567456	cela1_red_10_30131894	cela1_red_10_31003018
LG12.c.389.10	Male	-884.667773512293	-881.787989122134	12	389	10	398	12165	834378322	27856286	30131894	12174	835249446	28727410	31003018	871124	5.75956878031889	0.0163990960925794	28291848	834813884	30567456	cela1_red_10_30131894	cela1_red_10_31003018
LG12.c.389.10	Female	-1896.57080948935	-1896.44595458004	12	389	10	398	12165	834378322	27856286	30131894	12174	835249446	28727410	31003018	871124	0.249709818618612	0.617279477212942	28291848	834813884	30567456	cela1_red_10_30131894	cela1_red_10_31003018
LG12.c.390.10	Both	-2818.07643064714	-2817.14690123883	12	390	10	399	12166	834437182	27915146	30190754	12175	835293948	28771912	31047520	856766	1.85905881661802	0.172733465622693	28343529	834865565	30619137	cela1_red_10_30190754	cela1_red_10_31047520
LG12.c.390.10	Male	-884.666186367173	-882.666175603996	12	390	10	399	12166	834437182	27915146	30190754	12175	835293948	28771912	31047520	856766	4.00002152635466	0.0454996827859208	28343529	834865565	30619137	cela1_red_10_30190754	cela1_red_10_31047520
LG12.c.390.10	Female	-1896.57053455333	-1896.45880206391	12	390	10	399	12166	834437182	27915146	30190754	12175	835293948	28771912	31047520	856766	0.223464978831544	0.636412366821008	28343529	834865565	30619137	cela1_red_10_30190754	cela1_red_10_31047520
LG12.c.391.10	Both	-2818.07469076688	-2817.0923965684	12	391	10	400	12167	834600139	28078103	30353711	12176	835377835	28855799	31131407	777696	1.96458839696788	0.161023446615848	28466951	834988987	30742559	cela1_red_10_30353711	cela1_red_10_31131407
LG12.c.391.10	Male	-884.665212121918	-882.927838309358	12	391	10	400	12167	834600139	28078103	30353711	12176	835377835	28855799	31131407	777696	3.47474762511956	0.0623122265764721	28466951	834988987	30742559	cela1_red_10_30353711	cela1_red_10_31131407
LG12.c.391.10	Female	-1896.5705008702	-1896.45229897441	12	391	10	400	12167	834600139	28078103	30353711	12176	835377835	28855799	31131407	777696	0.236403791581324	0.626815637418547	28466951	834988987	30742559	cela1_red_10_30353711	cela1_red_10_31131407
LG12.c.392.10	Both	-2818.0712864286	-2817.1742635554	12	392	10	401	12168	834666628	28144592	30420200	12177	835418864	28896828	31172436	752236	1.79404574639284	0.18043400515492	28520710	835042746	30796318	cela1_red_10_30420200	cela1_red_10_31172436
LG12.c.392.10	Male	-884.663499874429	-883.732155958781	12	392	10	401	12168	834666628	28144592	30420200	12177	835418864	28896828	31172436	752236	1.86268783129549	0.172314906268157	28520710	835042746	30796318	cela1_red_10_30420200	cela1_red_10_31172436
LG12.c.392.10	Female	-1896.57074284279	-1896.40118403702	12	392	10	401	12168	834666628	28144592	30420200	12177	835418864	28896828	31172436	752236	0.339117611536039	0.560338996580805	28520710	835042746	30796318	cela1_red_10_30420200	cela1_red_10_31172436
LG12.c.393.10	Both	-2818.07071815799	-2817.13844488691	12	393	10	402	12169	834857318	28335282	30610890	12178	835469777	28947741	31223349	612459	1.86454654214776	0.172100979927391	28641511.5	835163547.5	30917119.5	cela1_red_10_30610890	cela1_red_10_31223349
LG12.c.393.10	Male	-884.663856149171	-883.66752713697	12	393	10	402	12169	834857318	28335282	30610890	12178	835469777	28947741	31223349	612459	1.99265802440209	0.158063236815264	28641511.5	835163547.5	30917119.5	cela1_red_10_30610890	cela1_red_10_31223349
LG12.c.393.10	Female	-1896.56950026234	-1896.45897624871	12	393	10	402	12169	834857318	28335282	30610890	12178	835469777	28947741	31223349	612459	0.221048027258803	0.638242531876739	28641511.5	835163547.5	30917119.5	cela1_red_10_30610890	cela1_red_10_31223349
LG12.c.394.10	Both	-2818.06827947403	-2817.28930527753	12	394	10	403	12170	834907981	28385945	30661553	12179	835549102	29027066	31302674	641121	1.55794839299233	0.211965867977427	28706505.5	835228541.5	30982113.5	cela1_red_10_30661553	cela1_red_10_31302674
LG12.c.394.10	Male	-884.663680012158	-883.790653494442	12	394	10	403	12170	834907981	28385945	30661553	12179	835549102	29027066	31302674	641121	1.74605303543376	0.186373691148205	28706505.5	835228541.5	30982113.5	cela1_red_10_30661553	cela1_red_10_31302674
LG12.c.394.10	Female	-1896.56795111248	-1896.53741980116	12	394	10	403	12170	834907981	28385945	30661553	12179	835549102	29027066	31302674	641121	0.0610626226334716	0.804824237068376	28706505.5	835228541.5	30982113.5	cela1_red_10_30661553	cela1_red_10_31302674
LG12.c.395.10	Both	-2818.06819268002	-2817.18418703004	12	395	10	404	12171	834981606	28459570	30735178	12180	835608514	29086478	31362086	626908	1.76801129995329	0.183628387934737	28773024	835295060	31048632	cela1_red_10_30735178	cela1_red_10_31362086
LG12.c.395.10	Male	-884.663809429139	-883.748475595076	12	395	10	404	12171	834981606	28459570	30735178	12180	835608514	29086478	31362086	626908	1.83066766812658	0.176048704212419	28773024	835295060	31048632	cela1_red_10_30735178	cela1_red_10_31362086
LG12.c.395.10	Female	-1896.56706779583	-1896.56243016469	12	395	10	404	12171	834981606	28459570	30735178	12180	835608514	29086478	31362086	626908	0.00927526227906128	0.923275828012763	28773024	835295060	31048632	cela1_red_10_30735178	cela1_red_10_31362086
LG12.c.396.10	Both	-2818.06388948185	-2817.3757785772	12	396	10	405	12172	835164277	28642241	30917849	12181	835639232	29117196	31392804	474955	1.37622180929702	0.240745760446761	28879718.5	835401754.5	31155326.5	cela1_red_10_30917849	cela1_red_10_31392804
LG12.c.396.10	Male	-884.663585828638	-883.691976103912	12	396	10	405	12172	835164277	28642241	30917849	12181	835639232	29117196	31392804	474955	1.94321944945091	0.163319397289097	28879718.5	835401754.5	31155326.5	cela1_red_10_30917849	cela1_red_10_31392804
LG12.c.396.10	Female	-1896.56575180833	-1896.56575403355	12	396	10	405	12172	835164277	28642241	30917849	12181	835639232	29117196	31392804	474955	-4.45045452579507e-06	1	28879718.5	835401754.5	31155326.5	cela1_red_10_30917849	cela1_red_10_31392804
LG12.c.397.10	Both	-2818.06693675097	-2817.29539183175	12	397	10	406	12173	835218332	28696296	30971904	12182	835806465	29284429	31560037	588133	1.54308983844658	0.214158474247505	28990362.5	835512398.5	31265970.5	cela1_red_10_30971904	cela1_red_10_31560037
LG12.c.397.10	Male	-884.664739636548	-883.329493455949	12	397	10	406	12173	835218332	28696296	30971904	12182	835806465	29284429	31560037	588133	2.67049236119828	0.102224394843433	28990362.5	835512398.5	31265970.5	cela1_red_10_30971904	cela1_red_10_31560037
LG12.c.397.10	Female	-1896.5660822864	-1896.5660842638	12	397	10	406	12173	835218332	28696296	30971904	12182	835806465	29284429	31560037	588133	-3.95480401493842e-06	1	28990362.5	835512398.5	31265970.5	cela1_red_10_30971904	cela1_red_10_31560037
LG12.c.398.10	Both	-2818.05624326499	-2818.0556612818	12	398	10	407	12174	835249446	28727410	31003018	12183	836012199	29490163	31765771	762753	0.00116396636713034	0.972783891157876	29108786.5	835630822.5	31384394.5	cela1_red_10_31003018	cela1_red_10_31765771
LG12.c.398.10	Male	-884.663653711819	-883.752635273463	12	398	10	407	12174	835249446	28727410	31003018	12183	836012199	29490163	31765771	762753	1.82203687671154	0.177071012930045	29108786.5	835630822.5	31384394.5	cela1_red_10_31003018	cela1_red_10_31765771
LG12.c.398.10	Female	-1896.56305867583	-1896.56306432696	12	398	10	407	12174	835249446	28727410	31003018	12183	836012199	29490163	31765771	762753	-1.13022488221759e-05	1	29108786.5	835630822.5	31384394.5	cela1_red_10_31003018	cela1_red_10_31765771
LG12.c.399.10	Both	-2818.05692364731	-2818.05099672013	12	399	10	408	12175	835293948	28771912	31047520	12184	836038815	29516779	31792387	744867	0.0118538543674731	0.913301312608229	29144345.5	835666381.5	31419953.5	cela1_red_10_31047520	cela1_red_10_31792387
LG12.c.399.10	Male	-884.662203189201	-884.359678337283	12	399	10	408	12175	835293948	28771912	31047520	12184	836038815	29516779	31792387	744867	0.60504970383522	0.436657795714368	29144345.5	835666381.5	31419953.5	cela1_red_10_31047520	cela1_red_10_31792387
LG12.c.399.10	Female	-1896.56384712225	-1896.56385194079	12	399	10	408	12175	835293948	28771912	31047520	12184	836038815	29516779	31792387	744867	-9.63706588663626e-06	1	29144345.5	835666381.5	31419953.5	cela1_red_10_31047520	cela1_red_10_31792387
LG12.c.400.10	Both	-2818.056760268	-2818.05641607446	12	400	10	409	12176	835377835	28855799	31131407	12185	836060104	29538068	31813676	682269	0.000688387091940967	0.979068199070678	29196933.5	835718969.5	31472541.5	cela1_red_10_31131407	cela1_red_10_31813676
LG12.c.400.10	Male	-884.662379435553	-884.358980909885	12	400	10	409	12176	835377835	28855799	31131407	12185	836060104	29538068	31813676	682269	0.606797051335434	0.435996331921058	29196933.5	835718969.5	31472541.5	cela1_red_10_31131407	cela1_red_10_31813676
LG12.c.400.10	Female	-1896.56530086956	-1896.56530373137	12	400	10	409	12176	835377835	28855799	31131407	12185	836060104	29538068	31813676	682269	-5.72362296225037e-06	1	29196933.5	835718969.5	31472541.5	cela1_red_10_31131407	cela1_red_10_31813676
LG12.c.401.10	Both	-2818.05735401165	-2818.05454313265	12	401	10	410	12177	835418864	28896828	31172436	12186	836134359	29612323	31887931	715495	0.00562175799768738	0.940231910910669	29254575.5	835776611.5	31530183.5	cela1_red_10_31172436	cela1_red_10_31887931
LG12.c.401.10	Male	-884.662151914579	-884.490156536865	12	401	10	410	12177	835418864	28896828	31172436	12186	836134359	29612323	31887931	715495	0.343990755427285	0.557534690284246	29254575.5	835776611.5	31530183.5	cela1_red_10_31172436	cela1_red_10_31887931
LG12.c.401.10	Female	-1896.56602083033	-1896.56602282668	12	401	10	410	12177	835418864	28896828	31172436	12186	836134359	29612323	31887931	715495	-3.99269947592984e-06	1	29254575.5	835776611.5	31530183.5	cela1_red_10_31172436	cela1_red_10_31887931
LG12.c.241.20	Both	-2818.06452991108	-2816.77671975702	12	241	20	260	12017	823245831	16723795	16424253	12036	825146627	18624591	18325049	1900796	2.57562030811368	0.108521553446025	17674193	824196229	17374651	cela1_red_10_16424253	cela1_red_10_18325049
LG12.c.241.20	Male	-884.665069054973	-884.291926416952	12	241	20	260	12017	823245831	16723795	16424253	12036	825146627	18624591	18325049	1900796	0.746285276042499	0.387654888920887	17674193	824196229	17374651	cela1_red_10_16424253	cela1_red_10_18325049
LG12.c.241.20	Female	-1896.57197901231	-1895.21914899765	12	241	20	260	12017	823245831	16723795	16424253	12036	825146627	18624591	18325049	1900796	2.7056600293181	0.0999926907901389	17674193	824196229	17374651	cela1_red_10_16424253	cela1_red_10_18325049
LG12.c.242.20	Both	-2818.0653300317	-2816.76269593687	12	242	20	261	12018	823314234	16792198	16492656	12037	825167634	18645598	18346056	1853400	2.60526818965354	0.106509138146043	17718898	824240934	17419356	cela1_red_10_16492656	cela1_red_10_18346056
LG12.c.242.20	Male	-884.664829022041	-884.292073170628	12	242	20	261	12018	823314234	16792198	16492656	12037	825167634	18645598	18346056	1853400	0.745511702825297	0.387900983389699	17718898	824240934	17419356	cela1_red_10_16492656	cela1_red_10_18346056
LG12.c.242.20	Female	-1896.57303680098	-1895.04639307367	12	242	20	261	12018	823314234	16792198	16492656	12037	825167634	18645598	18346056	1853400	3.05328745461748	0.0805738952319718	17718898	824240934	17419356	cela1_red_10_16492656	cela1_red_10_18346056
LG12.c.243.20	Both	-2818.06259901673	-2817.33126501657	12	243	20	262	12019	823383174	16861138	16561596	12038	825198923	18676887	18377345	1815749	1.46266800030935	0.226506090663861	17769012.5	824291048.5	17469470.5	cela1_red_10_16561596	cela1_red_10_18377345
LG12.c.243.20	Male	-884.664872079109	-884.290144661516	12	243	20	262	12019	823383174	16861138	16561596	12038	825198923	18676887	18377345	1815749	0.749454835186043	0.386648888076689	17769012.5	824291048.5	17469470.5	cela1_red_10_16561596	cela1_red_10_18377345
LG12.c.243.20	Female	-1896.57040101229	-1895.73708374398	12	243	20	262	12019	823383174	16861138	16561596	12038	825198923	18676887	18377345	1815749	1.66663453663477	0.196709917553942	17769012.5	824291048.5	17469470.5	cela1_red_10_16561596	cela1_red_10_18377345
LG12.c.244.20	Both	-2818.05919050721	-2817.89308391239	12	244	20	263	12020	823499653	16977617	16678075	12039	825290045	18768009	18468467	1790392	0.332213189642971	0.564358778804851	17872813	824394849	17573271	cela1_red_10_16678075	cela1_red_10_18468467
LG12.c.244.20	Male	-884.664528627484	-884.363836124213	12	244	20	263	12020	823499653	16977617	16678075	12039	825290045	18768009	18468467	1790392	0.601385006542614	0.438050070755719	17872813	824394849	17573271	cela1_red_10_16678075	cela1_red_10_18468467
LG12.c.244.20	Female	-1896.56954520561	-1896.17462608235	12	244	20	263	12020	823499653	16977617	16678075	12039	825290045	18768009	18468467	1790392	0.78983824652596	0.374149040673562	17872813	824394849	17573271	cela1_red_10_16678075	cela1_red_10_18468467
LG12.c.245.20	Both	-2818.06045032826	-2817.86506608753	12	245	20	264	12021	823565535	17043499	16743957	12040	825354377	18832341	18532799	1788842	0.390768481469422	0.531895731687275	17937920	824459956	17638378	cela1_red_10_16743957	cela1_red_10_18532799
LG12.c.245.20	Male	-884.66433632194	-884.398526998017	12	245	20	264	12021	823565535	17043499	16743957	12040	825354377	18832341	18532799	1788842	0.531618647846699	0.465927140231655	17937920	824459956	17638378	cela1_red_10_16743957	cela1_red_10_18532799
LG12.c.245.20	Female	-1896.57030253782	-1896.14613082332	12	245	20	264	12021	823565535	17043499	16743957	12040	825354377	18832341	18532799	1788842	0.848343428989665	0.357021396430408	17937920	824459956	17638378	cela1_red_10_16743957	cela1_red_10_18532799
LG12.c.246.20	Both	-2818.05704190425	-2818.02316789879	12	246	20	265	12022	823654578	17132542	16833000	12041	825502708	18980672	18681130	1848130	0.0677480109116004	0.794644342737784	18056607	824578643	17757065	cela1_red_10_16833000	cela1_red_10_18681130
LG12.c.246.20	Male	-884.664347872213	-884.407835724041	12	246	20	265	12022	823654578	17132542	16833000	12041	825502708	18980672	18681130	1848130	0.513024296343929	0.47383258395654	18056607	824578643	17757065	cela1_red_10_16833000	cela1_red_10_18681130
LG12.c.246.20	Female	-1896.56794111607	-1896.2729591941	12	246	20	265	12022	823654578	17132542	16833000	12041	825502708	18980672	18681130	1848130	0.589963843958685	0.442433100374606	18056607	824578643	17757065	cela1_red_10_16833000	cela1_red_10_18681130
LG12.c.247.20	Both	-2818.05714812311	-2817.99846815368	12	247	20	266	12023	823722824	17200788	16901246	12042	825535388	19013352	18713810	1812564	0.117359938848494	0.73191567749514	18107070	824629106	17807528	cela1_red_10_16901246	cela1_red_10_18713810
LG12.c.247.20	Male	-884.665590791212	-884.238875744241	12	247	20	266	12023	823722824	17200788	16901246	12042	825535388	19013352	18713810	1812564	0.853430093942734	0.355583788434493	18107070	824629106	17807528	cela1_red_10_16901246	cela1_red_10_18713810
LG12.c.247.20	Female	-1896.56860928412	-1896.02636899267	12	247	20	266	12023	823722824	17200788	16901246	12042	825535388	19013352	18713810	1812564	1.08448058289559	0.297697376996367	18107070	824629106	17807528	cela1_red_10_16901246	cela1_red_10_18713810
LG12.c.248.20	Both	-2818.05057864085	-2818.05058350943	12	248	20	267	12024	823745758	17223722	16924180	12043	825537815	19015779	18716237	1792057	-9.73717578744981e-06	1	18119750.5	824641786.5	17820208.5	cela1_red_10_16924180	cela1_red_10_18716237
LG12.c.248.20	Male	-884.665467258872	-884.234088723066	12	248	20	267	12024	823745758	17223722	16924180	12043	825537815	19015779	18716237	1792057	0.862757071612123	0.352968293182335	18119750.5	824641786.5	17820208.5	cela1_red_10_16924180	cela1_red_10_18716237
LG12.c.248.20	Female	-1896.56241973891	-1896.56242447853	12	248	20	267	12024	823745758	17223722	16924180	12043	825537815	19015779	18716237	1792057	-9.47924945648992e-06	1	18119750.5	824641786.5	17820208.5	cela1_red_10_16924180	cela1_red_10_18716237
LG12.c.249.20	Both	-2818.05313022542	-2818.05313273609	12	249	20	268	12025	823783238	17261202	16961660	12044	825573774	19051738	18752196	1790536	-5.02133298141416e-06	1	18156470	824678506	17856928	cela1_red_10_16961660	cela1_red_10_18752196
LG12.c.249.20	Male	-884.665793290641	-884.209214853192	12	249	20	268	12025	823783238	17261202	16961660	12044	825573774	19051738	18752196	1790536	0.91315687489714	0.339278192114848	18156470	824678506	17856928	cela1_red_10_16961660	cela1_red_10_18752196
LG12.c.249.20	Female	-1896.56324739039	-1896.56325123056	12	249	20	268	12025	823783238	17261202	16961660	12044	825573774	19051738	18752196	1790536	-7.68032987252809e-06	1	18156470	824678506	17856928	cela1_red_10_16961660	cela1_red_10_18752196
LG12.c.250.20	Both	-2818.05688647671	-2818.05380226605	12	250	20	269	12026	823800695	17278659	16979117	12045	825600940	19078904	18779362	1800245	0.00616842131421436	0.937399071547387	18178781.5	824700817.5	17879239.5	cela1_red_10_16979117	cela1_red_10_18779362
LG12.c.250.20	Male	-884.666108687089	-884.166711499326	12	250	20	269	12026	823800695	17278659	16979117	12045	825600940	19078904	18779362	1800245	0.998794375526131	0.317602409652335	18178781.5	824700817.5	17879239.5	cela1_red_10_16979117	cela1_red_10_18779362
LG12.c.250.20	Female	-1896.56503235044	-1896.56503999732	12	250	20	269	12026	823800695	17278659	16979117	12045	825600940	19078904	18779362	1800245	-1.52937509483309e-05	1	18178781.5	824700817.5	17879239.5	cela1_red_10_16979117	cela1_red_10_18779362
LG12.c.251.20	Both	-2818.05877786228	-2818.04037305132	12	251	20	270	12027	823992526	17470490	17170948	12046	825641365	19119329	18819787	1648839	0.0368096219381187	0.847853172412531	18294909.5	824816945.5	17995367.5	cela1_red_10_17170948	cela1_red_10_18819787
LG12.c.251.20	Male	-884.666006267615	-884.181139990731	12	251	20	270	12027	823992526	17470490	17170948	12046	825641365	19119329	18819787	1648839	0.969732553767926	0.324746888267936	18294909.5	824816945.5	17995367.5	cela1_red_10_17170948	cela1_red_10_18819787
LG12.c.251.20	Female	-1896.5655198483	-1896.56552637457	12	251	20	270	12027	823992526	17470490	17170948	12046	825641365	19119329	18819787	1648839	-1.30525372696866e-05	1	18294909.5	824816945.5	17995367.5	cela1_red_10_17170948	cela1_red_10_18819787
LG12.c.252.20	Both	-2818.05883439253	-2818.04120254488	12	252	20	271	12028	824141220	17619184	17319642	12047	825692791	19170755	18871213	1551571	0.035263695298454	0.851044173993241	18394969.5	824917005.5	18095427.5	cela1_red_10_17319642	cela1_red_10_18871213
LG12.c.252.20	Male	-884.665561484139	-884.237427219646	12	252	20	271	12028	824141220	17619184	17319642	12047	825692791	19170755	18871213	1551571	0.856268528984856	0.354785028368034	18394969.5	824917005.5	18095427.5	cela1_red_10_17319642	cela1_red_10_18871213
LG12.c.252.20	Female	-1896.56547506052	-1896.56548109748	12	252	20	271	12028	824141220	17619184	17319642	12047	825692791	19170755	18871213	1551571	-1.20739182420948e-05	1	18394969.5	824917005.5	18095427.5	cela1_red_10_17319642	cela1_red_10_18871213
LG12.c.253.20	Both	-2818.05731980993	-2818.05061324761	12	253	20	272	12029	824338234	17816198	17516656	12048	825736758	19214722	18915180	1398524	0.013413124633189	0.907799126621748	18515460	825037496	18215918	cela1_red_10_17516656	cela1_red_10_18915180
LG12.c.253.20	Male	-884.66556758235	-884.24184592539	12	253	20	272	12029	824338234	17816198	17516656	12048	825736758	19214722	18915180	1398524	0.847443313920166	0.357276619424827	18515460	825037496	18215918	cela1_red_10_17516656	cela1_red_10_18915180
LG12.c.253.20	Female	-1896.56585285197	-1896.56585528811	12	253	20	272	12029	824338234	17816198	17516656	12048	825736758	19214722	18915180	1398524	-4.87227498524589e-06	1	18515460	825037496	18215918	cela1_red_10_17516656	cela1_red_10_18915180
LG12.c.254.20	Both	-2818.06128645343	-2817.86550346081	12	254	20	273	12030	824367973	17845937	17546395	12049	825921011	19398975	19099433	1553038	0.39156598523823	0.531477399998044	18622456	825144492	18322914	cela1_red_10_17546395	cela1_red_10_19099433
LG12.c.254.20	Male	-884.665659633572	-884.154452274164	12	254	20	273	12030	824367973	17845937	17546395	12049	825921011	19398975	19099433	1553038	1.02241471881712	0.311946915062038	18622456	825144492	18322914	cela1_red_10_17546395	cela1_red_10_19099433
LG12.c.254.20	Female	-1896.56756420916	-1896.36877494273	12	254	20	273	12030	824367973	17845937	17546395	12049	825921011	19398975	19099433	1553038	0.397578532853004	0.528342460332635	18622456	825144492	18322914	cela1_red_10_17546395	cela1_red_10_19099433
LG12.c.255.20	Both	-2818.06257753507	-2817.80701329678	12	255	20	274	12031	824524667	18002631	17703089	12050	826017428	19495392	19195850	1492761	0.511128476582599	0.474650754855439	18749011.5	825271047.5	18449469.5	cela1_red_10_17703089	cela1_red_10_19195850
LG12.c.255.20	Male	-884.664949091969	-884.150968660968	12	255	20	274	12031	824524667	18002631	17703089	12050	826017428	19495392	19195850	1492761	1.02796086200101	0.310638084165883	18749011.5	825271047.5	18449469.5	cela1_red_10_17703089	cela1_red_10_19195850
LG12.c.255.20	Female	-1896.56790381633	-1896.41994153491	12	255	20	274	12031	824524667	18002631	17703089	12050	826017428	19495392	19195850	1492761	0.295924562843538	0.58644870675571	18749011.5	825271047.5	18449469.5	cela1_red_10_17703089	cela1_red_10_19195850
LG12.c.256.20	Both	-2818.06376669639	-2817.78175230844	12	256	20	275	12032	824753022	18230986	17931444	12051	826034419	19512383	19212841	1281397	0.564028775910629	0.452641526717981	18871684.5	825393720.5	18572142.5	cela1_red_10_17931444	cela1_red_10_19212841
LG12.c.256.20	Male	-884.665333161642	-884.05890066874	12	256	20	275	12032	824753022	18230986	17931444	12051	826034419	19512383	19212841	1281397	1.21286498580412	0.270765460164176	18871684.5	825393720.5	18572142.5	cela1_red_10_17931444	cela1_red_10_19212841
LG12.c.256.20	Female	-1896.56810213441	-1896.42429740307	12	256	20	275	12032	824753022	18230986	17931444	12051	826034419	19512383	19212841	1281397	0.287609462681303	0.591756531018192	18871684.5	825393720.5	18572142.5	cela1_red_10_17931444	cela1_red_10_19212841
LG12.c.257.20	Both	-2818.06324037373	-2817.82438710333	12	257	20	276	12033	824841684	18319648	18020106	12052	826089471	19567435	19267893	1247787	0.477706540792497	0.48946300001717	18943541.5	825465577.5	18643999.5	cela1_red_10_18020106	cela1_red_10_19267893
LG12.c.257.20	Male	-884.664847553037	-884.027965623505	12	257	20	276	12033	824841684	18319648	18020106	12052	826089471	19567435	19267893	1247787	1.27376385906518	0.259061768307336	18943541.5	825465577.5	18643999.5	cela1_red_10_18020106	cela1_red_10_19267893
LG12.c.257.20	Female	-1896.5678917883	-1896.46137441981	12	257	20	276	12033	824841684	18319648	18020106	12052	826089471	19567435	19267893	1247787	0.213034736997997	0.644399135583237	18943541.5	825465577.5	18643999.5	cela1_red_10_18020106	cela1_red_10_19267893
LG12.c.258.20	Both	-2818.06652125167	-2817.6691953153	12	258	20	277	12034	824963435	18441399	18141857	12053	826184774	19662738	19363196	1221339	0.794651872743088	0.372697197518195	19052068.5	825574104.5	18752526.5	cela1_red_10_18141857	cela1_red_10_19363196
LG12.c.258.20	Male	-884.664619421037	-884.072749189638	12	258	20	277	12034	824963435	18441399	18141857	12053	826184774	19662738	19363196	1221339	1.1837404627986	0.276595825154688	19052068.5	825574104.5	18752526.5	cela1_red_10_18141857	cela1_red_10_19363196
LG12.c.258.20	Female	-1896.57003641248	-1896.33038222351	12	258	20	277	12034	824963435	18441399	18141857	12053	826184774	19662738	19363196	1221339	0.479308377936377	0.488735760102305	19052068.5	825574104.5	18752526.5	cela1_red_10_18141857	cela1_red_10_19363196
LG12.c.259.20	Both	-2818.07959766458	-2816.70448973213	12	259	20	278	12035	825009010	18486974	18187432	12054	826207323	19685287	19385745	1198313	2.75021586489584	0.0972412992206944	19086130.5	825608166.5	18786588.5	cela1_red_10_18187432	cela1_red_10_19385745
LG12.c.259.20	Male	-884.664817275764	-883.815832569847	12	259	20	278	12035	825009010	18486974	18187432	12054	826207323	19685287	19385745	1198313	1.69796941183517	0.192553747995184	19086130.5	825608166.5	18786588.5	cela1_red_10_18187432	cela1_red_10_19385745
LG12.c.259.20	Female	-1896.57697213096	-1895.6252706637	12	259	20	278	12035	825009010	18486974	18187432	12054	826207323	19685287	19385745	1198313	1.90340293451891	0.167697916492015	19086130.5	825608166.5	18786588.5	cela1_red_10_18187432	cela1_red_10_19385745
LG12.c.260.20	Both	-2818.07761046924	-2816.70007210164	12	260	20	279	12036	825146627	18624591	18325049	12055	826347441	19825405	19525863	1200814	2.7550767351986	0.0969461649980933	19224998	825747034	18925456	cela1_red_10_18325049	cela1_red_10_19525863
LG12.c.260.20	Male	-884.664207738729	-883.64268257572	12	260	20	279	12036	825146627	18624591	18325049	12055	826347441	19825405	19525863	1200814	2.04305032601883	0.152902766977002	19224998	825747034	18925456	cela1_red_10_18325049	cela1_red_10_19525863
LG12.c.260.20	Female	-1896.57619959427	-1895.64317844652	12	260	20	279	12036	825146627	18624591	18325049	12055	826347441	19825405	19525863	1200814	1.8660422954913	0.171929049459193	19224998	825747034	18925456	cela1_red_10_18325049	cela1_red_10_19525863
LG12.c.261.20	Both	-2818.07631531502	-2816.86247272307	12	261	20	280	12037	825167634	18645598	18346056	12056	826380700	19858664	19559122	1213066	2.42768518389039	0.119208816532749	19252131	825774167	18952589	cela1_red_10_18346056	cela1_red_10_19559122
LG12.c.261.20	Male	-884.663759763986	-883.849978726591	12	261	20	280	12037	825167634	18645598	18346056	12056	826380700	19858664	19559122	1213066	1.62756207479015	0.202040579713708	19252131	825774167	18952589	cela1_red_10_18346056	cela1_red_10_19559122
LG12.c.261.20	Female	-1896.57564802452	-1895.8218416678	12	261	20	280	12037	825167634	18645598	18346056	12056	826380700	19858664	19559122	1213066	1.50761271344072	0.219503726804758	19252131	825774167	18952589	cela1_red_10_18346056	cela1_red_10_19559122
LG12.c.262.20	Both	-2818.07550537747	-2816.77715257535	12	262	20	281	12038	825198923	18676887	18377345	12057	826439273	19917237	19617695	1240350	2.59670560422637	0.107086103196204	19297062	825819098	18997520	cela1_red_10_18377345	cela1_red_10_19617695
LG12.c.262.20	Male	-884.663754601262	-883.755599997361	12	262	20	281	12038	825198923	18676887	18377345	12057	826439273	19917237	19617695	1240350	1.81630920780208	0.177753230664081	19297062	825819098	18997520	cela1_red_10_18377345	cela1_red_10_19617695
LG12.c.262.20	Female	-1896.5745179459	-1895.83038939859	12	262	20	281	12038	825198923	18676887	18377345	12057	826439273	19917237	19617695	1240350	1.48825709461971	0.222487078465384	19297062	825819098	18997520	cela1_red_10_18377345	cela1_red_10_19617695
LG12.c.263.20	Both	-2818.09544173937	-2813.17452841736	12	263	20	282	12039	825290045	18768009	18468467	12058	826519623	19997587	19698045	1229578	9.84182664402579	0.00170588017324558	19382798	825904834	19083256	cela1_red_10_18468467	cela1_red_10_19698045
LG12.c.263.20	Male	-884.665221275147	-883.218736099944	12	263	20	282	12039	825290045	18768009	18468467	12058	826519623	19997587	19698045	1229578	2.89297035040772	0.0889667609899647	19382798	825904834	19083256	cela1_red_10_18468467	cela1_red_10_19698045
LG12.c.263.20	Female	-1896.58289797354	-1892.90568642505	12	263	20	282	12039	825290045	18768009	18468467	12058	826519623	19997587	19698045	1229578	7.35442309698328	0.00668979720194085	19382798	825904834	19083256	cela1_red_10_18468467	cela1_red_10_19698045
LG12.c.264.20	Both	-2818.10447814938	-2810.12511578723	12	264	20	283	12040	825354377	18832341	18532799	12059	826583942	20061906	19762364	1229565	15.9587247242889	6.47387061886162e-05	19447123.5	825969159.5	19147581.5	cela1_red_10_18532799	cela1_red_10_19762364
LG12.c.264.20	Male	-884.664642052874	-883.269601732481	12	264	20	283	12040	825354377	18832341	18532799	12059	826583942	20061906	19762364	1229565	2.79008064078494	0.0948494542493712	19447123.5	825969159.5	19147581.5	cela1_red_10_18532799	cela1_red_10_19762364
LG12.c.264.20	Female	-1896.58836252849	-1890.05201195007	12	264	20	283	12040	825354377	18832341	18532799	12059	826583942	20061906	19762364	1229565	13.0727011568242	0.00029963072761563	19447123.5	825969159.5	19147581.5	cela1_red_10_18532799	cela1_red_10_19762364
LG12.c.265.20	Both	-2818.10614009376	-2809.00058361852	12	265	20	284	12041	825502708	18980672	18681130	12060	826649623	20127587	19828045	1146915	18.2111129504829	1.9772178572186e-05	19554129.5	826076165.5	19254587.5	cela1_red_10_18681130	cela1_red_10_19828045
LG12.c.265.20	Male	-884.664433627651	-883.286805675126	12	265	20	284	12041	825502708	18980672	18681130	12060	826649623	20127587	19828045	1146915	2.75525590504935	0.096935305135686	19554129.5	826076165.5	19254587.5	cela1_red_10_18681130	cela1_red_10_19828045
LG12.c.265.20	Female	-1896.59047605597	-1889.32626300931	12	265	20	284	12041	825502708	18980672	18681130	12060	826649623	20127587	19828045	1146915	14.5284260933327	0.000138060538029894	19554129.5	826076165.5	19254587.5	cela1_red_10_18681130	cela1_red_10_19828045
LG12.c.266.20	Both	-2818.11170952496	-2808.6000337122	12	266	20	285	12042	825535388	19013352	18713810	12061	826673841	20151805	19852263	1138453	19.0233516255121	1.29128491533903e-05	19582578.5	826104614.5	19283036.5	cela1_red_10_18713810	cela1_red_10_19852263
LG12.c.266.20	Male	-884.664612350618	-883.179318633255	12	266	20	285	12042	825535388	19013352	18713810	12061	826673841	20151805	19852263	1138453	2.97058743472599	0.0847910594985533	19582578.5	826104614.5	19283036.5	cela1_red_10_18713810	cela1_red_10_19852263
LG12.c.266.20	Female	-1896.59371246902	-1888.62658357856	12	266	20	285	12042	825535388	19013352	18713810	12061	826673841	20151805	19852263	1138453	15.9342577809221	6.55809226284276e-05	19582578.5	826104614.5	19283036.5	cela1_red_10_18713810	cela1_red_10_19852263
LG12.c.267.20	Both	-2818.11347744054	-2808.22884098154	12	267	20	286	12043	825537815	19015779	18716237	12062	826833739	20311703	20012161	1295924	19.7692729179998	8.73761313646693e-06	19663741	826185777	19364199	cela1_red_10_18716237	cela1_red_10_20012161
LG12.c.267.20	Male	-884.663394518262	-884.16872636706	12	267	20	286	12043	825537815	19015779	18716237	12062	826833739	20311703	20012161	1295924	0.989336302404354	0.319904642093694	19663741	826185777	19364199	cela1_red_10_18716237	cela1_red_10_20012161
LG12.c.267.20	Female	-1896.59463772846	-1887.93236333957	12	267	20	286	12043	825537815	19015779	18716237	12062	826833739	20311703	20012161	1295924	17.324548777789	3.15089971317795e-05	19663741	826185777	19364199	cela1_red_10_18716237	cela1_red_10_20012161
LG12.c.268.20	Both	-2818.12080473543	-2807.83040903603	12	268	20	287	12044	825573774	19051738	18752196	12063	826892097	20370061	20070519	1318323	20.5807913988137	5.71668403126502e-06	19710899.5	826232935.5	19411357.5	cela1_red_10_18752196	cela1_red_10_20070519
LG12.c.268.20	Male	-884.663689372329	-884.054540674844	12	268	20	287	12044	825573774	19051738	18752196	12063	826892097	20370061	20070519	1318323	1.21829739497025	0.269695047900683	19710899.5	826232935.5	19411357.5	cela1_red_10_18752196	cela1_red_10_20070519
LG12.c.268.20	Female	-1896.598403942	-1887.45750481491	12	268	20	287	12044	825573774	19051738	18752196	12063	826892097	20370061	20070519	1318323	18.2817982541937	1.90518880008872e-05	19710899.5	826232935.5	19411357.5	cela1_red_10_18752196	cela1_red_10_20070519
LG12.c.269.20	Both	-2818.1209048064	-2808.09020376112	12	269	20	288	12045	825600940	19078904	18779362	12064	826911513	20389477	20089935	1310573	20.0614020905496	7.4995059509142e-06	19734190.5	826256226.5	19434648.5	cela1_red_10_18779362	cela1_red_10_20089935
LG12.c.269.20	Male	-884.663436949513	-884.106085726377	12	269	20	288	12045	825600940	19078904	18779362	12064	826911513	20389477	20089935	1310573	1.11470244627185	0.291062020655841	19734190.5	826256226.5	19434648.5	cela1_red_10_18779362	cela1_red_10_20089935
LG12.c.269.20	Female	-1896.59895499915	-1887.52726973386	12	269	20	288	12045	825600940	19078904	18779362	12064	826911513	20389477	20089935	1310573	18.1433705305708	2.04881441151494e-05	19734190.5	826256226.5	19434648.5	cela1_red_10_18779362	cela1_red_10_20089935
LG12.c.270.20	Both	-2818.11794510679	-2808.2023617239	12	270	20	289	12046	825641365	19119329	18819787	12065	827142310	20620274	20320732	1500945	19.8311667657763	8.45920710057513e-06	19869801.5	826391837.5	19570259.5	cela1_red_10_18819787	cela1_red_10_20320732
LG12.c.270.20	Male	-884.663280638415	-884.058191616271	12	270	20	289	12046	825641365	19119329	18819787	12065	827142310	20620274	20320732	1500945	1.21017804428857	0.27129686354475	19869801.5	826391837.5	19570259.5	cela1_red_10_18819787	cela1_red_10_20320732
LG12.c.270.20	Female	-1896.59758862127	-1887.82719298945	12	270	20	289	12046	825641365	19119329	18819787	12065	827142310	20620274	20320732	1500945	17.5407912636388	2.81209393142579e-05	19869801.5	826391837.5	19570259.5	cela1_red_10_18819787	cela1_red_10_20320732
LG12.c.271.20	Both	-2818.12843696695	-2806.67576785581	12	271	20	290	12047	825692791	19170755	18871213	12066	827297855	20775819	20476277	1605064	22.905338222271	1.70178580061187e-06	19973287	826495323	19673745	cela1_red_10_18871213	cela1_red_10_20476277
LG12.c.271.20	Male	-884.662779390562	-884.143952942365	12	271	20	290	12047	825692791	19170755	18871213	12066	827297855	20775819	20476277	1605064	1.037652896395	0.308367975062442	19973287	826495323	19673745	cela1_red_10_18871213	cela1_red_10_20476277
LG12.c.271.20	Female	-1896.60375695334	-1886.58766038733	12	271	20	290	12047	825692791	19170755	18871213	12066	827297855	20775819	20476277	1605064	20.0321931320223	7.61493127887647e-06	19973287	826495323	19673745	cela1_red_10_18871213	cela1_red_10_20476277
LG12.c.272.20	Both	-2818.13036797692	-2806.33582337872	12	272	20	291	12048	825736758	19214722	18915180	12067	827341085	20819049	20519507	1604327	23.5890891963918	1.19261844433449e-06	20016885.5	826538921.5	19717343.5	cela1_red_10_18915180	cela1_red_10_20519507
LG12.c.272.20	Male	-884.662758761093	-884.045405196654	12	272	20	291	12048	825736758	19214722	18915180	12067	827341085	20819049	20519507	1604327	1.23470712887683	0.266493562838617	20016885.5	826538921.5	19717343.5	cela1_red_10_18915180	cela1_red_10_20519507
LG12.c.272.20	Female	-1896.60524604238	-1886.410926449	12	272	20	291	12048	825736758	19214722	18915180	12067	827341085	20819049	20519507	1604327	20.3886391867663	6.32039018300112e-06	20016885.5	826538921.5	19717343.5	cela1_red_10_18915180	cela1_red_10_20519507
LG12.c.273.20	Both	-2818.15078710893	-2805.73729399403	12	273	20	292	12049	825921011	19398975	19099433	12068	827404788	20882752	20583210	1483777	24.8269862297975	6.2713310466922e-07	20140863.5	826662899.5	19841321.5	cela1_red_10_19099433	cela1_red_10_20583210
LG12.c.273.20	Male	-884.662714243774	-884.290835892647	12	273	20	292	12049	825921011	19398975	19099433	12068	827404788	20882752	20583210	1483777	0.743756702255041	0.388460123569418	20140863.5	826662899.5	19841321.5	cela1_red_10_19099433	cela1_red_10_20583210
LG12.c.273.20	Female	-1896.61532024502	-1886.28249163918	12	273	20	292	12049	825921011	19398975	19099433	12068	827404788	20882752	20583210	1483777	20.6656572116681	5.46881385699027e-06	20140863.5	826662899.5	19841321.5	cela1_red_10_19099433	cela1_red_10_20583210
LG12.c.274.20	Both	-2818.16244240677	-2805.5167322985	12	274	20	293	12050	826017428	19495392	19195850	12069	827436275	20914239	20614697	1418847	25.2914202165412	4.92896355286376e-07	20204815.5	826726851.5	19905273.5	cela1_red_10_19195850	cela1_red_10_20614697
LG12.c.274.20	Male	-884.663531125317	-884.08312491946	12	274	20	293	12050	826017428	19495392	19195850	12069	827436275	20914239	20614697	1418847	1.16081241171401	0.281297117110087	20204815.5	826726851.5	19905273.5	cela1_red_10_19195850	cela1_red_10_20614697
LG12.c.274.20	Female	-1896.62111032841	-1886.27768460378	12	274	20	293	12050	826017428	19495392	19195850	12069	827436275	20914239	20614697	1418847	20.6868514492453	5.40861301123741e-06	20204815.5	826726851.5	19905273.5	cela1_red_10_19195850	cela1_red_10_20614697
LG12.c.275.20	Both	-2818.16371010632	-2805.04084072221	12	275	20	294	12051	826034419	19512383	19212841	12070	827465373	20943337	20643795	1430954	26.245738768238	3.00617414850102e-07	20227860	826749896	19928318	cela1_red_10_19212841	cela1_red_10_20643795
LG12.c.275.20	Male	-884.663455946753	-884.086631096925	12	275	20	294	12051	826034419	19512383	19212841	12070	827465373	20943337	20643795	1430954	1.15364969965549	0.282786440948494	20227860	826749896	19928318	cela1_red_10_19212841	cela1_red_10_20643795
LG12.c.275.20	Female	-1896.62288408516	-1885.75594854979	12	275	20	294	12051	826034419	19512383	19212841	12070	827465373	20943337	20643795	1430954	21.7338710707481	3.13212070823798e-06	20227860	826749896	19928318	cela1_red_10_19212841	cela1_red_10_20643795
LG12.c.276.20	Both	-2818.16254616994	-2805.1767611462	12	276	20	295	12052	826089471	19567435	19267893	12071	827573182	21051146	20751604	1483711	25.9715700474771	3.46482372459711e-07	20309290.5	826831326.5	20009748.5	cela1_red_10_19267893	cela1_red_10_20751604
LG12.c.276.20	Male	-884.663007446359	-884.308978294177	12	276	20	295	12052	826089471	19567435	19267893	12071	827573182	21051146	20751604	1483711	0.708058304363703	0.400089162345339	20309290.5	826831326.5	20009748.5	cela1_red_10_19267893	cela1_red_10_20751604
LG12.c.276.20	Female	-1896.62271919499	-1885.87499447735	12	276	20	295	12052	826089471	19567435	19267893	12071	827573182	21051146	20751604	1483711	21.4954494352874	3.54669298330279e-06	20309290.5	826831326.5	20009748.5	cela1_red_10_19267893	cela1_red_10_20751604
LG12.c.277.20	Both	-2818.16614471676	-2804.82159969038	12	277	20	296	12053	826184774	19662738	19363196	12072	827611169	21089133	20789591	1426395	26.6890900527751	2.38966990750988e-07	20375935.5	826897971.5	20076393.5	cela1_red_10_19363196	cela1_red_10_20789591
LG12.c.277.20	Male	-884.663200520199	-884.249417770313	12	277	20	296	12053	826184774	19662738	19363196	12072	827611169	21089133	20789591	1426395	0.827565499771254	0.362977436056087	20375935.5	826897971.5	20076393.5	cela1_red_10_19363196	cela1_red_10_20789591
LG12.c.277.20	Female	-1896.62431998907	-1885.5672910711	12	277	20	296	12053	826184774	19662738	19363196	12072	827611169	21089133	20789591	1426395	22.114057835955	2.56921387709053e-06	20375935.5	826897971.5	20076393.5	cela1_red_10_19363196	cela1_red_10_20789591
LG12.c.278.20	Both	-2818.16777283404	-2804.16393828125	12	278	20	297	12054	826207323	19685287	19385745	12073	827703171	21181135	20881593	1495848	28.0076691055838	1.2083561695686e-07	20433211	826955247	20133669	cela1_red_10_19385745	cela1_red_10_20881593
LG12.c.278.20	Male	-884.663287095923	-884.279353799414	12	278	20	297	12054	826207323	19685287	19385745	12073	827703171	21181135	20881593	1495848	0.767866593018653	0.380877849045248	20433211	826955247	20133669	cela1_red_10_19385745	cela1_red_10_20881593
LG12.c.278.20	Female	-1896.62614683097	-1884.86553347956	12	278	20	297	12054	826207323	19685287	19385745	12073	827703171	21181135	20881593	1495848	23.5212267028296	1.23543207175558e-06	20433211	826955247	20133669	cela1_red_10_19385745	cela1_red_10_20881593
LG12.c.279.20	Both	-2818.16197654283	-2804.39512444144	12	279	20	298	12055	826347441	19825405	19525863	12074	827741684	21219648	20920106	1394243	27.5337042027868	1.54380618511141e-07	20522526.5	827044562.5	20222984.5	cela1_red_10_19525863	cela1_red_10_20920106
LG12.c.279.20	Male	-884.663750321312	-884.142210363791	12	279	20	298	12055	826347441	19825405	19525863	12074	827741684	21219648	20920106	1394243	1.04307991504174	0.307106245485609	20522526.5	827044562.5	20222984.5	cela1_red_10_19525863	cela1_red_10_20920106
LG12.c.279.20	Female	-1896.62236278002	-1885.11682646169	12	279	20	298	12055	826347441	19825405	19525863	12074	827741684	21219648	20920106	1394243	23.0110726366693	1.61071025883697e-06	20522526.5	827044562.5	20222984.5	cela1_red_10_19525863	cela1_red_10_20920106
LG12.c.280.20	Both	-2818.17146457852	-2804.06336010241	12	280	20	299	12056	826380700	19858664	19559122	12075	827760920	21238884	20939342	1380220	28.2162089522299	1.08492206218891e-07	20548774	827070810	20249232	cela1_red_10_19559122	cela1_red_10_20939342
LG12.c.280.20	Male	-884.66367473451	-884.178177208449	12	280	20	299	12056	826380700	19858664	19559122	12075	827760920	21238884	20939342	1380220	0.970995052122134	0.324432141111601	20548774	827070810	20249232	cela1_red_10_19559122	cela1_red_10_20939342
LG12.c.280.20	Female	-1896.6309742917	-1884.67325079148	12	280	20	299	12056	826380700	19858664	19559122	12075	827760920	21238884	20939342	1380220	23.9154470004451	1.00660818891374e-06	20548774	827070810	20249232	cela1_red_10_19559122	cela1_red_10_20939342
LG12.c.281.20	Both	-2818.17600956621	-2803.86685180184	12	281	20	300	12057	826439273	19917237	19617695	12076	827798608	21276572	20977030	1359335	28.6183155287354	8.81445018086069e-08	20596904.5	827118940.5	20297362.5	cela1_red_10_19617695	cela1_red_10_20977030
LG12.c.281.20	Male	-884.663924618614	-884.102963414036	12	281	20	300	12057	826439273	19917237	19617695	12076	827798608	21276572	20977030	1359335	1.12192240915761	0.289504885821367	20596904.5	827118940.5	20297362.5	cela1_red_10_19617695	cela1_red_10_20977030
LG12.c.281.20	Female	-1896.6340365828	-1884.46260819523	12	281	20	300	12057	826439273	19917237	19617695	12076	827798608	21276572	20977030	1359335	24.3428567751316	8.06251638896249e-07	20596904.5	827118940.5	20297362.5	cela1_red_10_19617695	cela1_red_10_20977030
LG12.c.282.20	Both	-2818.18576562614	-2803.92016918265	12	282	20	301	12058	826519623	19997587	19698045	12077	827822123	21300087	21000545	1302500	28.5311928869714	9.22010597870226e-08	20648837	827170873	20349295	cela1_red_10_19698045	cela1_red_10_21000545
LG12.c.282.20	Male	-884.664072686202	-884.164297864472	12	282	20	301	12058	826519623	19997587	19698045	12077	827822123	21300087	21000545	1302500	0.999549643459204	0.317419505505283	20648837	827170873	20349295	cela1_red_10_19698045	cela1_red_10_21000545
LG12.c.282.20	Female	-1896.63925385265	-1884.23339984896	12	282	20	301	12058	826519623	19997587	19698045	12077	827822123	21300087	21000545	1302500	24.8117080073694	6.32123513422123e-07	20648837	827170873	20349295	cela1_red_10_19698045	cela1_red_10_21000545
LG12.c.283.20	Both	-2818.16431857121	-2804.72083571337	12	283	20	302	12059	826583942	20061906	19762364	12078	827877326	21355290	21055748	1293384	26.8869657156692	2.15708752526744e-07	20708598	827230634	20409056	cela1_red_10_19762364	cela1_red_10_21055748
LG12.c.283.20	Male	-884.662626676993	-884.481757293659	12	283	20	302	12059	826583942	20061906	19762364	12078	827877326	21355290	21055748	1293384	0.361738766666804	0.547542151297514	20708598	827230634	20409056	cela1_red_10_19762364	cela1_red_10_21055748
LG12.c.283.20	Female	-1896.62977102233	-1884.60590730651	12	283	20	302	12059	826583942	20061906	19762364	12078	827877326	21355290	21055748	1293384	24.0477274316504	9.39771122587807e-07	20708598	827230634	20409056	cela1_red_10_19762364	cela1_red_10_21055748
LG12.c.284.20	Both	-2818.15718761219	-2804.91278342388	12	284	20	303	12060	826649623	20127587	19828045	12079	827914073	21392037	21092495	1264450	26.4888083766227	2.65069340366075e-07	20759812	827281848	20460270	cela1_red_10_19828045	cela1_red_10_21092495
LG12.c.284.20	Male	-884.662385449977	-884.517069758342	12	284	20	303	12060	826649623	20127587	19828045	12079	827914073	21392037	21092495	1264450	0.290631383270011	0.589816208893741	20759812	827281848	20460270	cela1_red_10_19828045	cela1_red_10_21092495
LG12.c.284.20	Female	-1896.62558853855	-1884.7792704718	12	284	20	303	12060	826649623	20127587	19828045	12079	827914073	21392037	21092495	1264450	23.6926361334954	1.13014140679102e-06	20759812	827281848	20460270	cela1_red_10_19828045	cela1_red_10_21092495
LG12.c.285.20	Both	-2818.15680085702	-2804.90828317799	12	285	20	304	12061	826673841	20151805	19852263	12080	827936763	21414727	21115185	1262922	26.4970353580675	2.6394286656295e-07	20783266	827305302	20483724	cela1_red_10_19852263	cela1_red_10_21115185
LG12.c.285.20	Male	-884.662535088717	-884.495802262694	12	285	20	304	12061	826673841	20151805	19852263	12080	827936763	21414727	21115185	1262922	0.333465652046016	0.563625477488009	20783266	827305302	20483724	cela1_red_10_19852263	cela1_red_10_21115185
LG12.c.285.20	Female	-1896.62366675627	-1884.77090125269	12	285	20	304	12061	826673841	20151805	19852263	12080	827936763	21414727	21115185	1262922	23.7055310071742	1.12259445472773e-06	20783266	827305302	20483724	cela1_red_10_19852263	cela1_red_10_21115185
LG12.c.286.20	Both	-2818.1519412548	-2804.9820156422	12	286	20	305	12062	826833739	20311703	20012161	12081	828003797	21481761	21182219	1170058	26.3398512251988	2.86319450815142e-07	20896732	827418768	20597190	cela1_red_10_20012161	cela1_red_10_21182219
LG12.c.286.20	Male	-884.662365020566	-884.520537339408	12	286	20	305	12062	826833739	20311703	20012161	12081	828003797	21481761	21182219	1170058	0.283655362316495	0.594315310661538	20896732	827418768	20597190	cela1_red_10_20012161	cela1_red_10_21182219
LG12.c.286.20	Female	-1896.62024051523	-1884.80239293782	12	286	20	305	12062	826833739	20311703	20012161	12081	828003797	21481761	21182219	1170058	23.6356951548132	1.1640802550783e-06	20896732	827418768	20597190	cela1_red_10_20012161	cela1_red_10_21182219
LG12.c.287.20	Both	-2818.17347084469	-2804.5935755937	12	287	20	306	12063	826892097	20370061	20070519	12082	828064106	21542070	21242528	1172009	27.1597905019917	1.87314198818456e-07	20956065.5	827478101.5	20656523.5	cela1_red_10_20070519	cela1_red_10_21242528
LG12.c.287.20	Male	-884.662718460008	-884.488742031869	12	287	20	306	12063	826892097	20370061	20070519	12082	828064106	21542070	21242528	1172009	0.347952856277061	0.555274262297498	20956065.5	827478101.5	20656523.5	cela1_red_10_20070519	cela1_red_10_21242528
LG12.c.287.20	Female	-1896.6330513284	-1883.94250476646	12	287	20	306	12063	826892097	20370061	20070519	12082	828064106	21542070	21242528	1172009	25.3810931238736	4.70507016014921e-07	20956065.5	827478101.5	20656523.5	cela1_red_10_20070519	cela1_red_10_21242528
LG12.c.288.20	Both	-2818.17664653797	-2804.36935836563	12	288	20	307	12064	826911513	20389477	20089935	12083	828116957	21594921	21295379	1205444	27.6145763446784	1.48058809323892e-07	20992199	827514235	20692657	cela1_red_10_20089935	cela1_red_10_21295379
LG12.c.288.20	Male	-884.663684620249	-884.27115946359	12	288	20	307	12064	826911513	20389477	20089935	12083	828116957	21594921	21295379	1205444	0.785050313319061	0.375601011026613	20992199	827514235	20692657	cela1_red_10_20089935	cela1_red_10_21295379
LG12.c.288.20	Female	-1896.63451759909	-1883.88677122268	12	288	20	307	12064	826911513	20389477	20089935	12083	828116957	21594921	21295379	1205444	25.4954927528192	4.4341759608546e-07	20992199	827514235	20692657	cela1_red_10_20089935	cela1_red_10_21295379
LG12.c.289.20	Both	-2818.17757480519	-2804.14057912873	12	289	20	308	12065	827142310	20620274	20320732	12084	828194016	21671980	21372438	1051706	28.0739913529242	1.16764567792416e-07	21146127	827668163	20846585	cela1_red_10_20320732	cela1_red_10_21372438
LG12.c.289.20	Male	-884.663995220893	-884.1453243141	12	289	20	308	12065	827142310	20620274	20320732	12084	828194016	21671980	21372438	1051706	1.03734181358618	0.308440502593336	21146127	827668163	20846585	cela1_red_10_20320732	cela1_red_10_21372438
LG12.c.289.20	Female	-1896.63444539551	-1883.85744828128	12	289	20	308	12065	827142310	20620274	20320732	12084	828194016	21671980	21372438	1051706	25.5539942284554	4.30174627807922e-07	21146127	827668163	20846585	cela1_red_10_20320732	cela1_red_10_21372438
LG12.c.290.20	Both	-2818.17889119316	-2804.02302435564	12	290	20	309	12066	827297855	20775819	20476277	12085	828552536	22030500	21730958	1254681	28.3117336750402	1.03268121387501e-07	21403159.5	827925195.5	21103617.5	cela1_red_10_20476277	cela1_red_10_21730958
LG12.c.290.20	Male	-884.664015021076	-884.15445609607	12	290	20	309	12066	827297855	20775819	20476277	12085	828552536	22030500	21730958	1254681	1.01911785001221	0.312728349015228	21403159.5	827925195.5	21103617.5	cela1_red_10_20476277	cela1_red_10_21730958
LG12.c.290.20	Female	-1896.63517939413	-1883.81903260819	12	290	20	309	12066	827297855	20775819	20476277	12085	828552536	22030500	21730958	1254681	25.632293571879	4.13068338644962e-07	21403159.5	827925195.5	21103617.5	cela1_red_10_20476277	cela1_red_10_21730958
LG12.c.291.20	Both	-2818.16789395816	-2805.61262809564	12	291	20	310	12067	827341085	20819049	20519507	12086	828629574	22107538	21807996	1288489	25.1105317250522	5.41363828765462e-07	21463293.5	827985329.5	21163751.5	cela1_red_10_20519507	cela1_red_10_21807996
LG12.c.291.20	Male	-884.663736839571	-884.237513868642	12	291	20	310	12067	827341085	20819049	20519507	12086	828629574	22107538	21807996	1288489	0.852445941857241	0.355861312367802	21463293.5	827985329.5	21163751.5	cela1_red_10_20519507	cela1_red_10_21807996
LG12.c.291.20	Female	-1896.62975025211	-1884.88119027684	12	291	20	310	12067	827341085	20819049	20519507	12086	828629574	22107538	21807996	1288489	23.4971199505389	1.25100896475328e-06	21463293.5	827985329.5	21163751.5	cela1_red_10_20519507	cela1_red_10_21807996
LG12.c.292.20	Both	-2818.18687742099	-2805.35320020561	12	292	20	311	12068	827404788	20882752	20583210	12087	828699985	22177949	21878407	1295197	25.6673544307669	4.05631164879239e-07	21530350.5	828052386.5	21230808.5	cela1_red_10_20583210	cela1_red_10_21878407
LG12.c.292.20	Male	-884.665073997611	-883.928490756105	12	292	20	311	12068	827404788	20882752	20583210	12087	828699985	22177949	21878407	1295197	1.47316648301239	0.224846757816851	21530350.5	828052386.5	21230808.5	cela1_red_10_20583210	cela1_red_10_21878407
LG12.c.292.20	Female	-1896.63909764956	-1884.6944975751	12	292	20	311	12068	827404788	20882752	20583210	12087	828699985	22177949	21878407	1295197	23.8892001489112	1.02042624650078e-06	21530350.5	828052386.5	21230808.5	cela1_red_10_20583210	cela1_red_10_21878407
LG12.c.293.20	Both	-2818.16653524454	-2806.34910583427	12	293	20	312	12069	827436275	20914239	20614697	12088	828740886	22218850	21919308	1304611	23.6348588205456	1.16458628296456e-06	21566544.5	828088580.5	21267002.5	cela1_red_10_20614697	cela1_red_10_21919308
LG12.c.293.20	Male	-884.664349290893	-884.002656730038	12	293	20	312	12069	827436275	20914239	20614697	12088	828740886	22218850	21919308	1304611	1.32338512170941	0.249985429662288	21566544.5	828088580.5	21267002.5	cela1_red_10_20614697	cela1_red_10_21919308
LG12.c.293.20	Female	-1896.62845953305	-1885.71937388219	12	293	20	312	12069	827436275	20914239	20614697	12088	828740886	22218850	21919308	1304611	21.8181713017175	2.99747827536834e-06	21566544.5	828088580.5	21267002.5	cela1_red_10_20614697	cela1_red_10_21919308
LG12.c.294.20	Both	-2818.15306025485	-2806.65382192433	12	294	20	313	12070	827465373	20943337	20643795	12089	828877208	22355172	22055630	1411835	22.9984766610396	1.62129817093959e-06	21649254.5	828171290.5	21349712.5	cela1_red_10_20643795	cela1_red_10_22055630
LG12.c.294.20	Male	-884.663457788618	-884.133181053417	12	294	20	313	12070	827465373	20943337	20643795	12089	828877208	22355172	22055630	1411835	1.06055347040251	0.303088985146048	21649254.5	828171290.5	21349712.5	cela1_red_10_20643795	cela1_red_10_22055630
LG12.c.294.20	Female	-1896.62226380339	-1885.89980959938	12	294	20	313	12070	827465373	20943337	20643795	12089	828877208	22355172	22055630	1411835	21.4449084080288	3.64141673503404e-06	21649254.5	828171290.5	21349712.5	cela1_red_10_20643795	cela1_red_10_22055630
LG12.c.295.20	Both	-2818.15155335546	-2806.61647004857	12	295	20	314	12071	827573182	21051146	20751604	12090	828991652	22469616	22170074	1418470	23.0701666137684	1.56195555922611e-06	21760381	828282417	21460839	cela1_red_10_20751604	cela1_red_10_22170074
LG12.c.295.20	Male	-884.66351934549	-884.101877125653	12	295	20	314	12071	827573182	21051146	20751604	12090	828991652	22469616	22170074	1418470	1.1232844396734	0.28921232677654	21760381	828282417	21460839	cela1_red_10_20751604	cela1_red_10_22170074
LG12.c.295.20	Female	-1896.62039708246	-1885.82999731885	12	295	20	314	12071	827573182	21051146	20751604	12090	828991652	22469616	22170074	1418470	21.5807995272226	3.39230907220323e-06	21760381	828282417	21460839	cela1_red_10_20751604	cela1_red_10_22170074
LG12.c.296.20	Both	-2818.15367373099	-2806.58868234537	12	296	20	315	12072	827611169	21089133	20789591	12091	829002214	22480178	22180636	1391045	23.1299827712301	1.51411215443265e-06	21784655.5	828306691.5	21485113.5	cela1_red_10_20789591	cela1_red_10_22180636
LG12.c.296.20	Male	-884.663572218673	-884.165010595092	12	296	20	315	12072	827611169	21089133	20789591	12091	829002214	22480178	22180636	1391045	0.997123247161426	0.318007600513504	21784655.5	828306691.5	21485113.5	cela1_red_10_20789591	cela1_red_10_22180636
LG12.c.296.20	Female	-1896.62144912757	-1885.7045840146	12	296	20	315	12072	827611169	21089133	20789591	12091	829002214	22480178	22180636	1391045	21.8337302259301	2.97327025600147e-06	21784655.5	828306691.5	21485113.5	cela1_red_10_20789591	cela1_red_10_22180636
LG12.c.297.20	Both	-2818.1500390564	-2807.28755229319	12	297	20	316	12073	827703171	21181135	20881593	12092	829034123	22512087	22212545	1330952	21.724973526434	3.14668107881388e-06	21846611	828368647	21547069	cela1_red_10_20881593	cela1_red_10_22212545
LG12.c.297.20	Male	-884.663511016776	-884.266031346349	12	297	20	316	12073	827703171	21181135	20881593	12092	829034123	22512087	22212545	1330952	0.794959340852984	0.372604729863654	21846611	828368647	21547069	cela1_red_10_20881593	cela1_red_10_22212545
LG12.c.297.20	Female	-1896.61984170825	-1886.07537855659	12	297	20	316	12073	827703171	21181135	20881593	12092	829034123	22512087	22212545	1330952	21.0889263033214	4.38454598283844e-06	21846611	828368647	21547069	cela1_red_10_20881593	cela1_red_10_22212545
LG12.c.298.20	Both	-2818.14504280413	-2807.95355508626	12	298	20	317	12074	827741684	21219648	20920106	12093	829187486	22665450	22365908	1445802	20.3829754357321	6.33912410075155e-06	21942549	828464585	21643007	cela1_red_10_20920106	cela1_red_10_22365908
LG12.c.298.20	Male	-884.663634402501	-884.188931215405	12	298	20	317	12074	827741684	21219648	20920106	12093	829187486	22665450	22365908	1445802	0.94940637419154	0.329870445685305	21942549	828464585	21643007	cela1_red_10_20920106	cela1_red_10_22365908
LG12.c.298.20	Female	-1896.61580431641	-1886.68924804554	12	298	20	317	12074	827741684	21219648	20920106	12093	829187486	22665450	22365908	1445802	19.8531125417462	8.36264575909684e-06	21942549	828464585	21643007	cela1_red_10_20920106	cela1_red_10_22365908
LG12.c.299.20	Both	-2818.13820521586	-2808.39418248072	12	299	20	318	12075	827760920	21238884	20939342	12094	829217360	22695324	22395782	1456440	19.4880454702907	1.01231249346467e-05	21967104	828489140	21667562	cela1_red_10_20939342	cela1_red_10_22395782
LG12.c.299.20	Male	-884.663728684329	-884.066429948324	12	299	20	318	12075	827760920	21238884	20939342	12094	829217360	22695324	22395782	1456440	1.19459747200835	0.274404149469686	21967104	828489140	21667562	cela1_red_10_20939342	cela1_red_10_22395782
LG12.c.299.20	Female	-1896.61262518679	-1886.77495849502	12	299	20	318	12075	827760920	21238884	20939342	12094	829217360	22695324	22395782	1456440	19.6753333835536	9.17784372689301e-06	21967104	828489140	21667562	cela1_red_10_20939342	cela1_red_10_22395782
LG12.c.300.20	Both	-2818.12940757482	-2810.51443836102	12	300	20	319	12076	827798608	21276572	20977030	12095	829245916	22723880	22424338	1447308	15.2299384275966	9.51824544086488e-05	22000226	828522262	21700684	cela1_red_10_20977030	cela1_red_10_22424338
LG12.c.300.20	Male	-884.663910167947	-884.044350201301	12	300	20	319	12076	827798608	21276572	20977030	12095	829245916	22723880	22424338	1447308	1.23911993329216	0.26564073156574	22000226	828522262	21700684	cela1_red_10_20977030	cela1_red_10_22424338
LG12.c.300.20	Female	-1896.6045851401	-1889.88447906817	12	300	20	319	12076	827798608	21276572	20977030	12095	829245916	22723880	22424338	1447308	13.4402121438602	0.000246287769619546	22000226	828522262	21700684	cela1_red_10_20977030	cela1_red_10_22424338
LG12.c.301.20	Both	-2818.12393362073	-2810.51801824762	12	301	20	320	12077	827822123	21300087	21000545	12096	829272271	22750235	22450693	1450148	15.211830746227	9.60994802366999e-05	22025161	828547197	21725619	cela1_red_10_21000545	cela1_red_10_22450693
LG12.c.301.20	Male	-884.663567529538	-884.03719692992	12	301	20	320	12077	827822123	21300087	21000545	12096	829272271	22750235	22450693	1450148	1.25274119923597	0.263029568213219	22025161	828547197	21725619	cela1_red_10_21000545	cela1_red_10_22450693
LG12.c.301.20	Female	-1896.60118990192	-1889.74059934515	12	301	20	320	12077	827822123	21300087	21000545	12096	829272271	22750235	22450693	1450148	13.7211811135353	0.00021204948009812	22025161	828547197	21725619	cela1_red_10_21000545	cela1_red_10_22450693
LG12.c.302.20	Both	-2818.1166607102	-2809.79634624966	12	302	20	321	12078	827877326	21355290	21055748	12097	829789764	23267728	22968186	1912438	16.6406289210718	4.51729315427141e-05	22311509	828833545	22011967	cela1_red_10_21055748	cela1_red_10_22968186
LG12.c.302.20	Male	-884.66326346256	-883.859683589743	12	302	20	321	12078	827877326	21355290	21055748	12097	829789764	23267728	22968186	1912438	1.6071597456355	0.204891514325185	22311509	828833545	22011967	cela1_red_10_21055748	cela1_red_10_22968186
LG12.c.302.20	Female	-1896.59801080913	-1889.17522469346	12	302	20	321	12078	827877326	21355290	21055748	12097	829789764	23267728	22968186	1912438	14.8455722313465	0.000116681665095708	22311509	828833545	22011967	cela1_red_10_21055748	cela1_red_10_22968186
LG12.c.303.20	Both	-2818.11967027886	-2809.11095054606	12	303	20	322	12079	827914073	21392037	21092495	12098	829864468	23342432	23042890	1950395	18.017439465596	2.18890505769842e-05	22367234.5	828889270.5	22067692.5	cela1_red_10_21092495	cela1_sika_10_23042890
LG12.c.303.20	Male	-884.663448946199	-883.461845010496	12	303	20	322	12079	827914073	21392037	21092495	12098	829864468	23342432	23042890	1950395	2.40320787140558	0.121086722679526	22367234.5	828889270.5	22067692.5	cela1_red_10_21092495	cela1_sika_10_23042890
LG12.c.303.20	Female	-1896.59977494824	-1888.6901826647	12	303	20	322	12079	827914073	21392037	21092495	12098	829864468	23342432	23042890	1950395	15.8191845670744	6.96922860069504e-05	22367234.5	828889270.5	22067692.5	cela1_red_10_21092495	cela1_sika_10_23042890
LG12.c.304.20	Both	-2818.12059987037	-2809.37278767109	12	304	20	323	12080	827936763	21414727	21115185	12099	829883178	23361142	23061600	1946415	17.4956243985507	2.87969678882671e-05	22387934.5	828909970.5	22088392.5	cela1_red_10_21115185	cela1_red_10_23061600
LG12.c.304.20	Male	-884.663880314669	-883.260007017058	12	304	20	323	12080	827936763	21414727	21115185	12099	829883178	23361142	23061600	1946415	2.80774659522149	0.0938100630967047	22387934.5	828909970.5	22088392.5	cela1_red_10_21115185	cela1_red_10_23061600
LG12.c.304.20	Female	-1896.59918680021	-1888.92465077619	12	304	20	323	12080	827936763	21414727	21115185	12099	829883178	23361142	23061600	1946415	15.3490720480499	8.93648091023769e-05	22387934.5	828909970.5	22088392.5	cela1_red_10_21115185	cela1_red_10_23061600
LG12.c.305.20	Both	-2818.11803428843	-2809.54367820475	12	305	20	324	12081	828003797	21481761	21182219	12100	829908178	23386142	25661750	1904381	17.1487121673472	3.4564368022072e-05	22433951.5	828955987.5	23421984.5	cela1_red_10_21182219	cela1_red_10_25661750
LG12.c.305.20	Male	-884.663738727248	-883.256097913961	12	305	20	324	12081	828003797	21481761	21182219	12100	829908178	23386142	25661750	1904381	2.81528162657378	0.0933705083232867	22433951.5	828955987.5	23421984.5	cela1_red_10_21182219	cela1_red_10_25661750
LG12.c.305.20	Female	-1896.59828686495	-1889.20374294344	12	305	20	324	12081	828003797	21481761	21182219	12100	829908178	23386142	25661750	1904381	14.7890878430121	0.000120229208858902	22433951.5	828955987.5	23421984.5	cela1_red_10_21182219	cela1_red_10_25661750
LG12.c.306.20	Both	-2818.1175893146	-2809.4895327966	12	306	20	325	12082	828064106	21542070	21242528	12101	830044112	23522076	25797684	1980006	17.2561130360009	3.26644908568152e-05	22532073	829054109	23520106	cela1_red_10_21242528	cela1_red_10_25797684
LG12.c.306.20	Male	-884.663905752796	-882.984816426831	12	306	20	325	12082	828064106	21542070	21242528	12101	830044112	23522076	25797684	1980006	3.35817865193144	0.0668719907439291	22532073	829054109	23520106	cela1_red_10_21242528	cela1_red_10_25797684
LG12.c.306.20	Female	-1896.59786105925	-1888.7447267628	12	306	20	325	12082	828064106	21542070	21242528	12101	830044112	23522076	25797684	1980006	15.7062685929027	7.39785891877842e-05	22532073	829054109	23520106	cela1_red_10_21242528	cela1_red_10_25797684
LG12.c.307.20	Both	-2818.09555086876	-2811.08691349115	12	307	20	326	12083	828116957	21594921	21295379	12102	830074660	23552624	25828232	1957703	14.0172747552215	0.000181138816399029	22573772.5	829095808.5	23561805.5	cela1_red_10_21295379	cela1_red_10_25828232
LG12.c.307.20	Male	-884.663639334667	-883.111655647522	12	307	20	326	12083	828116957	21594921	21295379	12102	830074660	23552624	25828232	1957703	3.10396737429096	0.0781017452552304	22573772.5	829095808.5	23561805.5	cela1_red_10_21295379	cela1_red_10_25828232
LG12.c.307.20	Female	-1896.58394425325	-1890.81664435742	12	307	20	326	12083	828116957	21594921	21295379	12102	830074660	23552624	25828232	1957703	11.534599791657	0.000683127817714402	22573772.5	829095808.5	23561805.5	cela1_red_10_21295379	cela1_red_10_25828232
LG12.c.308.20	Both	-2818.08749053334	-2812.00117595663	12	308	20	327	12084	828194016	21671980	21372438	12103	830177011	23654975	25930583	1982995	12.1726291534305	0.000484959009564911	22663477.5	829185513.5	23651510.5	cela1_red_10_21372438	cela1_red_10_25930583
LG12.c.308.20	Male	-884.662473086805	-883.911979530898	12	308	20	327	12084	828194016	21671980	21372438	12103	830177011	23654975	25930583	1982995	1.50098711181317	0.220519541101423	22663477.5	829185513.5	23651510.5	cela1_red_10_21372438	cela1_red_10_25930583
LG12.c.308.20	Female	-1896.58139353762	-1891.02286626553	12	308	20	327	12084	828194016	21671980	21372438	12103	830177011	23654975	25930583	1982995	11.1170545441769	0.000855375185674578	22663477.5	829185513.5	23651510.5	cela1_red_10_21372438	cela1_red_10_25930583
LG12.c.309.20	Both	-2818.08368066803	-2811.56019082476	12	309	20	328	12085	828552536	22030500	21730958	12104	830210632	23688596	25964204	1658096	13.0469796865273	0.000303773891477954	22859548	829381584	23847581	cela1_red_10_21730958	cela1_red_10_25964204
LG12.c.309.20	Male	-884.662130475683	-884.073841742162	12	309	20	328	12085	828552536	22030500	21730958	12104	830210632	23688596	25964204	1658096	1.17657746704231	0.278053858200124	22859548	829381584	23847581	cela1_red_10_21730958	cela1_red_10_25964204
LG12.c.309.20	Female	-1896.57989440508	-1890.42317994287	12	309	20	328	12085	828552536	22030500	21730958	12104	830210632	23688596	25964204	1658096	12.3134289244185	0.000449711070978354	22859548	829381584	23847581	cela1_red_10_21730958	cela1_red_10_25964204
LG12.c.310.20	Both	-2818.08226767298	-2811.43720524438	12	310	20	329	12086	828629574	22107538	21807996	12105	830251677	23729641	26005249	1622103	13.2901248572043	0.00026680771258869	22918589.5	829440625.5	23906622.5	cela1_red_10_21807996	cela1_red_10_26005249
LG12.c.310.20	Male	-884.66203466279	-884.3978224885	12	310	20	329	12086	828629574	22107538	21807996	12105	830251677	23729641	26005249	1622103	0.528424348579392	0.467270050307343	22918589.5	829440625.5	23906622.5	cela1_red_10_21807996	cela1_red_10_26005249
LG12.c.310.20	Female	-1896.5794660227	-1890.26031060789	12	310	20	329	12086	828629574	22107538	21807996	12105	830251677	23729641	26005249	1622103	12.63831082962	0.000377921302206818	22918589.5	829440625.5	23906622.5	cela1_red_10_21807996	cela1_red_10_26005249
LG12.c.311.20	Both	-2818.08108599019	-2811.46633680608	12	311	20	330	12087	828699985	22177949	21878407	12106	830287903	23765867	26041475	1587918	13.2294983682323	0.00027557755357821	22971908	829493944	23959941	cela1_red_10_21878407	cela1_red_10_26041475
LG12.c.311.20	Male	-884.662080051913	-884.366398069811	12	311	20	330	12087	828699985	22177949	21878407	12106	830287903	23765867	26041475	1587918	0.59136396420331	0.44189216639488	22971908	829493944	23959941	cela1_red_10_21878407	cela1_red_10_26041475
LG12.c.311.20	Female	-1896.57831453707	-1890.42075469742	12	311	20	330	12087	828699985	22177949	21878407	12106	830287903	23765867	26041475	1587918	12.3151196792837	0.000449303901114972	22971908	829493944	23959941	cela1_red_10_21878407	cela1_red_10_26041475
LG12.c.312.20	Both	-2818.06209004324	-2815.17947382919	12	312	20	331	12088	828740886	22218850	21919308	12107	830352700	23830664	26106272	1611814	5.76523242809981	0.0163463226536728	23024757	829546793	24012790	cela1_red_10_21919308	cela1_red_10_26106272
LG12.c.312.20	Male	-884.660921514125	-884.660922362306	12	312	20	331	12088	828740886	22218850	21919308	12107	830352700	23830664	26106272	1611814	-1.69636155078479e-06	1	23024757	829546793	24012790	cela1_red_10_21919308	cela1_red_10_26106272
LG12.c.312.20	Female	-1896.5685657032	-1894.30900746846	12	312	20	331	12088	828740886	22218850	21919308	12107	830352700	23830664	26106272	1611814	4.51911646949293	0.033518136492701	23024757	829546793	24012790	cela1_red_10_21919308	cela1_red_10_26106272
LG12.c.313.20	Both	-2818.0621963307	-2815.4660933268	12	313	20	332	12089	828877208	22355172	22055630	12108	830379758	23857722	26133330	1502550	5.19220600778772	0.0226883989378154	23106447	829628483	24094480	cela1_red_10_22055630	cela1_red_10_26133330
LG12.c.313.20	Male	-884.661244311647	-884.661206254725	12	313	20	332	12089	828877208	22355172	22055630	12108	830379758	23857722	26133330	1502550	7.61138444431708e-05	0.993039084186319	23106447	829628483	24094480	cela1_red_10_22055630	cela1_red_10_26133330
LG12.c.313.20	Female	-1896.56865925483	-1894.51070942712	12	313	20	332	12089	828877208	22355172	22055630	12108	830379758	23857722	26133330	1502550	4.11589965541862	0.0424819246287935	23106447	829628483	24094480	cela1_red_10_22055630	cela1_red_10_26133330
LG12.c.314.20	Both	-2818.06321157087	-2815.06324743653	12	314	20	333	12090	828991652	22469616	22170074	12109	830387324	23865288	26140896	1395672	5.99992826867219	0.0143064600950977	23167452	829689488	24155485	cela1_red_10_22170074	cela1_red_10_26140896
LG12.c.314.20	Male	-884.661247202353	-884.66116766956	12	314	20	333	12090	828991652	22469616	22170074	12109	830387324	23865288	26140896	1395672	0.000159065586103679	0.989937250465478	23167452	829689488	24155485	cela1_red_10_22170074	cela1_red_10_26140896
LG12.c.314.20	Female	-1896.56963396831	-1894.04931866974	12	314	20	333	12090	828991652	22469616	22170074	12109	830387324	23865288	26140896	1395672	5.04063059713917	0.0247594754883826	23167452	829689488	24155485	cela1_red_10_22170074	cela1_red_10_26140896
LG12.c.315.20	Both	-2818.06207422579	-2815.65712057875	12	315	20	334	12091	829002214	22480178	22180636	12110	830414579	23892543	26168151	1412365	4.80990729407586	0.0282965674932056	23186360.5	829708396.5	24174393.5	cela1_red_10_22180636	cela1_red_10_26168151
LG12.c.315.20	Male	-884.661266665501	-884.66114412114	12	315	20	334	12091	829002214	22480178	22180636	12110	830414579	23892543	26168151	1412365	0.000245088722977016	0.987509380286286	23186360.5	829708396.5	24174393.5	cela1_red_10_22180636	cela1_red_10_26168151
LG12.c.315.20	Female	-1896.56949423582	-1894.7722237827	12	315	20	334	12091	829002214	22480178	22180636	12110	830414579	23892543	26168151	1412365	3.59454090625195	0.0579696382287415	23186360.5	829708396.5	24174393.5	cela1_red_10_22180636	cela1_red_10_26168151
LG12.c.316.20	Both	-2818.06465935224	-2816.03392426686	12	316	20	335	12092	829034123	22512087	22212545	12111	830622626	24100590	26376198	1588503	4.06147017076	0.0438722875638512	23306338.5	829828374.5	24294371.5	cela1_red_10_22212545	cela1_red_10_26376198
LG12.c.316.20	Male	-884.661079914915	-884.661080172371	12	316	20	335	12092	829034123	22512087	22212545	12111	830622626	24100590	26376198	1588503	-5.14911334903445e-07	1	23306338.5	829828374.5	24294371.5	cela1_red_10_22212545	cela1_red_10_26376198
LG12.c.316.20	Female	-1896.57196692164	-1895.08402951661	12	316	20	335	12092	829034123	22512087	22212545	12111	830622626	24100590	26376198	1588503	2.97587481006303	0.084514424457274	23306338.5	829828374.5	24294371.5	cela1_red_10_22212545	cela1_red_10_26376198
LG12.c.317.20	Both	-2818.06458589577	-2815.93477845579	12	317	20	336	12093	829187486	22665450	22365908	12112	830988050	24466014	26741622	1800564	4.25961487996483	0.0390287686266021	23565732	830087768	24553765	cela1_red_10_22365908	cela1_red_10_26741622
LG12.c.317.20	Male	-884.661291092079	-884.660997360921	12	317	20	336	12093	829187486	22665450	22365908	12112	830988050	24466014	26741622	1800564	0.000587462315706944	0.980663068994735	23565732	830087768	24553765	cela1_red_10_22365908	cela1_red_10_26741622
LG12.c.317.20	Female	-1896.5718940701	-1895.02492113321	12	317	20	336	12093	829187486	22665450	22365908	12112	830988050	24466014	26741622	1800564	3.09394587379029	0.0785840328356031	23565732	830087768	24553765	cela1_red_10_22365908	cela1_red_10_26741622
LG12.c.318.20	Both	-2818.06473985713	-2815.36828470276	12	318	20	337	12094	829217360	22695324	22395782	12113	830997161	24475125	26750733	1779801	5.39291030874938	0.0202187221457264	23585224.5	830107260.5	24573257.5	cela1_red_10_22395782	cela1_red_10_26750733
LG12.c.318.20	Male	-884.661221547757	-884.661221532867	12	318	20	337	12094	829217360	22695324	22395782	12113	830997161	24475125	26750733	1779801	2.97791302728001e-08	0.999862312008703	23585224.5	830107260.5	24573257.5	cela1_red_10_22395782	cela1_red_10_26750733
LG12.c.318.20	Female	-1896.57172347689	-1894.59989216231	12	318	20	337	12094	829217360	22695324	22395782	12113	830997161	24475125	26750733	1779801	3.9436626291581	0.0470482367880917	23585224.5	830107260.5	24573257.5	cela1_red_10_22395782	cela1_red_10_26750733
LG12.c.319.20	Both	-2818.06476118485	-2815.14194616855	12	319	20	338	12095	829245916	22723880	22424338	12114	831042019	24519983	26795591	1796103	5.84563003259973	0.0156157818539302	23621931.5	830143967.5	24609964.5	cela1_red_10_22424338	cela1_red_10_26795591
LG12.c.319.20	Male	-884.660494523553	-884.660497609566	12	319	20	338	12095	829245916	22723880	22424338	12114	831042019	24519983	26795591	1796103	-6.17202704233932e-06	1	23621931.5	830143967.5	24609964.5	cela1_red_10_22424338	cela1_red_10_26795591
LG12.c.319.20	Female	-1896.57169179716	-1894.27352118853	12	319	20	338	12095	829245916	22723880	22424338	12114	831042019	24519983	26795591	1796103	4.59634121725458	0.0320402645885152	23621931.5	830143967.5	24609964.5	cela1_red_10_22424338	cela1_red_10_26795591
LG12.c.320.20	Both	-2818.06376908696	-2815.36341241804	12	320	20	339	12096	829272271	22750235	22450693	12115	831178785	24656749	26932357	1906514	5.40071333783635	0.020128523033614	23703492	830225528	24691525	cela1_red_10_22450693	cela1_red_10_26932357
LG12.c.320.20	Male	-884.660352236285	-884.660354249811	12	320	20	339	12096	829272271	22750235	22450693	12115	831178785	24656749	26932357	1906514	-4.02705336455256e-06	1	23703492	830225528	24691525	cela1_red_10_22450693	cela1_red_10_26932357
LG12.c.320.20	Female	-1896.57085058556	-1894.4884875555	12	320	20	339	12096	829272271	22750235	22450693	12115	831178785	24656749	26932357	1906514	4.16472606010893	0.0412740868730114	23703492	830225528	24691525	cela1_red_10_22450693	cela1_red_10_26932357
LG12.c.321.20	Both	-2818.06467231717	-2816.40153080486	12	321	20	340	12097	829789764	23267728	22968186	12116	831222653	24700617	26976225	1432889	3.32628302463581	0.0681807970531489	23984172.5	830506208.5	24972205.5	cela1_red_10_22968186	cela1_red_10_26976225
LG12.c.321.20	Male	-884.660507564872	-884.660510994258	12	321	20	340	12097	829789764	23267728	22968186	12116	831222653	24700617	26976225	1432889	-6.85877262185386e-06	1	23984172.5	830506208.5	24972205.5	cela1_red_10_22968186	cela1_red_10_26976225
LG12.c.321.20	Female	-1896.5707465013	-1895.75877203508	12	321	20	340	12097	829789764	23267728	22968186	12116	831222653	24700617	26976225	1432889	1.62394893245028	0.20254204329392	23984172.5	830506208.5	24972205.5	cela1_red_10_22968186	cela1_red_10_26976225
LG12.c.322.20	Both	-2818.0649447955	-2816.58175267273	12	322	20	341	12098	829864468	23342432	23042890	12117	831248607	24726571	27002179	1384139	2.96638424553203	0.0850116684675064	24034501.5	830556537.5	25022534.5	cela1_sika_10_23042890	cela1_sika_10_27002179
LG12.c.322.20	Male	-884.660619209478	-884.660620292616	12	322	20	341	12098	829864468	23342432	23042890	12117	831248607	24726571	27002179	1384139	-2.16627631743904e-06	1	24034501.5	830556537.5	25022534.5	cela1_sika_10_23042890	cela1_sika_10_27002179
LG12.c.322.20	Female	-1896.5699649208	-1895.81462451014	12	322	20	341	12098	829864468	23342432	23042890	12117	831248607	24726571	27002179	1384139	1.51068082131997	0.219035228470282	24034501.5	830556537.5	25022534.5	cela1_sika_10_23042890	cela1_sika_10_27002179
LG12.c.323.20	Both	-2818.06223482773	-2817.23516262445	12	323	20	342	12099	829883178	23361142	23061600	12118	831265275	24743239	27018847	1382097	1.6541444065524	0.19839579256372	24052190.5	830574226.5	25040223.5	cela1_red_10_23061600	cela1_red_10_27018847
LG12.c.323.20	Male	-884.660578224666	-884.660579360002	12	323	20	342	12099	829883178	23361142	23061600	12118	831265275	24743239	27018847	1382097	-2.27067175728735e-06	1	24052190.5	830574226.5	25040223.5	cela1_red_10_23061600	cela1_red_10_27018847
LG12.c.323.20	Female	-1896.56831573323	-1896.16910986278	12	323	20	342	12099	829883178	23361142	23061600	12118	831265275	24743239	27018847	1382097	0.798411740888696	0.371568657504112	24052190.5	830574226.5	25040223.5	cela1_red_10_23061600	cela1_red_10_27018847
LG12.c.324.20	Both	-2818.05937232855	-2817.70186248327	12	324	20	343	12100	829908178	23386142	25661750	12119	831326347	24804311	27079919	1418169	0.715019690554072	0.397782415986103	24095226.5	830617262.5	26370834.5	cela1_red_10_25661750	cela1_red_10_27079919
LG12.c.324.20	Male	-884.660221177656	-884.660222970477	12	324	20	343	12100	829908178	23386142	25661750	12119	831326347	24804311	27079919	1418169	-3.58564147973084e-06	1	24095226.5	830617262.5	26370834.5	cela1_red_10_25661750	cela1_red_10_27079919
LG12.c.324.20	Female	-1896.56765280173	-1896.37594921904	12	324	20	343	12100	829908178	23386142	25661750	12119	831326347	24804311	27079919	1418169	0.383407165380049	0.535785396199544	24095226.5	830617262.5	26370834.5	cela1_red_10_25661750	cela1_red_10_27079919
LG12.c.325.20	Both	-2818.06178856259	-2817.52398745564	12	325	20	344	12101	830044112	23522076	25797684	12120	831353467	24831431	27107039	1309355	1.07560221389576	0.299683458102535	24176753.5	830698789.5	26452361.5	cela1_red_10_25797684	cela1_red_10_27107039
LG12.c.325.20	Male	-884.66056063974	-884.660561837429	12	325	20	344	12101	830044112	23522076	25797684	12120	831353467	24831431	27107039	1309355	-2.39537848756299e-06	1	24176753.5	830698789.5	26452361.5	cela1_red_10_25797684	cela1_red_10_27107039
LG12.c.325.20	Female	-1896.56808286717	-1896.31052815009	12	325	20	344	12101	830044112	23522076	25797684	12120	831353467	24831431	27107039	1309355	0.515109434158148	0.472935347023327	24176753.5	830698789.5	26452361.5	cela1_red_10_25797684	cela1_red_10_27107039
LG12.c.326.20	Both	-2818.06176588792	-2817.5403076906	12	326	20	345	12102	830074660	23552624	25828232	12121	831399885	24877849	27153457	1325225	1.04291639462554	0.307144164418647	24215236.5	830737272.5	26490844.5	cela1_red_10_25828232	cela1_red_10_27153457
LG12.c.326.20	Male	-884.660367619846	-884.660369171586	12	326	20	345	12102	830074660	23552624	25828232	12121	831399885	24877849	27153457	1325225	-3.10347968479618e-06	1	24215236.5	830737272.5	26490844.5	cela1_red_10_25828232	cela1_red_10_27153457
LG12.c.326.20	Female	-1896.56850555112	-1896.28186198353	12	326	20	345	12102	830074660	23552624	25828232	12121	831399885	24877849	27153457	1325225	0.573287135187002	0.448955645129282	24215236.5	830737272.5	26490844.5	cela1_red_10_25828232	cela1_red_10_27153457
LG12.c.327.20	Both	-2818.06028112089	-2817.59103521908	12	327	20	346	12103	830177011	23654975	25930583	12122	831474423	24952387	27227995	1297412	0.938491803622128	0.332666013219414	24303681	830825717	26579289	cela1_red_10_25930583	cela1_red_10_27227995
LG12.c.327.20	Male	-884.660365503802	-884.660367070496	12	327	20	346	12103	830177011	23654975	25930583	12122	831474423	24952387	27227995	1297412	-3.13338887281134e-06	1	24303681	830825717	26579289	cela1_red_10_25930583	cela1_red_10_27227995
LG12.c.327.20	Female	-1896.56808325184	-1896.28852215279	12	327	20	346	12103	830177011	23654975	25930583	12122	831474423	24952387	27227995	1297412	0.559122198096247	0.454614138626763	24303681	830825717	26579289	cela1_red_10_25930583	cela1_red_10_27227995
LG12.c.328.20	Both	-2818.05818918417	-2817.75864547481	12	328	20	347	12104	830210632	23688596	25964204	12123	831521901	24999865	27275473	1311269	0.599087418720046	0.43892642915784	24344230.5	830866266.5	26619838.5	cela1_red_10_25964204	cela1_red_10_27275473
LG12.c.328.20	Male	-884.660353555437	-884.660355157701	12	328	20	347	12104	830210632	23688596	25964204	12123	831521901	24999865	27275473	1311269	-3.20452636515256e-06	1	24344230.5	830866266.5	26619838.5	cela1_red_10_25964204	cela1_red_10_27275473
LG12.c.328.20	Female	-1896.56648271076	-1896.3618995464	12	328	20	347	12104	830210632	23688596	25964204	12123	831521901	24999865	27275473	1311269	0.409166328714491	0.522392947500648	24344230.5	830866266.5	26619838.5	cela1_red_10_25964204	cela1_red_10_27275473
LG12.c.329.20	Both	-2818.05826912826	-2817.80599235151	12	329	20	348	12105	830251677	23729641	26005249	12124	831581161	25059125	27334733	1329484	0.504553553495498	0.47750613425246	24394383	830916419	26669991	cela1_red_10_26005249	cela1_red_10_27334733
LG12.c.329.20	Male	-884.660411157808	-884.660412660735	12	329	20	348	12105	830251677	23729641	26005249	12124	831581161	25059125	27334733	1329484	-3.00585315926583e-06	1	24394383	830916419	26669991	cela1_red_10_26005249	cela1_red_10_27334733
LG12.c.329.20	Female	-1896.56656658995	-1896.41078089966	12	329	20	348	12105	830251677	23729641	26005249	12124	831581161	25059125	27334733	1329484	0.311571380579153	0.57671752049007	24394383	830916419	26669991	cela1_red_10_26005249	cela1_red_10_27334733
LG12.c.330.20	Both	-2818.06208682011	-2817.43610011287	12	330	20	349	12106	830287903	23765867	26041475	12125	831714008	25191972	27467580	1426105	1.25197341448074	0.263175900278355	24478919.5	831000955.5	26754527.5	cela1_red_10_26041475	cela1_red_10_27467580
LG12.c.330.20	Male	-884.660459270244	-884.660460683397	12	330	20	349	12106	830287903	23765867	26041475	12125	831714008	25191972	27467580	1426105	-2.82630685433105e-06	1	24478919.5	831000955.5	26754527.5	cela1_red_10_26041475	cela1_red_10_27467580
LG12.c.330.20	Female	-1896.56994281243	-1895.94730290744	12	330	20	349	12106	830287903	23765867	26041475	12125	831714008	25191972	27467580	1426105	1.2452798099871	0.26445592663879	24478919.5	831000955.5	26754527.5	cela1_red_10_26041475	cela1_red_10_27467580
LG12.c.331.20	Both	-2818.0624934825	-2817.34772417579	12	331	20	350	12107	830352700	23830664	26106272	12126	831746398	25224362	27499970	1393698	1.4295386134163	0.231839751767546	24527513	831049549	26803121	cela1_red_10_26106272	cela1_red_10_27499970
LG12.c.331.20	Male	-884.660370722639	-884.660372317191	12	331	20	350	12107	830352700	23830664	26106272	12126	831746398	25224362	27499970	1393698	-3.18910247187887e-06	1	24527513	831049549	26803121	cela1_red_10_26106272	cela1_red_10_27499970
LG12.c.331.20	Female	-1896.57052117377	-1895.84904573916	12	331	20	350	12107	830352700	23830664	26106272	12126	831746398	25224362	27499970	1393698	1.44295086921511	0.229662421973379	24527513	831049549	26803121	cela1_red_10_26106272	cela1_red_10_27499970
LG12.c.332.20	Both	-2818.06101810577	-2817.41762035715	12	332	20	351	12108	830379758	23857722	26133330	12127	831804151	25282115	27557723	1424393	1.2867954972362	0.25663934058616	24569918.5	831091954.5	26845526.5	cela1_red_10_26133330	cela1_red_10_27557723
LG12.c.332.20	Male	-884.659955474581	-884.659957832468	12	332	20	351	12108	830379758	23857722	26133330	12127	831804151	25282115	27557723	1424393	-4.71577277494362e-06	1	24569918.5	831091954.5	26845526.5	cela1_red_10_26133330	cela1_red_10_27557723
LG12.c.332.20	Female	-1896.56987948439	-1895.83295493441	12	332	20	351	12108	830379758	23857722	26133330	12127	831804151	25282115	27557723	1424393	1.47384909996208	0.224739373026954	24569918.5	831091954.5	26845526.5	cela1_red_10_26133330	cela1_red_10_27557723
LG12.c.333.20	Both	-2818.06074752461	-2817.4108329208	12	333	20	352	12109	830387324	23865288	26140896	12128	831815770	25293734	27569342	1428446	1.29982920762086	0.254244423149903	24579511	831101547	26855119	cela1_red_10_26140896	cela1_red_10_27569342
LG12.c.333.20	Male	-884.659609840123	-884.659613202794	12	333	20	352	12109	830387324	23865288	26140896	12128	831815770	25293734	27569342	1428446	-6.72534315526718e-06	1	24579511	831101547	26855119	cela1_red_10_26140896	cela1_red_10_27569342
LG12.c.333.20	Female	-1896.56976063531	-1895.80646881443	12	333	20	352	12109	830387324	23865288	26140896	12128	831815770	25293734	27569342	1428446	1.52658364176614	0.216625904204146	24579511	831101547	26855119	cela1_red_10_26140896	cela1_red_10_27569342
LG12.c.334.20	Both	-2818.0587903227	-2817.71252076009	12	334	20	353	12110	830414579	23892543	26168151	12129	831883960	25361924	27637532	1469381	0.69253912521981	0.405302070587483	24627233.5	831149269.5	26902841.5	cela1_red_10_26168151	cela1_sika_10_27637532
LG12.c.334.20	Male	-884.660663949954	-884.660665042108	12	334	20	353	12110	830414579	23892543	26168151	12129	831883960	25361924	27637532	1469381	-2.18430795939639e-06	1	24627233.5	831149269.5	26902841.5	cela1_red_10_26168151	cela1_sika_10_27637532
LG12.c.334.20	Female	-1896.56683171278	-1896.34965227838	12	334	20	353	12110	830414579	23892543	26168151	12129	831883960	25361924	27637532	1469381	0.43435886880161	0.509857832156437	24627233.5	831149269.5	26902841.5	cela1_red_10_26168151	cela1_sika_10_27637532
LG12.c.335.20	Both	-2818.06050686353	-2817.53727001696	12	335	20	354	12111	830622626	24100590	26376198	12130	831932150	25410114	27685722	1309524	1.04647369312897	0.30632062709614	24755352	831277388	27030960	cela1_red_10_26376198	cela1_red_10_27685722
LG12.c.335.20	Male	-884.660773474045	-884.660775261229	12	335	20	354	12111	830622626	24100590	26376198	12130	831932150	25410114	27685722	1309524	-3.57436624653928e-06	1	24755352	831277388	27030960	cela1_red_10_26376198	cela1_red_10_27685722
LG12.c.335.20	Female	-1896.56804737765	-1896.28944827261	12	335	20	354	12111	830622626	24100590	26376198	12130	831932150	25410114	27685722	1309524	0.557198210086881	0.455391334135494	24755352	831277388	27030960	cela1_red_10_26376198	cela1_red_10_27685722
LG12.c.336.20	Both	-2818.0562606719	-2818.05589032857	12	336	20	355	12112	830988050	24466014	26741622	12131	832144120	25622084	27897692	1156070	0.000740686667086266	0.978287805789691	25044049	831566085	27319657	cela1_red_10_26741622	cela1_red_10_27897692
LG12.c.336.20	Male	-884.660935340639	-884.66093591424	12	336	20	355	12112	830988050	24466014	26741622	12131	832144120	25622084	27897692	1156070	-1.14720273813873e-06	1	25044049	831566085	27319657	cela1_red_10_26741622	cela1_red_10_27897692
LG12.c.336.20	Female	-1896.56462199147	-1896.56462336205	12	336	20	355	12112	830988050	24466014	26741622	12131	832144120	25622084	27897692	1156070	-2.74115973297739e-06	1	25044049	831566085	27319657	cela1_red_10_26741622	cela1_red_10_27897692
LG12.c.337.20	Both	-2818.05911423799	-2818.00132182246	12	337	20	356	12113	830997161	24475125	26750733	12132	832145019	25622983	27898591	1147858	0.115584831060005	0.733873327571053	25049054	831571090	27324662	cela1_red_10_26750733	cela1_sika_10_27898591
LG12.c.337.20	Male	-884.661595058852	-884.64894214646	12	337	20	356	12113	830997161	24475125	26750733	12132	832145019	25622983	27898591	1147858	0.0253058247837998	0.873607384545736	25049054	831571090	27324662	cela1_red_10_26750733	cela1_sika_10_27898591
LG12.c.337.20	Female	-1896.56560859857	-1896.56561090155	12	337	20	356	12113	830997161	24475125	26750733	12132	832145019	25622983	27898591	1147858	-4.60596402263036e-06	1	25049054	831571090	27324662	cela1_red_10_26750733	cela1_sika_10_27898591
LG12.c.338.20	Both	-2818.06229877528	-2817.84708873009	12	338	20	357	12114	831042019	24519983	26795591	12133	832148597	25626561	27902169	1106578	0.43042009038254	0.511782888276214	25073272	831595308	27348880	cela1_red_10_26795591	cela1_red_10_27902169
LG12.c.338.20	Male	-884.66251297474	-884.491794108904	12	338	20	357	12114	831042019	24519983	26795591	12133	832148597	25626561	27902169	1106578	0.341437731671022	0.559000509284636	25073272	831595308	27348880	cela1_red_10_26795591	cela1_red_10_27902169
LG12.c.338.20	Female	-1896.5670775024	-1896.56272092499	12	338	20	357	12114	831042019	24519983	26795591	12133	832148597	25626561	27902169	1106578	0.00871315482163482	0.925630054361651	25073272	831595308	27348880	cela1_red_10_26795591	cela1_red_10_27902169
LG12.c.339.20	Both	-2818.06295036877	-2817.8163306576	12	339	20	358	12115	831178785	24656749	26932357	12134	832150602	25628566	27904174	971817	0.493239422325132	0.482485820005266	25142657.5	831664693.5	27418265.5	cela1_red_10_26932357	cela1_sika_10_27904174
LG12.c.339.20	Male	-884.662584225975	-884.498778263315	12	339	20	358	12115	831178785	24656749	26932357	12134	832150602	25628566	27904174	971817	0.32761192532007	0.567068668039754	25142657.5	831664693.5	27418265.5	cela1_red_10_26932357	cela1_sika_10_27904174
LG12.c.339.20	Female	-1896.56773082869	-1896.54615898772	12	339	20	358	12115	831178785	24656749	26932357	12134	832150602	25628566	27904174	971817	0.0431436819417286	0.835454962032781	25142657.5	831664693.5	27418265.5	cela1_red_10_26932357	cela1_sika_10_27904174
LG12.c.340.20	Both	-2818.06323999871	-2817.81162067526	12	340	20	359	12116	831222653	24700617	26976225	12135	832193180	25671144	27946752	970527	0.503238646882892	0.478080534951853	25185880.5	831707916.5	27461488.5	cela1_red_10_26976225	cela1_red_10_27946752
LG12.c.340.20	Male	-884.66248430474	-884.521864094373	12	340	20	359	12116	831222653	24700617	26976225	12135	832193180	25671144	27946752	970527	0.28124042073523	0.595889351339568	25185880.5	831707916.5	27461488.5	cela1_red_10_26976225	cela1_red_10_27946752
LG12.c.340.20	Female	-1896.56822162243	-1896.52959022171	12	340	20	359	12116	831222653	24700617	26976225	12135	832193180	25671144	27946752	970527	0.0772628014319707	0.781041628695687	25185880.5	831707916.5	27461488.5	cela1_red_10_26976225	cela1_red_10_27946752
LG12.c.341.20	Both	-2818.06068810603	-2817.93840642022	12	341	20	360	12117	831248607	24726571	27002179	12136	832220406	25698370	27973978	971799	0.244563371620643	0.620929461426848	25212470.5	831734506.5	27488078.5	cela1_sika_10_27002179	cela1_red_10_27973978
LG12.c.341.20	Male	-884.662294550169	-884.565744493477	12	341	20	360	12117	831248607	24726571	27002179	12136	832220406	25698370	27973978	971799	0.193100113385754	0.660348848301021	25212470.5	831734506.5	27488078.5	cela1_sika_10_27002179	cela1_red_10_27973978
LG12.c.341.20	Female	-1896.56712508237	-1896.56175253087	12	341	20	360	12117	831248607	24726571	27002179	12136	832220406	25698370	27973978	971799	0.0107451030035008	0.917440291011352	25212470.5	831734506.5	27488078.5	cela1_sika_10_27002179	cela1_red_10_27973978
LG12.c.342.20	Both	-2818.06001405668	-2817.93867732491	12	342	20	361	12118	831265275	24743239	27018847	12137	832255285	25733249	28008857	990010	0.242673463552819	0.622281831601447	25238244	831760280	27513852	cela1_red_10_27018847	cela1_red_10_28008857
LG12.c.342.20	Male	-884.662478745088	-884.469555357506	12	342	20	361	12118	831265275	24743239	27018847	12137	832255285	25733249	28008857	990010	0.385846775164964	0.534490632267156	25238244	831760280	27513852	cela1_red_10_27018847	cela1_red_10_28008857
LG12.c.342.20	Female	-1896.56618067304	-1896.56618108969	12	342	20	361	12118	831265275	24743239	27018847	12137	832255285	25733249	28008857	990010	-8.33298599900445e-07	1	25238244	831760280	27513852	cela1_red_10_27018847	cela1_red_10_28008857
LG12.c.343.20	Both	-2818.06001561938	-2817.9567047886	12	343	20	362	12119	831326347	24804311	27079919	12138	832345265	25823229	28098837	1018918	0.206621661551253	0.649428296270808	25313770	831835806	27589378	cela1_red_10_27079919	cela1_red_10_28098837
LG12.c.343.20	Male	-884.662322674105	-884.492833544041	12	343	20	362	12119	831326347	24804311	27079919	12138	832345265	25823229	28098837	1018918	0.338978260127305	0.560419584057201	25313770	831835806	27589378	cela1_red_10_27079919	cela1_red_10_28098837
LG12.c.343.20	Female	-1896.56642335361	-1896.56642343075	12	343	20	362	12119	831326347	24804311	27079919	12138	832345265	25823229	28098837	1018918	-1.54298049892532e-07	1	25313770	831835806	27589378	cela1_red_10_27079919	cela1_red_10_28098837
LG12.c.344.20	Both	-2818.0599773872	-2817.95934802729	12	344	20	363	12120	831353467	24831431	27107039	12139	832426099	25904063	28179671	1072632	0.201258719813268	0.653706756272719	25367747	831889783	27643355	cela1_red_10_27107039	cela1_red_10_28179671
LG12.c.344.20	Male	-884.66222769382	-884.456567307502	12	344	20	363	12120	831353467	24831431	27107039	12139	832426099	25904063	28179671	1072632	0.411320772636373	0.5212998934916	25367747	831889783	27643355	cela1_red_10_27107039	cela1_red_10_28179671
LG12.c.344.20	Female	-1896.56667695208	-1896.56626451974	12	344	20	363	12120	831353467	24831431	27107039	12139	832426099	25904063	28179671	1072632	0.000824864687729132	0.97708754025022	25367747	831889783	27643355	cela1_red_10_27107039	cela1_red_10_28179671
LG12.c.345.20	Both	-2818.0606460571	-2817.95467754044	12	345	20	364	12121	831399885	24877849	27153457	12140	832510063	25988027	28263635	1110178	0.211937033312097	0.645253395128889	25432938	831954974	27708546	cela1_red_10_27153457	cela1_red_10_28263635
LG12.c.345.20	Male	-884.662714253718	-884.39799710078	12	345	20	364	12121	831399885	24877849	27153457	12140	832510063	25988027	28263635	1110178	0.529434305876293	0.466844786149781	25432938	831954974	27708546	cela1_red_10_27153457	cela1_red_10_28263635
LG12.c.345.20	Female	-1896.56744776055	-1896.55707196237	12	345	20	364	12121	831399885	24877849	27153457	12140	832510063	25988027	28263635	1110178	0.0207515963538754	0.885457714868233	25432938	831954974	27708546	cela1_red_10_27153457	cela1_red_10_28263635
LG12.c.346.20	Both	-2818.0609731693	-2817.97791170865	12	346	20	365	12122	831474423	24952387	27227995	12141	832510138	25988102	28263710	1035715	0.166122921287752	0.683580730481052	25470244.5	831992280.5	27745852.5	cela1_red_10_27227995	cela1_red_10_28263710
LG12.c.346.20	Male	-884.662689277127	-884.401415971644	12	346	20	365	12122	831474423	24952387	27227995	12141	832510138	25988102	28263710	1035715	0.522546610966629	0.469757387293144	25470244.5	831992280.5	27745852.5	cela1_red_10_27227995	cela1_red_10_28263710
LG12.c.346.20	Female	-1896.56775021194	-1896.55566470738	12	346	20	365	12122	831474423	24952387	27227995	12141	832510138	25988102	28263710	1035715	0.0241710091331697	0.87645057918968	25470244.5	831992280.5	27745852.5	cela1_red_10_27227995	cela1_red_10_28263710
LG12.c.347.20	Both	-2818.07902987617	-2816.26413849838	12	347	20	366	12123	831521901	24999865	27275473	12142	832696782	26174746	28450354	1174881	3.62978275557725	0.0567542243190808	25587305.5	832109341.5	27862913.5	cela1_red_10_27275473	cela1_red_10_28450354
LG12.c.347.20	Male	-884.664402151205	-883.748134265394	12	347	20	366	12123	831521901	24999865	27275473	12142	832696782	26174746	28450354	1174881	1.83253577162054	0.175828326198733	25587305.5	832109341.5	27862913.5	cela1_red_10_27275473	cela1_red_10_28450354
LG12.c.347.20	Female	-1896.57357065314	-1896.14741337737	12	347	20	366	12123	831521901	24999865	27275473	12142	832696782	26174746	28450354	1174881	0.852314551537802	0.35589838596506	25587305.5	832109341.5	27862913.5	cela1_red_10_27275473	cela1_red_10_28450354
LG12.c.348.20	Both	-2818.08523736738	-2815.26462517752	12	348	20	367	12124	831581161	25059125	27334733	12143	832754748	26232712	28508320	1173587	5.64122437971946	0.0175429519253728	25645918.5	832167954.5	27921526.5	cela1_red_10_27334733	cela1_red_10_28508320
LG12.c.348.20	Male	-884.667131789414	-882.103086142964	12	348	20	367	12124	831581161	25059125	27334733	12143	832754748	26232712	28508320	1173587	5.12809129290054	0.0235416022477555	25645918.5	832167954.5	27921526.5	cela1_red_10_27334733	cela1_red_10_28508320
LG12.c.348.20	Female	-1896.57355289154	-1896.16833017162	12	348	20	367	12124	831581161	25059125	27334733	12143	832754748	26232712	28508320	1173587	0.810445439835803	0.367988589044648	25645918.5	832167954.5	27921526.5	cela1_red_10_27334733	cela1_red_10_28508320
LG12.c.349.20	Both	-2818.08579484135	-2815.22930085233	12	349	20	368	12125	831714008	25191972	27467580	12144	832795099	26273063	28548671	1081091	5.71298797804957	0.0168398529014532	25732517.5	832254553.5	28008125.5	cela1_red_10_27467580	cela1_red_10_28548671
LG12.c.349.20	Male	-884.667144777011	-881.958321485266	12	349	20	368	12125	831714008	25191972	27467580	12144	832795099	26273063	28548671	1081091	5.41764658348916	0.0199342117749763	25732517.5	832254553.5	28008125.5	cela1_red_10_27467580	cela1_red_10_28548671
LG12.c.349.20	Female	-1896.57426238361	-1896.08402822927	12	349	20	368	12125	831714008	25191972	27467580	12144	832795099	26273063	28548671	1081091	0.980468308694526	0.322083215637804	25732517.5	832254553.5	28008125.5	cela1_red_10_27467580	cela1_red_10_28548671
LG12.c.350.20	Both	-2818.08196917692	-2816.07981106902	12	350	20	369	12126	831746398	25224362	27499970	12145	832939448	26417412	28693020	1193050	4.00431621578264	0.0453839025749188	25820887	832342923	28096495	cela1_red_10_27499970	cela1_red_10_28693020
LG12.c.350.20	Male	-884.667059675815	-881.964270279124	12	350	20	369	12126	831746398	25224362	27499970	12145	832939448	26417412	28693020	1193050	5.40557879338212	0.0200724915505426	25820887	832342923	28096495	cela1_red_10_27499970	cela1_red_10_28693020
LG12.c.350.20	Female	-1896.57070333957	-1896.45136579278	12	350	20	369	12126	831746398	25224362	27499970	12145	832939448	26417412	28693020	1193050	0.238675093580696	0.625164673778765	25820887	832342923	28096495	cela1_red_10_27499970	cela1_red_10_28693020
LG12.c.351.20	Both	-2818.08073815185	-2816.35667043647	12	351	20	370	12127	831804151	25282115	27557723	12146	833081398	26559362	28834970	1277247	3.44813543076907	0.06332316716186	25920738.5	832442774.5	28196346.5	cela1_red_10_27557723	cela1_red_10_28834970
LG12.c.351.20	Male	-884.667055163283	-881.98443522797	12	351	20	370	12127	831804151	25282115	27557723	12146	833081398	26559362	28834970	1277247	5.36523987062492	0.0205419628870892	25920738.5	832442774.5	28196346.5	cela1_red_10_27557723	cela1_red_10_28834970
LG12.c.351.20	Female	-1896.57016820381	-1896.4884868331	12	351	20	370	12127	831804151	25282115	27557723	12146	833081398	26559362	28834970	1277247	0.163362741414403	0.686079205429118	25920738.5	832442774.5	28196346.5	cela1_red_10_27557723	cela1_red_10_28834970
LG12.c.352.20	Both	-2818.08036435166	-2816.30892798078	12	352	20	371	12128	831815770	25293734	27569342	12147	833177823	26655787	28931395	1362053	3.54287274176932	0.059801802936148	25974760.5	832496796.5	28250368.5	cela1_red_10_27569342	cela1_red_10_28931395
LG12.c.352.20	Male	-884.668319757209	-881.410553512715	12	352	20	371	12128	831815770	25293734	27569342	12147	833177823	26655787	28931395	1362053	6.51553248898767	0.0106936297432088	25974760.5	832496796.5	28250368.5	cela1_red_10_27569342	cela1_red_10_28931395
LG12.c.352.20	Female	-1896.56976390788	-1896.49542970667	12	352	20	371	12128	831815770	25293734	27569342	12147	833177823	26655787	28931395	1362053	0.148668402420299	0.699811142170774	25974760.5	832496796.5	28250368.5	cela1_red_10_27569342	cela1_red_10_28931395
LG12.c.353.20	Both	-2818.09137804033	-2815.47973973884	12	353	20	372	12129	831883960	25361924	27637532	12148	833247707	26725671	29001279	1363747	5.2232766029847	0.0222865204042035	26043797.5	832565833.5	28319405.5	cela1_sika_10_27637532	cela1_red_10_29001279
LG12.c.353.20	Male	-884.669489201048	-881.263947760937	12	353	20	372	12129	831883960	25361924	27637532	12148	833247707	26725671	29001279	1363747	6.81108288022278	0.00905938095780201	26043797.5	832565833.5	28319405.5	cela1_sika_10_27637532	cela1_red_10_29001279
LG12.c.353.20	Female	-1896.57548267218	-1896.12179157097	12	353	20	372	12129	831883960	25361924	27637532	12148	833247707	26725671	29001279	1363747	0.907382202415647	0.340809952834418	26043797.5	832565833.5	28319405.5	cela1_sika_10_27637532	cela1_red_10_29001279
LG12.c.354.20	Both	-2818.09109059604	-2815.45026224208	12	354	20	373	12130	831932150	25410114	27685722	12149	833333493	26811457	29087065	1401343	5.28165670791896	0.0215512321834821	26110785.5	832632821.5	28386393.5	cela1_red_10_27685722	cela1_red_10_29087065
LG12.c.354.20	Male	-884.669722882895	-881.327603532946	12	354	20	373	12130	831932150	25410114	27685722	12149	833333493	26811457	29087065	1401343	6.6842386998967	0.00972690547524058	26110785.5	832632821.5	28386393.5	cela1_red_10_27685722	cela1_red_10_29087065
LG12.c.354.20	Female	-1896.57524942651	-1896.10600396255	12	354	20	373	12130	831932150	25410114	27685722	12149	833333493	26811457	29087065	1401343	0.938490927930616	0.332666238775866	26110785.5	832632821.5	28386393.5	cela1_red_10_27685722	cela1_red_10_29087065
LG12.c.355.20	Both	-2818.09543442372	-2815.73509871317	12	355	20	374	12131	832144120	25622084	27897692	12150	833402530	26880494	29156102	1258410	4.72067142109245	0.0298021042729494	26251289	832773325	28526897	cela1_red_10_27897692	cela1_red_10_29156102
LG12.c.355.20	Male	-884.66978644251	-882.090183468324	12	355	20	374	12131	832144120	25622084	27897692	12150	833402530	26880494	29156102	1258410	5.15920594837303	0.0231234668943994	26251289	832773325	28526897	cela1_red_10_27897692	cela1_red_10_29156102
LG12.c.355.20	Female	-1896.576914073	-1896.04635506529	12	355	20	374	12131	832144120	25622084	27897692	12150	833402530	26880494	29156102	1258410	1.06111801541647	0.30296033004116	26251289	832773325	28526897	cela1_red_10_27897692	cela1_red_10_29156102
LG12.c.356.20	Both	-2818.09944777925	-2815.5337101971	12	356	20	375	12132	832145019	25622983	27898591	12151	833488128	26966092	29241700	1343109	5.13147516431127	0.0234957504663268	26294537.5	832816573.5	28570145.5	cela1_sika_10_27898591	cela1_red_10_29241700
LG12.c.356.20	Male	-884.671465852495	-881.793508627457	12	356	20	375	12132	832145019	25622983	27898591	12151	833488128	26966092	29241700	1343109	5.75591445007603	0.0164332400733505	26294537.5	832816573.5	28570145.5	cela1_sika_10_27898591	cela1_red_10_29241700
LG12.c.356.20	Female	-1896.57787409472	-1895.98051759194	12	356	20	375	12132	832145019	25622983	27898591	12151	833488128	26966092	29241700	1343109	1.19471300556597	0.274380944509484	26294537.5	832816573.5	28570145.5	cela1_sika_10_27898591	cela1_red_10_29241700
LG12.c.357.20	Both	-2818.09842216738	-2815.444107619	12	357	20	376	12133	832148597	25626561	27902169	12152	833547929	27025893	29301501	1399332	5.30862909675398	0.0212200478001648	26326227	832848263	28601835	cela1_red_10_27902169	cela1_red_10_29301501
LG12.c.357.20	Male	-884.670660561133	-881.908042627618	12	357	20	376	12133	832148597	25626561	27902169	12152	833547929	27025893	29301501	1399332	5.52523586703091	0.0187440757532821	26326227	832848263	28601835	cela1_red_10_27902169	cela1_red_10_29301501
LG12.c.357.20	Female	-1896.57733456902	-1895.96937715419	12	357	20	376	12133	832148597	25626561	27902169	12152	833547929	27025893	29301501	1399332	1.21591482964959	0.270163860792616	26326227	832848263	28601835	cela1_red_10_27902169	cela1_red_10_29301501
LG12.c.358.20	Both	-2818.09665783916	-2815.40922039334	12	358	20	377	12134	832150602	25628566	27904174	12153	833630856	27108820	29384428	1480254	5.3748748916496	0.0204288060641769	26368693	832890729	28644301	cela1_sika_10_27904174	cela1_red_10_29384428
LG12.c.358.20	Male	-884.669849610865	-882.139918022274	12	358	20	377	12134	832150602	25628566	27904174	12153	833630856	27108820	29384428	1480254	5.05986317718157	0.0244861710624584	26368693	832890729	28644301	cela1_sika_10_27904174	cela1_red_10_29384428
LG12.c.358.20	Female	-1896.57610259636	-1896.00761119202	12	358	20	377	12134	832150602	25628566	27904174	12153	833630856	27108820	29384428	1480254	1.13698280867811	0.286290779117244	26368693	832890729	28644301	cela1_sika_10_27904174	cela1_red_10_29384428
LG12.c.359.20	Both	-2818.10410966412	-2815.27896859352	12	359	20	378	12135	832193180	25671144	27946752	12154	833822955	27300919	29576527	1629775	5.65028214118684	0.0174525639221746	26486031.5	833008067.5	28761639.5	cela1_red_10_27946752	cela1_red_10_29576527
LG12.c.359.20	Male	-884.671115323576	-881.931734913544	12	359	20	378	12135	832193180	25671144	27946752	12154	833822955	27300919	29576527	1629775	5.47876082006474	0.0192489000012663	26486031.5	833008067.5	28761639.5	cela1_red_10_27946752	cela1_red_10_29576527
LG12.c.359.20	Female	-1896.5774509713	-1895.96473204112	12	359	20	378	12135	832193180	25671144	27946752	12154	833822955	27300919	29576527	1629775	1.22543786036658	0.268296103698044	26486031.5	833008067.5	28761639.5	cela1_red_10_27946752	cela1_red_10_29576527
LG12.c.360.20	Both	-2818.10355010245	-2815.24272317136	12	360	20	379	12136	832220406	25698370	27973978	12155	833860763	27338727	29614335	1640357	5.72165386218239	0.0167569391271649	26518548.5	833040584.5	28794156.5	cela1_red_10_27973978	cela1_red_10_29614335
LG12.c.360.20	Male	-884.671352776886	-881.831689961967	12	360	20	379	12136	832220406	25698370	27973978	12155	833860763	27338727	29614335	1640357	5.67932562983924	0.0171659644450057	26518548.5	833040584.5	28794156.5	cela1_red_10_27973978	cela1_red_10_29614335
LG12.c.360.20	Female	-1896.57743996342	-1895.92748384679	12	360	20	379	12136	832220406	25698370	27973978	12155	833860763	27338727	29614335	1640357	1.29991223326397	0.254229255828388	26518548.5	833040584.5	28794156.5	cela1_red_10_27973978	cela1_red_10_29614335
LG12.c.361.20	Both	-2818.11115017201	-2814.91569882759	12	361	20	380	12137	832255285	25733249	28008857	12156	833927484	27405448	29681056	1672199	6.39090268883047	0.0114706682121424	26569348.5	833091384.5	28844956.5	cela1_red_10_28008857	cela1_red_10_29681056
LG12.c.361.20	Male	-884.673230064242	-881.567455880285	12	361	20	380	12137	832255285	25733249	28008857	12156	833927484	27405448	29681056	1672199	6.21154836791425	0.0126919569629497	26569348.5	833091384.5	28844956.5	cela1_red_10_28008857	cela1_red_10_29681056
LG12.c.361.20	Female	-1896.57921803274	-1895.79245732621	12	361	20	380	12137	832255285	25733249	28008857	12156	833927484	27405448	29681056	1672199	1.57352141305364	0.209696355266994	26569348.5	833091384.5	28844956.5	cela1_red_10_28008857	cela1_red_10_29681056
LG12.c.362.20	Both	-2818.11288742153	-2814.87199051043	12	362	20	381	12138	832345265	25823229	28098837	12157	834014988	27492952	29768560	1669723	6.48179382219951	0.0108984940485904	26658090.5	833180126.5	28933698.5	cela1_red_10_28098837	cela1_red_10_29768560
LG12.c.362.20	Male	-884.674034306349	-881.480875081502	12	362	20	381	12138	832345265	25823229	28098837	12157	834014988	27492952	29768560	1669723	6.38631844969473	0.0115003305307634	26658090.5	833180126.5	28933698.5	cela1_red_10_28098837	cela1_red_10_29768560
LG12.c.362.20	Female	-1896.58051447862	-1895.70588658832	12	362	20	381	12138	832345265	25823229	28098837	12157	834014988	27492952	29768560	1669723	1.74925578060629	0.185970318464122	26658090.5	833180126.5	28933698.5	cela1_red_10_28098837	cela1_red_10_29768560
LG12.c.363.20	Both	-2818.11456391149	-2814.55301736385	12	363	20	382	12139	832426099	25904063	28179671	12158	834073348	27551312	29826920	1647249	7.123093095277	0.00760973073263782	26727687.5	833249723.5	29003295.5	cela1_red_10_28179671	cela1_red_10_29826920
LG12.c.363.20	Male	-884.674169213878	-881.439589717339	12	363	20	382	12139	832426099	25904063	28179671	12158	834073348	27551312	29826920	1647249	6.46915899307896	0.0109762462576669	26727687.5	833249723.5	29003295.5	cela1_red_10_28179671	cela1_red_10_29826920
LG12.c.363.20	Female	-1896.5808257786	-1895.60646171321	12	363	20	382	12139	832426099	25904063	28179671	12158	834073348	27551312	29826920	1647249	1.94872813077745	0.162723972694495	26727687.5	833249723.5	29003295.5	cela1_red_10_28179671	cela1_red_10_29826920
LG12.c.364.20	Both	-2818.12413317402	-2813.90552406785	12	364	20	383	12140	832510063	25988027	28263635	12159	834108532	27586496	29862104	1598469	8.4372182123534	0.00367618173022466	26787261.5	833309297.5	29062869.5	cela1_red_10_28263635	cela1_red_10_29862104
LG12.c.364.20	Male	-884.67530447716	-881.287250071132	12	364	20	383	12140	832510063	25988027	28263635	12159	834108532	27586496	29862104	1598469	6.77610881205715	0.00923860789890452	26787261.5	833309297.5	29062869.5	cela1_red_10_28263635	cela1_red_10_29862104
LG12.c.364.20	Female	-1896.58540130985	-1895.15483288708	12	364	20	383	12140	832510063	25988027	28263635	12159	834108532	27586496	29862104	1598469	2.86113684554357	0.0907433449160848	26787261.5	833309297.5	29062869.5	cela1_red_10_28263635	cela1_red_10_29862104
LG12.c.365.20	Both	-2818.1209309554	-2813.91795486032	12	365	20	384	12141	832510138	25988102	28263710	12160	834179543	27657507	29933115	1669405	8.40595219017268	0.00373994453947846	26822804.5	833344840.5	29098412.5	cela1_red_10_28263710	cela1_red_10_29933115
LG12.c.365.20	Male	-884.674956129978	-880.744599294285	12	365	20	384	12141	832510138	25988102	28263710	12160	834179543	27657507	29933115	1669405	7.86071367138697	0.00505204475607457	26822804.5	833344840.5	29098412.5	cela1_red_10_28263710	cela1_red_10_29933115
LG12.c.365.20	Female	-1896.58411200503	-1895.14980403822	12	365	20	384	12141	832510138	25988102	28263710	12160	834179543	27657507	29933115	1669405	2.86861593362573	0.0903225153074408	26822804.5	833344840.5	29098412.5	cela1_red_10_28263710	cela1_red_10_29933115
LG12.c.366.20	Both	-2818.11987659467	-2814.20792761002	12	366	20	385	12142	832696782	26174746	28450354	12161	834198236	27676200	29951808	1501454	7.82389796929601	0.00515598750272817	26925473	833447509	29201081	cela1_red_10_28450354	cela1_red_10_29951808
LG12.c.366.20	Male	-884.674998697466	-880.78451553076	12	366	20	385	12142	832696782	26174746	28450354	12161	834198236	27676200	29951808	1501454	7.78096633341193	0.00527995469775411	26925473	833447509	29201081	cela1_red_10_28450354	cela1_red_10_29951808
LG12.c.366.20	Female	-1896.58345369111	-1895.30021394004	12	366	20	385	12142	832696782	26174746	28450354	12161	834198236	27676200	29951808	1501454	2.56647950213801	0.109150398650692	26925473	833447509	29201081	cela1_red_10_28450354	cela1_red_10_29951808
LG12.c.367.20	Both	-2818.10337627885	-2815.23606617478	12	367	20	386	12143	832754748	26232712	28508320	12162	834230597	27708561	29984169	1475849	5.73462020812713	0.016633664722611	26970636.5	833492672.5	29246244.5	cela1_red_10_28508320	cela1_red_10_29984169
LG12.c.367.20	Male	-884.673227139344	-881.289767198699	12	367	20	386	12143	832754748	26232712	28508320	12162	834230597	27708561	29984169	1475849	6.76691988128937	0.00928629676608228	26970636.5	833492672.5	29246244.5	cela1_red_10_28508320	cela1_red_10_29984169
LG12.c.367.20	Female	-1896.57815198111	-1895.80000820908	12	367	20	386	12143	832754748	26232712	28508320	12162	834230597	27708561	29984169	1475849	1.5562875440678	0.212209624143533	26970636.5	833492672.5	29246244.5	cela1_red_10_28508320	cela1_red_10_29984169
LG12.c.368.20	Both	-2818.10016238348	-2815.42467403987	12	368	20	387	12144	832795099	26273063	28548671	12163	834310279	27788243	30063851	1515180	5.35097668721937	0.0207106662423597	27030653	833552689	29306261	cela1_red_10_28548671	cela1_red_10_30063851
LG12.c.368.20	Male	-884.672030773112	-881.652496858715	12	368	20	387	12144	832795099	26273063	28548671	12163	834310279	27788243	30063851	1515180	6.03906782879312	0.0139926706865667	27030653	833552689	29306261	cela1_red_10_28548671	cela1_red_10_30063851
LG12.c.368.20	Female	-1896.57759587687	-1895.81820804461	12	368	20	387	12144	832795099	26273063	28548671	12163	834310279	27788243	30063851	1515180	1.51877566452686	0.217804865754485	27030653	833552689	29306261	cela1_red_10_28548671	cela1_red_10_30063851
LG12.c.369.20	Both	-2818.1019369738	-2815.22176015236	12	369	20	388	12145	832939448	26417412	28693020	12164	834338095	27816059	30091667	1398647	5.7603536428669	0.0163917723307703	27116735.5	833638771.5	29392343.5	cela1_red_10_28693020	cela1_red_10_30091667
LG12.c.369.20	Male	-884.671904436094	-881.704238007089	12	369	20	388	12145	832939448	26417412	28693020	12164	834338095	27816059	30091667	1398647	5.93533285801141	0.0148402655963789	27116735.5	833638771.5	29392343.5	cela1_red_10_28693020	cela1_red_10_30091667
LG12.c.369.20	Female	-1896.57819403417	-1895.65251042719	12	369	20	388	12145	832939448	26417412	28693020	12164	834338095	27816059	30091667	1398647	1.85136721395338	0.173624462983469	27116735.5	833638771.5	29392343.5	cela1_red_10_28693020	cela1_red_10_30091667
LG12.c.370.20	Both	-2818.10386099284	-2815.34448604585	12	370	20	389	12146	833081398	26559362	28834970	12165	834378322	27856286	30131894	1296924	5.51874989397584	0.0188136986428942	27207824	833729860	29483432	cela1_red_10_28834970	cela1_red_10_30131894
LG12.c.370.20	Male	-884.673490434094	-881.57723420775	12	370	20	389	12146	833081398	26559362	28834970	12165	834378322	27856286	30131894	1296924	6.19251245268856	0.0128291921207685	27207824	833729860	29483432	cela1_red_10_28834970	cela1_red_10_30131894
LG12.c.370.20	Female	-1896.57832280712	-1895.71961205685	12	370	20	389	12146	833081398	26559362	28834970	12165	834378322	27856286	30131894	1296924	1.71742150055479	0.190025293063933	27207824	833729860	29483432	cela1_red_10_28834970	cela1_red_10_30131894
LG12.c.371.20	Both	-2818.10599314552	-2815.39997772496	12	371	20	390	12147	833177823	26655787	28931395	12166	834437182	27915146	30190754	1259359	5.41203084112112	0.0199984372614047	27285466.5	833807502.5	29561074.5	cela1_red_10_28931395	cela1_red_10_30190754
LG12.c.371.20	Male	-884.674689847376	-881.411566387917	12	371	20	390	12147	833177823	26655787	28931395	12166	834437182	27915146	30190754	1259359	6.5262469189197	0.0106294004393261	27285466.5	833807502.5	29561074.5	cela1_red_10_28931395	cela1_red_10_30190754
LG12.c.371.20	Female	-1896.5783162702	-1895.77749080297	12	371	20	390	12147	833177823	26655787	28931395	12166	834437182	27915146	30190754	1259359	1.60165093446494	0.205669406097265	27285466.5	833807502.5	29561074.5	cela1_red_10_28931395	cela1_red_10_30190754
LG12.c.372.20	Both	-2818.10926808553	-2815.47079922756	12	372	20	391	12148	833247707	26725671	29001279	12167	834600139	28078103	30353711	1352432	5.27693771593749	0.0216097228506337	27401887	833923923	29677495	cela1_red_10_29001279	cela1_red_10_30353711
LG12.c.372.20	Male	-884.675262785561	-881.282737582779	12	372	20	391	12148	833247707	26725671	29001279	12167	834600139	28078103	30353711	1352432	6.78505040556365	0.00919244342224212	27401887	833923923	29677495	cela1_red_10_29001279	cela1_red_10_30353711
LG12.c.372.20	Female	-1896.57877945209	-1895.88276195284	12	372	20	391	12148	833247707	26725671	29001279	12167	834600139	28078103	30353711	1352432	1.39203499849691	0.238061737553945	27401887	833923923	29677495	cela1_red_10_29001279	cela1_red_10_30353711
LG12.c.373.20	Both	-2818.10100518236	-2816.11405638424	12	373	20	392	12149	833333493	26811457	29087065	12168	834666628	28144592	30420200	1333135	3.9738975962473	0.0462106926303565	27478024.5	834000060.5	29753632.5	cela1_red_10_29087065	cela1_red_10_30420200
LG12.c.373.20	Male	-884.674240743676	-881.253900714955	12	373	20	392	12149	833333493	26811457	29087065	12168	834666628	28144592	30420200	1333135	6.84068005744257	0.00891049112621034	27478024.5	834000060.5	29753632.5	cela1_red_10_29087065	cela1_red_10_30420200
LG12.c.373.20	Female	-1896.57484576358	-1896.28842056555	12	373	20	392	12149	833333493	26811457	29087065	12168	834666628	28144592	30420200	1333135	0.572850396074045	0.449128462938242	27478024.5	834000060.5	29753632.5	cela1_red_10_29087065	cela1_red_10_30420200
LG12.c.374.20	Both	-2818.10140889312	-2816.11346050799	12	374	20	393	12150	833402530	26880494	29156102	12169	834857318	28335282	30610890	1454788	3.97589677027281	0.0461558700098532	27607888	834129924	29883496	cela1_red_10_29156102	cela1_red_10_30610890
LG12.c.374.20	Male	-884.673090069851	-881.243975684279	12	374	20	393	12150	833402530	26880494	29156102	12169	834857318	28335282	30610890	1454788	6.8582287711447	0.00882339694798917	27607888	834129924	29883496	cela1_red_10_29156102	cela1_red_10_30610890
LG12.c.374.20	Female	-1896.57613806649	-1896.2465662192	12	374	20	393	12150	833402530	26880494	29156102	12169	834857318	28335282	30610890	1454788	0.659143694581417	0.41686241413063	27607888	834129924	29883496	cela1_red_10_29156102	cela1_red_10_30610890
LG12.c.375.20	Both	-2818.09793757225	-2816.13572439925	12	375	20	394	12151	833488128	26966092	29241700	12170	834907981	28385945	30661553	1419853	3.92442634599774	0.0475894240139745	27676018.5	834198054.5	29951626.5	cela1_red_10_29241700	cela1_red_10_30661553
LG12.c.375.20	Male	-884.672946046777	-881.206260932027	12	375	20	394	12151	833488128	26966092	29241700	12170	834907981	28385945	30661553	1419853	6.93337022949913	0.00846021178399714	27676018.5	834198054.5	29951626.5	cela1_red_10_29241700	cela1_red_10_30661553
LG12.c.375.20	Female	-1896.57482866035	-1896.30315175321	12	375	20	394	12151	833488128	26966092	29241700	12170	834907981	28385945	30661553	1419853	0.543353814285183	0.461046111020356	27676018.5	834198054.5	29951626.5	cela1_red_10_29241700	cela1_red_10_30661553
LG12.c.376.20	Both	-2818.09809799252	-2816.09956747439	12	376	20	395	12152	833547929	27025893	29301501	12171	834981606	28459570	30735178	1433677	3.99706103626886	0.0455796755575456	27742731.5	834264767.5	30018339.5	cela1_red_10_29301501	cela1_red_10_30735178
LG12.c.376.20	Male	-884.671756019849	-881.381890763542	12	376	20	395	12152	833547929	27025893	29301501	12171	834981606	28459570	30735178	1433677	6.57973051261479	0.010314650749264	27742731.5	834264767.5	30018339.5	cela1_red_10_29301501	cela1_red_10_30735178
LG12.c.376.20	Female	-1896.57511175209	-1896.29473885342	12	376	20	395	12152	833547929	27025893	29301501	12171	834981606	28459570	30735178	1433677	0.560745797356049	0.453959905489465	27742731.5	834264767.5	30018339.5	cela1_red_10_29301501	cela1_red_10_30735178
LG12.c.377.20	Both	-2818.09620526703	-2816.28679805059	12	377	20	396	12153	833630856	27108820	29384428	12172	835164277	28642241	30917849	1533421	3.61881443289076	0.0571295712145496	27875530.5	834397566.5	30151138.5	cela1_red_10_29384428	cela1_red_10_30917849
LG12.c.377.20	Male	-884.671602275961	-881.348463858099	12	377	20	396	12153	833630856	27108820	29384428	12172	835164277	28642241	30917849	1533421	6.64627683572394	0.00993632429287861	27875530.5	834397566.5	30151138.5	cela1_red_10_29384428	cela1_red_10_30917849
LG12.c.377.20	Female	-1896.57460575807	-1896.33516538493	12	377	20	396	12153	833630856	27108820	29384428	12172	835164277	28642241	30917849	1533421	0.478880746280993	0.488929730405293	27875530.5	834397566.5	30151138.5	cela1_red_10_29384428	cela1_red_10_30917849
LG12.c.378.20	Both	-2818.1056799722	-2815.94081984962	12	378	20	397	12154	833822955	27300919	29576527	12173	835218332	28696296	30971904	1395377	4.32972024517039	0.0374524008879011	27998607.5	834520643.5	30274215.5	cela1_red_10_29576527	cela1_red_10_30971904
LG12.c.378.20	Male	-884.672500885997	-881.212106882343	12	378	20	397	12154	833822955	27300919	29576527	12173	835218332	28696296	30971904	1395377	6.9207880073086	0.00851994242718368	27998607.5	834520643.5	30274215.5	cela1_red_10_29576527	cela1_red_10_30971904
LG12.c.378.20	Female	-1896.57790359849	-1896.19890928553	12	378	20	397	12154	833822955	27300919	29576527	12173	835218332	28696296	30971904	1395377	0.757988625927283	0.383958710886619	27998607.5	834520643.5	30274215.5	cela1_red_10_29576527	cela1_red_10_30971904
LG12.c.379.20	Both	-2818.09887029162	-2816.29433161009	12	379	20	398	12155	833860763	27338727	29614335	12174	835249446	28727410	31003018	1388683	3.6090773630649	0.0574649919531767	28033068.5	834555104.5	30308676.5	cela1_red_10_29614335	cela1_red_10_31003018
LG12.c.379.20	Male	-884.672561090011	-881.397627663182	12	379	20	398	12155	833860763	27338727	29614335	12174	835249446	28727410	31003018	1388683	6.5498668536577	0.0104892008082911	28033068.5	834555104.5	30308676.5	cela1_red_10_29614335	cela1_red_10_31003018
LG12.c.379.20	Female	-1896.57615273473	-1896.28696554384	12	379	20	398	12155	833860763	27338727	29614335	12174	835249446	28727410	31003018	1388683	0.578374381777394	0.44695021771223	28033068.5	834555104.5	30308676.5	cela1_red_10_29614335	cela1_red_10_31003018
LG12.c.380.20	Both	-2818.09913304469	-2816.35410168122	12	380	20	399	12156	833927484	27405448	29681056	12175	835293948	28771912	31047520	1366464	3.49006272694623	0.061738245516674	28088680	834610716	30364288	cela1_red_10_29681056	cela1_red_10_31047520
LG12.c.380.20	Male	-884.672306545031	-881.526729140424	12	380	20	399	12156	833927484	27405448	29681056	12175	835293948	28771912	31047520	1366464	6.29115480921359	0.0121341966558953	28088680	834610716	30364288	cela1_red_10_29681056	cela1_red_10_31047520
LG12.c.380.20	Female	-1896.57598215395	-1896.31741608513	12	380	20	399	12156	833927484	27405448	29681056	12175	835293948	28771912	31047520	1366464	0.517132137630597	0.472067600854445	28088680	834610716	30364288	cela1_red_10_29681056	cela1_red_10_31047520
LG12.c.381.20	Both	-2818.09147174811	-2816.5398914996	12	381	20	400	12157	834014988	27492952	29768560	12176	835377835	28855799	31131407	1362847	3.10316049702033	0.0781404582580594	28174375.5	834696411.5	30449983.5	cela1_red_10_29768560	cela1_red_10_31131407
LG12.c.381.20	Male	-884.67066250542	-881.853827580765	12	381	20	400	12157	834014988	27492952	29768560	12176	835377835	28855799	31131407	1362847	5.63366984930872	0.0176187085448081	28174375.5	834696411.5	30449983.5	cela1_red_10_29768560	cela1_red_10_31131407
LG12.c.381.20	Female	-1896.57402187667	-1896.37662059198	12	381	20	400	12157	834014988	27492952	29768560	12176	835377835	28855799	31131407	1362847	0.394802569383501	0.529785708277398	28174375.5	834696411.5	30449983.5	cela1_red_10_29768560	cela1_red_10_31131407
LG12.c.382.20	Both	-2818.08775330747	-2816.60328278239	12	382	20	401	12158	834073348	27551312	29826920	12177	835418864	28896828	31172436	1345516	2.96894105017236	0.0848773979539795	28224070	834746106	30499678	cela1_red_10_29826920	cela1_red_10_31172436
LG12.c.382.20	Male	-884.669687383945	-882.100920193123	12	382	20	401	12158	834073348	27551312	29826920	12177	835418864	28896828	31172436	1345516	5.13753438164531	0.023413878726477	28224070	834746106	30499678	cela1_red_10_29826920	cela1_red_10_31172436
LG12.c.382.20	Female	-1896.57308852326	-1896.3743548613	12	382	20	401	12158	834073348	27551312	29826920	12177	835418864	28896828	31172436	1345516	0.397467323913133	0.528400143310067	28224070	834746106	30499678	cela1_red_10_29826920	cela1_red_10_31172436
LG12.c.383.20	Both	-2818.08759239346	-2816.72522162063	12	383	20	402	12159	834108532	27586496	29862104	12178	835469777	28947741	31223349	1361245	2.72474154565953	0.0988041142744125	28267118.5	834789154.5	30542726.5	cela1_red_10_29862104	cela1_red_10_31223349
LG12.c.383.20	Male	-884.670012619611	-882.279056329873	12	383	20	402	12159	834108532	27586496	29862104	12178	835469777	28947741	31223349	1361245	4.78191257947697	0.0287601611408244	28267118.5	834789154.5	30542726.5	cela1_red_10_29862104	cela1_red_10_31223349
LG12.c.383.20	Female	-1896.57293667636	-1896.38800529479	12	383	20	402	12159	834108532	27586496	29862104	12178	835469777	28947741	31223349	1361245	0.369862763133369	0.543079083485734	28267118.5	834789154.5	30542726.5	cela1_red_10_29862104	cela1_red_10_31223349
LG12.c.384.20	Both	-2818.07797057739	-2817.32263012838	12	384	20	403	12160	834179543	27657507	29933115	12179	835549102	29027066	31302674	1369559	1.51068089801174	0.219035216774417	28342286.5	834864322.5	30617894.5	cela1_red_10_29933115	cela1_red_10_31302674
LG12.c.384.20	Male	-884.668816516463	-882.669387946418	12	384	20	403	12160	834179543	27657507	29933115	12179	835549102	29027066	31302674	1369559	3.99885714008997	0.0455311269733762	28342286.5	834864322.5	30617894.5	cela1_red_10_29933115	cela1_red_10_31302674
LG12.c.384.20	Female	-1896.56811956199	-1896.55694299549	12	384	20	403	12160	834179543	27657507	29933115	12179	835549102	29027066	31302674	1369559	0.0223531330016158	0.881151501794015	28342286.5	834864322.5	30617894.5	cela1_red_10_29933115	cela1_red_10_31302674
LG12.c.385.20	Both	-2818.08042844459	-2817.28153905723	12	385	20	404	12161	834198236	27676200	29951808	12180	835608514	29086478	31362086	1410278	1.59777877473243	0.206218274975799	28381339	834903375	30656947	cela1_red_10_29951808	cela1_red_10_31362086
LG12.c.385.20	Male	-884.668629349204	-882.924337984374	12	385	20	404	12161	834198236	27676200	29951808	12180	835608514	29086478	31362086	1410278	3.48858272965845	0.061793466435734	28381339	834903375	30656947	cela1_red_10_29951808	cela1_red_10_31362086
LG12.c.385.20	Female	-1896.56897473973	-1896.54331633287	12	385	20	404	12161	834198236	27676200	29951808	12180	835608514	29086478	31362086	1410278	0.0513168137281355	0.820787559122454	28381339	834903375	30656947	cela1_red_10_29951808	cela1_red_10_31362086
LG12.c.386.20	Both	-2818.08076018885	-2817.27235475641	12	386	20	405	12162	834230597	27708561	29984169	12181	835639232	29117196	31392804	1408635	1.61681086488079	0.203537040934972	28412878.5	834934914.5	30688486.5	cela1_red_10_29984169	cela1_red_10_31392804
LG12.c.386.20	Male	-884.669005544573	-882.830120150299	12	386	20	405	12162	834230597	27708561	29984169	12181	835639232	29117196	31392804	1408635	3.67777078854715	0.0551425290708791	28412878.5	834934914.5	30688486.5	cela1_red_10_29984169	cela1_red_10_31392804
LG12.c.386.20	Female	-1896.56893966689	-1896.54434174341	12	386	20	405	12162	834230597	27708561	29984169	12181	835639232	29117196	31392804	1408635	0.0491958469592646	0.824468514276335	28412878.5	834934914.5	30688486.5	cela1_red_10_29984169	cela1_red_10_31392804
LG12.c.387.20	Both	-2818.08253831097	-2817.31930585308	12	387	20	406	12163	834310279	27788243	30063851	12182	835806465	29284429	31560037	1496186	1.52646491578525	0.216643774158328	28536336	835058372	30811944	cela1_red_10_30063851	cela1_red_10_31560037
LG12.c.387.20	Male	-884.670125174205	-882.65535004516	12	387	20	406	12163	834310279	27788243	30063851	12182	835806465	29284429	31560037	1496186	4.02955025808888	0.0447098582340678	28536336	835058372	30811944	cela1_red_10_30063851	cela1_red_10_31560037
LG12.c.387.20	Female	-1896.56865688657	-1896.55164327512	12	387	20	406	12163	834310279	27788243	30063851	12182	835806465	29284429	31560037	1496186	0.0340272228936556	0.853648922890955	28536336	835058372	30811944	cela1_red_10_30063851	cela1_red_10_31560037
LG12.c.388.20	Both	-2818.07974653647	-2817.38237662946	12	388	20	407	12164	834338095	27816059	30091667	12183	836012199	29490163	31765771	1674104	1.39473981402443	0.237606286535916	28653111	835175147	30928719	cela1_red_10_30091667	cela1_red_10_31765771
LG12.c.388.20	Male	-884.668641115264	-882.910435612343	12	388	20	407	12164	834338095	27816059	30091667	12183	836012199	29490163	31765771	1674104	3.51641100584311	0.0607638953859134	28653111	835175147	30928719	cela1_red_10_30091667	cela1_red_10_31765771
LG12.c.388.20	Female	-1896.56854081921	-1896.55235147835	12	388	20	407	12164	834338095	27816059	30091667	12183	836012199	29490163	31765771	1674104	0.0323786817216387	0.857199065514733	28653111	835175147	30928719	cela1_red_10_30091667	cela1_red_10_31765771
LG12.c.389.20	Both	-2818.07968729764	-2817.48050162579	12	389	20	408	12165	834378322	27856286	30131894	12184	836038815	29516779	31792387	1660493	1.19837134369391	0.273647437344412	28686532.5	835208568.5	30962140.5	cela1_red_10_30131894	cela1_red_10_31792387
LG12.c.389.20	Male	-884.668727939585	-882.860081928439	12	389	20	408	12165	834378322	27856286	30131894	12184	836038815	29516779	31792387	1660493	3.61729202229117	0.0571818775303632	28686532.5	835208568.5	30962140.5	cela1_red_10_30131894	cela1_red_10_31792387
LG12.c.389.20	Female	-1896.56808729411	-1896.5603895221	12	389	20	408	12165	834378322	27856286	30131894	12184	836038815	29516779	31792387	1660493	0.0153955440109712	0.901252898253382	28686532.5	835208568.5	30962140.5	cela1_red_10_30131894	cela1_red_10_31792387
LG12.c.390.20	Both	-2818.07750144878	-2817.55965171471	12	390	20	409	12166	834437182	27915146	30190754	12185	836060104	29538068	31813676	1622922	1.03569946814605	0.308823775455486	28726607	835248643	31002215	cela1_red_10_30190754	cela1_red_10_31813676
LG12.c.390.20	Male	-884.667316887776	-883.400436186697	12	390	20	409	12166	834437182	27915146	30190754	12185	836060104	29538068	31813676	1622922	2.53376140215869	0.11143429846068	28726607	835248643	31002215	cela1_red_10_30190754	cela1_red_10_31813676
LG12.c.390.20	Female	-1896.56926675503	-1896.54082595793	12	390	20	409	12166	834437182	27915146	30190754	12185	836060104	29538068	31813676	1622922	0.0568815942128822	0.811494381540359	28726607	835248643	31002215	cela1_red_10_30190754	cela1_red_10_31813676
LG12.c.391.20	Both	-2818.07634172634	-2817.55632403472	12	391	20	410	12167	834600139	28078103	30353711	12186	836134359	29612323	31887931	1534220	1.04003538325196	0.307813242844178	28845213	835367249	31120821	cela1_red_10_30353711	cela1_red_10_31887931
LG12.c.391.20	Male	-884.666117851818	-883.651600939035	12	391	20	410	12167	834600139	28078103	30353711	12186	836134359	29612323	31887931	1534220	2.02903382556565	0.154318683900725	28845213	835367249	31120821	cela1_red_10_30353711	cela1_red_10_31887931
LG12.c.391.20	Female	-1896.56994880029	-1896.52427505336	12	391	20	410	12167	834600139	28078103	30353711	12186	836134359	29612323	31887931	1534220	0.0913474938552099	0.762471035085084	28845213	835367249	31120821	cela1_red_10_30353711	cela1_red_10_31887931
LG12.c.392.20	Both	-2818.07270168334	-2817.65386608754	12	392	20	411	12168	834666628	28144592	30420200	12187	836166590	29644554	31920162	1499962	0.837671191606205	0.360063661657516	28894573	835416609	31170181	cela1_red_10_30420200	cela1_red_10_31920162
LG12.c.392.20	Male	-884.664222672452	-884.101537784716	12	392	20	411	12168	834666628	28144592	30420200	12187	836166590	29644554	31920162	1499962	1.12536977547279	0.288765133468559	28894573	835416609	31170181	cela1_red_10_30420200	cela1_red_10_31920162
LG12.c.392.20	Female	-1896.56943099149	-1896.5339691719	12	392	20	411	12168	834666628	28144592	30420200	12187	836166590	29644554	31920162	1499962	0.0709236391730883	0.789996679696062	28894573	835416609	31170181	cela1_red_10_30420200	cela1_red_10_31920162
LG12.c.393.20	Both	-2818.0725251313	-2817.63563458156	12	393	20	412	12169	834857318	28335282	30610890	12188	836207088	29685052	31960660	1349770	0.873781099478038	0.34991066292992	29010167	835532203	31285775	cela1_red_10_30610890	cela1_red_10_31960660
LG12.c.393.20	Male	-884.6643925879	-884.091220736218	12	393	20	412	12169	834857318	28335282	30610890	12188	836207088	29685052	31960660	1349770	1.14634370336216	0.284315850557261	29010167	835532203	31285775	cela1_red_10_30610890	cela1_red_10_31960660
LG12.c.393.20	Female	-1896.56861386368	-1896.54948042382	12	393	20	412	12169	834857318	28335282	30610890	12188	836207088	29685052	31960660	1349770	0.0382668797146835	0.844908214575657	29010167	835532203	31285775	cela1_red_10_30610890	cela1_red_10_31960660
LG12.c.394.20	Both	-2818.0708223091	-2817.63149845238	12	394	20	413	12170	834907981	28385945	30661553	12189	836316542	29794506	32070114	1408561	0.878647713454484	0.348572327424758	29090225.5	835612261.5	31365833.5	cela1_red_10_30661553	cela1_red_10_32070114
LG12.c.394.20	Male	-884.664369906498	-884.072997195036	12	394	20	413	12170	834907981	28385945	30661553	12189	836316542	29794506	32070114	1408561	1.18274542292397	0.276797789948423	29090225.5	835612261.5	31365833.5	cela1_red_10_30661553	cela1_red_10_32070114
LG12.c.394.20	Female	-1896.56729412754	-1896.56566961472	12	394	20	413	12170	834907981	28385945	30661553	12189	836316542	29794506	32070114	1408561	0.00324902563170326	0.954545016038348	29090225.5	835612261.5	31365833.5	cela1_red_10_30661553	cela1_red_10_32070114
LG12.c.395.20	Both	-2818.06858716839	-2817.66702793976	12	395	20	414	12171	834981606	28459570	30735178	12190	836401376	29879340	32154948	1419770	0.803118457243727	0.370162634546413	29169455	835691491	31445063	cela1_red_10_30735178	cela1_red_10_32154948
LG12.c.395.20	Male	-884.664298316087	-884.055872292783	12	395	20	414	12171	834981606	28459570	30735178	12190	836401376	29879340	32154948	1419770	1.21685204660776	0.269979324978181	29169455	835691491	31445063	cela1_red_10_30735178	cela1_red_10_32154948
LG12.c.395.20	Female	-1896.56600551411	-1896.56600961499	12	395	20	414	12171	834981606	28459570	30735178	12190	836401376	29879340	32154948	1419770	-8.20177228888497e-06	1	29169455	835691491	31445063	cela1_red_10_30735178	cela1_red_10_32154948
LG12.c.396.20	Both	-2818.06478340433	-2817.78483647125	12	396	20	415	12172	835164277	28642241	30917849	12191	836402952	29880916	32156524	1238675	0.559893866157836	0.454303008660825	29261578.5	835783614.5	31537186.5	cela1_red_10_30917849	cela1_red_10_32156524
LG12.c.396.20	Male	-884.663646576445	-884.120146294962	12	396	20	415	12172	835164277	28642241	30917849	12191	836402952	29880916	32156524	1238675	1.08700056296721	0.29713674391136	29261578.5	835783614.5	31537186.5	cela1_red_10_30917849	cela1_red_10_32156524
LG12.c.396.20	Female	-1896.56491823129	-1896.5649258758	12	396	20	415	12172	835164277	28642241	30917849	12191	836402952	29880916	32156524	1238675	-1.52890120261873e-05	1	29261578.5	835783614.5	31537186.5	cela1_red_10_30917849	cela1_red_10_32156524
LG12.c.397.20	Both	-2818.06463942027	-2817.78356028586	12	397	20	416	12173	835218332	28696296	30971904	12192	836403584	29881548	32157156	1185252	0.562158268809071	0.453391948062813	29288922	835810958	31564530	cela1_red_10_30971904	cela1_red_10_32157156
LG12.c.397.20	Male	-884.663750991598	-884.083106616649	12	397	20	416	12173	835218332	28696296	30971904	12192	836403584	29881548	32157156	1185252	1.16128874989886	0.281198425333249	29288922	835810958	31564530	cela1_red_10_30971904	cela1_red_10_32157156
LG12.c.397.20	Female	-1896.56486401312	-1896.56487221089	12	397	20	416	12173	835218332	28696296	30971904	12192	836403584	29881548	32157156	1185252	-1.63955382959102e-05	1	29288922	835810958	31564530	cela1_red_10_30971904	cela1_red_10_32157156
LG12.c.398.20	Both	-2818.0567505939	-2818.05573174358	12	398	20	417	12174	835249446	28727410	31003018	12193	836454418	29932382	32207990	1204972	0.00203770064854325	0.963995002950536	29329896	835851932	31605504	cela1_red_10_31003018	cela1_red_10_32207990
LG12.c.398.20	Male	-884.663199901936	-884.316919467482	12	398	20	417	12174	835249446	28727410	31003018	12193	836454418	29932382	32207990	1204972	0.692560868908686	0.405294697788314	29329896	835851932	31605504	cela1_red_10_31003018	cela1_red_10_32207990
LG12.c.398.20	Female	-1896.56307831678	-1896.56308226612	12	398	20	417	12174	835249446	28727410	31003018	12193	836454418	29932382	32207990	1204972	-7.89866862760391e-06	1	29329896	835851932	31605504	cela1_red_10_31003018	cela1_red_10_32207990
LG12.c.399.20	Both	-2818.05583454406	-2818.05583649069	12	399	20	418	12175	835293948	28771912	31047520	12194	836459820	29937784	32213392	1165872	-3.89325577998534e-06	1	29354848	835876884	31630456	cela1_red_10_31047520	cela1_red_10_32213392
LG12.c.399.20	Male	-884.661781782158	-884.611964315565	12	399	20	418	12175	835293948	28771912	31047520	12194	836459820	29937784	32213392	1165872	0.0996349331876445	0.752268169039888	29354848	835876884	31630456	cela1_red_10_31047520	cela1_red_10_32213392
LG12.c.399.20	Female	-1896.56338524817	-1896.56338892137	12	399	20	418	12175	835293948	28771912	31047520	12194	836459820	29937784	32213392	1165872	-7.34640161681455e-06	1	29354848	835876884	31630456	cela1_red_10_31047520	cela1_red_10_32213392
LG12.c.400.20	Both	-2818.05843095275	-2818.04635191252	12	400	20	419	12176	835377835	28855799	31131407	12195	836510901	29988865	32264473	1133066	0.0241580804577097	0.87648336059217	29422332	835944368	31697940	cela1_red_10_31131407	cela1_red_10_32264473
LG12.c.400.20	Male	-884.662351993183	-884.536781682162	12	400	20	419	12176	835377835	28855799	31131407	12195	836510901	29988865	32264473	1133066	0.25114062204193	0.616273073142297	29422332	835944368	31697940	cela1_red_10_31131407	cela1_red_10_32264473
LG12.c.400.20	Female	-1896.56454168919	-1896.56454423337	12	400	20	419	12176	835377835	28855799	31131407	12195	836510901	29988865	32264473	1133066	-5.08835637447191e-06	1	29422332	835944368	31697940	cela1_red_10_31131407	cela1_red_10_32264473
LG12.c.401.20	Both	-2818.05924063923	-2818.0374674353	12	401	20	420	12177	835418864	28896828	31172436	12196	836635142	30113106	32388714	1216278	0.0435464078664154	0.834699802213518	29504967	836027003	31780575	cela1_red_10_31172436	cela1_red_10_32388714
LG12.c.401.20	Male	-884.662130888319	-884.587295071088	12	401	20	420	12177	835418864	28896828	31172436	12196	836635142	30113106	32388714	1216278	0.149671634461129	0.698849353826412	29504967	836027003	31780575	cela1_red_10_31172436	cela1_red_10_32388714
LG12.c.401.20	Female	-1896.56561877306	-1896.56562021588	12	401	20	420	12177	835418864	28896828	31172436	12196	836635142	30113106	32388714	1216278	-2.88564569927985e-06	1	29504967	836027003	31780575	cela1_red_10_31172436	cela1_red_10_32388714
